# Supplementary material
Source: Research Square preprint supplement (doi:10.21203/rs.3.rs-10018077/v1)
Supplement: Supplementary file 2 [file f88dac0a8f5e3ed8e459a4d5.xlsx]

## Sheet: Supplementary Table1 MCF7_UP
From the dynamic PABC media vs. Static MCF7 conditioned cultureNetwork made from UPREGUALTED DEPs and nonDEPs								From the dynamic PABC media vs. Static MCF7 conditioned cultureNetwok made from UPREGUALTED DEP and nonDEPs
DEPs ranked by Degree (Top )				DEPs ranked by Closeness Centrality				nonDEPs ranked by Degree (Top )				nonDEPs ranked by Closeness Centrality				Network Visualization									Network Quick Facts
Uniprot ID	Name	Degree		Uniprot ID	Name	Closeness Centrality		Uniprot ID	Name	Degree		Uniprot ID	Name	Closeness Centrality		NOTE: A Degree-sorted circle layout has been applied to the 20 highest Degree DEPs									1721	The total number of nodes (DEPs and nonDEPs) in the main connected component
CANX	P27824	256		EGFR	P00533	0.499855		CUL3	Q13618	356		CUL3	Q13618	0.520739		All other proteins and the edges between them have been set to a low opacity									22572	The total number of edges in the main connected component
EGFR	P00533	229		CANX	P27824	0.498118		YWHAG	P61981	338		YWHAG	P61981	0.513126		NOTE: the colouring of the nodes is based on Degree.									17.23	The average Degree of DEPs in the main connected component
RPS16	P62249	179		LAMP1	P11279	0.459034		DDX21	Q9NR30	269		HSPA5	P11021	0.487252		Higher Degree nodes are darker blue, and lower Degree nodes are lighter blue									28.63	The average Degree of nonDEPs in the main connected component
CUL2	Q13617	150		CUL2	Q13617	0.452989		COPS5	Q92905	247		CAND1	Q86VP6	0.48519
LAMP1	P11279	142		RPS16	P62249	0.44548		CAND1	Q86VP6	234		COPS5	Q92905	0.484917
EFTUD2	Q15029	114		HYOU1	Q9Y4L1	0.443299		ZC3H11A	O75152	222		YWHAZ	P63104	0.482604											DEPs not in the main connected component include:
TOP2A	P11388	110		EFTUD2	Q15029	0.441819		ILF3	Q12906	216		DDX21	Q9NR30	0.481658											(CEACAM1, CEACAM5, CRISPLD2, VNN1, GPX3, TCEAL3, GALNT3, RGN, SHBG, PCDHB8, ACSS2, ENPP2, ENPEP, CRIM1, PGLYRP2, LY6G6C, PGF)
INSR	P06213	83		SEC16A	O15027	0.438999		SMNDC1	O75940	211		FN1	P02751	0.48085
RPS13	P62277	62		TUBA4A	P68366	0.438776		CUL1	Q13616	209		ZDHHC5	Q9C0B5	0.477115
TUBA4A	P68366	58		NDRG1	Q92597	0.437882		ZDHHC5	Q9C0B5	207		CTBP1	Q13363	0.476059
PSMD12	O00232	56		ATP6V1A	P38606	0.436881		YWHAZ	P63104	206		ILF3	Q12906	0.473177											Results
SKP1	P63208	56		TOP2A	P11388	0.431835		LIN28B	Q6ZN17	204		SMNDC1	O75940	0.472138											These DEPs are both in the list of the top 20 highest Degree and top 20 highest closeness centrality lists:
SEC16A	O15027	55		JUP	P14923	0.427967		FN1	P02751	191		ZC3H11A	O75152	0.471233											(CANX, EGFR, RPS16, CUL2, LAMP1, EFTUD2, TOP2A, TUBA4A, SKP1, SEC16A, ATP6V1A, KPNA1, HYOU1, NDRG1)
NEDD4	P46934	54		DDX18	Q9NVP1	0.427542		RPS11	P62280	191		CUL1	Q13616	0.470202
ATP6V1A	P38606	52		SKP1	P63208	0.42627		RPS3	P23396	187		OTUB1	Q96FW1	0.465746											These nonDEPs are both in the list of the top 20 highest Degree and top 20 highest closeness centrality lists:
PSEN1	P49768	51		RPN2	P04844	0.426165		SF3B4	Q15427	183		RPS3	P23396	0.463487											(CUL3, YWHAG, DDX21, COPS5, CAND1, ZC3H11A, ILF3, SMNDC1, CUL1, ZDHHC5, YWHAZ, FN1, RPS3, SF3B4, SRSF7, LARP7, CTBP1, RBM15)
KPNA1	P52294	51		KPNA1	P52294	0.425216		SRSF7	Q16629	183		SF3B4	Q15427	0.463113
CBLN4	Q9NTU7	50		DNAJB11	Q9UBS4	0.423228		LARP7	Q4G0J3	175		SRSF7	Q16629	0.461126
NDRG1	Q92597	50		ATP5F1B	P06576	0.420538		CTBP1	Q13363	168		LARP7	Q4G0J3	0.460879
HYOU1	Q9Y4L1	50		SEC24B	O95487	0.420538		RBM15	Q96T37	160		RBM15	Q96T37	0.460509
RPS25	P62851	49		PRDX4	Q13162	0.419819		DLD	P09622	158		DLD	P09622	0.458789
FGB	P02675	48		RPS13	P62277	0.419001		RPL5	P46777	149		LIN28B	Q6ZN17	0.456354
EPHB2	P29323	47		RPS25	P62851	0.416263		CUL5	Q93034	142		ERBB2	P04626	0.456354
COL1A1	P02452	46		CAVIN1	Q6NZI2	0.415961		G3BP2	Q9UN86	141		RPS11	P62280	0.455508
ALB	P02768	46		RPS7	P62081	0.415158		HSPA5	P11021	136		YWHAB	P31946	0.453946
RPL27A	P46776	46		TRA2B	P62995	0.414258		SRP9	P49458	136		HSP90B1	P14625	0.45287
UBE2N	P61088	45		INSR	P06213	0.41366		CSNK2A2	P19784	135		CSNK2A2	P19784	0.452275
JUP	P14923	44		UBE2N	P61088	0.413263		RPL4	P36578	132		YWHAE	P62258	0.449086
DNAJB9	Q9UBS3	43		TNFRSF1A	P19438	0.412075		SSRP1	Q08945	131		VDAC1	P21796	0.448852
A2M	P01023	43		PLOD1	Q02809	0.411877		EIF3G	O75821	129		CUL5	Q93034	0.448735
DDX18	Q9NVP1	42		NUP153	P49790	0.411582		TGOLN2	O43493	128		YWHAH	Q04917	0.448267
IDS	P22304	41		NEDD4	P46934	0.41109		OTUB1	Q96FW1	126		RPL5	P46777	0.448033
NOTCH1	P46531	41		ANXA1	P04083	0.410403		YWHAH	Q04917	125		SSRP1	Q08945	0.447102
LGALS8	O00214	41		GIGYF2	Q6Y7W6	0.408163		FMR1	Q06787	123		IGF1R	P08069	0.446753
RPS7	P62081	41		PRCC	Q92733	0.408163		HNRNPU	Q00839	123		NONO	Q15233	0.44629
PSMD1	Q99460	40		ANXA2	P07355	0.406812		PAK4	O96013	122		KPNB1	Q14974	0.44629
SRSF4	Q08170	40		RPL27A	P46776	0.406331		RPS6	P62753	121		VAPA	Q9P0L0	0.446058
NUP153	P49790	40		MIA3	Q5JRA6	0.406331		SRP68	Q9UHB9	120		PAK4	O96013	0.445711
TNFRSF1A	P19438	40		UGGT1	Q9NYU2	0.406331		RPL11	P62913	119		ZC3HAV1	Q7Z2W4	0.445019
RPN2	P04844	38		PSMD12	O00232	0.405756		PRNP	P04156	115		HSP90AA1	P07900	0.443185
CEP170	Q5SW79	37		S100A9	P06702	0.405565		SOD1	P00441	114		FMR1	Q06787	0.442842
PRPF3	O43395	35		TARDBP	Q13148	0.405278		DRG1	Q9Y295	114		CUL4A	Q13619	0.442842
MTA1	Q13330	35		CEP170	Q5SW79	0.402905		TAF15	Q92804	113		PCNA	P12004	0.441592
EPB41L3	Q9Y2J2	35		TRIP12	Q14669	0.402716		IGF1R	P08069	112		TAF15	Q92804	0.441252
COPZ1	P61923	35		COPZ1	P61923	0.402245		SRP72	O76094	110		CTNNB1	P35222	0.440913
TRA2B	P62995	34		ALB	P02768	0.401681		ERBB2	P04626	109		RAB5A	P20339	0.440574
ST8SIA4	Q92187	33		KRT1	P04264	0.401681		YWHAB	P31946	108		EIF3G	O75821	0.440461
MIF	P14174	33		SLC2A1	P11166	0.400652		RPL10	P27635	108		SOD1	P00441	0.44001
ANXA7	P20073	33		PARD3	Q8TEW0	0.4		MAPRE1	Q15691	106		HNRNPU	Q00839	0.439336
TRIP12	Q14669	33		ANXA7	P20073	0.398425		NCAPH	Q15003	106		MAPRE1	Q15691	0.438217
FTL	P02792	32		SRSF4	Q08170	0.398333		NONO	Q15233	105		RUVBL2	Q9Y230	0.437214
PLOD1	Q02809	32		GRWD1	Q9BQ67	0.398148		CAPRIN1	Q14444	105		PRKDC	P78527	0.437214
TSG101	Q99816	31		DIS3	Q9Y2L1	0.397596		YWHAE	P62258	104		CSNK2B	P67870	0.436659
DCAF1	Q9Y4B6	30		SH3KBP1	Q96B97	0.397412		ZC3H18	Q86VM9	104		LMNA	P02545	0.436659
S100A9	P06702	30		EPB41L3	Q9Y2J2	0.397229		NCBP3	Q53F19	103		C1QBP	Q07021	0.436437
ANXA2	P07355	30		SRSF11	Q05519	0.397137		METAP2	P50579	102		SNRPA	P09012	0.436327
CAVIN1	Q6NZI2	30		RACGAP1	Q9H0H5	0.396862		SNRPA	P09012	97		AGO2	Q9UKV8	0.436327
ATP5F1B	P06576	30		MIF	P14174	0.396679		VDAC1	P21796	94		ILK	Q13418	0.436216
DNAJB11	Q9UBS4	30		KRT14	P02533	0.39513		CUL4A	Q13619	94		SRPK1	Q96SB4	0.435995
SH3KBP1	Q96B97	29		S100A8	P05109	0.395039		PCNA	P12004	94		P4HB	P07237	0.435995
TARDBP	Q13148	28		MTA1	Q13330	0.394315		POLD3	Q15054	94		COPB2	P35606	0.435774
GIGYF2	Q6Y7W6	28		CDH2	P19022	0.393953		RPL35	P42766	94		HSD17B10	Q99714	0.434343
SLC31A1	O15431	27		KDM3B	Q7LBC6	0.393593		RPS19	P39019	94		FXR1	P51114	0.434234
P4HA1	P13674	27		P4HA1	P13674	0.393503		RPLP0	P05388	94		VCP	P55072	0.434015
ANXA1	P04083	27		PSEN1	P49768	0.393413		CSNK2B	P67870	93		RAB5C	P51148	0.433905
SEC24B	O95487	27		RBM22	Q9NW64	0.393323		SRPK1	Q96SB4	93		ESYT1	Q9BSJ8	0.433686
DIS3	Q9Y2L1	26		COL1A1	P02452	0.392515		DNM1L	O00429	93		DNM1L	O00429	0.433249
PRCC	Q92733	26		A2M	P01023	0.392425		AGO2	Q9UKV8	92		SRP72	O76094	0.43314
PLAUR	Q03405	25		CAT	P04040	0.391621		RPS8	P62241	92		GAPDH	P04406	0.43314
LAIR2	Q6ISS4	25		KRT5	P13647	0.391354		SRSF6	Q13247	92		RPL4	P36578	0.432922
ATL3	Q6DD88	25		PSMD1	Q99460	0.391265		EIF4A3	P38919	91		PARP1	P09874	0.432922
S100P	P25815	25		BLM	P54132	0.390909		RPL7A	P62424	91		EIF4A3	P38919	0.432704
SRSF11	Q05519	25		NIPBL	Q6KC79	0.388613		SDF2L1	Q9HCN8	90		SERPINH1	P50454	0.432269
BLM	P54132	24		LGALS8	O00214	0.388437		RAB5A	P20339	88		LRRC59	Q96AG4	0.432052
RBM22	Q9NW64	24		CASP14	P31944	0.388262		ILK	Q13418	88		RPS6	P62753	0.431944
CAT	P04040	23		EIF2A	Q9BY44	0.388087		RPS2	P15880	87		TFRC	P02786	0.431944
KRT1	P04264	23		KRT10	P13645	0.387562		FLT4	P35916	87		RPL12	P30050	0.431294
MIA3	Q5JRA6	23		SYAP1	Q96A49	0.387039		EIF2S3	P41091	87		ATP1A1	P05023	0.431294
PRDX4	Q13162	23		FGB	P02675	0.38617		GSPT1	P15170	87		RPL11	P62913	0.431078
HK1	P19367	22		LRP1	Q07954	0.386083		TRA2A	Q13595	84		DYNC1H1	Q14204	0.43097
RACGAP1	Q9H0H5	22		PRPF3	O43395	0.38591		FGFR3	P22607	84		MYH9	P35579	0.430538
SLC2A1	P11166	22		HK1	P19367	0.385823		RPL13	P26373	84		COPS6	Q7L5N1	0.430323
ALPP	P05187	21		ZNF609	O15014	0.385218		EPHA7	Q15375	84		ILF2	Q12905	0.430323
TGM1	P22735	21		AZGP1	P25311	0.384529		COPS6	Q7L5N1	83		PRNP	P04156	0.430215
APOA1	P02647	21		GOLGA3	Q08378	0.384272		SNRPF	P62306	82		G3BP2	Q9UN86	0.430108
ARFGEF2	Q9Y6D5	21		NOTCH1	P46531	0.383929		RPL13A	P40429	82		FLOT1	O75955	0.430108
EIF2B2	P49770	21		KRT2	P35908	0.383757		HSD17B10	Q99714	81		TFG	Q92734	0.429893
EIF2A	Q9BY44	21		KRT9	P35527	0.381629		TPT1	P13693	81		RPN1	P04843	0.429893
PARD3	Q8TEW0	21		EPHB2	P29323	0.381037		RPL36	Q9Y3U8	81		TRA2A	Q13595	0.429678
KPRP	Q5T749	20		HSPA13	P48723	0.379775		EIF3B	P55884	81		GANAB	Q14697	0.429678
KDM3B	Q7LBC6	20		S100A7	P31151	0.379691		LMNA	P02545	79		CLTA	P09496	0.42957
KRT14	P02533	20		CSTA	P01040	0.378855		ZC3HAV1	Q7Z2W4	77		AIFM1	O95831	0.429035
TXNIP	Q9H3M7	19		ALDOC	P09972	0.378271		RPL23A	P62750	77		NCBP3	Q53F19	0.428821
VAC14	Q08AM6	19		MVP	Q14764	0.378022		FXR1	P51114	75		TXN	P10599	0.428714
FHL3	Q13643	19		IDS	P22304	0.377524		DCUN1D1	Q96GG9	75		SFN	P31947	0.42818
PSME3IP1	Q9GZU8	19		CD109	Q6YHK3	0.37711		RPL8	P62917	75		LIMA1	Q9UHB6	0.427967
PBXIP1	Q96AQ6	19		CALU	O43852	0.376038		KPNB1	Q14974	73		DNAJA1	P31689	0.427967
S100A7	P31151	19		S100P	P25815	0.375218		AIFM1	O95831	73		TPR	P12270	0.427861
HSPA13	P48723	19		PRPSAP1	Q14558	0.375218		RPL17	P18621	73		RPL10A	P62906	0.427754
CDH2	P19022	19		RNMT	O43148	0.37432		GOT1	P17174	73		DDX5	P17844	0.427648
GRWD1	Q9BQ67	19		PFKM	P08237	0.373994		C1QBP	Q07021	72		DDOST	P39656	0.427435
SPAG9	O60271	18		EPPK1	P58107	0.373913		RPL30	P62888	72		HSPA4	P34932	0.427435
POLR2G	P62487	18		CPNE8	Q86YQ8	0.373102		CD81	P60033	72		RPS2	P15880	0.427223
PIP	P12273	18		ATL3	Q6DD88	0.373021		RPL18	Q07020	72		TUBA1C	Q9BQE3	0.427011
POLR2H	P52434	18		CACNA2D1	P54289	0.372456		HTRA4	P83105	72		ARF4	P18085	0.427011
VTN	P04004	18		HRNR	Q86YZ3	0.371651		RPS3A	P61247	72		SSBP1	Q04837	0.427011
TF	P02787	18		TF	P02787	0.37133		HSP90AA1	P07900	71		TLN1	Q9Y490	0.426905
KRT2	P35908	18		KRT78	Q8N1N4	0.37109		CTNNB1	P35222	71		POLD3	Q15054	0.426799
NIPBL	Q6KC79	18		DCAF1	Q9Y4B6	0.37085		MYBBP1A	Q9BQG0	71		MTDH	Q86UE4	0.426799
S100A8	P05109	18		MMP14	P50281	0.37037		GGH	Q92820	71		ARRB1	P49407	0.426693
COL6A1	P12109	17		PKP3	Q9Y446	0.369892		RPL10A	P62906	70		CDK1	P06493	0.426693
BIN1	O00499	17		NQO2	P16083	0.369813		RPL31	P62899	70		SRP68	Q9UHB9	0.426587
DGCR2	P98153	17		LNPEP	Q9UIQ6	0.369495		RSL1D1	O76021	70		EPB41	P11171	0.426482
MMP14	P50281	17		EIF2B2	P49770	0.369416		VAPA	Q9P0L0	69		CKAP5	Q14008	0.426482
PRPSAP1	Q14558	17		APOB	P04114	0.368545		PSMD2	Q13200	69		SEC23B	Q15437	0.426165
CSTA	P01040	17		ENO2	P09104	0.368151		RUVBL2	Q9Y230	68		RPL35	P42766	0.426059
CASP14	P31944	17		TAOK1	Q7L7X3	0.368072		ARRB1	P49407	67		CTNND1	O60716	0.425953
UGGT1	Q9NYU2	17		FLG2	Q5D862	0.367443		LARP1	Q6PKG0	67		ZC3H18	Q86VM9	0.425743
CST6	Q15828	16		ATP6AP1	Q15904	0.367286		EZR	P15311	67		PSMD2	Q13200	0.425637
LOXL2	Q9Y4K0	16		FHL1	Q13642	0.367286		NOP56	O00567	67		ATP5F1A	P25705	0.425637
KRT10	P13645	16		ARFGEF2	Q9Y6D5	0.367051		ATP6AP2	O75787	67		SF3B3	Q15393	0.425321
KRT5	P13647	16		PBXIP1	Q96AQ6	0.367051		RPL15	P61313	66		SLC3A2	P08195	0.425321
NDST2	P52849	15		DNAJB9	Q9UBS3	0.36666		SRC	P12931	66		RPS8	P62241	0.425216
CPVL	Q9H3G5	15		DSG1	Q02413	0.366581		RPL28	P46779	66		EMD	P50402	0.425216
KRT9	P35527	15		TM9SF3	Q9HD45	0.366581		MYH9	P35579	65		RPS4X	P62701	0.425111
AZGP1	P25311	15		LOXL2	Q9Y4K0	0.365957		PARP1	P09874	64		LARP1	Q6PKG0	0.425006
LRP1	Q07954	15		KPRP	Q5T749	0.36588		U2AF1	Q01081	64		RPLP2	P05387	0.425006
TXNL4A	P83876	14		SERPINB3	P29508	0.365646		RPS9	P46781	64		FLT4	P35916	0.424691
HBA2	P69905	14		DGCR2	P98153	0.365491		TP53BP1	Q12888	64		U2AF1	Q01081	0.424587
ADAMTS1	Q9UHI8	14		FTL	P02792	0.364948		PSMA1	P25786	64		THRAP3	Q9Y2W1	0.424587
NDUFS6	O75380	14		AHSG	P02765	0.364871		DKC1	O60832	63		SRP9	P49458	0.424482
ADGRE5	P48960	14		HIRIP3	Q9BW71	0.364793		DNAJC2	Q99543	63		CCT2	P78371	0.424168
APOB	P04114	14		PSME3IP1	Q9GZU8	0.364639		ILF2	Q12905	62		HNRNPH1	P31943	0.424168
EPPK1	P58107	14		APMAP	Q9HDC9	0.364561		MTDH	Q86UE4	62		DDB1	Q16531	0.424063
RNMT	O43148	14		SUCO	Q9UBS9	0.364252		RPL37A	P61513	62		RPS19	P39019	0.42375
CALU	O43852	14		ECM1	Q16610	0.363944		SFN	P31947	61		PRRC2A	P48634	0.42375
CD109	Q6YHK3	14		KCTD12	Q96CX2	0.363944		EPHA1	P21709	61		PDIA3	P30101	0.42375
MVP	Q14764	14		LAIR2	Q6ISS4	0.363713		EPB41	P11171	60		DBN1	Q16643	0.423645
ZNF609	O15014	14		PLOD2	O00469	0.363636		DBN1	Q16643	60		RAB7A	P51149	0.423541
SDC1	P18827	13		VTN	P04004	0.36356		SF3B2	Q13435	59		SNRPF	P62306	0.423124
TMED7	Q9Y3B3	13		TSG101	Q99816	0.362946		NUMA1	Q14980	59		CAPRIN1	Q14444	0.42302
PBK	Q96KB5	13		ARG1	P05089	0.362869		RPL35A	P18077	59		SF3B2	Q13435	0.422812
POF1B	Q8WVV4	13		TGM3	Q08188	0.362029		RPLP2	P05387	58		STAT1	P42224	0.422501
TOR1B	O14657	13		TOR1B	O14657	0.361953		PSMC2	P35998	58		ACBD3	Q9H3P7	0.422293
SYAP1	Q96A49	13		APOA1	P02647	0.361725		RPS27A	P62979	58		SEC23A	Q15436	0.422189
FSTL1	Q12841	12		CST6	Q15828	0.36142		PRP4K	Q13523	58		DCUN1D1	Q96GG9	0.421879
RABIF	P47224	12		TGM1	P22735	0.361269		TUBA1C	Q9BQE3	57		RPL31	P62899	0.421879
PLBD1	Q6P4A8	12		ST8SIA4	Q92187	0.360814		CCT2	P78371	57		NOLC1	Q14978	0.421879
P3H1	Q32P28	12		LGMN	Q99538	0.360814		PSMB1	P20618	57		DNAJA2	O60884	0.421775
SDC4	P31431	12		CPVL	Q9H3G5	0.360738		RPL27	P61353	57		NUMA1	Q14980	0.421672
ICAM5	Q9UMF0	12		ICAM5	Q9UMF0	0.359908		PSMD6	Q15008	57		SRSF6	Q13247	0.421569
PLOD2	O00469	12		NDST2	P52849	0.359833		COPB2	P35606	56		RPL13A	P40429	0.421465
SERPINB3	P29508	12		POF1B	Q8WVV4	0.358483		LIMA1	Q9UHB6	56		EIF3F	O00303	0.421362
ATP6AP1	Q15904	12		CBLN4	Q9NTU7	0.358408		HNRNPH1	P31943	56		RBBP4	Q09028	0.421156
FHL1	Q13642	12		FHL3	Q13643	0.358408		NOLC1	Q14978	56		RPL35A	P18077	0.421053
FLG2	Q5D862	12		BIN1	O00499	0.35796		WTAP	Q15007	56		RPL3	P39023	0.420847
KRT78	Q8N1N4	12		DDRGK1	Q96HY6	0.357365		PSMC6	P62333	56		RPL10	P27635	0.420744
GOLGA3	Q08378	12		EXOC2	Q96KP1	0.357217		CLTA	P09496	55		TPT1	P13693	0.420538
COL4A2	P08572	11		PBK	Q96KB5	0.356181		RPS15	P62841	55		BCLAF1	Q9NYF8	0.420538
ATP6V1G1	O75348	11		NAGA	P17050	0.354566		CCT7	Q99832	55		CCDC124	Q96CT7	0.420538
SOD2	P04179	11		CFB	P00751	0.354493		PSMC5	P62195	55		PRRC2C	Q9Y520	0.420538
TBC1D22A	Q8WUA7	11		MLEC	Q14165	0.35442		PSMD3	O43242	55		FGFR3	P22607	0.420435
ARHGAP12	Q8IWW6	11		POLR2H	P52434	0.354055		HSP90B1	P14625	54		RPLP0	P05388	0.42023
CFB	P00751	11		ADGRE5	P48960	0.353691		RPS4X	P62701	54		SCFD1	Q8WVM8	0.420127
ECM1	Q16610	11		SDC4	P31431	0.353618		THRAP3	Q9Y2W1	54		MCM6	Q14566	0.420127
APMAP	Q9HDC9	11		MASP1	P48740	0.353618		PSMD11	O00231	54		LGALS3BP	Q08380	0.420127
LNPEP	Q9UIQ6	11		LTF	P02788	0.353546		ENG	P17813	53		ACTN4	O43707	0.420024
HRNR	Q86YZ3	11		PIP	P12273	0.352676		SF3B3	Q15393	52		RPL23A	P62750	0.419922
CTSL	P07711	10		S100A14	Q9HCY8	0.352604		PRRC2A	P48634	52		RPL36	Q9Y3U8	0.419819
IGSF8	Q969P0	10		P3H1	Q32P28	0.352315		HP1BP3	Q5SSJ5	52		RPL8	P62917	0.419717
FGG	P02679	10		NDUFS6	O75380	0.352242		MET	P08581	52		PSMB1	P20618	0.419717
COL1A2	P08123	10		PROS1	P07225	0.352098		PNN	Q9H307	52		PDIA6	Q15084	0.419512
LUM	P51884	10		ADAMTS1	Q9UHI8	0.351882		RPS24	P62847	52		BSG	P35613	0.41941
S100A14	Q9HCY8	10		CEMIP2	Q9UHN6	0.35181		EIF3A	Q14152	52		MYBBP1A	Q9BQG0	0.419308
LTF	P02788	10		ALPP	P05187	0.351738		RPL18A	Q02543	52		PLEC	Q15149	0.419308
NAGA	P17050	10		EFHD1	Q9BUP0	0.351738		SF3A2	Q15428	52		COPB1	P53618	0.419308
EXOC2	Q96KP1	10		CTH	P32929	0.351666		PSMC4	P43686	52		RPL27	P61353	0.419001
SUCO	Q9UBS9	10		HBA2	P69905	0.351523		DDOST	P39656	51		RPS15A	P62244	0.419001
HIRIP3	Q9BW71	10		DSC3	Q14574	0.351307		PPP1CC	P36873	51		ACTR2	P61160	0.419001
DSG1	Q02413	10		ARHGAP12	Q8IWW6	0.35052		RPS20	P60866	51		SDF2L1	Q9HCN8	0.418899
ENO2	P09104	10		TXNL4A	P83876	0.350448		RPS5	P46782	51		CCT5	P48643	0.418899
ALDOC	P09972	10		LUM	P51884	0.350448		SART3	Q15020	51		CCT8	P50990	0.418797
NELL2	Q99435	9		RNF114	Q9Y508	0.350448		PSMD4	P55036	51		ENO1	P06733	0.418695
MAN2B2	Q9Y2E5	9		GALK1	P51570	0.350305		PSMC3	P17980	51		TGOLN2	O43493	0.418491
QSOX2	Q6ZRP7	9		TBC1D22A	Q8WUA7	0.350234		RPL3	P39023	50		RPL15	P61313	0.418491
COMP	P49747	9		LRRFIP2	Q9Y608	0.350092		BCLAF1	Q9NYF8	50		AP2M1	Q96CW1	0.418491
GSTM3	P21266	9		GSDMA	Q96QA5	0.349949		CCT5	P48643	50		SNRNP200	O75643	0.41839
ITIH2	P19823	9		VAC14	Q08AM6	0.349522		ALYREF	Q86V81	50		EZR	P15311	0.418186
LYZ	P61626	9		LYZ	P61626	0.34938		H1-10	Q92522	50		RPS15	P62841	0.418085
MLEC	Q14165	9		SLC31A1	O15431	0.34931		PPP1CB	P62140	50		EIF2S1	P05198	0.418085
DDRGK1	Q96HY6	9		POLR2G	P62487	0.348955		PARK7	Q99497	50		RPL13	P26373	0.417983
TGM3	Q08188	9		ERO1A	Q96HE7	0.348955		CALD1	Q05682	50		SRC	P12931	0.417983
COL2A1	P02458	8		SPAG9	O60271	0.348884		SUPT5H	O00267	50		PSME3	P61289	0.417983
PLG	P00747	8		ITIH2	P19823	0.348743		KLK10	O43240	50		CCT7	Q99832	0.417881
VWA1	Q6PCB0	8		GUSB	P08236	0.347896		RAB5C	P51148	48		PPP1CC	P36873	0.417881
DLGAP4	Q9Y2H0	8		SERPINB12	Q96P63	0.347896		RPS15A	P62244	48		ALYREF	Q86V81	0.417881
CORO2A	Q92828	8		MCAM	P43121	0.347054		GORASP2	Q9H8Y8	48		H1-10	Q92522	0.41778
ADAMTS7	Q9UKP4	8		FKBP9	O95302	0.346774		CCT6A	P40227	48		RPL28	P46779	0.417678
IGF2	P01344	8		KIF4A	O95239	0.346634		DDX27	Q96GQ7	48		EIF3B	P55884	0.417577
NCCRP1	Q6ZVX7	8		TMED7	Q9Y3B3	0.346355		IGF2R	P11717	48		XRN2	Q9H0D6	0.417577
PLXNA1	Q9UIW2	8		TXNIP	Q9H3M7	0.34559		BYSL	Q13895	48		CHMP4B	Q9H444	0.417476
TOMM70	O94826	8		GDF15	Q99988	0.345174		GAPDH	P04406	47		NUP62	P37198	0.417374
PKP1	Q13835	8		PLBD1	Q6P4A8	0.344		CDK1	P06493	47		WTAP	Q15007	0.417273
SIL1	Q9H173	8		CRYZ	Q08257	0.34345		EIF3D	O15371	47		KTN1	Q86UP2	0.417273
FKBP9	O95302	8		COL1A2	P08123	0.343382		PSMB3	P49720	47		CALR	P27797	0.417172
AHSG	P02765	8		PLAUR	Q03405	0.343313		EPHA4	P54764	47		SLC16A1	P53985	0.417172
TM9SF3	Q9HD45	8		SIL1	Q9H173	0.343108		RPL12	P30050	46		RPL7A	P62424	0.417071
TAOK1	Q7L7X3	8		COL6A1	P12109	0.342357		DDX5	P17844	46		EIF6	P56537	0.417071
PKP3	Q9Y446	8		GSTM3	P21266	0.342289		PDIA3	P30101	46		PSMC2	P35998	0.416869
CPNE8	Q86YQ8	8		SOD2	P04179	0.34188		RAB7A	P51149	46		NUP210	Q8TEM1	0.416869
COL4A1	P02462	7		PKP1	Q13835	0.341473		RBBP4	Q09028	46		RPL17	P18621	0.416768
RHOD	O00212	7		TOMM70	O94826	0.341405		ACTR2	P61160	46		MAPK1	P28482	0.416364
OAF	Q86UD1	7		ATP6V1G1	O75348	0.341202		RPL6	Q02878	46		HP1BP3	Q5SSJ5	0.416163
ADGRG1	Q9Y653	7		FGG	P02679	0.341202		EIF3E	P60228	46		RPS18	P62269	0.416163
GGPS1	O95749	7		COMP	P49747	0.340932		PSMA5	P28066	46		RRBP1	Q9P2E9	0.416163
IMPA2	O14732	7		SERPINC1	P01008	0.340392		RPL7	P18124	46		EIF3I	Q13347	0.416062
ENDOD1	O94919	7		ATF6B	Q99941	0.339988		NOP2	P46087	46		RPS9	P46781	0.415961
TRIO	O75962	7		CTSB	P07858	0.339184		CAV1	Q03135	46		TP53BP1	Q12888	0.415961
GDF15	Q99988	7		MRC2	Q9UBG0	0.338516		LMNB1	P20700	46		MAP4K4	O95819	0.415961
KIF4A	O95239	7		FLG	P20930	0.33825		WFS1	O76024	46		NCAPH	Q15003	0.41576
MCAM	P43121	7		PLXNA1	Q9UIW2	0.337984		FKBP5	Q13451	46		RPS20	P60866	0.41576
GUSB	P08236	7		FAT1	Q14517	0.337785		EIF6	P56537	45		SSR1	P43307	0.415559
ERO1A	Q96HE7	7		NCCRP1	Q6ZVX7	0.337453		RPS18	P62269	45		MET	P08581	0.415359
GSDMA	Q96QA5	7		TRIO	O75962	0.337189		EIF3I	Q13347	45		PAK2	Q13177	0.415359
EFHD1	Q9BUP0	7		RABIF	P47224	0.337123		PRPF4	O43172	45		ERBB3	P21860	0.415359
LGMN	Q99538	7		ACP5	P13686	0.337057		EIF3K	Q9UBQ5	45		AKAP8L	Q9ULX6	0.415359
KCTD12	Q96CX2	7		NRP2	O60462	0.336661		CCT3	P49368	45		PEBP1	P30086	0.415359
NQO2	P16083	7		IGSF8	Q969P0	0.336069		EIF3M	Q7L2H7	45		EPRS1	P07814	0.415359
PFKM	P08237	7		COL4A2	P08572	0.335806		DCTN1	Q14203	45		BASP1	P80723	0.415258
MVB12A	Q96EY5	6		CELF1	Q92879	0.335806		SCARB2	Q14108	45		HDLBP	Q00341	0.415158
PLA2G2D	Q9UNK4	6		ADSS1	Q8N142	0.334761		EIF3H	O15372	45		PSMC5	P62195	0.414958
PSPH	P78330	6		QSOX2	Q6ZRP7	0.334435		PSMC1	P62191	45		RPL30	P62888	0.414858
PRSS3	P35030	6		ENDOD1	O94919	0.334435		PSMD13	Q9UNM6	45		IARS1	P41252	0.414858
GPALPP1	Q8IXQ4	6		SDC1	P18827	0.333851		DNASE1L1	P49184	45		DSP	P15924	0.414858
FRAS1	Q86XX4	6		IL37	Q9NZH6	0.333592		TFG	Q92734	44		RPS5	P46782	0.414758
PLA2G15	Q8NCC3	6		KRT80	Q6KB66	0.333592		CCT8	P50990	44		PICALM	Q13492	0.414758
MAN2B1	O00754	6		IGF2	P01344	0.333333		SNRNP200	O75643	44		PPP1CB	P62140	0.414558
CPA4	Q9UI42	6		SPARCL1	Q14515	0.333333		NME2	P22392	44		PNN	Q9H307	0.414458
FAT1	Q14517	6		ADAMTS7	Q9UKP4	0.33314		PSMA7	O14818	44		NME2	P22392	0.414358
CTSB	P07858	6		AKR1C3	P42330	0.33314		COPE	O14579	44		RSL1D1	O76021	0.414258
SERPINC1	P01008	6		IL1RAP	Q9NPH3	0.333011		ZFR	Q96KR1	44		CD81	P60033	0.414158
CRYZ	Q08257	6		PROCR	Q9UNN8	0.33256		FAM120A	Q9NZB2	44		PRMT5	O14744	0.414158
RNF114	Q9Y508	6		SLC29A2	Q14542	0.33256		IGF2BP1	Q9NZI8	44		RPS24	P62847	0.413859
DSC3	Q14574	6		CPA4	Q9UI42	0.332175		TCP1	P17987	44		PRPF40A	O75400	0.413859
CEMIP2	Q9UHN6	6		CORO2A	Q92828	0.332046		TYRO3	Q06418	44		GOT1	P17174	0.41376
ARG1	P05089	6		NCAM1	P13591	0.331407		PSMD7	P51665	44		RPL6	Q02878	0.41376
CACNA2D1	P54289	6		DOP1B	Q9Y3R5	0.331151		PAK2	Q13177	43		RPL23	P62829	0.41376
PRC1	O43663	5		MAN2B1	O00754	0.330896		PRPF40A	O75400	43		QARS1	P47897	0.413462
HGFAC	Q04756	5		DLGAP4	Q9Y2H0	0.330706		HNRNPUL2	Q1KMD3	43		ITGB1	P05556	0.413462
TTYH3	Q9C0H2	5		VWA1	Q6PCB0	0.330515		CHERP	Q8IWX8	43		CDK2	P24941	0.412965
MTM1	Q13496	5		CLEC3B	P05452	0.330451		EIF2AK2	P19525	43		AP2A1	O95782	0.412965
KRT7	P08729	5		COL3A1	P02461	0.330198		SDCBP	O00560	43		DRG1	Q9Y295	0.412668
C9	P02748	5		C1QTNF3	Q9BXJ4	0.329755		PSMB2	P49721	43		NOTCH2	Q04721	0.41247
ARSB	P15848	5		PPIF	P30405	0.329439		PTPN6	P29350	43		EPS15	P42566	0.41247
LRG1	P02750	5		IMPA2	O14732	0.329376		P4HB	P07237	42		SLC25A3	Q00325	0.41247
PPIF	P30405	5		PLA2G15	Q8NCC3	0.32925		DYNC1H1	Q14204	42		NSF	P46459	0.412371
NCAM1	P13591	5		GGPS1	O95749	0.328683		RPN1	P04843	42		RPL18	Q07020	0.412272
IL1RAP	Q9NPH3	5		PLG	P00747	0.328621		DDB1	Q16531	42		SMC3	Q9UQE7	0.412272
IL37	Q9NZH6	5		FRAS1	Q86XX4	0.327869		HMGA1	P17096	42		DKC1	O60832	0.412173
CELF1	Q92879	5		MST1	P26927	0.327681		SRP14	P37108	42		GORASP2	Q9H8Y8	0.412173
ACP5	P13686	5		LRG1	P02750	0.327121		PSMA6	P60900	42		VDAC2	P45880	0.412173
SERPINB12	Q96P63	5		GPALPP1	Q8IXQ4	0.326624		PSMA2	P25787	42		WDR77	Q9BQA1	0.411976
LRRFIP2	Q9Y608	5		CTSL	P07711	0.326376		PRKDC	P78527	41		PSMC6	P62333	0.411877
MASP1	P48740	5		ADGRG1	Q9Y653	0.326314		PLEC	Q15149	41		USP7	Q93009	0.411877
LRP11	Q86VZ4	4		ARSB	P15848	0.326314		PSME3	P61289	41		PFKP	Q01813	0.411877
NDST1	P52848	4		INTS13	Q9NVM9	0.325758		NUP62	P37198	41		YBX3	P16989	0.411779
MAN1A2	O60476	4		C9	P02748	0.325449		CDK2	P24941	41		PUF60	Q9UHX1	0.411779
APOH	P02749	4		FSTL1	Q12841	0.325265		USP7	Q93009	41		TUBB6	Q9BUF5	0.411779
SERPINF2	P08697	4		OAF	Q86UD1	0.325203		RPS28	P62857	41		AP1B1	Q10567	0.411779
F10	P00742	4		MAN2B2	Q9Y2E5	0.324957		RPL24	P83731	41		CSE1L	P55060	0.411779
CTSC	P53634	4		F2	P00734	0.324773		CCT4	P50991	41		PSMA1	P25786	0.411582
TINAGL1	Q9GZM7	4		CDH13	P55290	0.324773		PAK1	Q13153	41		PSMA7	O14818	0.411582
SLC38A10	Q9HBR0	4		NEU1	Q99519	0.323734		KPNA2	P52292	41		RPS27A	P62979	0.411483
CD99L2	Q8TCZ2	4		KRT7	P08729	0.32343		EPHA2	P29317	41		RPL37A	P61513	0.411286
CFI	P05156	4		NELL2	Q99435	0.323308		TSC22D1	Q15714	41		HNRNPUL2	Q1KMD3	0.411286
DPYS	Q14117	4		KRT77	Q7Z794	0.322944		UCHL5	Q9Y5K5	41		GGH	Q92820	0.41109
KRT77	Q7Z794	4		PRSS3	P35030	0.322581		CCDC124	Q96CT7	40		WDR5	P61964	0.410893
NEU1	Q99519	4		COL11A1	P12107	0.322581		ERBB3	P21860	40		RPS28	P62857	0.410795
F2	P00734	4		MUC5AC	P98088	0.322339		AKAP8L	Q9ULX6	40		HNRNPR	O43390	0.410795
CDH13	P55290	4		DPYS	Q14117	0.321435		PEBP1	P30086	40		FAU	P62861	0.410697
INTS13	Q9NVM9	4		F11	P03951	0.320119		NOTCH2	Q04721	40		TOR1AIP1	Q5JTV8	0.410697
CLEC3B	P05452	4		PSPH	P78330	0.319584		YBX3	P16989	40		CDKN2AIP	Q9NXV6	0.410599
DOP1B	Q9Y3R5	4		MTM1	Q13496	0.319465		HNRNPR	O43390	40		PARK7	Q99497	0.410403
PROCR	Q9UNN8	4		CFI	P05156	0.319228		PRPF8	Q6P2Q9	40		MACF1	Q9UPN3	0.410403
AKR1C3	P42330	4		TTYH3	Q9C0H2	0.318696		PSMD14	O00487	40		HTRA4	P83105	0.410305
FLG	P20930	4		CD99L2	Q8TCZ2	0.318165		TMED10	P49755	40		HNRNPUL1	Q9BUJ2	0.410305
MRC2	Q9UBG0	4		COL2A1	P02458	0.317812		UBQLN2	Q9UHD9	40		APPL1	Q9UKG1	0.410207
ATF6B	Q99941	4		HGFAC	Q04756	0.317109		PSMB7	Q99436	40		TPM3	P06753	0.410207
CTH	P32929	4		FABP7	O15540	0.317109		SERPINH1	P50454	39		ACLY	P53396	0.41011
CPQ	Q9Y646	3		PLA2G2D	Q9UNK4	0.316934		COPA	P53621	39		PSMB5	P28074	0.410012
IRF2BPL	Q9H1B7	3		MVB12A	Q96EY5	0.316817		RAB1A	P62820	39		SMC1A	Q14683	0.410012
PUS1	Q9Y606	3		RHOD	O00212	0.316176		C7orf50	Q9BRJ6	39		GCN1	Q92616	0.410012
C5	P01031	3		SLC38A10	Q9HBR0	0.314673		SART1	O43290	39		COPA	P53621	0.409914
SDK2	Q58EX2	3		TINAGL1	Q9GZM7	0.314615		EIF3L	Q9Y262	39		MACROH2A1	O75367	0.409817
STS	P08842	3		ANKMY2	Q8IV38	0.314155		TXN	P10599	38		SNX9	Q9Y5X1	0.409817
BPNT2	Q9NX62	3		CNTN1	Q12860	0.314098		EIF3F	O00303	38		EIF3E	P60228	0.409719
THBS4	P35443	3		COL4A1	P02462	0.31233		AP2M1	Q96CW1	38		COPE	O14579	0.409719
CCN1	O00622	3		ITIH3	Q06033	0.311764		RPL23	P62829	38		CCT6A	P40227	0.409524
CADM1	Q9BY67	3		CP	P00450	0.311481		USP15	Q9Y4E8	38		RPL24	P83731	0.409524
ZG16	O60844	3		CTSC	P53634	0.3112		FGFR2	P21802	38		PRPF4	O43172	0.409426
PSG9	Q00887	3		GC	P02774	0.310413		HSPA2	P54652	38		EIF4G2	P78344	0.409329
RNASE4	P34096	3		TFF1	P04155	0.310245		PSMB4	P28070	38		ZFR	Q96KR1	0.409232
PEG3	Q9GZU2	3		PEG3	Q9GZU2	0.310078		TFRC	P02786	37		PSMA5	P28066	0.409134
TFF1	P04155	3		RNASE4	P34096	0.30991		DNAJA1	P31689	37		RTRAF	Q9Y224	0.409134
GC	P02774	3		VPS36	Q86VN1	0.309798		CKAP5	Q14008	37		PDCD6IP	Q8WUM4	0.409134
CP	P00450	3		F10	P00742	0.309687		EIF2S1	P05198	37		SART3	Q15020	0.409037
CNTN1	Q12860	3		CREB3L2	Q70SY1	0.308908		KTN1	Q86UP2	37		SF3A3	Q12874	0.409037
F11	P03951	3		SERPINF2	P08697	0.308023		PRMT5	O14744	37		PSMD4	P55036	0.40894
MUC5AC	P98088	3		PSG9	Q00887	0.307968		FAU	P62861	37		ACIN1	Q9UKV3	0.40894
C1QTNF3	Q9BXJ4	3		PRC1	O43663	0.307582		PSMB5	P28074	37		COPG1	Q9Y678	0.40894
KRT80	Q6KB66	3		ZG16	O60844	0.307198		PRKCI	P41743	37		TUFM	P49411	0.40894
ADSS1	Q8N142	3		CADM1	Q9BY67	0.306924		RPS23	P62266	37		CALD1	Q05682	0.408745
NRP2	O60462	3		PZP	P20742	0.306759		PTPN1	P18031	37		EIF3D	O15371	0.408745
SPON1	Q9HCB6	2		CCDC80	Q76M96	0.306377		RPL38	P63173	37		GSTP1	P09211	0.408745
TGFBI	Q15582	2		CDH6	P55285	0.30605		OS9	Q13438	37		EIF3A	Q14152	0.408648
BIN2	Q9UBW5	2		CCN1	O00622	0.305289		MDC1	Q14676	37		HNRNPM	P52272	0.408357
AFM	P43652	2		FYB1	O15117	0.304209		PTPRK	Q15262	37		EIF3K	Q9UBQ5	0.40826
SERPIND1	P05546	2		POSTN	Q15063	0.304156		UBQLN1	Q9UMX0	37		RANGAP1	P46060	0.408163
AFP	P02771	2		KPLCE	Q5T750	0.301543		VCP	P55072	36		RPS3A	P61247	0.408066
CILP2	Q8IUL8	2		LECT2	O14960	0.301226		MAPK1	P28482	36		FAM120A	Q9NZB2	0.40797
AKR1C2	P52895	2		PTGR2	Q8N8N7	0.300857		SSR1	P43307	36		SNX2	O60749	0.407873
APOA4	P06727	2		CTSZ	Q9UBR2	0.300122		QARS1	P47897	36		EDC4	Q6P2E9	0.407776
ITIH1	P19827	2		PRUNE1	Q86TP1	0.299808		WDR77	Q9BQA1	36		RPL7	P18124	0.40768
MEAK7	Q6P9B6	2		MUC5B	Q9HC84	0.299808		TPX2	Q9ULW0	36		ATXN10	Q9UBB4	0.40768
PRUNE1	Q86TP1	2		THBS4	P35443	0.298611		RPL21	P46778	36		IPO9	Q96P70	0.407583
MUC5B	Q9HC84	2		MEAK7	Q6P9B6	0.298611		RPS17	P08708	36		CACYBP	Q9HB71	0.407486
CTSZ	Q9UBR2	2		APOA4	P06727	0.297321		KDM1A	O60341	36		UBR4	Q5T4S7	0.407486
LECT2	O14960	2		ITIH1	P19827	0.297321		ITSN1	Q15811	36		EIF2S3	P41091	0.407293
KPLCE	Q5T750	2		AKR1C2	P52895	0.297167		SNRPA1	P09661	36		NOP56	O00567	0.407293
POSTN	Q15063	2		CILP2	Q8IUL8	0.296961		POP1	Q99575	36		PRKCI	P41743	0.407197
FYB1	O15117	2		APOH	P02749	0.295685		MECP2	P51608	36		UBAP2	Q5T6F2	0.407197
PZP	P20742	2		AFP	P02771	0.295431		FTH1	P02794	36		BAIAP2L1	Q9UHR4	0.407197
CREB3L2	Q70SY1	2		BPNT2	Q9NX62	0.293917		SNRNP27	Q8WVK2	36		NOP2	P46087	0.407101
ANKMY2	Q8IV38	2		MAN1A2	O60476	0.293515		ARF4	P18085	35		PCMT1	P22061	0.407004
FABP7	O15540	2		ITIH5	Q86UX2	0.29207		DNAJA2	O60884	35		CNOT1	A5YKK6	0.407004
COL3A1	P02461	2		MIEN1	Q9BRT3	0.291921		CHMP4B	Q9H444	35		CCT3	P49368	0.406908
GALK1	P51570	2		STS	P08842	0.291723		ACIN1	Q9UKV3	35		GTF3C5	Q9Y5Q8	0.406908
PROS1	P07225	2		NDST1	P52848	0.291525		BCAP31	P51572	35		CAV1	Q03135	0.406812
C7	P10643	1		TNFRSF21	O75509	0.290835		NUDCD1	Q96RS6	35		EPB41L2	O43491	0.406812
FAP	Q12884	1		SERPINA7	P05543	0.288978		PAK1IP1	Q9NWT1	35		HEXIM1	O94992	0.406812
HPD	P32754	1		COL7A1	Q02388	0.288978		STX12	Q86Y82	35		MSH2	P43246	0.406812
ACAN	P16112	1		SERPIND1	P05546	0.285619		KNOP1	Q1ED39	35		DDX17	Q92841	0.406716
RCN3	Q96D15	1		SDK2	Q58EX2	0.284204		PRRC2C	Q9Y520	34		LARS1	Q9P2J5	0.406716
PTPRM	P28827	1		LRP11	Q86VZ4	0.281967		PUF60	Q9UHX1	34		METAP2	P50579	0.406427
RBP4	P02753	1		C5	P01031	0.281276		WDR5	P61964	34		RAB1A	P62820	0.406427
TSPAN9	O75954	1		AFM	P43652	0.278047		HNRNPM	P52272	34		TPX2	Q9ULW0	0.406331
IGFBP7	Q16270	1		ITIH4	Q14624	0.27733		PHB2	Q99623	34		TRIP13	Q15645	0.406235
ITIH4	Q14624	1		PUS1	Q9Y606	0.276572		DHX36	Q9H2U1	34		PRP4K	Q13523	0.406139
SERPINA7	P05543	1		BIN2	Q9UBW5	0.276305		MYO1C	O00159	34		IGF2BP1	Q9NZI8	0.406139
COL7A1	Q02388	1		IGFBP7	Q16270	0.275862		RIF1	Q5UIP0	34		RPS23	P62266	0.405948
TNFRSF21	O75509	1		TSPAN9	O75954	0.275553		ESYT1	Q9BSJ8	33		TRAP1	Q12931	0.405948
MIEN1	Q9BRT3	1		TGFBI	Q15582	0.27476		ATP1A1	P05023	33		DNMT1	P26358	0.405948
ITIH5	Q86UX2	1		RBP4	P02753	0.274191		CTNND1	O60716	33		USP15	Q9Y4E8	0.405852
PTGR2	Q8N8N7	1		IRF2BPL	Q9H1B7	0.269297		ATP5F1A	P25705	33		RAE1	P78406	0.405756
CDH6	P55285	1		SPON1	Q9HCB6	0.259779		EMD	P50402	33		PSMD11	O00231	0.40566
CCDC80	Q76M96	1		CPQ	Q9Y646	0.256563		BSG	P35613	33		PRPF8	Q6P2Q9	0.40566
VPS36	Q86VN1	1		PTPRM	P28827	0.25542		XRN2	Q9H0D6	33		SEC22B	O75396	0.405565
ITIH3	Q06033	1		RCN3	Q96D15	0.239922		ITGB1	P05556	33		BANF1	O75531	0.405565
COL11A1	P12107	1		ACAN	P16112	0.234588		APPL1	Q9UKG1	33		EPHA7	Q15375	0.405278
MST1	P26927	1		HPD	P32754	0.233062		TRAP1	Q12931	33		KIF5B	P33176	0.405278
SLC29A2	Q14542	1		FAP	Q12884	0.221023		PDIA4	P13667	33		DYNC1LI1	Q9Y6G9	0.405278
SPARCL1	Q14515	1		C7	P10643	0.219556		SQSTM1	Q13501	33		HCFC1	P51610	0.405183
CEACAM1	P13688	N/A		CEACAM1	P13688	N/A		HLA-A	P04439	33		PRKAR2A	P13861	0.405087
CEACAM5	P06731	N/A		CEACAM5	P06731	N/A		EFNB1	P98172	33		CHERP	Q8IWX8	0.404896
CRISPLD2	Q9H0B8	N/A		CRISPLD2	Q9H0B8	N/A		CDC73	Q6P1J9	33		HMGA1	P17096	0.404801
VNN1	O95497	N/A		VNN1	O95497	N/A		PSMA3	P25788	33		ERP29	P30040	0.404801
GPX3	P22352	N/A		GPX3	P22352	N/A		LUC7L	Q9NQ29	33		SRP14	P37108	0.404706
TCEAL3	Q969E4	N/A		TCEAL3	Q969E4	N/A		YTHDC1	Q96MU7	33		KHDRBS1	Q07666	0.404706
GALNT3	Q14435	N/A		GALNT3	Q14435	N/A		CDK7	P50613	33		LMNB1	P20700	0.404611
RGN	Q15493	N/A		RGN	Q15493	N/A		HSPA4	P34932	32		ACTN1	P12814	0.404325
SHBG	P04278	N/A		SHBG	P04278	N/A		SSBP1	Q04837	32		EPB41L1	Q9H4G0	0.404325
PCDHB8	Q9UN66	N/A		PCDHB8	Q9UN66	N/A		SCFD1	Q8WVM8	32		SEC13	P55735	0.40423
ACSS2	Q9NR19	N/A		ACSS2	Q9NR19	N/A		ACTN4	O43707	32		STUB1	Q9UNE7	0.404135
ENPP2	Q13822	N/A		ENPP2	Q13822	N/A		SMC3	Q9UQE7	32		EIF3M	Q7L2H7	0.40404
ENPEP	Q07075	N/A		ENPEP	Q07075	N/A		HNRNPUL1	Q9BUJ2	32		PDIA4	P13667	0.40404
CRIM1	Q9NZV1	N/A		CRIM1	Q9NZV1	N/A		SF3A3	Q12874	32		RNF40	O75150	0.40404
PGLYRP2	Q96PD5	N/A		PGLYRP2	Q96PD5	N/A		POLR2B	P30876	32		TMPO	P42166	0.403851
LY6G6C	O95867	N/A		LY6G6C	O95867	N/A		RBM17	Q96I25	32		DCTN1	Q14203	0.403472
PGF	P49763	N/A		PGF	P49763	N/A		CDH1	P12830	32		TCP1	P17987	0.403472
								RHOG	P84095	32		SF3B6	Q9Y3B4	0.403472
								SYNPO	Q8N3V7	32		C7orf50	Q9BRJ6	0.403283
								GANAB	Q14697	31		PTPN1	P18031	0.403283
								STAT1	P42224	31		CDK5RAP3	Q96JB5	0.403283
								MCM6	Q14566	31		LDHA	P00338	0.403283
								IARS1	P41252	31		CCT4	P50991	0.403188
								EPS15	P42566	31		TYRO3	Q06418	0.403094
								NSF	P46459	31		EIF2AK2	P19525	0.403094
								MACROH2A1	O75367	31		SART1	O43290	0.402999
								RTRAF	Q9Y224	31		PRDX3	P30048	0.402999
								EPB41L2	O43491	31		TPI1	P60174	0.402999
								EIF3J	O75822	31		EEA1	Q15075	0.402905
								TMX1	Q9H3N1	31		ARCN1	P48444	0.402905
								SORT1	Q99523	31		BOP1	Q14137	0.40281
								ADAM10	O14672	31		SUPT5H	O00267	0.402716
								DYNLL2	Q96FJ2	31		EXOSC9	Q06265	0.402622
								ABRAXAS2	Q15018	31		PSMC3	P17980	0.402527
								FLOT1	O75955	30		FLNB	O75369	0.402527
								PDIA6	Q15084	30		GSPT1	P15170	0.402339
								CALR	P27797	30		SCARB2	Q14108	0.402339
								HDLBP	Q00341	30		RPL21	P46778	0.402339
								CDKN2AIP	Q9NXV6	30		CTPS1	P17812	0.402245
								TPM3	P06753	30		WFS1	O76024	0.402151
								SMC1A	Q14683	30		FKBP5	Q13451	0.402151
								RANGAP1	P46060	30		SQSTM1	Q13501	0.402151
								STUB1	Q9UNE7	30		RCC1	P18754	0.402151
								RNF40	O75150	30		RPA2	P15927	0.402151
								BOP1	Q14137	30		PAK1	Q13153	0.402057
								RPS21	P63220	30		PRKACA	P17612	0.402057
								EIF2S2	P20042	30		RPS17	P08708	0.401963
								RAB2A	P61019	30		ACTR1A	P61163	0.401963
								PRRC2B	Q5JSZ5	30		RPL38	P63173	0.401588
								ECH1	Q13011	30		DARS1	P14868	0.401588
								CLTB	P09497	30		POLR2B	P30876	0.4014
								DAG1	Q14118	30		NCKAP1	Q9Y2A7	0.401307
								MAD2L1	Q13257	30		EIF3H	O15372	0.401119
								STRN3	Q13033	30		RBM25	P49756	0.401119
								LRRC59	Q96AG4	29		ATP6AP2	O75787	0.401026
								LGALS3BP	Q08380	29		RPS21	P63220	0.401026
								MAP4K4	O95819	29		KPNA2	P52292	0.400932
								CACYBP	Q9HB71	29		RPA1	P27694	0.400932
								SF3B6	Q9Y3B4	29		RNF20	Q5VTR2	0.400932
								ABI1	Q8IZP0	29		PSMA6	P60900	0.400839
								IPO7	O95373	29		PHB2	Q99623	0.400839
								PURA	Q00577	29		DDX27	Q96GQ7	0.400746
								KPNA3	O00505	29		ADAR	P55265	0.400746
								POLR2A	P24928	29		LSM12	Q3MHD2	0.400559
								EHMT2	Q96KQ7	29		MYH10	P35580	0.400559
								RPL34	P49207	29		RBM17	Q96I25	0.400466
								ROR1	Q01973	29		COPG2	Q9UBF2	0.400186
								PSMA4	P25789	29		USP32	Q8NFA0	0.400186
								PSMB6	P28072	29		KDM1A	O60341	0.4
								TLN1	Q9Y490	28		ABI1	Q8IZP0	0.399907
								EPRS1	P07814	28		HLA-A	P04439	0.399814
								TUBB6	Q9BUF5	28		ZFYVE16	Q7Z3T8	0.399721
								EIF4G2	P78344	28		EIF2S2	P20042	0.399628
								COPG1	Q9Y678	28		EFNB1	P98172	0.399257
								ACTN1	P12814	28		PSMD6	Q15008	0.399165
								EEA1	Q15075	28		RPL18A	Q02543	0.398702
								RCC1	P18754	28		IGF2R	P11717	0.398702
								CASC3	O15234	28		PSMD3	O43242	0.39861
								KPNA4	O00629	28		DHX36	Q9H2U1	0.398517
								ERP44	Q9BS26	28		CDC73	Q6P1J9	0.398517
								TMOD3	Q9NYL9	28		DCTN2	Q13561	0.398517
								SH3BGRL	O75368	28		BYSL	Q13895	0.398333
								SEC23A	Q15436	27		FGFR2	P21802	0.398333
								PICALM	Q13492	27		RAB2A	P61019	0.39824
								AP2A1	O95782	27		NASP	P49321	0.398148
								SLC25A3	Q00325	27		SF3A2	Q15428	0.398056
								PCMT1	P22061	27		TKT	P29401	0.398056
								KHDRBS1	Q07666	27		GLUD1	P00367	0.397964
								TSNAX	Q99598	27		EPHA2	P29317	0.39778
								EIF2B5	Q13144	27		TPP2	P29144	0.397688
								BAG3	O95817	27		PSMD14	O00487	0.397596
								STOM	P27105	27		ITSN1	Q15811	0.397596
								TWF1	Q12792	27		IPO7	O95373	0.397596
								PPM1H	Q9ULR3	27		HK2	P52789	0.397596
								ANKRD28	O15084	27		GBA1	P04062	0.397504
								RAB14	P61106	27		ZCCHC8	Q6NZY4	0.397412
								RRP15	Q9Y3B9	27		RPAP3	Q9H6T3	0.397412
								RO60	P10155	27		XPOT	O43592	0.397229
								UBLCP1	Q8WVY7	27		PURA	Q00577	0.397137
								SEC23B	Q15437	26		SUGT1	Q9Y2Z0	0.397045
								ENO1	P06733	26		HUWE1	Q7Z6Z7	0.397045
								RRBP1	Q9P2E9	26		KPNA3	O00505	0.396954
								VDAC2	P45880	26		CDH1	P12830	0.396862
								GCN1	Q92616	26		AFDN	P55196	0.396862
								DDX17	Q92841	26		SDCBP	O00560	0.396679
								TRIP13	Q15645	26		USO1	O60763	0.396679
								HCFC1	P51610	26		PSMC4	P43686	0.396588
								EXOSC9	Q06265	26		RHOG	P84095	0.396588
								RPA2	P15927	26		CHD4	Q14839	0.396588
								ACTR1A	P61163	26		GLRX3	O76003	0.396588
								DARS1	P14868	26		YLPM1	P49750	0.396496
								RBM25	P49756	26		ERBIN	Q96RT1	0.396496
								CHD4	Q14839	26		LANCL1	O43813	0.396496
								YLPM1	P49750	26		PSMB2	P49721	0.396405
								GSN	P06396	26		PRKCSH	P14314	0.396222
								IK	Q13123	26		PSME2	Q9UL46	0.39604
								UBE2V1	Q13404	26		MYL6	P60660	0.395857
								LSM4	Q9Y4Z0	26		PSMA3	P25788	0.395766
								STX7	O15400	26		TSNAX	Q99598	0.395766
								PIN1	Q13526	26		PTPN23	Q9H3S7	0.395766
								CLIP1	P30622	26		BCAP31	P51572	0.395584
								PDLIM7	Q9NR12	26		PTPN6	P29350	0.395493
								STK24	Q9Y6E0	26		ELOB	Q15370	0.395493
								NPTN	Q9Y639	26		GARS1	P41250	0.395402
								PSMD8	P48556	26		VCL	P18206	0.395221
								EIF4E	P06730	26		OS9	Q13438	0.39513
								TMEM59	Q9BXS4	26		TPM4	P67936	0.39513
								SLC3A2	P08195	25		DSC2	Q02487	0.39513
								ACBD3	Q9H3P7	25		RCN2	Q14257	0.395039
								UBAP2	Q5T6F2	25		TAGLN2	P37802	0.395039
								HEXIM1	O94992	25		IMPDH2	P12268	0.394948
								SEC22B	O75396	25		ATP2B1	P20020	0.394858
								KIF5B	P33176	25		LUC7L	Q9NQ29	0.394586
								ADAR	P55265	25		ACO2	Q99798	0.394586
								GLUD1	P00367	25		EIF2B5	Q13144	0.394405
								ATP1B3	P54709	25		ATP1B3	P54709	0.394315
								POLR1C	O15160	25		SYNE2	Q8WXH0	0.394315
								H1-0	P07305	25		DHX29	Q7Z478	0.394224
								PTPN12	Q05209	25		XPO5	Q9HAV4	0.394224
								RPRD1B	Q9NQG5	25		EIF2B1	Q14232	0.394134
								NAPA	P54920	25		SCAF11	Q99590	0.394134
								B3GNT2	Q9NY97	25		MDN1	Q9NU22	0.393953
								EIF4A2	Q14240	25		SYNPO	Q8N3V7	0.393863
								PPP4C	P60510	25		POLR1C	O15160	0.393863
								CIAO1	O76071	25		STRBP	Q96SI9	0.393773
								CLNS1A	P54105	25		PDS5A	Q29RF7	0.393773
								GOLM1	Q8NBJ4	25		PRRC2B	Q5JSZ5	0.393683
								TMED2	Q15363	25		SNRPA1	P09661	0.393593
								PSMD10	O75832	25		ZMYND8	Q9ULU4	0.393593
								PSMD5	Q16401	25		CKB	P12277	0.393503
								PSMD9	O00233	25		TMED10	P49755	0.393413
								COPB1	P53618	24		CASC3	O15234	0.393413
								AP1B1	Q10567	24		GSN	P06396	0.393413
								SNX9	Q9Y5X1	24		ARHGDIA	P52565	0.393413
								PDCD6IP	Q8WUM4	24		POP1	Q99575	0.393323
								TUFM	P49411	24		SLK	Q9H2G2	0.393323
								BAIAP2L1	Q9UHR4	24		LRBA	P50851	0.393323
								GTF3C5	Q9Y5Q8	24		LMNB2	Q03252	0.393233
								RAE1	P78406	24		IK	Q13123	0.393143
								BANF1	O75531	24		AP1M1	Q9BXS5	0.393053
								SEC13	P55735	24		MDH2	P40926	0.392963
								ARCN1	P48444	24		TNPO1	Q92973	0.392694
								PRKACA	P17612	24		EIF3J	O75822	0.392515
								RPA1	P27694	24		POLR2A	P24928	0.392515
								COPG2	Q9UBF2	24		BAG3	O95817	0.392515
								DCTN2	Q13561	24		RBM27	Q9P2N5	0.392336
								ZCCHC8	Q6NZY4	24		CS	O75390	0.392336
								RPAP3	Q9H6T3	24		MDC1	Q14676	0.392246
								SUGT1	Q9Y2Z0	24		KPNA4	O00629	0.392067
								PTPN23	Q9H3S7	24		PSMB3	P49720	0.391889
								DHX29	Q7Z478	24		RCN1	Q15293	0.391889
								EIF2B1	Q14232	24		TSC22D1	Q15714	0.3918
								STRBP	Q96SI9	24		NELFA	Q9H3P2	0.3918
								TNPO1	Q92973	24		ACP2	P11117	0.3918
								VANGL1	Q8TAA9	24		ERP44	Q9BS26	0.39171
								USP10	Q14694	24		STOM	P27105	0.391532
								STRN	O43815	24		H1-0	P07305	0.391532
								PPIB	P23284	24		RNF2	Q99496	0.391532
								UBE2O	Q9C0C9	24		COPS4	Q9BT78	0.391443
								SCYL1	Q96KG9	24		ETFB	P38117	0.391443
								TPR	P12270	23		TWF1	Q12792	0.391354
								DSP	P15924	23		TIA1	P31483	0.391354
								CSE1L	P55060	23		EHMT2	Q96KQ7	0.391265
								TOR1AIP1	Q5JTV8	23		PTPN12	Q05209	0.391265
								EDC4	Q6P2E9	23		ANXA5	P08758	0.391176
								LARS1	Q9P2J5	23		DNAJC7	Q99615	0.391176
								DYNC1LI1	Q9Y6G9	23		SLC7A5	Q01650	0.391176
								EPB41L1	Q9H4G0	23		PSMC1	P62191	0.391087
								CDK5RAP3	Q96JB5	23		RPL34	P49207	0.391087
								PRDX3	P30048	23		SCAMP3	O14828	0.390909
								PDS5A	Q29RF7	23		EIF2B3	Q9NR50	0.39082
								PHF3	Q92576	23		PWP1	Q13610	0.390643
								GATAD2A	Q86YP4	23		SH3GL1	Q99961	0.390554
								TOP2B	Q02880	23		NECTIN2	Q92692	0.390377
								SUPT6H	Q7KZ85	23		PHF3	Q92576	0.3902
								COPS3	Q9UNS2	23		YTHDC1	Q96MU7	0.390023
								GXYLT1	Q4G148	23		GATAD2A	Q86YP4	0.390023
								SREK1	Q8WXA9	23		SDF4	Q9BRK5	0.389934
								SAAL1	Q96ER3	23		TOP2B	Q02880	0.389846
								PFDN5	Q99471	23		PRDX6	P30041	0.389758
								GABPA	Q06546	23		PTPRK	Q15262	0.389581
								ACLY	P53396	22		ECH1	Q13011	0.389581
								IPO9	Q96P70	22		SMARCC1	Q92922	0.389581
								CNOT1	A5YKK6	22		RPRD1B	Q9NQG5	0.389493
								LDHA	P00338	22		EML4	Q9HC35	0.389493
								USP32	Q8NFA0	22		GPS1	Q13098	0.389405
								GBA1	P04062	22		CYFIP2	Q96F07	0.389316
								ERBIN	Q96RT1	22		ZC3H4	Q9UPT8	0.389228
								PSME2	Q9UL46	22		UBE2V1	Q13404	0.38914
								SCAF11	Q99590	22		PGAM1	P18669	0.38914
								SLK	Q9H2G2	22		TMOD3	Q9NYL9	0.388964
								RBM27	Q9P2N5	22		AP3D1	O14617	0.388964
								NELFA	Q9H3P2	22		MARS1	P56192	0.388788
								ZC3H4	Q9UPT8	22		NUDCD1	Q96RS6	0.388613
								OXSR1	O95747	22		RABEP1	Q15276	0.388613
								SNU13	P55769	22		VANGL1	Q8TAA9	0.388525
								ZNF622	Q969S3	22		MYCBP	Q99417	0.388525
								RNF149	Q8NC42	22		MARK3	P27448	0.388437
								PPIE	Q9UNP9	22		MYO1C	O00159	0.388262
								PLOD3	O60568	22		CBS	P35520	0.388262
								SRP54	P61011	22		ATP6V1H	Q9UI12	0.388174
								CDC40	O60508	22		CLTB	P09497	0.387999
								PPIL1	Q9Y3C6	22		OXSR1	O95747	0.387999
								REEP5	Q00765	22		SNU13	P55769	0.387824
								WDR48	Q8TAF3	22		PSMD13	Q9UNM6	0.387737
								RAB8A	P61006	22		UBQLN1	Q9UMX0	0.387562
								GSTP1	P09211	21		PDAP1	Q13442	0.387562
								SNX2	O60749	21		MAGED2	Q9UNF1	0.387387
								DNMT1	P26358	21		CD44	P16070	0.3873
								PRKAR2A	P13861	21		IST1	P53990	0.3873
								NCKAP1	Q9Y2A7	21		PSMD7	P51665	0.387126
								RNF20	Q5VTR2	21		ZNF622	Q969S3	0.387039
								AFDN	P55196	21		TMX1	Q9H3N1	0.386865
								ELOB	Q15370	21		AP2A2	O94973	0.386865
								VCL	P18206	21		PFKL	P17858	0.386865
								RCN1	Q15293	21		IARS2	Q9NSE4	0.386778
								COPS4	Q9BT78	21		ATP6V1B2	P21281	0.386691
								CYFIP2	Q96F07	21		DIAPH1	O60610	0.386691
								MINK1	Q8N4C8	21		SUPT6H	Q7KZ85	0.386604
								ARPC4	P59998	21		SORT1	Q99523	0.386517
								MTA3	Q9BTC8	21		PPM1H	Q9ULR3	0.386517
								AAK1	Q2M2I8	21		LAMC1	P11047	0.386517
								CCNB1	P14635	21		SMC4	Q9NTJ3	0.38643
								PDE6D	O43924	21		RIF1	Q5UIP0	0.386343
								TGFB1	P01137	21		CDK7	P50613	0.386343
								UBA5	Q9GZZ9	21		ROR1	Q01973	0.386343
								LSM2	Q9Y333	21		RAB11FIP1	Q6WKZ4	0.386256
								PKN2	Q16513	21		LSM4	Q9Y4Z0	0.385737
								FHL2	Q14192	21		NELFE	P18615	0.385737
								TSPAN6	O43657	21		INF2	Q27J81	0.385737
								EXOC1	Q9NV70	21		QDPR	P09417	0.385737
								BASP1	P80723	20		EIF3L	Q9Y262	0.38565
								PFKP	Q01813	20		ARPC5	O15511	0.385564
								UBR4	Q5T4S7	20		PDCD6	O75340	0.385477
								TMPO	P42166	20		COPS2	P61201	0.385391
								LSM12	Q3MHD2	20		EHD1	Q9H4M9	0.385391
								NASP	P49321	20		SMARCA2	P51531	0.385305
								USO1	O60763	20		COBLL1	Q53SF7	0.385218
								TPM4	P67936	20		TRIM33	Q9UPN9	0.385046
								IMPDH2	P12268	20		MAPK14	Q16539	0.384874
								ZMYND8	Q9ULU4	20		SNX6	Q9UNH7	0.384874
								RNF2	Q99496	20		ANKRD28	O15084	0.384615
								SMARCC1	Q92922	20		PLCD3	Q8N3E9	0.384615
								MARS1	P56192	20		TBC1D15	Q8TC07	0.384529
								RABEP1	Q15276	20		FAF1	Q9UNN5	0.384358
								ATP6V1H	Q9UI12	20		EPHA1	P21709	0.384272
								CD44	P16070	20		HSD17B4	P51659	0.384272
								ATP6V1B2	P21281	20		TES	Q9UGI8	0.384186
								NELFE	P18615	20		TWF2	Q6IBS0	0.3841
								INF2	Q27J81	20		RAB14	P61106	0.384014
								COPS2	P61201	20		HSPA2	P54652	0.383929
								SMARCA2	P51531	20		ANXA11	P50995	0.383929
								MAPK14	Q16539	20		DAG1	Q14118	0.383757
								DLG1	Q12959	20		KLK10	O43240	0.383672
								ARFGAP1	Q8N6T3	20		EPHA4	P54764	0.383672
								PDCD4	Q53EL6	20		PSMA2	P25787	0.383501
								HSPBP1	Q9NZL4	20		ADD1	P35611	0.383501
								OSGEP	Q9NPF4	20		EIF5B	O60841	0.383415
								MOB4	Q9Y3A3	20		DEK	P35659	0.383415
								TOLLIP	Q9H0E2	20		PAK1IP1	Q9NWT1	0.383159
								PPP4R3A	Q6IN85	20		YKT6	O15498	0.383159
								KLK6	Q92876	20		NIBAN2	Q96TA1	0.383073
								CETN2	P41208	20		DLG1	Q12959	0.382988
								ATN1	P54259	20		PDCD5	O14737	0.382818
								NUP210	Q8TEM1	19		NMD3	Q96D46	0.382818
								MACF1	Q9UPN3	19		PLIN3	O60664	0.382733
								ATXN10	Q9UBB4	19		MAD2L1	Q13257	0.382307
								MSH2	P43246	19		PPIH	O43447	0.382222
								FLNB	O75369	19		RRP15	Q9Y3B9	0.382137
								GLRX3	O76003	19		ARFGAP1	Q8N6T3	0.382137
								ARHGDIA	P52565	19		DNAJC2	Q99543	0.382052
								ANXA5	P08758	19		STX12	Q86Y82	0.382052
								SH3GL1	Q99961	19		CCDC6	Q16204	0.382052
								MARK3	P27448	19		TRIOBP	Q9H2D6	0.382052
								IST1	P53990	19		RO60	P10155	0.381968
								PDCD6	O75340	19		NAPA	P54920	0.381883
								TRIM33	Q9UPN9	19		MINK1	Q8N4C8	0.381798
								PLCD3	Q8N3E9	19		ARPC4	P59998	0.381713
								FAF1	Q9UNN5	19		DIP2B	Q9P265	0.381629
								EIF5B	O60841	19		PSMB4	P28070	0.381544
								NHSL3	Q9P206	19		RMDN3	Q96TC7	0.381544
								RAB18	Q9NP72	19		GART	P22102	0.381544
								PAIP1	Q9H074	19		NHSL3	Q9P206	0.381459
								AKAP12	Q02952	19		CDC42EP4	Q9H3Q1	0.381459
								CKMT1B	P12532	19		COPS3	Q9UNS2	0.381375
								KRT16	P08779	19		ETF1	P62495	0.381121
								SCAMP2	O15127	19		ENG	P17813	0.380868
								MMP2	P08253	19		CWC15	Q9P013	0.380784
								CHMP1A	Q9HD42	19		STX7	O15400	0.380615
								PVR	P15151	19		GNAI3	P08754	0.380615
								RAD23B	P54727	19		UBE2K	P61086	0.380447
								CYCS	P99999	19		AGL	P35573	0.380447
								PPP6C	O00743	19		ADAM10	O14672	0.380279
								EXOSC2	Q13868	19		NSDHL	Q15738	0.380195
								PPP4R2	Q9NY27	19		NEK9	Q8TD19	0.38011
								NSMAF	Q92636	19		OAT	P04181	0.380027
								SLC16A1	P53985	18		ARHGAP1	Q07960	0.380027
								XPOT	O43592	18		PSMA4	P25789	0.379607
								GARS1	P41250	18		PIN1	Q13526	0.379607
								SYNE2	Q8WXH0	18		ARL8B	Q9NVJ2	0.379523
								XPO5	Q9HAV4	18		DYNLL2	Q96FJ2	0.37944
								DNAJC7	Q99615	18		ITGAV	P06756	0.379356
								GPS1	Q13098	18		USP10	Q14694	0.379105
								CBS	P35520	18		HEXB	P07686	0.379105
								AP2A2	O94973	18		RALA	P11233	0.379105
								SNX6	Q9UNH7	18		FUCA2	Q9BTY2	0.379105
								HSD17B4	P51659	18		NAMPT	P43490	0.378938
								PDCD5	O14737	18		KRT6A	P02538	0.378771
								NEK9	Q8TD19	18		PSMB6	P28072	0.378604
								ITGAV	P06756	18		MECP2	P51608	0.378355
								EXOSC8	Q96B26	18		B3GNT2	Q9NY97	0.378355
								B3GNT3	Q9Y2A9	18		LMAN1	P49257	0.378355
								PRPSAP2	O60256	18		DDX39A	O00148	0.378271
								EGFL7	Q9UHF1	18		EIF4A2	Q14240	0.378188
								ATP2B4	P23634	18		MTA3	Q9BTC8	0.378105
								NHERF2	Q15599	18		ALDH2	P05091	0.378105
								MPG	P29372	18		BOD1L1	Q8NFC6	0.378105
								APOE	P02649	18		EXOSC8	Q96B26	0.377939
								ARSA	P15289	18		AAK1	Q2M2I8	0.377856
								ERP29	P30040	17		RAB18	Q9NP72	0.377856
								CTPS1	P17812	17		LAMB2	P55268	0.377856
								MYH10	P35580	17		KIAA0319L	Q8IZA0	0.377856
								HK2	P52789	17		FTH1	P02794	0.37769
								LMNB2	Q03252	17		DNASE1L1	P49184	0.377441
								SCAMP3	O14828	17		C3	P01024	0.377358
								EIF2B3	Q9NR50	17		TPM1	P09493	0.377276
								SDF4	Q9BRK5	17		SKIC3	Q6PGP7	0.377193
								PRDX6	P30041	17		DFFA	O00273	0.377193
								PFKL	P17858	17		PAIP1	Q9H074	0.376945
								TWF2	Q6IBS0	17		AKAP12	Q02952	0.376862
								YKT6	O15498	17		HIP1R	O75146	0.37678
								CCDC6	Q16204	17		EPN1	Q9Y6I3	0.376697
								RMDN3	Q96TC7	17		KAT7	O95251	0.376697
								SRSF2	Q01130	17		SLC12A2	P55011	0.376697
								NELFCD	Q8IXH7	17		PRMT3	O60678	0.376615
								CTBP2	P56545	17		CCNB1	P14635	0.37645
								THOC2	Q8NI27	17		USP19	O94966	0.376368
								CAPN1	P07384	17		SH3BGRL	O75368	0.376285
								GOLGB1	Q14789	17		PDE6D	O43924	0.376285
								LAMB1	P07942	17		PDCD4	Q53EL6	0.376285
								DDAH2	O95865	17		TBC1D10B	Q4KMP7	0.376285
								CAPN2	P17655	17		ITCH	Q96J02	0.376285
								PFDN2	Q9UHV9	17		CKMT1B	P12532	0.376203
								LAMA5	O15230	17		ABCF1	Q8NE71	0.376203
								LSM3	P62310	17		POR	P16435	0.376121
								FNTB	P49356	17		CMBL	Q96DG6	0.376121
								COL6A2	P12110	17		COLGALT1	Q8NBJ5	0.376121
								PRKCSH	P14314	16		B3GNT3	Q9Y2A9	0.376038
								MYL6	P60660	16		CNP	P09543	0.376038
								RCN2	Q14257	16		PRPSAP2	O60256	0.375956
								TAGLN2	P37802	16		FERMT2	Q96AC1	0.375956
								CS	O75390	16		PPP4C	P60510	0.375874
								PWP1	Q13610	16		RNF149	Q8NC42	0.375874
								MYCBP	Q99417	16		BPTF	Q12830	0.375874
								LAMC1	P11047	16		DCLK1	O15075	0.375874
								ARPC5	O15511	16		SRSF2	Q01130	0.375792
								TBC1D15	Q8TC07	16		RNF113A	O15541	0.375792
								ANXA11	P50995	16		FABP5	Q01469	0.37571
								PPIH	O43447	16		LRPAP1	P30533	0.375546
								LAMB2	P55268	16		CLIP1	P30622	0.375464
								TPM1	P09493	16		CIAO1	O76071	0.375464
								BPTF	Q12830	16		UTRN	P46939	0.375464
								MAVS	Q7Z434	16		KRT16	P08779	0.375218
								SEPTIN2	Q15019	16		RRM2	P31350	0.375055
								NRBP1	Q9UHY1	16		MAVS	Q7Z434	0.374973
								PRKCD	Q05655	16		PSMG3	Q9BT73	0.374809
								WBP11	Q9Y2W2	16		PPIE	Q9UNP9	0.374728
								RAD21	O60216	16		CLNS1A	P54105	0.374401
								CPD	O75976	16		ITGA3	P26006	0.374401
								RAD23A	P54725	16		GRSF1	Q12849	0.37432
								ITGA5	P08648	16		PLOD3	O60568	0.374157
								EPS15L1	Q9UBC2	16		PIP4K2C	Q8TBX8	0.374157
								CALCOCO2	Q13137	16		RAB10	P61026	0.374076
								CNPY3	Q9BT09	16		KRT17	Q04695	0.373994
								GRIPAP1	Q4V328	16		EGFL7	Q9UHF1	0.373832
								EIF2B4	Q9UI10	16		MDH1	P40925	0.373751
								PPP1R8	Q12972	16		SNAP23	O00161	0.373669
								ZG16B	Q96DA0	16		GOLM1	Q8NBJ4	0.373426
								STAG2	Q8N3U4	16		UCHL5	Q9Y5K5	0.373183
								EXOSC7	Q15024	16		GPC4	O75487	0.373183
								LLGL2	Q6P1M3	16		TGFB1	P01137	0.373021
								FAM234A	Q9H0X4	16		UBLCP1	Q8WVY7	0.37294
								FBLN5	Q9UBX5	16		SEPTIN2	Q15019	0.37294
								MANSC1	Q9H8J5	16		CPSF3	Q9UKF6	0.37294
								TACSTD2	P09758	16		CCDC22	O60826	0.372779
								TPI1	P60174	15		STRN	O43815	0.372698
								TKT	P29401	15		ANP32E	Q9BTT0	0.372698
								HUWE1	Q7Z6Z7	15		NRBP1	Q9UHY1	0.372375
								CKB	P12277	15		SRP54	P61011	0.372294
								LRBA	P50851	15		SCAMP2	O15127	0.372294
								AP1M1	Q9BXS5	15		PRKCD	Q05655	0.371892
								MDH2	P40926	15		ATRN	O75882	0.371892
								TIA1	P31483	15		PDLIM7	Q9NR12	0.371731
								EML4	Q9HC35	15		ERBB4	Q15303	0.371731
								TRIOBP	Q9H2D6	15		AMPD2	Q01433	0.371731
								CWC15	Q9P013	15		HAL	P42357	0.371651
								LMAN1	P49257	15		WASF2	Q9Y6W5	0.371571
								DDX39A	O00148	15		CALML5	Q9NZT1	0.371571
								ALDH2	P05091	15		ACTN2	P35609	0.37149
								HIP1R	O75146	15		NCAPD2	Q15021	0.37149
								DCLK1	O15075	15		MYOF	Q9NZM1	0.37149
								UTRN	P46939	15		VAT1	Q99536	0.37125
								PSMG3	Q9BT73	15		KRT13	P13646	0.37117
								RAB10	P61026	15		UBA5	Q9GZZ9	0.371009
								CCDC22	O60826	15		CC2D1A	Q6P1N0	0.37077
								ERBB4	Q15303	15		DENR	O43583	0.37069
								ACTN2	P35609	15		LSM2	Q9Y333	0.37053
								HIP1	O00291	15		ALCAM	Q13740	0.37045
								PPP5C	P53041	15		SGSH	P51688	0.370291
								OCLN	Q16625	15		HSPBP1	Q9NZL4	0.370211
								SEPTIN8	Q92599	15		PACSIN2	Q9UNF0	0.370211
								RBBP6	Q7Z6E9	15		PTK7	Q13308	0.370211
								ITGB5	P18084	15		GAN	Q9H2C0	0.370211
								NAPG	Q99747	15		GXYLT1	Q4G148	0.370131
								PLSCR1	O15162	15		TACC2	O95359	0.370052
								WRAP53	Q9BUR4	15		KRT6B	P04259	0.369972
								PLA2G10	O15496	15		CDC40	O60508	0.369892
								ZFYVE16	Q7Z3T8	14		PTPRJ	Q12913	0.369892
								TPP2	P29144	14		STK24	Q9Y6E0	0.369733
								DSC2	Q02487	14		WBP11	Q9Y2W2	0.369733
								MDN1	Q9NU22	14		NELFCD	Q8IXH7	0.369575
								ACP2	P11117	14		CHST12	Q9NRB3	0.369495
								SLC7A5	Q01650	14		WDR44	Q5JSH3	0.369495
								AP3D1	O14617	14		FAM83B	Q5T0W9	0.369257
								UBE2K	P61086	14		GLB1	P16278	0.369178
								NSDHL	Q15738	14		MRE11	P49959	0.369099
								OAT	P04181	14		NPTN	Q9Y639	0.368861
								ARL8B	Q9NVJ2	14		MMP2	P08253	0.368861
								KRT6A	P02538	14		PYCR3	Q53H96	0.368782
								C3	P01024	14		DBR1	Q9UK59	0.368782
								EPN1	Q9Y6I3	14		SNRNP27	Q8WVK2	0.368703
								LRPAP1	P30533	14		ATP2B4	P23634	0.368703
								WASF2	Q9Y6W5	14		PKN2	Q16513	0.368545
								SGSH	P51688	14		RAD21	O60216	0.368545
								PACSIN2	Q9UNF0	14		NEDD4L	Q96PU5	0.368545
								PTPRJ	Q12913	14		ABRAXAS2	Q15018	0.368466
								PYCR3	Q53H96	14		CPD	O75976	0.36823
								CTSH	P09668	14		UBQLN2	Q9UHD9	0.368072
								GPI	P06744	14		ZC3H15	Q8WU90	0.367993
								SUMO2	P61956	14		PSMD8	P48556	0.367914
								DNAAF10	Q96MX6	14		TMED2	Q15363	0.367914
								LGALS7B	P47929	14		CTBP2	P56545	0.367914
								THOC3	Q96J01	14		POLR1G	O15446	0.367678
								SHOC2	Q9UQ13	14		PPIL1	Q9Y3C6	0.3676
								UPF2	Q9HAU5	14		TMED9	Q9BVK6	0.367443
								SERPINA3	P01011	14		LGR4	Q9BXB1	0.367286
								GALNS	P34059	14		PLXNA3	P51805	0.367208
								NUP58	Q9BVL2	14		CD59	P13987	0.367208
								CRELD2	Q6UXH1	14		ROCK2	O75116	0.367208
								COL5A1	P20908	14		RAD23A	P54725	0.367129
								CTSV	O60911	14		ITGA5	P08648	0.367051
								MESD	Q14696	14		PSAP	P07602	0.367051
								SYMPK	Q92797	14		REEP5	Q00765	0.366972
								LANCL1	O43813	13		SMU1	Q2TAY7	0.366972
								NECTIN2	Q92692	13		OSGEP	Q9NPF4	0.366816
								IARS2	Q9NSE4	13		OSBP	P22059	0.36666
								CDC42EP4	Q9H3Q1	13		MOB4	Q9Y3A3	0.366581
								ETF1	P62495	13		SREK1	Q8WXA9	0.366503
								SKIC3	Q6PGP7	13		CTSH	P09668	0.366503
								KAT7	O95251	13		PYGB	P11216	0.366503
								SLC12A2	P55011	13		GLA	P06280	0.366425
								USP19	O94966	13		NHERF2	Q15599	0.366347
								POR	P16435	13		HTATSF1	O43719	0.366269
								CMBL	Q96DG6	13		HIP1	O00291	0.366191
								ITGA3	P26006	13		MPG	P29372	0.366113
								CPSF3	Q9UKF6	13		THOC2	Q8NI27	0.366113
								AMPD2	Q01433	13		SERPINB5	P36952	0.366113
								CALML5	Q9NZT1	13		PLS3	P13797	0.366035
								KRT13	P13646	13		EPS15L1	Q9UBC2	0.365724
								CC2D1A	Q6P1N0	13		GPI	P06744	0.365724
								NEDD4L	Q96PU5	13		CALCOCO2	Q13137	0.365646
								ZC3H15	Q8WU90	13		PPP5C	P53041	0.365646
								TMED9	Q9BVK6	13		CAST	P20810	0.365569
								PLXNA3	P51805	13		CCDC43	Q96MW1	0.365569
								TXNDC16	Q9P2K2	13		TOLLIP	Q9H0E2	0.365413
								EXOC7	Q9UPT5	13		SEPTIN11	Q9NVA2	0.365258
								SNX5	Q9Y5X3	13		CHMP1A	Q9HD42	0.36518
								ADAM17	P78536	13		OCLN	Q16625	0.36518
								COLEC12	Q5KU26	13		SEPTIN8	Q92599	0.364871
								CWF19L1	Q69YN2	13		PPIB	P23284	0.364793
								BABAM1	Q9NWV8	13		ITGA6	P23229	0.364793
								PLXNB2	O15031	13		WDR48	Q8TAF3	0.364639
								SYT1	P21579	13		BLMH	Q13867	0.364484
								GOLIM4	O00461	13		RAB6A	P20340	0.364484
								LYPD3	O95274	13		HAGH	Q16775	0.364175
								HP	P00738	13		CNPY3	Q9BT09	0.364098
								PLEKHF2	Q9H8W4	13		AP1S1	P61966	0.364098
								FNTA	P49354	13		PTPRE	P23469	0.364098
								GCFC2	P16383	13		LAP3	P28838	0.364098
								MFAP5	Q13361	13		ADSL	P30566	0.363944
								RALB	P11234	13		PVR	P15151	0.363867
								ATP2B1	P20020	12		CWC27	Q6UX04	0.363636
								ETFB	P38117	12		FHL2	Q14192	0.363483
								MAGED2	Q9UNF1	12		BABAM2	Q9NXR7	0.363483
								RAB11FIP1	Q6WKZ4	12		VPS45	Q9NRW7	0.363406
								ADD1	P35611	12		RBBP6	Q7Z6E9	0.363176
								DEK	P35659	12		RAD23B	P54727	0.363099
								NIBAN2	Q96TA1	12		CYCS	P99999	0.362946
								DIP2B	Q9P265	12		TCOF1	Q13428	0.362793
								ARHGAP1	Q07960	12		ICAM1	P05362	0.36264
								BOD1L1	Q8NFC6	12		CAPN1	P07384	0.362487
								FABP5	Q01469	12		GRIPAP1	Q4V328	0.362334
								RRM2	P31350	12		PPP4R3A	Q6IN85	0.362258
								PIP4K2C	Q8TBX8	12		HSPG2	P98160	0.362182
								SNAP23	O00161	12		PLD3	Q8IV08	0.362182
								ANP32E	Q9BTT0	12		EPHB4	P54760	0.362105
								DENR	O43583	12		EIF4E	P06730	0.362029
								PTK7	Q13308	12		TXNDC16	Q9P2K2	0.362029
								CHST12	Q9NRB3	12		B4GALT7	Q9UBV7	0.362029
								MRE11	P49959	12		GCLM	P48507	0.362029
								POLR1G	O15446	12		UBE2O	Q9C0C9	0.361953
								SMU1	Q2TAY7	12		PPP6C	O00743	0.361953
								HTATSF1	O43719	12		ITGB5	P18084	0.361953
								PLS3	P13797	12		SAE1	Q9UBE0	0.361801
								ITGA6	P23229	12		KNOP1	Q1ED39	0.36142
								TCOF1	Q13428	12		EXOC7	Q9UPT5	0.361345
								EPHB4	P54760	12		ARSK	Q6UWY0	0.361345
								ARSK	Q6UWY0	12		S100A11	P31949	0.361269
								COX6B1	P14854	12		GOLGB1	Q14789	0.361193
								CPNE3	O75131	12		EIF2B4	Q9UI10	0.361193
								HOMER1	Q86YM7	12		TPP1	O14773	0.361193
								ITGA2	P17301	12		ADAM15	Q13444	0.361117
								PUS7	Q96PZ0	12		EXOSC2	Q13868	0.36089
								RAB35	Q15286	12		RAB8A	P61006	0.360814
								SEH1L	Q96EE3	12		LAMB1	P07942	0.360663
								JAK1	P23458	12		SNX5	Q9Y5X3	0.360587
								UFM1	P61960	12		APOE	P02649	0.360436
								RHEB	Q15382	12		SUMO2	P61956	0.360436
								PYGL	P06737	12		TSPAN6	O43657	0.36036
								MMP9	P14780	12		LAMP2	P13473	0.36036
								CDH5	P33151	12		PPP4R2	Q9NY27	0.360134
								TMED4	Q7Z7H5	12		DDAH2	O95865	0.360134
								SELENBP1	Q13228	12		PSMB7	Q99436	0.359908
								EFNB2	P52799	12		SAAL1	Q96ER3	0.359908
								TXNDC9	O14530	12		DNAAF10	Q96MX6	0.359457
								PGAM1	P18669	11		ITGB4	P16144	0.359457
								DIAPH1	O60610	11		M6PR	P20645	0.359382
								EHD1	Q9H4M9	11		ADAM17	P78536	0.359306
								COBLL1	Q53SF7	11		LGALS7B	P47929	0.358932
								NMD3	Q96D46	11		ENSA	O43768	0.358932
								PLIN3	O60664	11		FAM3C	Q92520	0.358932
								GART	P22102	11		ATF6	P18850	0.358932
								GNAI3	P08754	11		BCAM	P50895	0.358857
								AGL	P35573	11		UBXN4	Q92575	0.358857
								NAMPT	P43490	11		COX6B1	P14854	0.358632
								KIAA0319L	Q8IZA0	11		CPNE3	O75131	0.358483
								PRMT3	O60678	11		EPS8	Q12929	0.358408
								COLGALT1	Q8NBJ5	11		EXOC1	Q9NV70	0.358259
								FERMT2	Q96AC1	11		PTPRG	P23470	0.358259
								KRT6B	P04259	11		RPP30	P78346	0.35811
								CAST	P20810	11		AGT	P01019	0.35811
								SEPTIN11	Q9NVA2	11		COLEC12	Q5KU26	0.358035
								ICAM1	P05362	11		PPP1R8	Q12972	0.35796
								HSPG2	P98160	11		STAM	Q92783	0.35796
								SAE1	Q9UBE0	11		CHAF1B	Q13112	0.35796
								BCAM	P50895	11		SKIC2	Q15477	0.357812
								STAM	Q92783	11		PSMD10	O75832	0.357588
								SKIC2	Q15477	11		CAPN2	P17655	0.357588
								AP1G2	O75843	11		PSMD5	Q16401	0.357514
								NAGLU	P54802	11		XXYLT1	Q8NBI6	0.357514
								REPS1	Q96D71	11		THOC3	Q96J01	0.357365
								GPC1	P35052	11		TRMT61A	Q96FX7	0.357291
								PARD6B	Q9BYG5	11		FAM91A1	Q658Y4	0.356846
								VAMP8	Q9BV40	11		KLK6	Q92876	0.356772
								EFEMP1	Q12805	11		SHOC2	Q9UQ13	0.356772
								EPHA6	Q9UF33	11		HOMER1	Q86YM7	0.356772
								PHF14	O94880	11		GMNN	O75496	0.356698
								NRP1	O14786	11		FDPS	P14324	0.356477
								MATN3	O15232	11		ASAH1	Q13510	0.356403
								GALNT2	Q10471	11		CWF19L1	Q69YN2	0.356329
								PRMT6	Q96LA8	11		MBTPS1	Q14703	0.356329
								LDLR	P01130	11		ITGA2	P17301	0.356108
								IL27RA	Q6UWB1	11		CD63	P08962	0.356108
								CHMP2A	O43633	11		PFDN5	Q99471	0.355666
								YME1L1	Q96TA2	11		C9orf78	Q9NZ63	0.355666
								B3GAT3	O94766	11		LRRFIP1	Q32MZ4	0.355592
								ADPGK	Q9BRR6	11		CAPNS1	P04632	0.355445
								GINM1	Q9NU53	11		UPF2	Q9HAU5	0.355298
								SUMF1	Q8NBK3	11		STXBP1	P61764	0.355298
								ST3GAL4	Q11206	11		CKS1B	P61024	0.355225
								HEXB	P07686	10		STRN3	Q13033	0.355005
								ABCF1	Q8NE71	10		PUS7	Q96PZ0	0.354932
								CNP	P09543	10		UBA3	Q8TBC4	0.354859
								GRSF1	Q12849	10		FBXL18	Q96ME1	0.354712
								KRT17	Q04695	10		SERPINA1	P01009	0.354639
								NCAPD2	Q15021	10		PXDN	Q92626	0.35442
								PYGB	P11216	10		CARMIL1	Q5VZK9	0.354201
								BLMH	Q13867	10		AP1G2	O75843	0.354055
								HAGH	Q16775	10		NAGLU	P54802	0.354055
								ENSA	O43768	10		TTC1	Q99614	0.354055
								FAM3C	Q92520	10		PFDN2	Q9UHV9	0.353909
								UBXN4	Q92575	10		ADAM9	Q13443	0.353909
								EPS8	Q12929	10		TXNDC5	Q8NBS9	0.353837
								PTPRG	P23470	10		SERPINA3	P01011	0.353764
								TRMT61A	Q96FX7	10		ZG16B	Q96DA0	0.353618
								FAM91A1	Q658Y4	10		RAB35	Q15286	0.353473
								CD63	P08962	10		CHML	P26374	0.353473
								STXBP1	P61764	10		ADSS2	P30520	0.353473
								CKS1B	P61024	10		NSMAF	Q92636	0.353255
								PXDN	Q92626	10		CSTB	P04080	0.353255
								ADAM9	Q13443	10		SEH1L	Q96EE3	0.353183
								ASPSCR1	Q9BZE9	10		REPS1	Q96D71	0.35311
								APLP1	P51693	10		LAMA5	O15230	0.352821
								SEMA3B	Q13214	10		NUDT1	P36639	0.352821
								GBP2	P32456	10		EXT2	Q93063	0.352748
								IDH2	P48735	10		POGLUT3	Q7Z4H8	0.352748
								TMEM132A	Q24JP5	10		ENPP1	P22413	0.352676
								CFL2	Q9Y281	10		UBE4A	Q14139	0.352604
								DDR1	Q08345	10		GNS	P15586	0.352604
								ISG15	P05161	10		BABAM1	Q9NWV8	0.352459
								NUTF2	P61970	10		JAK1	P23458	0.352459
								IFT27	Q9BW83	10		UFM1	P61960	0.352387
								FUT11	Q495W5	10		ARHGAP17	Q68EM7	0.351882
								ZFAND2B	Q8WV99	10		STAG2	Q8N3U4	0.351738
								QDPR	P09417	9		CETN2	P41208	0.351523
								RALA	P11233	9		GPC1	P35052	0.351164
								TBC1D10B	Q4KMP7	9		ARSA	P15289	0.351092
								RNF113A	O15541	9		RHEB	Q15382	0.351092
								WDR44	Q5JSH3	9		GALNS	P34059	0.350949
								FAM83B	Q5T0W9	9		CDCP1	Q9H5V8	0.350949
								CD59	P13987	9		RPS6KB1	P23443	0.350734
								PSAP	P07602	9		TMSB4X	P62328	0.350663
								OSBP	P22059	9		ASPSCR1	Q9BZE9	0.35052
								GLA	P06280	9		ECE1	P42892	0.35052
								SERPINB5	P36952	9		SCYL1	Q96KG9	0.350377
								RAB6A	P20340	9		VASP	P50552	0.350377
								VPS45	Q9NRW7	9		PARD6B	Q9BYG5	0.350163
								B4GALT7	Q9UBV7	9		VAMP8	Q9BV40	0.350092
								ADAM15	Q13444	9		JAG1	P78504	0.350092
								ATF6	P18850	9		TAX1BP3	O14907	0.349949
								GMNN	O75496	9		NUP58	Q9BVL2	0.349878
								LRRFIP1	Q32MZ4	9		EFEMP1	Q12805	0.349878
								CAPNS1	P04632	9		APLP1	P51693	0.349878
								UBA3	Q8TBC4	9		EPHA6	Q9UF33	0.349807
								TTC1	Q99614	9		LSM3	P62310	0.349665
								CHML	P26374	9		SUMF2	Q8NBJ7	0.349665
								UBE4A	Q14139	9		SEPTIN10	Q9P0V9	0.349665
								TMSB4X	P62328	9		CRELD2	Q6UXH1	0.349593
								TAX1BP3	O14907	9		HMGCS1	Q01581	0.349451
								RHOB	P62745	9		RHOB	P62745	0.34938
								B4GALT4	O60513	9		EXOSC7	Q15024	0.34931
								TMEM30A	Q9NV96	9		OSMR	Q99650	0.34931
								PCSK6	P29122	9		NAPG	Q99747	0.349239
								GOLGA4	Q13439	9		SLC5A6	Q9Y289	0.349239
								FURIN	P09958	9		SEMA3B	Q13214	0.348955
								LIMS1	P48059	9		FAM169A	Q9Y6X4	0.348814
								LRP6	O75581	9		PLXNB2	O15031	0.348743
								PALLD	Q8WX93	9		PHF14	O94880	0.348743
								P4HA2	O15460	9		PPP6R3	Q5H9R7	0.348672
								ARIH2	O95376	9		NRP1	O14786	0.348602
								FIS1	Q9Y3D6	9		CDC42BPB	Q9Y5S2	0.348602
								DAAM1	Q9Y4D1	9		EXOC3	O60645	0.348531
								ATP9A	O75110	9		FNTB	P49356	0.34839
								AGRN	O00468	9		GNB4	Q9HAV0	0.348319
								CRELD1	Q96HD1	9		THUMPD1	Q9NXG2	0.348037
								PPME1	Q9Y570	9		CD46	P15529	0.347896
								ELP3	Q9H9T3	9		SYT1	P21579	0.347756
								FGFRL1	Q8N441	9		GOLIM4	O00461	0.347685
								COL12A1	Q99715	9		PYGL	P06737	0.347615
								PDAP1	Q13442	8		MMP9	P14780	0.347545
								DFFA	O00273	8		TSPAN14	Q8NG11	0.347405
								ITCH	Q96J02	8		LLGL2	Q6P1M3	0.347334
								GPC4	O75487	8		MATN3	O15232	0.347334
								HAL	P42357	8		PTGDS	P41222	0.347334
								ALCAM	Q13740	8		TNFSF10	P50591	0.347334
								GAN	Q9H2C0	8		GYS1	P13807	0.347054
								GLB1	P16278	8		GALNT2	Q10471	0.346984
								ROCK2	O75116	8		MINDY3	Q9H8M7	0.346914
								AP1S1	P61966	8		COL5A1	P20908	0.346704
								PTPRE	P23469	8		MTR	Q99707	0.346565
								ADSL	P30566	8		ATN1	P54259	0.346495
								CWC27	Q6UX04	8		SLC29A1	Q99808	0.346425
								BABAM2	Q9NXR7	8		FAM234A	Q9H0X4	0.346216
								RPP30	P78346	8		PPL	O60437	0.346216
								CHAF1B	Q13112	8		CTSV	O60911	0.346146
								XXYLT1	Q8NBI6	8		MESD	Q14696	0.346076
								FDPS	P14324	8		CDH5	P33151	0.346007
								MBTPS1	Q14703	8		FBLN5	Q9UBX5	0.345798
								SERPINA1	P01009	8		LYPD3	O95274	0.34552
								TXNDC5	Q8NBS9	8		HP	P00738	0.345451
								NUDT1	P36639	8		AKR1A1	P14550	0.345312
								EXT2	Q93063	8		PLCB3	Q01970	0.345243
								GNS	P15586	8		B4GALT4	O60513	0.345174
								VASP	P50552	8		COL6A2	P12110	0.345104
								SUMF2	Q8NBJ7	8		SYMPK	Q92797	0.345035
								SEPTIN10	Q9P0V9	8		TMEM30A	Q9NV96	0.345035
								OSMR	Q99650	8		DNASE2	O00115	0.344828
								EXOC3	O60645	8		GABPA	Q06546	0.34462
								GYS1	P13807	8		PRMT6	Q96LA8	0.34462
								PLCB3	Q01970	8		LDLR	P01130	0.344551
								FARP2	O94887	8		TMED4	Q7Z7H5	0.344482
								NHLRC3	Q5JS37	8		FARP2	O94887	0.344482
								GLT8D1	Q68CQ7	8		NHLRC3	Q5JS37	0.344344
								CMAS	Q8NFW8	8		FBN2	P35556	0.344344
								MAP1S	Q66K74	8		COL17A1	Q9UMD9	0.344275
								CGA	P01215	8		CLIC4	Q9Y696	0.344275
								S100A10	P60903	8		GBP2	P32456	0.344138
								LDHAL6B	Q9BYZ2	8		GLT8D1	Q68CQ7	0.344138
								COLEC11	Q9BWP8	8		ADH5	P11766	0.344138
								PTPRU	Q92729	8		PLEKHF2	Q9H8W4	0.344069
								PLXDC2	Q6UX71	8		RUFY1	Q96T51	0.344069
								WDR12	Q9GZL7	8		TMEM59	Q9BXS4	0.344
								PLXNA2	O75051	8		PCSK6	P29122	0.344
								PCSK5	Q92824	8		POLD2	P49005	0.344
								PREPL	Q4J6C6	8		PLTP	P55058	0.344
								HIBADH	P31937	8		MANSC1	Q9H8J5	0.343725
								B4GALT5	O43286	8		JAM3	Q9BX67	0.343588
								IDUA	P35475	8		GOLGA4	Q13439	0.343519
								ACO2	Q99798	7		GGCT	O75223	0.343313
								SMC4	Q9NTJ3	7		CMAS	Q8NFW8	0.343039
								TES	Q9UGI8	7		FNTA	P49354	0.342971
								FUCA2	Q9BTY2	7		SELENBP1	Q13228	0.342971
								MDH1	P40925	7		SCPEP1	Q9HB40	0.342903
								ATRN	O75882	7		IL27RA	Q6UWB1	0.342834
								VAT1	Q99536	7		MUC1	P15941	0.342766
								CCDC43	Q96MW1	7		MAP1S	Q66K74	0.342629
								LAP3	P28838	7		PLAT	P00750	0.342561
								PLD3	Q8IV08	7		SERPING1	P05155	0.342561
								LAMP2	P13473	7		LIPA	P38571	0.342493
								ITGB4	P16144	7		COTL1	Q14019	0.342357
								C9orf78	Q9NZ63	7		CHST14	Q8NCH0	0.34222
								ENPP1	P22413	7		CHMP2A	O43633	0.342152
								JAG1	P78504	7		NUSAP1	Q9BXS6	0.342152
								HMGCS1	Q01581	7		PSMD9	O00233	0.342084
								SLC5A6	Q9Y289	7		FURIN	P09958	0.341948
								PPP6R3	Q5H9R7	7		RXYLT1	Q9Y2B1	0.34188
								CDC42BPB	Q9Y5S2	7		JAG2	Q9Y219	0.341812
								GNB4	Q9HAV0	7		LIMS1	P48059	0.341338
								TSPAN14	Q8NG11	7		CGA	P01215	0.34127
								CHST14	Q8NCH0	7		S100A10	P60903	0.341202
								NUSAP1	Q9BXS6	7		CHMP1B	Q7LBR1	0.340999
								CHMP1B	Q7LBR1	7		UBE2H	P62256	0.340932
								HTRA1	Q92743	7		HTRA1	Q92743	0.340864
								MEGF8	Q7Z7M0	7		CASP7	P55210	0.340864
								BTF3L4	Q96K17	7		LRP6	O75581	0.340797
								SERPINB8	P50452	7		GCFC2	P16383	0.340662
								CAP2	P40123	7		PLSCR1	O15162	0.340527
								NUCB1	Q02818	7		WRAP53	Q9BUR4	0.340459
								ELP2	Q6IA86	7		MEGF8	Q7Z7M0	0.340459
								TXN2	Q99757	7		MFAP5	Q13361	0.340392
								MCTS1	Q9ULC4	7		MFGE8	Q08431	0.340324
								NUCB2	P80303	7		PALLD	Q8WX93	0.340055
								RHOC	P08134	7		ANO6	Q4KMQ2	0.340055
								AGA	P20933	7		SPARC	P09486	0.339988
								THSD4	Q6ZMP0	7		KRT3	P12035	0.339854
								DERA	Q9Y315	7		IDH2	P48735	0.33925
								TDP1	Q9NUW8	7		P4HA2	O15460	0.33925
								MANBA	O00462	7		PLA2G10	O15496	0.339117
								SERPINE1	P05121	7		BTF3L4	Q96K17	0.338983
								IFI30	P13284	7		TMEM132A	Q24JP5	0.338849
								GALNT6	Q8NCL4	7		LDHAL6B	Q9BYZ2	0.338849
								CNPY2	Q9Y2B0	7		SERPINB8	P50452	0.338849
								TAX1BP1	Q86VP1	7		SMAP1	Q8IYB5	0.338849
								FXYD3	Q14802	7		TENM3	Q9P273	0.338716
								QPRT	Q15274	7		ARIH2	O95376	0.338516
								CLSTN3	Q9BQT9	7		CAP2	P40123	0.338449
								EMILIN2	Q9BXX0	7		BPNT1	O95861	0.338383
								FAM20B	O75063	7		CPE	P16870	0.338316
								TACC2	O95359	6		TRHDE	Q9UKU6	0.338117
								LGR4	Q9BXB1	6		ENTPD6	O75354	0.337984
								S100A11	P31949	6		FIS1	Q9Y3D6	0.337917
								M6PR	P20645	6		COLEC11	Q9BWP8	0.337917
								CSTB	P04080	6		LAMA1	P25391	0.337453
								ARHGAP17	Q68EM7	6		NUCB1	Q02818	0.337387
								CDCP1	Q9H5V8	6		RALB	P11234	0.337321
								RPS6KB1	P23443	6		EFNB2	P52799	0.337321
								THUMPD1	Q9NXG2	6		CFL2	Q9Y281	0.337255
								CD46	P15529	6		TACSTD2	P09758	0.337189
								MINDY3	Q9H8M7	6		UROD	P06132	0.337057
								MTR	Q99707	6		CHID1	Q9BWS9	0.336991
								SLC29A1	Q99808	6		COL4A5	P29400	0.336925
								PPL	O60437	6		CHSY1	Q86X52	0.336859
								AKR1A1	P14550	6		KYAT3	Q6YP21	0.336727
								POLD2	P49005	6		TXNDC9	O14530	0.336529
								PLAT	P00750	6		PTPRU	Q92729	0.336529
								JAG2	Q9Y219	6		DDR1	Q08345	0.336463
								KRT3	P12035	6		ISG15	P05161	0.336463
								LAMA1	P25391	6		SLC44A1	Q8WWI5	0.336463
								COL4A5	P29400	6		ELP2	Q6IA86	0.336266
								GATD1	Q8NB37	6		NUTF2	P61970	0.336134
								OGA	O60502	6		TXN2	Q99757	0.336134
								ADAM19	Q9H013	6		STK10	O94804	0.336069
								PCDH1	Q08174	6		PLXDC2	Q6UX71	0.335938
								GNAQ	P50148	6		GNPTG	Q9UJJ9	0.335872
								NPC2	P61916	6		VPS39	Q96JC1	0.335806
								ATP6V1C1	P21283	6		DAAM1	Q9Y4D1	0.335741
								WFDC2	Q14508	6		MCTS1	Q9ULC4	0.335675
								SPINT2	O43291	6		ATP9A	O75110	0.33561
								SCP2	P22307	6		GATD1	Q8NB37	0.33561
								LRP4	O75096	6		WNT11	O96014	0.335544
								DDAH1	O94760	6		NETO2	Q8NC67	0.335544
								NACC1	Q96RE7	6		WDR12	Q9GZL7	0.335479
								ADAMTSL4	Q6UY14	6		OGA	O60502	0.335348
								RP2	O75695	6		KIAA1217	Q5T5P2	0.335348
								LANCL2	Q9NS86	6		S100A16	Q96FQ6	0.335217
								ALDH16A1	Q8IZ83	6		AGRN	O00468	0.335087
								GMPPB	Q9Y5P6	6		YME1L1	Q96TA2	0.335021
								EFNA5	P52803	6		MPZL1	O95297	0.334891
								PCDHGC3	Q9UN70	6		SMPDL3B	Q92485	0.334826
								PCOLCE	Q15113	6		FAH	P16930	0.334695
								CGREF1	Q99674	6		CD320	Q9NPF0	0.3345
								MYOF	Q9NZM1	5		AREG	P15514	0.33437
								DBR1	Q9UK59	5		MAN2A1	Q16706	0.33424
								AGT	P01019	5		NUCB2	P80303	0.33411
								ASAH1	Q13510	5		ADAM19	Q9H013	0.33411
								FBXL18	Q96ME1	5		CRELD1	Q96HD1	0.333592
								CARMIL1	Q5VZK9	5		HAPLN3	Q96S86	0.333269
								ECE1	P42892	5		RHOC	P08134	0.332946
								PTGDS	P41222	5		AGA	P20933	0.332753
								FBN2	P35556	5		IFT27	Q9BW83	0.332689
								COL17A1	Q9UMD9	5		TMED8	Q6PL24	0.332689
								RUFY1	Q96T51	5		FUT11	Q495W5	0.33256
								PLTP	P55058	5		ISOC1	Q96CN7	0.332367
								SCPEP1	Q9HB40	5		PLXNA2	O75051	0.331918
								SERPING1	P05155	5		THSD4	Q6ZMP0	0.331726
								UBE2H	P62256	5		DERA	Q9Y315	0.331662
								CASP7	P55210	5		PCDH1	Q08174	0.331662
								MFGE8	Q08431	5		PLXNB1	O43157	0.331534
								TENM3	Q9P273	5		GNAQ	P50148	0.331279
								BPNT1	O95861	5		PPME1	Q9Y570	0.331088
								CPE	P16870	5		TDP1	Q9NUW8	0.330451
								TRHDE	Q9UKU6	5		PLBD2	Q8NHP8	0.330388
								CHID1	Q9BWS9	5		LOXL1	Q08397	0.330388
								CHSY1	Q86X52	5		NPC2	P61916	0.330325
								GNPTG	Q9UJJ9	5		ATP6V1C1	P21283	0.329691
								VPS39	Q96JC1	5		DNPEP	Q9ULA0	0.329691
								S100A16	Q96FQ6	5		MANBA	O00462	0.329502
								PLXNB1	O43157	5		SERPINE1	P05121	0.329502
								DNPEP	Q9ULA0	5		GCNT1	Q02742	0.329187
								BCAT1	P54687	5		PCSK5	Q92824	0.328558
								FTO	Q9C0B1	5		BCAT1	P54687	0.328495
								XPNPEP1	Q9NQW7	5		ELP3	Q9H9T3	0.328307
								GINS3	Q9BRX5	5		WFDC2	Q14508	0.327744
								LTBR	P36941	5		SPINT2	O43291	0.327619
								SMAP	O00193	5		SCP2	P22307	0.327619
								RTN4R	Q9BZR6	5		FTO	Q9C0B1	0.327619
								GALNT1	Q10472	5		IFI30	P13284	0.326996
								F11R	Q9Y624	5		XPNPEP1	Q9NQW7	0.326934
								NECTIN1	Q15223	5		GINS3	Q9BRX5	0.32681
								ME1	P48163	5		B3GAT3	O94766	0.3265
								GPRC5C	Q9NQ84	5		PREPL	Q4J6C6	0.326438
								RPP40	O75818	5		GALNT6	Q8NCL4	0.326438
								UBE2Q1	Q7Z7E8	5		DSC1	Q08554	0.326376
								MAN2C1	Q9NTJ4	5		CNPY2	Q9Y2B0	0.326314
								MANEAL	Q5VSG8	5		LRP4	O75096	0.326252
								LTBP4	Q8N2S1	5		FGFRL1	Q8N441	0.325573
								GCLM	P48507	4		LTBR	P36941	0.325511
								TPP1	O14773	4		DDAH1	O94760	0.325449
								ADSS2	P30520	4		HIBADH	P31937	0.32508
								POGLUT3	Q7Z4H8	4		SMAP	O00193	0.324896
								FAM169A	Q9Y6X4	4		TAX1BP1	Q86VP1	0.324835
								ADH5	P11766	4		TBC1D23	Q9NUY8	0.324835
								GGCT	O75223	4		SH3PXD2B	A1X283	0.324467
								LIPA	P38571	4		MTAP	Q13126	0.3241
								RXYLT1	Q9Y2B1	4		ZFAND2B	Q8WV99	0.324039
								SPARC	P09486	4		ADI1	Q9BV57	0.323856
								SLC44A1	Q8WWI5	4		ADPGK	Q9BRR6	0.323734
								WNT11	O96014	4		RTN4R	Q9BZR6	0.323491
								KIAA1217	Q5T5P2	4		FXYD3	Q14802	0.323005
								CD320	Q9NPF0	4		TCEAL4	Q96EI5	0.322944
								ISOC1	Q96CN7	4		GALNT1	Q10472	0.322339
								PLBD2	Q8NHP8	4		NDRG2	Q9UN36	0.322278
								LOXL1	Q08397	4		F11R	Q9Y624	0.321856
								ADI1	Q9BV57	4		QPRT	Q15274	0.321676
								TCEAL4	Q96EI5	4		NECTIN1	Q15223	0.321495
								NDUFA8	P51970	4		PEPD	P12955	0.321495
								SEZ6L2	Q6UXD5	4		PPIL3	Q9H2H8	0.321375
								HID1	Q8IV36	4		CLIC3	O95833	0.321255
								GAS6	Q14393	4		NACC1	Q96RE7	0.320955
								SDR9C7	Q8NEX9	4		GINM1	Q9NU53	0.320656
								TM9SF2	Q99805	4		B4GALT5	O43286	0.320596
								CD47	Q08722	4		NDUFA8	P51970	0.320119
								FKBP2	P26885	4		SUMF1	Q8NBK3	0.319643
								PREP	P48147	4		SPPL2A	Q8TCT8	0.319169
								CELSR1	Q9NYQ6	4		ADAMTSL4	Q6UY14	0.318519
								ALDOB	P05062	4		SDK1	Q7Z5N4	0.31846
								S100A13	Q99584	4		GTF2E1	P29083	0.318283
								COL16A1	Q07092	4		WASHC4	Q2M389	0.318224
								LRP5	O75197	4		BAX	Q07812	0.318106
								TGFBR3	Q03167	4		RP2	O75695	0.317871
								CHST10	O43529	4		ME1	P48163	0.317812
								UFC1	Q9Y3C8	4		RAB22A	Q9UL26	0.31746
								PUDP	Q08623	4		LANCL2	Q9NS86	0.317402
								WDR45B	Q5MNZ6	4		ALDH16A1	Q8IZ83	0.317402
								GDE1	Q9NZC3	4		GPRC5C	Q9NQ84	0.317343
								MPI	P34949	4		CLSTN3	Q9BQT9	0.317109
								XYLT2	Q9H1B5	4		ERAP1	Q9NZ08	0.316176
								HS6ST1	O60243	4		SEZ6L2	Q6UXD5	0.316118
								FAHD1	Q6P587	4		CZIB	Q9NWV4	0.315886
								TNFSF10	P50591	3		RPP40	O75818	0.315654
								CLIC4	Q9Y696	3		HID1	Q8IV36	0.315596
								JAM3	Q9BX67	3		GMPPB	Q9Y5P6	0.315307
								MUC1	P15941	3		GAS6	Q14393	0.315134
								COTL1	Q14019	3		AMIGO2	Q86SJ2	0.314788
								ANO6	Q4KMQ2	3		EMILIN2	Q9BXX0	0.31473
								ENTPD6	O75354	3		EFNA5	P52803	0.31473
								KYAT3	Q6YP21	3		SDR9C7	Q8NEX9	0.314385
								MPZL1	O95297	3		RNASET2	O00584	0.314385
								SMPDL3B	Q92485	3		PCDHGC3	Q9UN70	0.313983
								DSC1	Q08554	3		COL12A1	Q99715	0.313811
								TBC1D23	Q9NUY8	3		PTMS	P20962	0.31364
								SH3PXD2B	A1X283	3		NAA25	Q14CX7	0.313297
								MTAP	Q13126	3		IDUA	P35475	0.31324
								NDRG2	Q9UN36	3		UBE2Q1	Q7Z7E8	0.312727
								PPIL3	Q9H2H8	3		TM9SF2	Q99805	0.312727
								CLIC3	O95833	3		MAN2C1	Q9NTJ4	0.312216
								SPPL2A	Q8TCT8	3		CD47	Q08722	0.312046
								SDK1	Q7Z5N4	3		L1CAM	P32004	0.311594
								GTF2E1	P29083	3		FKBP2	P26885	0.311031
								WASHC4	Q2M389	3		PREP	P48147	0.310245
								BAX	Q07812	3		CELSR1	Q9NYQ6	0.310078
								RAB22A	Q9UL26	3		ALDOB	P05062	0.309687
								NAA25	Q14CX7	3		CD58	P19256	0.309186
								COL6A3	P12111	3		S100A13	Q99584	0.307747
								RBKS	Q9H477	3		FAM20B	O75063	0.307582
								FST	P19883	3		MANEAL	Q5VSG8	0.307472
								RIDA	P52758	3		COL16A1	Q07092	0.307307
								BTD	P43251	3		COL6A3	P12111	0.307253
								SPRYD4	Q8WW59	3		PCOLCE	Q15113	0.306431
								KRT23	Q9C075	3		RBKS	Q9H477	0.306431
								MMP15	P51511	3		CGREF1	Q99674	0.305778
								CD276	Q5ZPR3	3		LRP5	O75197	0.305073
								SPINT1	O43278	3		ST3GAL4	Q11206	0.304965
								PPT2	Q9UMR5	3		TGFBR3	Q03167	0.304802
								ATOX1	O00244	3		FST	P19883	0.304694
								HEXA	P06865	3		CHST10	O43529	0.304102
								MGAT2	Q10469	3		ADK	P55263	0.304102
								BCAT2	O15382	3		RIDA	P52758	0.303833
								PPCS	Q9HAB8	3		BTD	P43251	0.303297
								GBP1	P32455	3		LTBP4	Q8N2S1	0.302924
								DNASE2	O00115	2		SPRYD4	Q8WW59	0.302604
								SMAP1	Q8IYB5	2		SEMA4D	Q92854	0.302232
								UROD	P06132	2		KRT23	Q9C075	0.302072
								STK10	O94804	2		MMP15	P51511	0.301754
								NETO2	Q8NC67	2		UFC1	Q9Y3C8	0.301596
								FAH	P16930	2		CD276	Q5ZPR3	0.301226
								AREG	P15514	2		SPINT1	O43278	0.300857
								MAN2A1	Q16706	2		CD55	P08174	0.299704
								HAPLN3	Q96S86	2		PPT2	Q9UMR5	0.299652
								TMED8	Q6PL24	2		ENPP5	Q9UJA9	0.298922
								GCNT1	Q02742	2		ATOX1	O00244	0.298507
								PEPD	P12955	2		PUDP	Q08623	0.298197
								ERAP1	Q9NZ08	2		CTBS	Q01459	0.297939
								CZIB	Q9NWV4	2		WDR45B	Q5MNZ6	0.297475
								AMIGO2	Q86SJ2	2		SEMA4B	Q9NPR2	0.297372
								RNASET2	O00584	2		HEXA	P06865	0.296501
								PTMS	P20962	2		GDE1	Q9NZC3	0.294571
								L1CAM	P32004	2		SMPDL3A	Q92484	0.293465
								CD58	P19256	2		KYAT1	Q16773	0.293415
								ADK	P55263	2		C11orf54	Q9H0W9	0.293415
								SEMA4D	Q92854	2		SLC2A3	P11169	0.293365
								CD55	P08174	2		MPI	P34949	0.29207
								CTBS	Q01459	2		LDLRAD3	Q86YD5	0.291377
								SEMA4B	Q9NPR2	2		XYLT2	Q9H1B5	0.289855
								SMPDL3A	Q92484	2		PHYKPL	Q8IUZ5	0.289611
								KYAT1	Q16773	2		MGAT2	Q10469	0.288833
								C11orf54	Q9H0W9	2		RGMA	Q96B86	0.288252
								SLC2A3	P11169	2		ADGRA3	Q8IWK6	0.288155
								PHYKPL	Q8IUZ5	2		BCAT2	O15382	0.285051
								RGMA	Q96B86	2		NPPB	P16860	0.283688
								ADGRA3	Q8IWK6	2		HS6ST1	O60243	0.281598
								NPPB	P16860	2		PGK2	P07205	0.274936
								PGK2	P07205	2		MMP19	Q99542	0.273885
								TWSG1	Q9GZX9	2		TWSG1	Q9GZX9	0.272324
								DCK	P27707	2		DCK	P27707	0.272238
								NEO1	Q92859	2		PPCS	Q9HAB8	0.271937
								C5orf22	Q49AR2	2		NEO1	Q92859	0.270483
								ADGRL1	O94910	2		C5orf22	Q49AR2	0.27044
								MMUT	P22033	2		ADGRL1	O94910	0.269635
								ENPP5	Q9UJA9	1		GBP1	P32455	0.269128
								LDLRAD3	Q86YD5	1		TNFRSF11B	O00300	0.267913
								MMP19	Q99542	1		COL26A1	Q96A83	0.266749
								TNFRSF11B	O00300	1		MVB12B	Q9H7P6	0.266336
								COL26A1	Q96A83	1		FAHD1	Q6P587	0.265966
								MVB12B	Q9H7P6	1		INPP4B	O15327	0.258919
								INPP4B	O15327	1		MMUT	P22033	0.256563
								IMPA1	P29218	1		IMPA1	P29218	0.247803

## Sheet: Supplementary Table2 MCF7_Down
From dynamic PABC media vs. Static MCF7 conditioned culture Network made from DOWNREGULATED DEPs and nonDEPs								From the dynamic PABC media vs. Static MCF7 conditioned culture Netwok made from DOWNREGULATED DEP and nonDEPs
DEPs ranked by Degree (Top )				DEPs ranked by Closeness Centrality				nonDEPs ranked by Degree (Top )				nonDEPs ranked by Closeness Centrality				Network Visualization									Network Quick Facts
Uniprot ID	Name	Degree		Uniprot ID	Name	Closeness Centrality		Uniprot ID	Name	Degree		Uniprot ID	Name	Closeness Centrality		NOTE: A Degree-sorted circle layout has been applied to the 20 highest Degree DEPs									2550	The total number of nodes (DEPs and nonDEPs) in the main connected component
P26196	DDX6	634		P26196	DDX6	0.539357		P61981	YWHAG	597		P61981	YWHAG	0.539585		All other proteins and the edges between them have been set to a low opacity									46759	The total number of edges in the main connected component
P47756	CAPZB	455		P47756	CAPZB	0.513497		Q13618	CUL3	551		Q13618	CUL3	0.53082		NOTE: the colouring of the nodes is based on Degree.									38.95	The average Degree of DEPs in the main connected component
Q9Y3A5	SBDS	431		Q9Y3A5	SBDS	0.507062		Q9NR30	DDX21	437		Q9NR30	DDX21	0.506156		Higher Degree nodes are darker blue, and lower Degree nodes are lighter blue									35.49	The average Degree of nonDEPs in the main connected component
Q13573	SNW1	397		Q13573	SNW1	0.503655		O75152	ZC3H11A	392		P63104	YWHAZ	0.502761
P06748	NPM1	384		P62993	GRB2	0.501377		Q6ZN17	LIN28B	375		O75152	ZC3H11A	0.496784
Q99459	CDC5L	358		P07910	HNRNPC	0.495625		O75940	SMNDC1	362		Q92905	COPS5	0.49524											DEPs not in the main connected component include:
P07910	HNRNPC	350		Q99459	CDC5L	0.495529		Q92905	COPS5	355		P02751	FN1	0.493801											(COX16, NAPRT, A4GALT, GFRA1, STC1, MXRA8, RTN4RL1, PRSS27, FABP6, ADAMTS19, CFD, IGSF9, TIMP4, SDSL, SPOCK1, ST3GAL6, MFAP2)
P60520	GABARAPL2	339		P06748	NPM1	0.493323		Q12906	ILF3	338		O75940	SMNDC1	0.490759
Q8WUA2	PPIL4	328		P60520	GABARAPL2	0.493228		Q86VP6	CAND1	337		Q86VP6	CAND1	0.490287
P62993	GRB2	319		Q8WUA2	PPIL4	0.490475		Q9C0B5	ZDHHC5	333		Q6ZN17	LIN28B	0.490192
Q9H9Z2	LIN28A	305		P09651	HNRNPA1	0.480943		Q16629	SRSF7	333		Q9C0B5	ZDHHC5	0.489721											Results
O95218	ZRANB2	266		P11142	HSPA8	0.474851		P63104	YWHAZ	327		Q12906	ILF3	0.488314											These DEPs are both in the list of the top 20 highest Degree and top 20 highest closeness centrality lists:
P09651	HNRNPA1	252		P04792	HSPB1	0.471339		Q15427	SF3B4	321		Q13363	CTBP1	0.486543											(DDX6, CAPZB, SBDS, SNW1, NPM1, CDC5L, HNRNPC, GABARAPL2, PPIL4, GRB2, LIN28A, ZRANB2, HNRNPA1, SRSF1, NCBP1 )
Q07955	SRSF1	233		O95218	ZRANB2	0.470208		Q4G0J3	LARP7	317		P23396	RPS3	0.486172
Q16630	CPSF6	216		Q9H9Z2	LIN28A	0.469775		P02751	FN1	316		Q15427	SF3B4	0.485154											These nonDEPs are both in the list of the top 20 highest Degree and top 20 highest closeness centrality lists:
P11387	TOP1	213		P05067	APP	0.469256		Q13616	CUL1	302		Q4G0J3	LARP7	0.485154											(CAND1, COPS5, CTBP1, CUL1, CUL3, DDX21, FN1, ILF3, LARP7, LIN28B, RBM15, RPS3, SF3B4, SMNDC1, SRSF7, YWHAG, YWHAZ, ZC3H11A, ZDHHC5)
Q09161	NCBP1	206		Q09161	NCBP1	0.46805		P23396	RPS3	298		Q16629	SRSF7	0.48497
P35637	FUS	204		P08238	HSP90AB1	0.466593		P62280	RPS11	275		P11021	HSPA5	0.483865
Q8WXF1	PSPC1	202		P12956	XRCC6	0.466508		Q96T37	RBM15	274		Q13616	CUL1	0.480581
Q14498	RBM39	192		Q07955	SRSF1	0.465316		Q13363	CTBP1	251		Q96T37	RBM15	0.478955
Q9Y5S9	RBM8A	192		P27348	YWHAQ	0.463707		P09622	DLD	241		Q96FW1	OTUB1	0.476538
Q13283	G3BP1	187		Q13283	G3BP1	0.46295		Q96FW1	OTUB1	234		P62280	RPS11	0.476182
P26368	U2AF2	186		P35637	FUS	0.461859		Q08945	SSRP1	232		P09622	DLD	0.473704
P11142	HSPA8	183		P01116	KRAS	0.461775		P04156	PRNP	225		Q04917	YWHAH	0.473528
P11362	FGFR1	181		Q16543	CDC37	0.460524		Q92804	TAF15	216		P31946	YWHAB	0.469084
P46013	MKI67	180		P67809	YBX1	0.460191		Q04917	YWHAH	204		Q08945	SSRP1	0.467878
P09234	SNRPC	179		P11387	TOP1	0.459611		Q53F19	NCBP3	202		P19784	CSNK2A2	0.467621
P01116	KRAS	179		P62136	PPP1CA	0.458701		O96013	PAK4	201		Q15233	NONO	0.465316
P01111	NRAS	177		P22626	HNRNPA2B1	0.458041		Q93034	CUL5	198		O96013	PAK4	0.465061
P63244	RACK1	176		P46013	MKI67	0.457959		P09012	SNRPA	198		P62258	YWHAE	0.464807
P04792	HSPB1	171		Q08J23	NSUN2	0.457795		O75821	EIF3G	195		P04156	PRNP	0.462613
P67809	YBX1	171		Q16630	CPSF6	0.457302		P19784	CSNK2A2	195		Q92804	TAF15	0.462194
Q13620	CUL4B	164		P10809	HSPD1	0.456483		P46777	RPL5	192		Q99714	HSD17B10	0.462194
P09429	HMGB1	152		Q8NC51	SERBP1	0.454854		Q15233	NONO	184		O75821	EIF3G	0.46211
P08238	HSP90AB1	146		P26368	U2AF2	0.454691		Q06787	FMR1	184		P46777	RPL5	0.460857
Q15459	SF3A1	146		P19338	NCL	0.454286		P00441	SOD1	183		Q06787	FMR1	0.460358
P84098	RPL19	146		Q08211	DHX9	0.454043		Q9UN86	G3BP2	180		Q93034	CUL5	0.460191
O75533	SF3B1	144		P36507	MAP2K2	0.453801		Q00839	HNRNPU	176		Q00839	HNRNPU	0.459528
P27348	YWHAQ	141		P63244	RACK1	0.453559		P49458	SRP9	176		P04626	ERBB2	0.459362
P12956	XRCC6	140		Q00610	CLTC	0.453478		P36578	RPL4	175		P07900	HSP90AA1	0.459197
Q15287	RNPS1	135		Q8WXF1	PSPC1	0.452673		P31946	YWHAB	174		Q13619	CUL4A	0.458124
P22455	FGFR4	132		P09429	HMGB1	0.452673		O43493	TGOLN2	172		Q15691	MAPRE1	0.457959
Q08J23	NSUN2	131		P07437	TUBB	0.452512		Q86VM9	ZC3H18	170		Q53F19	NCBP3	0.457384
P62136	PPP1CA	130		P21333	FLNA	0.450911		P04626	ERBB2	167		P12004	PCNA	0.456646
P05067	APP	129		Q13620	CUL4B	0.450592		P62753	RPS6	166		O00429	DNM1L	0.456156
P05455	SSB	128		Q14498	RBM39	0.450513		P62258	YWHAE	164		P35579	MYH9	0.455748
Q08211	DHX9	128		Q13813	SPTAN1	0.449797		P11021	HSPA5	164		P00441	SOD1	0.454367
Q8NC51	SERBP1	121		O75533	SF3B1	0.449638		Q13595	TRA2A	164		P21796	VDAC1	0.454205
Q9UL18	AGO1	120		Q96PK6	RBM14	0.449005		P27635	RPL10	155		Q14974	KPNB1	0.453317
Q13547	HDAC1	115		P46940	IQGAP1	0.448768		P62306	SNRPF	152		P02545	LMNA	0.452432
O95793	STAU1	114		O60506	SYNCRIP	0.4479		P62913	RPL11	151		Q96SB4	SRPK1	0.452191
P22626	HNRNPA2B1	114		P01111	NRAS	0.447664		Q96SB4	SRPK1	150		P36578	RPL4	0.452031
Q96PK6	RBM14	113		P30153	PPP2R1A	0.44735		O00429	DNM1L	150		Q9Y230	RUVBL2	0.45195
Q13509	TUBB3	110		P11362	FGFR1	0.447271		Q15691	MAPRE1	148		P38919	EIF4A3	0.45139
P47755	CAPZA2	105		P09234	SNRPC	0.446723		Q9UHB9	SRP68	146		P09012	SNRPA	0.450513
O60506	SYNCRIP	105		P11940	PABPC1	0.446723		P38919	EIF4A3	144		P67870	CSNK2B	0.450353
Q16543	CDC37	105		Q15287	RNPS1	0.446644		Q99714	HSD17B10	143		Q13595	TRA2A	0.450194
P36507	MAP2K2	104		Q14247	CTTN	0.44641		Q13619	CUL4A	142		Q9P0L0	VAPA	0.450035
Q13243	SRSF5	104		Q13547	HDAC1	0.446332		Q15003	NCAPH	139		Q9UN86	G3BP2	0.449718
P10809	HSPD1	102		P05455	SSB	0.446254		P12004	PCNA	139		P51114	FXR1	0.449401
P19338	NCL	101		P43243	MATR3	0.446254		Q13247	SRSF6	137		Q16643	DBN1	0.449163
P50914	RPL14	100		P61978	HNRNPK	0.446254		O76094	SRP72	136		P49458	SRP9	0.448768
P43243	MATR3	99		Q9UL18	AGO1	0.445785		P02545	LMNA	136		P62753	RPS6	0.448689
P08579	SNRPB2	97		P51991	HNRNPA3	0.445318		P67870	CSNK2B	135		P22607	FGFR3	0.448531
Q92900	UPF1	96		P84098	RPL19	0.444464		Q9Y295	DRG1	134		P62913	RPL11	0.448452
P14866	HNRNPL	95		Q9Y5S9	RBM8A	0.444386		P22607	FGFR3	134		P14625	HSP90B1	0.447664
Q9UQ80	PA2G4	95		Q02750	MAP2K1	0.444231		P21796	VDAC1	134		Q86VM9	ZC3H18	0.447507
Q14103	HNRNPD	95		Q13509	TUBB3	0.444154		P05388	RPLP0	133		P78527	PRKDC	0.447428
Q15637	SF1	94		Q15459	SF3A1	0.443922		Q14444	CAPRIN1	130		P05388	RPLP0	0.446801
P11940	PABPC1	92		Q13263	TRIM28	0.44369		Q15054	POLD3	126		P04406	GAPDH	0.446488
P62316	SNRPD2	92		Q9Y265	RUVBL1	0.443227		P39019	RPS19	123		Q9UKV8	AGO2	0.446332
P21333	FLNA	92		O95793	STAU1	0.442304		Q13418	ILK	123		Q12905	ILF2	0.445629
P84103	SRSF3	91		P10636	MAPT	0.441538		P42766	RPL35	123		Q99832	CCT7	0.445629
P09382	LGALS1	90		Q92945	KHSRP	0.441385		P62241	RPS8	123		P62899	RPL31	0.445396
P61978	HNRNPK	90		P62316	SNRPD2	0.441309		Q9UKV8	AGO2	122		P62241	RPS8	0.444852
P28799	GRN	90		P62263	RPS14	0.440927		P08069	IGF1R	122		Q07021	C1QBP	0.444852
Q8IY81	FTSJ3	89		Q14103	HNRNPD	0.440698		P20339	RAB5A	121		P62306	SNRPF	0.444696
Q14247	CTTN	88		P60953	CDC42	0.440622		P50579	METAP2	121		P27635	RPL10	0.444309
Q9BXP5	SRRT	87		P61586	RHOA	0.440242		P62424	RPL7A	120		P09874	PARP1	0.444309
P33993	MCM7	87		P25685	DNAJB1	0.440242		Q15428	SF3A2	120		P18077	RPL35A	0.444231
Q9Y5Y6	ST14	87		P52597	HNRNPF	0.440014		P26373	RPL13	118		P78371	CCT2	0.444077
P03950	ANG	86		Q7KZF4	SND1	0.439559		P51114	FXR1	118		P62750	RPL23A	0.443922
O15042	U2SURP	86		P26641	EEF1G	0.439483		Q12888	TP53BP1	116		P62906	RPL10A	0.443922
P16401	H1-5	85		Q92900	UPF1	0.439407		P15880	RPS2	114		Q9Y2W1	THRAP3	0.443922
P46940	IQGAP1	84		Q9BXP5	SRRT	0.439256		P15170	GSPT1	113		Q15393	SF3B3	0.44369
Q9NQW6	ANLN	84		P46108	CRK	0.439256		Q7L5N1	COPS6	112		P06493	CDK1	0.443613
P62330	ARF6	83		P63010	AP2B1	0.43918		Q96GG9	DCUN1D1	112		Q09028	RBBP4	0.443536
P10321	HLA-C	83		P52907	CAPZA1	0.439029		P62750	RPL23A	112		P28482	MAPK1	0.443459
P62263	RPS14	82		P31948	STIP1	0.439029		P09874	PARP1	112		Q15149	PLEC	0.443304
P61586	RHOA	81		P84103	SRSF3	0.438802		Q9Y3U8	RPL36	111		P39019	RPS19	0.442996
P26583	HMGB2	81		P35268	RPL22	0.438726		Q12905	ILF2	109		P05387	RPLP2	0.442996
P08865	RPSA	79		P63000	RAC1	0.438575		P49407	ARRB1	107		Q14008	CKAP5	0.442996
P07437	TUBB	79		P41240	CSK	0.4385		P35916	FLT4	107		O75643	SNRNP200	0.442765
P08621	SNRNP70	79		P62805	H4C9	0.438123		P40429	RPL13A	107		Q9BQE3	TUBA1C	0.442765
P30153	PPP2R1A	79		Q01844	EWSR1	0.438123		P41091	EIF2S3	107		Q13418	ILK	0.442535
P62910	RPL32	78		P62937	PPIA	0.437822		P35579	MYH9	105		Q9NYF8	BCLAF1	0.442535
Q9HCM4	EPB41L5	78		P10644	PRKAR1A	0.437597		P18077	RPL35A	105		Q04837	SSBP1	0.442535
P07949	RET	77		Q9Y383	LUC7L2	0.437521		P62899	RPL31	105		Q13435	SF3B2	0.442458
P62805	H4C9	76		P33993	MCM7	0.437446		P07900	HSP90AA1	105		P17844	DDX5	0.442228
P51858	HDGF	76		P13010	XRCC5	0.437371		Q14974	KPNB1	103		P61160	ACTR2	0.442228
P62304	SNRPE	76		Q14151	SAFB2	0.437296		Q13435	SF3B2	103		P60866	RPS20	0.442151
P62633	CNBP	74		Q04637	EIF4G1	0.437221		P12931	SRC	102		P39023	RPL3	0.442074
Q9NYB0	TERF2IP	74		Q09666	AHNAK	0.436847		P55884	EIF3B	102		Q15054	POLD3	0.441998
P55010	EIF5	74		O14980	XPO1	0.436622		P62140	PPP1CB	102		Q01081	U2AF1	0.441844
P26641	EEF1G	74		P16401	H1-5	0.436547		Q01081	U2AF1	102		P35606	COPB2	0.441844
P63000	RAC1	74		Q8IY81	FTSJ3	0.436398		P18621	RPL17	102		P49407	ARRB1	0.441538
Q02750	MAP2K1	74		O14979	HNRNPDL	0.436398		P62917	RPL8	101		P15880	RPS2	0.441385
O95400	CD2BP2	73		Q9UMS4	PRPF19	0.436398		P31947	SFN	101		Q13200	PSMD2	0.441385
P10636	MAPT	73		P13639	EEF2	0.436398		P78371	CCT2	98		Q13247	SRSF6	0.441232
P35268	RPL22	72		Q99873	PRMT1	0.436323		P13693	TPT1	98		P35222	CTNNB1	0.441232
Q15185	PTGES3	72		Q14254	FLOT2	0.436323		P61247	RPS3A	98		P26373	RPL13	0.441003
P60953	CDC42	72		O00410	IPO5	0.436249		Q6PKG0	LARP1	98		Q14204	DYNC1H1	0.441003
Q00610	CLTC	72		Q15046	KARS1	0.436249		P83105	HTRA4	98		P52292	KPNA2	0.440927
O14979	HNRNPDL	71		P22455	FGFR4	0.435652		Q07020	RPL18	97		P15311	EZR	0.440394
P51991	HNRNPA3	71		P50914	RPL14	0.435578		P15311	EZR	96		P07237	P4HB	0.440394
Q01844	EWSR1	71		P46109	CRKL	0.435578		P62906	RPL10A	96		P08069	IGF1R	0.440318
O00422	SAP18	70		P49792	RANBP2	0.435206		O76021	RSL1D1	96		P20339	RAB5A	0.440318
Q13813	SPTAN1	70		P25205	MCM3	0.435206		Q15375	EPHA7	96		Q9Y5B9	SUPT16H	0.44009
O75607	NPM3	70		P14866	HNRNPL	0.435057		Q9BQG0	MYBBP1A	95		P62140	PPP1CB	0.440014
Q9Y265	RUVBL1	70		P62318	SNRPD3	0.434686		Q14980	NUMA1	95		Q9Y3U8	RPL36	0.439862
P10644	PRKAR1A	69		P49327	FASN	0.434538		Q13523	PRP4K	94		Q14980	NUMA1	0.439786
Q13838	DDX39B	68		P27816	MAP4	0.434242		Q7Z2W4	ZC3HAV1	94		Q7L5N1	COPS6	0.43971
P62826	RAN	68		Q13151	HNRNPA0	0.434168		P60033	CD81	92		P42766	RPL35	0.439634
P62318	SNRPD3	68		P55795	HNRNPH2	0.434168		Q16643	DBN1	91		P31947	SFN	0.439483
Q04637	EIF4G1	68		O15042	U2SURP	0.434094		P62888	RPL30	91		Q9Y490	TLN1	0.439483
P83916	CBX1	67		Q9Y3I0	RTCB	0.43402		P36873	PPP1CC	91		P48634	PRRC2A	0.439407
Q14966	ZNF638	67		Q96QK1	VPS35	0.433872		P11171	EPB41	91		Q9UHB9	SRP68	0.439331
P38159	RBMX	67		P23528	CFL1	0.433872		Q9Y230	RUVBL2	91		Q12888	TP53BP1	0.439331
P49792	RANBP2	67		Q92598	HSPH1	0.433799		Q15393	SF3B3	91		P11171	EPB41	0.439331
Q9UKM9	RALY	66		P38646	HSPA9	0.433651		Q99832	CCT7	91		O75400	PRPF40A	0.439331
Q9UMS4	PRPF19	66		Q13838	DDX39B	0.433577		P61313	RPL15	90		P62917	RPL8	0.43918
P07947	YES1	65		Q15717	ELAVL1	0.433577		Q9UHB6	LIMA1	90		Q6PKG0	LARP1	0.439104
O95292	VAPB	64		P07947	YES1	0.432988		Q9Y2W1	THRAP3	90		P50454	SERPINH1	0.439029
Q92769	HDAC2	64		Q06830	PRDX1	0.432988		P35222	CTNNB1	89		P31689	DNAJA1	0.438877
O00571	DDX3X	64		P04075	ALDOA	0.432107		Q13200	PSMD2	89		P40429	RPL13A	0.438802
Q92614	MYO18A	63		Q14160	SCRIB	0.432034		P61513	RPL37A	88		O60716	CTNND1	0.438651
Q15717	ELAVL1	63		P31942	HNRNPH3	0.431814		Q9HCN8	SDF2L1	88		P18085	ARF4	0.438651
Q13263	TRIM28	63		P14618	PKM	0.431814		P21709	EPHA1	88		P50990	CCT8	0.438575
P23246	SFPQ	62		Q14966	ZNF638	0.431449		Q13451	FKBP5	87		P48643	CCT5	0.438424
P62879	GNB2	62		O95292	VAPB	0.431376		P31943	HNRNPH1	87		P62244	RPS15A	0.438424
Q13151	HNRNPA0	62		Q8N163	CCAR2	0.431303		Q9P0L0	VAPA	87		P30050	RPL12	0.438198
Q14151	SAFB2	62		Q13243	SRSF5	0.431084		P46779	RPL28	86		P36873	PPP1CC	0.438123
P46108	CRK	62		P33991	MCM4	0.43072		Q86UE4	MTDH	86		O43390	HNRNPR	0.438123
Q6PJT7	ZC3H14	61		P47755	CAPZA2	0.430502		O60832	DKC1	86		P55072	VCP	0.438123
O15355	PPM1G	61		P48729	CSNK1A1	0.430502		O00567	NOP56	85		P17987	TCP1	0.438048
Q9NWB6	ARGLU1	61		Q15758	SLC1A5	0.430284		Q07021	C1QBP	85		P61353	RPL27	0.437897
O14980	XPO1	60		Q99729	HNRNPAB	0.429921		P05387	RPLP2	85		P40227	CCT6A	0.437822
Q6NUS6	TCTN3	60		P61081	UBE2M	0.429921		P17844	DDX5	85		P02786	TFRC	0.437747
P48729	CSNK1A1	60		P22314	UBA1	0.429921		O75643	SNRNP200	84		P61289	PSME3	0.437672
Q96DI7	SNRNP40	59		P28799	GRN	0.429703		P17813	ENG	83		Q92734	TFG	0.437672
P46379	BAG6	59		Q13310	PABPC4	0.429414		Q9H307	PNN	83		Q9BQG0	MYBBP1A	0.437296
P52907	CAPZA1	59		Q9UKM9	RALY	0.429341		O95831	AIFM1	82		P34932	HSPA4	0.437221
P84090	ERH	58		P08621	SNRNP70	0.429197		P54652	HSPA2	82		Q7Z2W4	ZC3HAV1	0.437071
P60842	EIF4A1	58		O95400	CD2BP2	0.429052		P62701	RPS4X	82		P46782	RPS5	0.437071
P82970	HMGN5	58		O15355	PPM1G	0.429052		Q9BQE3	TUBA1C	81		P12931	SRC	0.436996
Q7KZF4	SND1	58		Q92499	DDX1	0.428836		Q9NZI8	IGF2BP1	81		Q15003	NCAPH	0.436921
Q13310	PABPC4	58		Q5VYK3	ECPAS	0.428619		Q9NYF8	BCLAF1	81		P62979	RPS27A	0.436921
P63279	UBE2I	58		P62910	RPL32	0.428547		P61160	ACTR2	81		P62424	RPL7A	0.436697
Q9Y3I0	RTCB	57		Q9Y266	NUDC	0.428475		P46781	RPS9	81		P10599	TXN	0.436473
Q5BKZ1	ZNF326	57		Q8N1F7	NUP93	0.428259		P35606	COPB2	81		Q14444	CAPRIN1	0.436398
Q9UQ35	SRRM2	57		Q9Y3F4	STRAP	0.428259		Q14978	NOLC1	81		Q00341	HDLBP	0.436099
O95858	TSPAN15	57		Q9UQ80	PA2G4	0.428187		P25786	PSMA1	80		Q14978	NOLC1	0.436025
Q9BYE2	TMPRSS13	56		O00571	DDX3X	0.427828		P17174	GOT1	79		Q96GG9	DCUN1D1	0.43595
P27361	MAPK3	56		P60842	EIF4A1	0.427685		P62979	RPS27A	79		P55884	EIF3B	0.43595
O14964	HGS	56		P55209	NAP1L1	0.427541		P49368	CCT3	79		O75955	FLOT1	0.43595
P63010	AP2B1	56		P23246	SFPQ	0.427469		P09496	CLTA	79		Q99497	PARK7	0.435876
Q14160	SCRIB	56		O43175	PHGDH	0.427469		Q8IWX8	CHERP	78		P61964	WDR5	0.435876
O94906	PRPF6	56		Q96DI7	SNRNP40	0.427254		P52292	KPNA2	78		P31943	HNRNPH1	0.435801
P52597	HNRNPF	56		P38159	RBMX	0.427183		P20700	LMNB1	78		Q9UHB6	LIMA1	0.435578
Q9NWT6	HIF1AN	56		P22234	PAICS	0.427183		Q99497	PARK7	78		P62847	RPS24	0.435578
O94776	MTA2	55		P39748	FEN1	0.427111		P40227	CCT6A	78		Q07020	RPL18	0.435429
Q9Y383	LUC7L2	55		P84090	ERH	0.42704		O00267	SUPT5H	77		P25705	ATP5F1A	0.435429
Q9BUQ8	DDX23	55		O43143	DHX15	0.42704		Q05682	CALD1	77		O76094	SRP72	0.43528
P55209	NAP1L1	54		P29692	EEF1D	0.42704		Q6P2Q9	PRPF8	77		Q16531	DDB1	0.435206
O43143	DHX15	54		P62330	ARF6	0.426682		P61353	RPL27	77		O00303	EIF3F	0.435206
Q86XP3	DDX42	54		Q15637	SF1	0.426611		Q14203	DCTN1	77		P62701	RPS4X	0.435131
Q99873	PRMT1	54		P16949	STMN1	0.426539		P48643	CCT5	77		P61313	RPL15	0.434909
P32969	RPL9P9	54		Q9UQ35	SRRM2	0.426468		O43390	HNRNPR	76		O43493	TGOLN2	0.434612
P33991	MCM4	53		Q14677	CLINT1	0.426254		Q86V81	ALYREF	76		Q01082	SPTBN1	0.434612
Q99729	HNRNPAB	53		P51858	HDGF	0.42604		P56537	EIF6	76		O60884	DNAJA2	0.434538
P25685	DNAJB1	53		O60264	SMARCA5	0.42604		P62847	RPS24	76		P12270	TPR	0.434538
P55795	HNRNPH2	52		P62304	SNRPE	0.425969		P48634	PRRC2A	75		P05198	EIF2S1	0.434464
P13010	XRCC5	51		O94776	MTA2	0.425898		Q1KMD3	HNRNPUL2	75		P46779	RPL28	0.43439
Q96QK1	VPS35	51		P50570	DNM2	0.425827		Q8WVK2	SNRNP27	74		P62269	RPS18	0.434242
Q09666	AHNAK	51		Q15365	PCBP1	0.425685		P62841	RPS15	74		P83731	RPL24	0.434094
P21926	CD9	51		Q9UDY2	TJP2	0.425685		P17987	TCP1	74		P56537	EIF6	0.433799
Q5VYK3	ECPAS	51		P08865	RPSA	0.425614		O43172	PRPF4	74		Q15084	PDIA6	0.433725
Q9GZS3	SKIC8	51		Q7L576	CYFIP1	0.425188		O00159	MYO1C	73		Q9BUF5	TUBB6	0.433651
P41240	CSK	51		Q07157	TJP1	0.425117		P04406	GAPDH	73		Q14697	GANAB	0.433651
Q8TEQ6	GEMIN5	50		P27361	MAPK3	0.424833		P60866	RPS20	73		P20700	LMNB1	0.433503
Q9Y5L0	TNPO3	50		P03950	ANG	0.424763		Q14676	MDC1	73		Q02878	RPL6	0.43343
P43487	RANBP1	50		P61604	HSPE1	0.424692		P17096	HMGA1	72		P46781	RPS9	0.433356
P61962	DCAF7	50		Q7KZI7	MARK2	0.424621		O00560	SDCBP	72		P62857	RPS28	0.433282
Q9H1Y0	ATG5	50		O43399	TPD52L2	0.424197		Q09028	RBBP4	72		Q13177	PAK2	0.433209
P29692	EEF1D	49		Q9NQW6	ANLN	0.423985		Q07666	KHDRBS1	71		Q9UHX1	PUF60	0.433135
P31942	HNRNPH3	49		P23588	EIF4B	0.423915		P21860	ERBB3	71		P62888	RPL30	0.433062
P46937	YAP1	49		Q9HCM4	EPB41L5	0.423774		P62195	PSMC5	71		P62829	RPL23	0.433062
P25205	MCM3	48		Q8WYP5	AHCTF1	0.423633		O43290	SART1	71		Q13492	PICALM	0.433062
P62314	SNRPD1	48		Q13596	SNX1	0.423633		O75400	PRPF40A	71		Q9H307	PNN	0.432914
Q15365	PCBP1	47		Q86U42	PABPN1	0.423211		Q15020	SART3	71		Q9Y295	DRG1	0.432841
P55081	MFAP1	47		Q14C86	GAPVD1	0.423211		Q96KR1	ZFR	71		P49368	CCT3	0.432767
P31948	STIP1	47		Q8WWM7	ATXN2L	0.423071		P39023	RPL3	70		P51148	RAB5C	0.432694
P23528	CFL1	47		P26599	PTBP1	0.423		P46782	RPS5	70		Q07666	KHDRBS1	0.432621
P45973	CBX5	47		P61158	ACTR3	0.42293		Q9NZB2	FAM120A	70		Q9NZI8	IGF2BP1	0.432254
P49023	PXN	46		Q6UN15	FIP1L1	0.42286		P06493	CDK1	70		P37198	NUP62	0.432254
Q8WW12	PCNP	46		Q5BKZ1	ZNF326	0.42279		P43686	PSMC4	69		P41091	EIF2S3	0.432107
Q9H1E3	NUCKS1	46		Q9UHD1	CHORDC1	0.42272		P09661	SNRPA1	69		P52272	HNRNPM	0.432034
P53999	SUB1	46		Q9UQB8	BAIAP2	0.42258		P62244	RPS15A	69		Q96CW1	AP2M1	0.432034
P49736	MCM2	46		Q14847	LASP1	0.42258		Q92522	H1-10	69		O14974	PPP1R12A	0.432034
Q14254	FLOT2	46		P28340	POLD1	0.42237		Q15008	PSMD6	69		P62195	PSMC5	0.431595
Q6UN15	FIP1L1	46		P09382	LGALS1	0.4223		P62333	PSMC6	69		O95831	AIFM1	0.431449
P15531	NME1	46		Q9H3U1	UNC45A	0.42216		Q9UHX1	PUF60	69		Q13347	EIF3I	0.431449
Q9UQB8	BAIAP2	46		Q06124	PTPN11	0.42202		Q14152	EIF3A	69		P46778	RPL21	0.431376
P61158	ACTR3	46		P62879	GNB2	0.42195		Q92820	GGH	68		O43707	ACTN4	0.431376
P27816	MAP4	45		P53999	SUB1	0.421462		P46087	NOP2	68		P16989	YBX3	0.431303
P38646	HSPA9	45		Q02790	FKBP4	0.421322		Q02543	RPL18A	68		Q86V81	ALYREF	0.431157
P50570	DNM2	45		O95347	SMC2	0.421113		Q03135	CAV1	68		Q96AG4	LRRC59	0.431157
Q92945	KHSRP	45		Q12904	AIMP1	0.420974		Q99543	DNAJC2	68		Q15428	SF3A2	0.430938
P46109	CRKL	44		P23526	AHCY	0.420835		P62269	RPS18	67		Q9BSJ8	ESYT1	0.430938
P61221	ABCE1	44		O00422	SAP18	0.420766		Q9Y5B9	SUPT16H	67		A5YKK6	CNOT1	0.430793
O75937	DNAJC8	44		O14964	HGS	0.420627		Q96I25	RBM17	66		P18621	RPL17	0.43072
P62873	GNB1	43		P47914	RPL29	0.420627		O76024	WFS1	66		Q13501	SQSTM1	0.43072
P47914	RPL29	43		O75534	CSDE1	0.420558		P21802	FGFR2	66		Q8IWX8	CHERP	0.430574
Q8IWZ8	SUGP1	43		P63279	UBE2I	0.420488		P35998	PSMC2	66		P04843	RPN1	0.430502
O75554	WBP4	43		Q9UKX7	NUP50	0.420419		Q14108	SCARB2	66		P62266	RPS23	0.430211
O43765	SGTA	43		Q96I24	FUBP3	0.420073		P50991	CCT4	66		Q12874	SF3A3	0.430138
Q92598	HSPH1	42		P55010	EIF5	0.419934		Q93009	USP7	65		P51149	RAB7A	0.430138
Q9UKX7	NUP50	42		Q14157	UBAP2L	0.419796		Q13177	PAK2	65		P35998	PSMC2	0.429993
O00410	IPO5	42		O15143	ARPC1B	0.419727		Q9H8Y8	GORASP2	65		Q9H0D6	XRN2	0.429993
O43660	PLRG1	42		P32969	RPL9P9	0.419588		Q12874	SF3A3	65		P62333	PSMC6	0.429921
P17931	LGALS3	42		O95433	AHSA1	0.41945		P18124	RPL7	64		P61513	RPL37A	0.429703
P61081	UBE2M	42		Q8TEQ6	GEMIN5	0.419312		Q02878	RPL6	64		O95782	AP2A1	0.429703
P49327	FASN	42		Q9UKD2	MRTO4	0.419037		O00231	PSMD11	64		P24941	CDK2	0.429631
P62937	PPIA	42		P07737	PFN1	0.419037		Q9UKV3	ACIN1	64		O14744	PRMT5	0.429631
Q8IYB3	SRRM1	42		O96019	ACTL6A	0.418761		P50990	CCT8	64		Q9UKV3	ACIN1	0.429558
P25398	RPS12	42		P24534	EEF1B2	0.418555		P30050	RPL12	63		Q9ULW0	TPX2	0.429558
Q8WYP5	AHCTF1	42		P43487	RANBP1	0.418486		P19525	EIF2AK2	63		O43491	EPB41L2	0.429558
Q14244	MAP7	42		Q8IYB3	SRRM1	0.41828		Q5SSJ5	HP1BP3	63		Q9BQA1	WDR77	0.429486
Q7KZI7	MARK2	42		Q96T58	SPEN	0.417937		P24941	CDK2	62		Q93009	USP7	0.429414
Q9Y266	NUDC	42		P08579	SNRPB2	0.417869		Q6P1J9	CDC73	62		Q9ULX6	AKAP8L	0.429414
O60264	SMARCA5	42		P55081	MFAP1	0.4178		Q14204	DYNC1H1	62		O95819	MAP4K4	0.429414
Q8IX12	CCAR1	41		P35658	NUP214	0.4178		Q16531	DDB1	61		Q9HB71	CACYBP	0.429341
Q8N1F7	NUP93	41		P34897	SHMT2	0.4178		P14625	HSP90B1	61		P05023	ATP1A1	0.429269
Q16186	ADRM1	41		P32119	PRDX2	0.417595		Q15007	WTAP	61		Q99623	PHB2	0.429197
Q07157	TJP1	41		Q9H0C8	ILKAP	0.417595		Q9HCE1	MOV10	60		P47897	QARS1	0.429125
P22314	UBA1	41		O00299	CLIC1	0.417458		Q13895	BYSL	60		Q1KMD3	HNRNPUL2	0.42898
Q9UHD1	CHORDC1	41		Q9Y5L0	TNPO3	0.417253		Q15149	PLEC	60		P61247	RPS3A	0.428908
Q96T58	SPEN	41		P15531	NME1	0.417253		Q96GQ7	DDX27	60		Q92522	H1-10	0.428836
Q92499	DDX1	41		Q15366	PCBP2	0.417185		P28482	MAPK1	60		Q12931	TRAP1	0.428836
Q06330	RBPJ	41		Q9BUQ8	DDX23	0.417117		Q13347	EIF3I	60		P62861	FAU	0.428764
O75688	PPM1B	41		Q9UHD8	SEPTIN9	0.417117		P16989	YBX3	60		O60749	SNX2	0.428764
Q8N163	CCAR2	41		P35221	CTNNA1	0.417048		P20618	PSMB1	60		P46087	NOP2	0.428259
Q13185	CBX3	41		Q9NWB6	ARGLU1	0.41698		P37198	NUP62	60		P41252	IARS1	0.428259
Q969G3	SMARCE1	41		Q8TAQ2	SMARCC2	0.416844		P37108	SRP14	60		P09496	CLTA	0.428187
Q15046	KARS1	40		P61962	DCAF7	0.416708		P52272	HNRNPM	59		Q13523	PRP4K	0.428116
P13639	EEF2	40		P46379	BAG6	0.416367		O15372	EIF3H	59		Q6P2E9	EDC4	0.428116
Q05639	EEF1A2	40		Q8WW12	PCNP	0.416367		P61289	PSME3	59		Q6P2Q9	PRPF8	0.428044
Q9Y3F4	STRAP	40		Q6PJT7	ZC3H14	0.416299		Q9ULW0	TPX2	59		Q15437	SEC23B	0.428044
Q9C0J8	WDR33	40		O43660	PLRG1	0.416299		O43242	PSMD3	59		P42566	EPS15	0.427972
Q9UDY2	TJP2	40		O43765	SGTA	0.416231		P17980	PSMC3	59		Q92841	DDX17	0.4279
P35221	CTNNA1	39		Q9ULV4	CORO1C	0.416027		P78527	PRKDC	59		Q15007	WTAP	0.427828
Q53GS9	USP39	39		Q9UNZ2	NSFL1C	0.416027		Q7L2H7	EIF3M	58		Q14683	SMC1A	0.427828
O15144	ARPC2	39		Q86XP3	DDX42	0.415892		O15371	EIF3D	58		P46060	RANGAP1	0.427685
Q9H3U1	UNC45A	39		O14776	TCERG1	0.415824		P51149	RAB7A	58		Q14152	EIF3A	0.427613
Q8N7H5	PAF1	39		P78347	GTF2I	0.415756		P08581	MET	58		P22061	PCMT1	0.427469
Q06830	PRDX1	39		Q8N684	CPSF7	0.41562		P62829	RPL23	58		Q96P70	IPO9	0.427398
O43795	MYO1B	38		P25398	RPS12	0.415553		P62857	RPS28	58		O60832	DKC1	0.427326
O96019	ACTL6A	38		P54136	RARS1	0.41535		Q8N3V7	SYNPO	58		P50991	CCT4	0.427326
P50395	GDI2	38		O43795	MYO1B	0.415079		P83731	RPL24	58		Q9H444	CHMP4B	0.427326
Q14677	CLINT1	38		P10321	HLA-C	0.415011		P60228	EIF3E	57		P53618	COPB1	0.427326
Q8N684	CPSF7	38		P11586	MTHFD1	0.415011		Q9UBQ5	EIF3K	57		P15924	DSP	0.427254
O15143	ARPC1B	38		Q9P258	RCC2	0.414876		P46778	RPL21	57		P60228	EIF3E	0.427183
P23588	EIF4B	38		P61221	ABCE1	0.414606		Q9H444	CHMP4B	56		O95373	IPO7	0.427111
P82979	SARNP	38		Q9UJU6	DBNL	0.414269		Q92734	TFG	56		Q5SSJ5	HP1BP3	0.426897
O43684	BUB3	38		Q14166	TTLL12	0.414269		P55036	PSMD4	56		Q86UP2	KTN1	0.426897
Q8WWM7	ATXN2L	38		Q9Y285	FARSA	0.414135		P61964	WDR5	56		Q96KR1	ZFR	0.426754
Q15654	TRIP6	37		Q96AE4	FUBP1	0.413933		Q96CW1	AP2M1	56		Q14203	DCTN1	0.426682
P33992	MCM5	37		Q92769	HDAC2	0.413732		P54764	EPHA4	56		P13693	TPT1	0.426611
Q7Z4V5	HDGFL2	37		O43396	TXNL1	0.413396		Q12931	TRAP1	55		P07814	EPRS1	0.426611
Q86U42	PABPN1	37		P26583	HMGB2	0.413262		P04439	HLA-A	55		P40926	MDH2	0.426539
P55212	CASP6	37		Q8IX12	CCAR1	0.413262		P29317	EPHA2	55		O75369	FLNB	0.426397
P26599	PTBP1	37		Q9UL25	RAB21	0.413262		P51148	RAB5C	55		Q8WUM4	PDCD6IP	0.426325
P32119	PRDX2	36		Q14258	TRIM25	0.413262		P62266	RPS23	55		Q92616	GCN1	0.426254
O14776	TCERG1	36		P41227	NAA10	0.413195		O75787	ATP6AP2	55		P30101	PDIA3	0.426112
P98175	RBM10	36		Q9Y5K6	CD2AP	0.412994		O00629	KPNA4	55		Q01813	PFKP	0.426112
O43175	PHGDH	36		Q15185	PTGES3	0.412727		P42224	STAT1	55		O76021	RSL1D1	0.42604
O00264	PGRMC1	36		P27708	CAD	0.41266		O75368	SH3BGRL	55		Q5T4S7	UBR4	0.425898
O60925	PFDN1	35		Q01518	CAP1	0.41266		Q15714	TSC22D1	54		P20042	EIF2S2	0.425827
Q13242	SRSF9	35		Q15058	KIF14	0.412526		P39656	DDOST	54		P19525	EIF2AK2	0.425685
Q06124	PTPN11	35		Q16658	FSCN1	0.41246		Q13153	PAK1	54		P53621	COPA	0.425543
Q8IYD1	GSPT2	35		Q9UM54	MYO6	0.412259		Q92841	DDX17	54		P14868	DARS1	0.425472
P39748	FEN1	35		O95757	HSPA4L	0.412193		P22392	NME2	54		Q9UBQ5	EIF3K	0.425401
Q9UKL0	RCOR1	35		Q6P3W7	SCYL2	0.412126		Q9ULX6	AKAP8L	54		O00159	MYO1C	0.42533
P58546	MTPN	35		P62633	CNBP	0.411727		P30086	PEBP1	54		P37108	SRP14	0.425259
Q16576	RBBP7	35		Q02241	KIF23	0.411394		Q96FJ2	DYNLL2	53		Q00325	SLC25A3	0.425188
O60684	KPNA6	34		P63151	PPP2R2A	0.411195		O00303	EIF3F	53		Q9HCE1	MOV10	0.425046
Q15758	SLC1A5	34		P33316	DUT	0.411063		O14974	PPP1R12A	53		P78344	EIF4G2	0.424975
Q9H2P0	ADNP	34		P05783	KRT18	0.410996		P04843	RPN1	53		O43172	PRPF4	0.424833
Q9UKD2	MRTO4	34		O94832	MYO1D	0.410996		P62191	PSMC1	53		P21860	ERBB3	0.424833
P22234	PAICS	34		P62314	SNRPD1	0.410665		Q9Y3B4	SF3B6	53		O43290	SART1	0.424833
Q13155	AIMP2	34		Q05639	EEF1A2	0.410467		Q5UIP0	RIF1	53		P27797	CALR	0.424833
Q8WUD4	CCDC12	34		P07949	RET	0.410401		P62820	RAB1A	52		Q9Y2Z0	SUGT1	0.424692
Q9ULV4	CORO1C	34		P49736	MCM2	0.410401		Q9NQ29	LUC7L	52		P46459	NSF	0.42455
Q6P3W7	SCYL2	34		O43684	BUB3	0.410401		P55072	VCP	52		Q15008	PSMD6	0.42448
P10909	CLU	34		P53004	BLVRA	0.410269		Q86UP2	KTN1	52		Q7L2H7	EIF3M	0.42448
P10253	GAA	34		Q13185	CBX3	0.410203		Q9H2U1	DHX36	52		P08195	SLC3A2	0.42448
P35658	NUP214	34		P82979	SARNP	0.410071		Q9UNM6	PSMD13	52		Q9NZB2	FAM120A	0.424338
Q15942	ZYX	34		P49023	PXN	0.409873		O60884	DNAJA2	52		Q9UQE7	SMC3	0.424338
P54136	RARS1	34		P00558	PGK1	0.409807		Q9BQA1	WDR77	52		Q5JTV8	TOR1AIP1	0.424338
O43670	ZNF207	34		Q13155	AIMP2	0.409478		Q9BUJ2	HNRNPUL1	52		Q15645	TRIP13	0.424268
O43809	NUDT21	34		Q9Y2X3	NOP58	0.409412		P30101	PDIA3	52		P17096	HMGA1	0.424056
Q12904	AIMP1	33		P45973	CBX5	0.409346		Q13123	IK	51		O15234	CASC3	0.424056
P21246	PTN	33		O43809	NUDT21	0.409346		P24928	POLR2A	51		P09211	GSTP1	0.424056
Q13045	FLII	33		Q14126	DSG2	0.409281		P05198	EIF2S1	51		P06753	TPM3	0.423915
Q9NPD3	EXOSC4	33		Q9GZS3	SKIC8	0.408821		P34932	HSPA4	51		P22392	NME2	0.423844
P61604	HSPE1	33		P62873	GNB1	0.408756		O43707	ACTN4	51		Q15020	SART3	0.423703
Q8TAQ2	SMARCC2	33		P33992	MCM5	0.408756		Q04721	NOTCH2	51		P62820	RAB1A	0.423703
Q9UBL3	ASH2L	33		Q8WXX5	DNAJC9	0.408756		O14744	PRMT5	50		P17612	PRKACA	0.423703
Q14C86	GAPVD1	32		O95486	SEC24A	0.40869		Q9BRJ6	C7orf50	50		P35580	MYH10	0.423703
Q8WYA6	CTNNBL1	32		O75175	CNOT3	0.40869		P53621	COPA	50		O00231	PSMD11	0.423492
P17693	HLA-G	32		O75688	PPM1B	0.408494		P10599	TXN	50		P42224	STAT1	0.423492
P31150	GDI1	32		Q15181	PPA1	0.408428		P50454	SERPINH1	50		Q9Y5Q8	GTF3C5	0.423492
P27708	CAD	32		Q9H2P0	ADNP	0.408232		Q99575	POP1	50		P00338	LDHA	0.423492
O95347	SMC2	32		Q01105	SET	0.408232		Q9UHD9	UBQLN2	50		Q9NYL9	TMOD3	0.423422
Q01105	SET	32		Q16181	SEPTIN7	0.408232		Q8IZP0	ABI1	49		P62841	RPS15	0.423281
P41227	NAA10	32		Q8N7H5	PAF1	0.408101		P31689	DNAJA1	49		Q9Y6G9	DYNC1LI1	0.423281
P04075	ALDOA	32		O43670	ZNF207	0.408101		O15234	CASC3	49		P55060	CSE1L	0.423211
Q9H814	PHAX	32		P26639	TARS1	0.408101		Q9Y5K5	UCHL5	49		Q6P1J9	CDC73	0.423141
P28340	POLD1	32		P83916	CBX1	0.40784		P51610	HCFC1	49		Q15424	SAFB	0.423141
Q15366	PCBP2	32		Q13045	FLII	0.40784		P07237	P4HB	49		P49411	TUFM	0.423071
P78347	GTF2I	32		Q969G3	SMARCE1	0.407644		Q96CT7	CCDC124	49		Q9BUJ2	HNRNPUL1	0.423
Q14126	DSG2	31		P62826	RAN	0.407579		P47897	QARS1	49		P35916	FLT4	0.42293
Q02790	FKBP4	31		P50395	GDI2	0.407254		P49750	YLPM1	49		Q96I25	RBM17	0.42293
P63151	PPP2R2A	31		O15144	ARPC2	0.407188		Q9H0D6	XRN2	49		P18124	RPL7	0.42286
P14618	PKM	31		P30044	PRDX5	0.407188		P49720	PSMB3	49		P35613	BSG	0.42286
O95456	PSMG1	31		Q14244	MAP7	0.407123		Q15811	ITSN1	49		P53396	ACLY	0.42286
P35813	PPM1A	31		Q3YEC7	RABL6	0.406539		P35613	BSG	49		Q05682	CALD1	0.42279
P34897	SHMT2	31		P49588	AARS1	0.40628		O75150	RNF40	49		O15371	EIF3D	0.42272
Q9Y2X3	NOP58	30		P31153	MAT2A	0.40615		P30876	POLR2B	49		Q86UE4	MTDH	0.42265
Q9H0C8	ILKAP	30		Q96EP5	DAZAP1	0.405698		Q9Y262	EIF3L	49		Q9NXV6	CDKN2AIP	0.42265
P07737	PFN1	30		Q15056	EIF4H	0.405633		O00505	KPNA3	49		Q9Y520	PRRC2C	0.42258
P98179	RBM3	30		P46937	YAP1	0.405569		O14579	COPE	49		Q14566	MCM6	0.42258
Q7L576	CYFIP1	30		Q9BXJ9	NAA15	0.405375		P63173	RPL38	49		Q92973	TNPO1	0.42258
Q7RTV0	PHF5A	30		Q10570	CPSF1	0.405311		Q96MU7	YTHDC1	49		Q9UKG1	APPL1	0.42244
Q9NWH9	SLTM	30		Q13242	SRSF9	0.404989		P10155	RO60	49		P51610	HCFC1	0.42237
P27695	APEX1	30		Q9H9A6	LRRC40	0.404925		O00487	PSMD14	48		Q92922	SMARCC1	0.42237
O95433	AHSA1	30		P07339	CTSD	0.404796		Q1ED39	KNOP1	48		P60660	MYL6	0.4223
Q9BWU0	SLC4A1AP	29		O00151	PDLIM1	0.404603		Q9UMX0	UBQLN1	48		Q86YP4	GATAD2A	0.42216
Q86X55	CARM1	29		Q53GS9	USP39	0.404282		P49184	DNASE1L1	48		P17980	PSMC3	0.42209
O75886	STAM2	29		Q96T23	RSF1	0.404154		P49721	PSMB2	48		P18754	RCC1	0.42209
Q8WXX5	DNAJC9	29		O94906	PRPF6	0.40409		P25705	ATP5F1A	48		P25786	PSMA1	0.42188
Q14157	UBAP2L	29		O00264	PGRMC1	0.404026		Q9NR12	PDLIM7	48		Q13123	IK	0.42181
Q86X29	LSR	29		Q7Z4V5	HDGFL2	0.40377		O14818	PSMA7	48		P06733	ENO1	0.421741
Q15058	KIF14	29		Q92541	RTF1	0.40377		Q14683	SMC1A	47		P53985	SLC16A1	0.421601
Q9Y5K6	CD2AP	29		O60869	EDF1	0.40377		P98172	EFNB1	47		P78406	RAE1	0.421531
O00401	WASL	29		O00154	ACOT7	0.403578		O60341	KDM1A	47		P07195	LDHB	0.421531
Q9UNZ2	NSFL1C	29		Q15208	STK38	0.40345		P49755	TMED10	47		Q02543	RPL18A	0.421462
Q96I24	FUBP3	29		Q9NYB0	TERF2IP	0.403259		P07305	H1-0	47		P30086	PEBP1	0.421392
P18583	SON	29		Q9UKL0	RCOR1	0.403195		P62861	FAU	47		P45880	VDAC2	0.421113
Q8N954	GPATCH11	29		P08243	ASNS	0.403195		O94992	HEXIM1	47		P48444	ARCN1	0.421113
P05783	KRT18	29		O95232	LUC7L3	0.40294		Q9Y2Z0	SUGT1	47		P61163	ACTR1A	0.421044
Q13596	SNX1	29		O60684	KPNA6	0.402813		P11717	IGF2R	47		O60763	USO1	0.421044
Q9UJU6	DBNL	29		Q92785	DPF2	0.402813		P42566	EPS15	47		O15372	EIF3H	0.420905
Q9UL25	RAB21	29		Q9NWH9	SLTM	0.402749		Q9UKG1	APPL1	47		P30876	POLR2B	0.420696
P16949	STMN1	29		Q5T200	ZC3H13	0.402749		P46060	RANGAP1	47		O75367	MACROH2A1	0.420558
P19174	PLCG1	28		Q14738	PPP2R5D	0.402622		P41743	PRKCI	47		P49321	NASP	0.420419
P52735	VAV2	28		Q9NWT6	HIF1AN	0.402495		P60900	PSMA6	47		P12268	IMPDH2	0.420419
Q14011	CIRBP	28		Q15369	ELOC	0.402495		P08708	RPS17	47		P12814	ACTN1	0.42035
Q9Y5U2	TSSC4	28		Q92614	MYO18A	0.402368		Q00341	HDLBP	46		Q9Y224	RTRAF	0.42035
P54578	USP14	28		Q9P2M7	CGN	0.402241		Q9Y4E8	USP15	46		Q06265	EXOSC9	0.420211
Q96E39	RBMXL1	28		P98175	RBM10	0.40186		Q14008	CKAP5	46		P49750	YLPM1	0.420142
P05787	KRT8	28		Q9C0J8	WDR33	0.401734		P51665	PSMD7	46		Q9UPN3	MACF1	0.420073
P24534	EEF1B2	28		P18583	SON	0.401417		Q13011	ECH1	46		P33176	KIF5B	0.420003
O94832	MYO1D	28		O75607	NPM3	0.400849		P29350	PTPN6	46		Q96CT7	CCDC124	0.419796
Q10570	CPSF1	28		Q8IWZ8	SUGP1	0.400786		Q9Y520	PRRC2C	46		P24928	POLR2A	0.419727
P18887	XRCC1	27		Q9BR76	CORO1B	0.400786		Q96KQ7	EHMT2	46		O00567	NOP56	0.41945
P33240	CSTF2	27		Q9NTK5	OLA1	0.400786		P18754	RCC1	46		Q13451	FKBP5	0.419381
Q15208	STK38	27		Q06330	RBPJ	0.40066		Q13257	MAD2L1	46		P41743	PRKCI	0.419381
Q92541	RTF1	27		O14929	HAT1	0.400597		Q99623	PHB2	46		P55265	ADAR	0.419312
Q8IVD9	NUDCD3	27		Q9UKN8	GTF3C4	0.400408		P06730	EIF4E	46		Q14671	PUM1	0.419312
Q9UKN8	GTF3C4	27		P35813	PPM1A	0.400157		O60508	CDC40	46		P27694	RPA1	0.419312
O75534	CSDE1	27		O75886	STAM2	0.400157		Q14566	MCM6	46		Q9P2E9	RRBP1	0.419243
Q99549	MPHOSPH8	27		O75717	WDHD1	0.400157		O76071	CIAO1	46		O94992	HEXIM1	0.419174
Q14847	LASP1	27		O00203	AP3B1	0.400094		P42285	MTREX	46		P17812	CTPS1	0.419106
O95757	HSPA4L	27		Q86X29	LSR	0.399843		Q9NWT1	PAK1IP1	46		P50579	METAP2	0.419037
Q8ND56	LSM14A	26		Q9UBL3	ASH2L	0.399342		P51608	MECP2	46		Q9BTC0	DIDO1	0.418899
O95486	SEC24A	26		Q9UKK9	NUDT5	0.399154		P41252	IARS1	45		Q13895	BYSL	0.41883
O43396	TXNL1	26		Q9H814	PHAX	0.399092		P30622	CLIP1	45		Q9Y3B4	SF3B6	0.41883
Q6UXN9	WDR82	26		Q12996	CSTF3	0.399092		P02786	TFRC	45		P42285	MTREX	0.418693
O95352	ATG7	26		Q16576	RBBP7	0.399029		P28066	PSMA5	45		Q9BRJ6	C7orf50	0.418555
Q15291	RBBP5	26		Q12802	AKAP13	0.399029		O95373	IPO7	45		Q5T6F2	UBAP2	0.418486
Q02241	KIF23	25		O95163	ELP1	0.39878		Q96RS6	NUDCD1	45		Q9Y5A9	YTHDF2	0.418486
O75436	VPS26A	25		Q9NTZ6	RBM12	0.398717		Q13501	SQSTM1	45		P83105	HTRA4	0.418349
Q9C0C4	SEMA4C	25		Q9Y2X7	GIT1	0.398593		P50613	CDK7	45		O00267	SUPT5H	0.418349
Q16181	SEPTIN7	25		P53992	SEC24C	0.398468		Q9GZZ9	UBA5	45		Q9P2J5	LARS1	0.418349
Q96AE4	FUBP1	25		Q8IVD9	NUDCD3	0.398157		Q15424	SAFB	45		Q14839	CHD4	0.418143
Q15334	LLGL1	25		P52209	PGD	0.398095		P49207	RPL34	45		P18206	VCL	0.418074
Q14653	IRF3	25		P05787	KRT8	0.397784		Q9UNE7	STUB1	44		Q9H9B1	EHMT1	0.418006
Q8WVC0	LEO1	25		P18887	XRCC1	0.397722		P18031	PTPN1	44		P63220	RPS21	0.417869
Q9P2M7	CGN	25		O15212	PFDN6	0.397722		O75367	MACROH2A1	44		O95425	SVIL	0.417732
Q9BRP4	PAAF1	25		P35269	GTF2F1	0.39766		Q9HB71	CACYBP	44		Q9H2G2	SLK	0.417732
O75717	WDHD1	25		P30084	ECHS1	0.39766		P05023	ATP1A1	44		Q99733	NAP1L4	0.417732
P42025	ACTR1B	25		Q9BQ61	TRIR	0.397226		P20042	EIF2S2	44		P43686	PSMC4	0.417595
O43865	AHCYL1	24		P82970	HMGN5	0.397164		P55265	ADAR	44		Q05209	PTPN12	0.417458
O95104	SCAF4	24		Q9UJA5	TRMT6	0.397102		P25787	PSMA2	44		Q5VTR2	RNF20	0.417458
Q96T23	RSF1	24		P49006	MARCKSL1	0.39704		Q99436	PSMB7	44		O00629	KPNA4	0.41739
O00203	AP3B1	24		P27695	APEX1	0.396917		Q9BTC0	DIDO1	44		Q10567	AP1B1	0.41739
P35269	GTF2F1	24		Q9H1Y0	ATG5	0.396793		P51572	BCAP31	43		P26358	DNMT1	0.41739
Q9H0U4	RAB1B	24		Q86X55	CARM1	0.396732		Q6NZY4	ZCCHC8	43		P13861	PRKAR2A	0.41739
Q14258	TRIM25	24		P31939	ATIC	0.396361		P28074	PSMB5	43		Q9H3P7	ACBD3	0.417322
Q9UM54	MYO6	24		P13984	GTF2F2	0.3963		Q86Y82	STX12	43		Q9Y678	COPG1	0.417185
O75175	CNOT3	24		O75436	VPS26A	0.395992		Q01082	SPTBN1	43		Q13153	PAK1	0.417117
Q9UHD8	SEPTIN9	24		Q9BRP8	PYM1	0.395807		Q9Y4Z0	LSM4	43		Q9Y262	EIF3L	0.417117
O15212	PFDN6	24		O75937	DNAJC8	0.3955		O14672	ADAM10	43		Q8N3V7	SYNPO	0.417048
P05154	SERPINA5	24		Q9NSD9	FARSB	0.3955		Q06418	TYRO3	43		O00505	KPNA3	0.417048
Q15181	PPA1	23		P84085	ARF5	0.395316		Q92973	TNPO1	43		P39656	DDOST	0.41698
Q5T200	ZC3H13	23		P35568	IRS1	0.395316		Q04837	SSBP1	43		Q14676	MDC1	0.416912
Q15369	ELOC	23		P10768	ESD	0.395316		Q01973	ROR1	43		P20618	PSMB1	0.416844
P16220	CREB1	23		Q15334	LLGL1	0.395071		O95819	MAP4K4	43		Q08380	LGALS3BP	0.416776
Q66PJ3	ARL6IP4	23		P52594	AGFG1	0.395071		Q9UQE7	SMC3	43		Q9H2U1	DHX36	0.416639
P13497	BMP1	23		Q08752	PPID	0.394765		P28070	PSMB4	42		O75150	RNF40	0.416367
Q8NC96	NECAP1	23		Q9Y3L5	RAP2C	0.394582		Q00577	PURA	42		P08708	RPS17	0.416367
Q92785	DPF2	23		Q9H0U4	RAB1B	0.394521		P12830	CDH1	42		Q04721	NOTCH2	0.416299
O95989	NUDT3	23		Q14011	CIRBP	0.393729		Q9NYL9	TMOD3	42		P30048	PRDX3	0.416231
P11586	MTHFD1	23		O75475	PSIP1	0.393607		P46459	NSF	42		Q9NR09	BIRC6	0.416163
P13984	GTF2F2	23		Q16186	ADRM1	0.393364		O60716	CTNND1	42		Q7L014	DDX46	0.416095
Q9H9A6	LRRC40	23		Q66PJ3	ARL6IP4	0.393122		P17612	PRKACA	42		Q96GQ7	DDX27	0.41596
Q8TBA6	GOLGA5	23		Q9H1E3	NUCKS1	0.393		Q12792	TWF1	42		Q92576	PHF3	0.41596
Q9BR76	CORO1B	23		P49591	SARS1	0.392819		P27797	CALR	42		Q9H6T3	RPAP3	0.41596
O75083	WDR1	22		Q9BZK7	TBL1XR1	0.392577		P84095	RHOG	41		P49207	RPL34	0.415892
Q9NR45	NANS	22		Q9BWU0	SLC4A1AP	0.392516		Q9NXV6	CDKN2AIP	41		Q6NZY4	ZCCHC8	0.415892
P36405	ARL3	22		Q92688	ANP32B	0.392516		P43307	SSR1	41		Q9NQG5	RPRD1B	0.415688
Q9NTZ6	RBM12	22		Q9NX02	NLRP2	0.391792		P18206	VCL	41		Q92620	DHX38	0.415688
Q8N8S7	ENAH	22		P58546	MTPN	0.391672		O95425	SVIL	41		Q15075	EEA1	0.41562
O60828	PQBP1	22		P10909	CLU	0.391612		O75955	FLOT1	41		Q9Y4E8	USP15	0.415553
P08727	KRT19	22		P63241	EIF5A	0.391431		P49756	RBM25	41		Q9BXS5	AP1M1	0.415485
P35080	PFN2	22		P16152	CBR1	0.391371		Q06323	PSME1	41		P63173	RPL38	0.415417
O14936	CASK	22		O75083	WDR1	0.391191		Q9NQG5	RPRD1B	41		Q8TEM1	NUP210	0.415417
P61758	VBP1	22		Q8N3X1	FNBP4	0.390831		P22061	PCMT1	41		O00560	SDCBP	0.41535
Q53HC9	EIPR1	22		Q01085	TIAL1	0.390591		Q5JSZ5	PRRC2B	41		Q15436	SEC23A	0.41535
P84085	ARF5	22		P45974	USP5	0.390532		Q9UNP9	PPIE	40		Q15375	EPHA7	0.415214
Q9Y2X7	GIT1	22		Q15942	ZYX	0.390472		O95782	AP2A1	40		Q00577	PURA	0.415214
P23142	FBLN1	21		P52735	VAV2	0.390412		Q05209	PTPN12	40		Q14240	EIF4A2	0.415147
Q9Y285	FARSA	21		Q9Y6E2	BZW2	0.390352		O43491	EPB41L2	40		O14818	PSMA7	0.415079
Q16658	FSCN1	21		P06454	PTMA	0.390352		P63220	RPS21	40		Q7Z6Z7	HUWE1	0.415079
Q12996	CSTF3	21		P19174	PLCG1	0.390233		P25788	PSMA3	40		Q8IZP0	ABI1	0.414944
Q9P258	RCC2	21		O43865	AHCYL1	0.390173		P18085	ARF4	40		P09661	SNRPA1	0.414809
Q9BQ61	TRIR	21		P98179	RBM3	0.390113		P61163	ACTR1A	40		O15160	POLR1C	0.414809
Q96ST2	IWS1	21		Q8ND56	LSM14A	0.390054		O75822	EIF3J	40		P50402	EMD	0.414809
Q13371	PDCL	21		P33240	CSTF2	0.389994		Q96P70	IPO9	39		Q9P2N5	RBM27	0.414674
O14745	NHERF1	21		O75874	IDH1	0.389934		P27105	STOM	39		Q14137	BOP1	0.414606
Q5TAQ9	DCAF8	21		Q15291	RBBP5	0.389755		Q00325	SLC25A3	39		O14579	COPE	0.414539
Q9BXJ9	NAA15	21		Q9H223	EHD4	0.389755		Q9Y6G9	DYNC1LI1	39		Q9NR12	PDLIM7	0.414539
Q92542	NCSTN	21		Q8N1G4	LRRC47	0.389696		Q86YP4	GATAD2A	39		Q9HAV4	XPO5	0.414539
O00299	CLIC1	21		P04899	GNAI2	0.389458		Q14839	CHD4	39		Q5JSZ5	PRRC2B	0.414472
P23526	AHCY	21		Q8WUD4	CCDC12	0.389042		Q92922	SMARCC1	39		P52701	MSH6	0.414269
P31153	MAT2A	21		O94874	UFL1	0.389042		Q15084	PDIA6	39		Q96KQ7	EHMT2	0.414202
P42574	CASP3	21		P23381	WARS1	0.388686		P14868	DARS1	39		Q9UBB4	ATXN10	0.414068
Q8N9N8	EIF1AD	20		P23193	TCEA1	0.388626		Q99590	SCAF11	39		Q9H3S7	PTPN23	0.413933
O00151	PDLIM1	20		P35080	PFN2	0.388567		Q9H3N1	TMX1	39		Q9C0C2	TNKS1BP1	0.413933
Q12802	AKAP13	20		Q13085	ACACA	0.388508		O15160	POLR1C	39		P14314	PRKCSH	0.413933
P00558	PGK1	20		Q99549	MPHOSPH8	0.388389		Q15075	EEA1	39		P21802	FGFR2	0.413732
O94888	UBXN7	20		P07741	APRT	0.387976		O15145	ARPC3	38		Q9Y5X1	SNX9	0.413664
O95163	ELP1	20		Q15654	TRIP6	0.387917		A5YKK6	CNOT1	38		P54652	HSPA2	0.413597
Q92673	SORL1	20		P51003	PAPOLA	0.38774		Q14192	FHL2	38		Q96SI9	STRBP	0.413597
P05090	APOD	20		P36405	ARL3	0.387681		P60510	PPP4C	38		P42166	TMPO	0.413597
P35625	TIMP3	20		P61758	VBP1	0.387209		Q9BSJ8	ESYT1	38		Q9H3P2	NELFA	0.413597
Q08752	PPID	20		P42574	CASP3	0.386974		Q14137	BOP1	38		P43307	SSR1	0.41353
O95197	RTN3	20		P11441	UBL4A	0.386857		Q9BUF5	TUBB6	38		Q9ULU4	ZMYND8	0.413463
Q969U7	PSMG2	20		Q6VY07	PACS1	0.386798		Q9NPF4	OSGEP	38		P49915	GMPS	0.413463
P30084	ECHS1	20		Q8N954	GPATCH11	0.386212		P12814	ACTN1	38		Q9NQ29	LUC7L	0.413396
Q6P996	PDXDC1	20		Q8WYA6	CTNNBL1	0.386037		P07814	EPRS1	38		P41250	GARS1	0.413396
O95232	LUC7L3	19		Q00688	FKBP3	0.385861		Q9Y490	TLN1	38		Q12768	WASHC5	0.413329
Q9UJW0	DCTN4	19		P08727	KRT19	0.385745		P06753	TPM3	38		P15170	GSPT1	0.413262
Q14738	PPP2R5D	19		Q9H6Z4	RANBP3	0.38557		Q96KG9	SCYL1	38		P07305	H1-0	0.413128
Q12955	ANK3	19		Q92673	SORL1	0.385395		P05556	ITGB1	38		Q9HCN8	SDF2L1	0.413061
Q9Y2T2	AP3M1	19		P42025	ACTR1B	0.384871		Q13492	PICALM	38		P52565	ARHGDIA	0.412994
O94874	UFL1	19		Q06203	PPAT	0.384755		Q9UPT8	ZC3H4	38		P30041	PRDX6	0.412994
P49006	MARCKSL1	19		Q9UEE9	CFDP1	0.384697		Q9Y224	RTRAF	37		Q5UIP0	RIF1	0.412927
P11441	UBL4A	19		Q96E39	RBMXL1	0.384291		Q14697	GANAB	37		P05556	ITGB1	0.412927
O75475	PSIP1	19		Q96IJ6	GMPPA	0.384233		Q99523	SORT1	37		P56192	MARS1	0.412794
P42167	TMPO	19		O95104	SCAF4	0.384001		Q92576	PHF3	37		P29144	TPP2	0.412794
Q7L5D6	GET4	19		P40818	USP8	0.38377		Q9H074	PAIP1	37		Q99590	SCAF11	0.412727
Q8N3X1	FNBP4	19		P19623	SRM	0.383654		Q6P2E9	EDC4	37		P08581	MET	0.41266
Q96L92	SNX27	19		Q9UN81	L1RE1	0.383481		Q14118	DAG1	37		O00487	PSMD14	0.412593
O00170	AIP	19		P46736	BRCC3	0.383481		Q9Y6E0	STK24	37		Q8WXH0	SYNE2	0.412526
Q14651	PLS1	19		Q9Y2T2	AP3M1	0.383424		Q6IN85	PPP4R3A	37		P37802	TAGLN2	0.412526
P53004	BLVRA	19		Q9Y263	PLAA	0.382905		Q06265	EXOSC9	37		Q8WVK2	SNRNP27	0.41246
O43399	TPD52L2	19		P31150	GDI1	0.38256		Q9P206	NHSL3	37		Q96FJ2	DYNLL2	0.412393
Q9BRP8	PYM1	19		P00492	HPRT1	0.38256		Q96SI9	STRBP	37		P29401	TKT	0.412326
O43681	GET3	19		P21246	PTN	0.382446		Q14240	EIF4A2	37		P60900	PSMA6	0.412259
P00966	ASS1	19		O00170	AIP	0.382446		Q96AG4	LRRC59	36		Q8TEX9	IPO4	0.412259
Q8NFH4	NUP37	18		P11413	G6PD	0.382446		O15084	ANKRD28	36		Q14232	EIF2B1	0.412126
P51809	VAMP7	18		P40222	TXLNA	0.382274		Q9P2E9	RRBP1	36		Q99615	DNAJC7	0.412059
Q8WUF5	PPP1R13L	18		Q96ST2	IWS1	0.382216		Q9Y5Q8	GTF3C5	36		Q7Z478	DHX29	0.412059
P17480	UBTF	18		Q6NUS6	TCTN3	0.382159		Q13438	OS9	36		O95747	OXSR1	0.411993
Q01518	CAP1	18		Q5T0N5	FNBP1L	0.382159		Q9C0C9	UBE2O	36		O75390	CS	0.411993
P30044	PRDX5	18		Q8WUF5	PPP1R13L	0.38193		Q9H6T3	RPAP3	36		P55036	PSMD4	0.411594
Q13332	PTPRS	18		Q9NTI5	PDS5B	0.381815		Q7KZ85	SUPT6H	36		O60341	KDM1A	0.411527
Q9Y3L5	RAP2C	18		Q07866	KLC1	0.381758		P27448	MARK3	36		P49756	RBM25	0.411527
Q8N1G4	LRRC47	18		P18433	PTPRA	0.381758		P12270	TPR	36		Q3MHD2	LSM12	0.411461
Q13951	CBFB	18		Q6P996	PDXDC1	0.381301		P50402	EMD	36		Q06323	PSME1	0.411262
Q92688	ANP32B	18		Q9NR45	NANS	0.381073		Q15262	PTPRK	36		P51531	SMARCA2	0.411262
Q07866	KLC1	18		O60245	PCDH7	0.381016		Q9UPN9	TRIM33	36		P21709	EPHA1	0.411195
O43505	B4GAT1	18		P13489	RNH1	0.380846		P33176	KIF5B	36		P28066	PSMA5	0.411195
Q9NVX2	NLE1	18		Q15819	UBE2V2	0.380789		Q9H9B1	EHMT1	36		Q9UPT8	ZC3H4	0.411195
Q9UEE9	CFDP1	18		P39687	ANP32A	0.380618		P78344	EIF4G2	36		P43034	PAFAH1B1	0.411063
Q8N5I2	ARRDC1	18		Q15417	CNN3	0.380448		Q15018	ABRAXAS2	36		P61106	RAB14	0.41093
Q8IWU5	SULF2	18		P05154	SERPINA5	0.380334		P59998	ARPC4	36		Q9UHR4	BAIAP2L1	0.410599
Q9Y240	CLEC11A	18		O75554	WBP4	0.380277		Q92620	DHX38	36		Q14108	SCARB2	0.410401
P05026	ATP1B1	18		Q9Y5Y6	ST14	0.380107		P06396	GSN	36		P49721	PSMB2	0.410401
Q8NFH3	NUP43	17		Q8N8S7	ENAH	0.379598		O95817	BAG3	35		P55196	AFDN	0.410401
P16152	CBR1	17		O15347	HMGB3	0.379541		P54105	CLNS1A	35		P26640	VARS1	0.410401
P21741	MDK	17		Q9UL15	BAG5	0.379428		P61106	RAB14	35		Q13561	DCTN2	0.410335
P53992	SEC24C	17		O00186	STXBP3	0.379372		O75369	FLNB	35		P15927	RPA2	0.410269
P13489	RNH1	17		Q9NPD3	EXOSC4	0.378696		O43815	STRN	35		O60610	DIAPH1	0.410269
P15104	GLUL	17		P42167	TMPO	0.378696		Q15645	TRIP13	35		P17174	GOT1	0.410137
Q9Y6E2	BZW2	17		O94888	UBXN7	0.378527		Q9BXS4	TMEM59	35		P04439	HLA-A	0.410005
P45984	MAPK9	17		Q9Y657	SPIN1	0.378527		Q8WVM8	SCFD1	35		P13667	PDIA4	0.410005
O95630	STAMBP	17		Q8WVC0	LEO1	0.378134		Q15437	SEC23B	35		P84095	RHOG	0.409939
P40818	USP8	17		P05090	APOD	0.378078		Q9P2N5	RBM27	35		O94973	AP2A2	0.409873
P04899	GNAI2	17		P23142	FBLN1	0.378022		Q8WXA9	SREK1	35		P54819	AK2	0.409873
Q9Y6A5	TACC3	17		Q9HA64	FN3KRP	0.378022		O60749	SNX2	35		Q8WVM8	SCFD1	0.409807
Q9UKK9	NUDT5	17		Q9NV56	MRGBP	0.377966		Q9NY27	PPP4R2	35		Q99575	POP1	0.409675
P16035	TIMP2	17		P55212	CASP6	0.377742		P02794	FTH1	35		Q6IBS0	TWF2	0.409675
Q9UN81	L1RE1	17		Q8IYD1	GSPT2	0.377686		Q99471	PFDN5	35		P67936	TPM4	0.409544
Q96EP5	DAZAP1	17		Q5TAQ9	DCAF8	0.377518		Q13526	PIN1	35		Q99439	CNN2	0.409544
Q6EMK4	VASN	17		Q96HC4	PDLIM5	0.377406		Q9NY97	B3GNT2	35		P28074	PSMB5	0.409412
P40222	TXLNA	17		Q96GD0	PDXP	0.377127		Q9Y678	COPG1	35		Q9UNE7	STUB1	0.409346
O14908	GIPC1	17		P00966	ASS1	0.377015		Q9Y639	NPTN	35		Q8N4C8	MINK1	0.409215
O94985	CLSTN1	16		O15067	PFAS	0.377015		P09497	CLTB	35		P43246	MSH2	0.409149
Q9Y263	PLAA	16		P17480	UBTF	0.376681		P55735	SEC13	35		Q12792	TWF1	0.409084
P47813	EIF1AX	16		O95456	PSMG1	0.376458		Q13033	STRN3	34		Q9UNF1	MAGED2	0.409084
P31146	CORO1A	16		Q9UBT2	UBA2	0.375848		P56192	MARS1	34		P18669	PGAM1	0.409018
Q9NSD9	FARSB	16		P55327	TPD52	0.375682		Q10567	AP1B1	34		Q29RF7	PDS5A	0.408887
Q9Y4X5	ARIH1	16		P49773	HINT1	0.375682		P25789	PSMA4	34		Q9Y2A7	NCKAP1	0.408887
O60869	EDF1	16		Q9NVX2	NLE1	0.374853		Q9ULR3	PPM1H	34		Q9H3K6	BOLA2B	0.408756
Q8NBZ7	UXS1	16		O95197	RTN3	0.374743		Q99615	DNAJC7	34		P35520	CBS	0.40869
P23193	TCEA1	16		Q9Y4X5	ARIH1	0.374578		Q5T6F2	UBAP2	34		O43242	PSMD3	0.408625
P35241	RDX	16		P37235	HPCAL1	0.374248		P61019	RAB2A	34		P27448	MARK3	0.408625
Q9NTK5	OLA1	16		Q8N6N3	C1orf52	0.374193		Q9Y3B9	RRP15	34		Q93008	USP9X	0.408559
Q13425	SNTB2	16		Q9UHR5	SAP30BP	0.373973		P49321	NASP	34		P00367	GLUD1	0.408494
Q29983	MICA	16		Q9Y5U2	TSSC4	0.373918		Q13561	DCTN2	34		P13804	ETFA	0.408428
Q9UL15	BAG5	16		P47813	EIF1AX	0.373918		Q7L014	DDX46	34		Q96MU7	YTHDC1	0.408232
Q7Z5G4	GOLGA7	16		P13798	APEH	0.373863		Q92616	GCN1	33		P59998	ARPC4	0.408232
Q01085	TIAL1	16		Q14320	FAM50A	0.373808		Q5JTV8	TOR1AIP1	33		P04181	OAT	0.408101
Q9NTI5	PDS5B	16		Q6UXN9	WDR82	0.373699		Q9Y3C6	PPIL1	33		Q9NWT1	PAK1IP1	0.408036
P00492	HPRT1	16		P09110	ACAA1	0.373699		P55060	CSE1L	33		Q99496	RNF2	0.407971
O14929	HAT1	16		P17931	LGALS3	0.373043		Q9NR09	BIRC6	33		Q9NU22	MDN1	0.407971
P07339	CTSD	16		O43598	DNPH1	0.372933		P13667	PDIA4	33		O14828	SCAMP3	0.40784
Q9UHR5	SAP30BP	16		P34896	SHMT1	0.37277		Q9H2G2	SLK	33		Q15907	RAB11B	0.40771
Q13085	ACACA	16		O14936	CASK	0.372389		Q8NC42	RNF149	33		P35659	DEK	0.407449
O77932	DXO	16		O60925	PFDN1	0.372334		P08195	SLC3A2	33		P55735	SEC13	0.407254
P49366	DHPS	16		O43681	GET3	0.372171		Q9NZL4	HSPBP1	33		O60841	EIF5B	0.407254
P41223	BUD31	16		Q16890	TPD52L1	0.371954		Q9Y333	LSM2	33		Q03252	LMNB2	0.407188
Q14166	TTLL12	15		Q13464	ROCK1	0.371845		P53041	PPP5C	33		O43815	STRN	0.407058
O95897	OLFM2	15		Q96L92	SNX27	0.371737		Q15303	ERBB4	33		P29317	EPHA2	0.406993
Q9HCU4	CELSR2	15		P30043	BLVRB	0.371358		Q8NBJ4	GOLM1	33		Q99961	SH3GL1	0.406993
P46736	BRCC3	15		Q5TEC6	H3-7	0.37125		Q9P2I0	CPSF2	32		Q9UPN9	TRIM33	0.406928
Q9UJA5	TRMT6	15		Q7RTV0	PHF5A	0.371142		Q8N3E9	PLCD3	32		O95817	BAG3	0.406928
P46063	RECQL	15		O14745	NHERF1	0.370925		Q5VTR2	RNF20	32		Q9P206	NHSL3	0.406799
Q15768	EFNB3	15		Q8WTV0	SCARB1	0.370925		P78406	RAE1	32		Q9UBF2	COPG2	0.406799
P31939	ATIC	15		P21926	CD9	0.370818		Q99598	TSNAX	32		P10155	RO60	0.406734
Q7Z406	MYH14	15		Q13371	PDCL	0.370656		P52565	ARHGDIA	32		Q92878	RAD50	0.406669
Q9ULF5	SLC39A10	15		O00401	WASL	0.370548		Q15599	NHERF2	32		P49720	PSMB3	0.406604
Q13464	ROCK1	15		Q7Z5G4	GOLGA7	0.370548		Q9P013	CWC15	32		P18031	PTPN1	0.406409
P08243	ASNS	15		Q9UK41	VPS28	0.369474		Q9BWJ5	SF3B5	32		P25788	PSMA3	0.406409
O00186	STXBP3	15		Q7Z406	MYH14	0.36926		P45880	VDAC2	32		O43592	XPOT	0.406345
P24593	IGFBP5	15		P23919	DTYMK	0.36926		Q16539	MAPK14	32		Q9UKF6	CPSF3	0.406215
O15427	SLC16A3	14		Q8NFH4	NUP37	0.369206		P00338	LDHA	32		Q9H4M9	EHD1	0.406215
Q9BYC5	FUT8	14		P41223	BUD31	0.369153		Q14671	PUM1	32		O75822	EIF3J	0.40615
Q9H223	EHD4	14		O60828	PQBP1	0.368939		P61011	SRP54	32		Q9NPF4	OSGEP	0.406021
P49247	RPIA	14		Q96NC0	ZMAT2	0.368672		Q9Y2W2	WBP11	32		Q7Z3T8	ZFYVE16	0.405892
P51003	PAPOLA	14		Q5T6V5	QNG1	0.368619		Q14694	USP10	32		P11717	IGF2R	0.405827
P35568	IRS1	14		O95630	STAMBP	0.368512		Q14232	EIF2B1	32		P22102	GART	0.405762
Q7Z3U7	MON2	14		Q13724	MOGS	0.367768		P51531	SMARCA2	32		Q9P287	BCCIP	0.405569
Q15056	EIF4H	14		P05026	ATP1B1	0.367238		Q15436	SEC23A	32		Q8TD19	NEK9	0.405375
Q9UK41	VPS28	14		Q9UJW0	DCTN4	0.367132		Q9UHV9	PFDN2	32		Q9UNM6	PSMD13	0.405311
Q12907	LMAN2	14		O95352	ATG7	0.367027		P53396	ACLY	31		P08758	ANXA5	0.405246
O00154	ACOT7	14		P30419	NMT1	0.366921		P29372	MPG	31		P12277	CKB	0.405246
Q9ULZ3	PYCARD	14		Q9Y237	PIN4	0.366815		Q9P2J5	LARS1	31		O76071	CIAO1	0.405182
Q9Y657	SPIN1	14		Q96M27	PRRC1	0.36671		P28072	PSMB6	31		Q7Z6E9	RBBP6	0.405182
Q3YEC7	RABL6	14		O15427	SLC16A3	0.366657		P61006	RAB8A	31		O60256	PRPSAP2	0.405182
P33908	MAN1A1	14		P46063	RECQL	0.366394		O43447	PPIH	31		P00505	GOT2	0.405182
Q9NV56	MRGBP	14		Q13425	SNTB2	0.366288		P55769	SNU13	31		P98172	EFNB1	0.405118
P06454	PTMA	14		Q8NEZ5	FBXO22	0.366183		Q15907	RAB11B	31		O15145	ARPC3	0.404925
Q3LXA3	TKFC	14		P25325	MPST	0.366078		Q9ULJ7	ANKRD50	31		Q02880	TOP2B	0.404925
P33316	DUT	14		P36969	GPX4	0.36592		P06733	ENO1	31		P49959	MRE11	0.404796
P10586	PTPRF	14		O95394	PGM3	0.36571		Q99733	NAP1L4	31		P60174	TPI1	0.404796
P49588	AARS1	14		Q9NZL9	MAT2B	0.365448		Q8WUM4	PDCD6IP	31		Q9NSE4	IARS2	0.404603
Q14320	FAM50A	13		Q8TBA6	GOLGA5	0.365396		P08758	ANXA5	31		Q9BS26	ERP44	0.404539
P30419	NMT1	13		P51809	VAMP7	0.365186		Q8NFA0	USP32	31		P18615	NELFE	0.404539
P52594	AGFG1	13		P16220	CREB1	0.365134		Q9ULU4	ZMYND8	31		O60664	PLIN3	0.404475
P63241	EIF5A	13		Q92882	OSTF1	0.365082		Q8N4C8	MINK1	31		Q15370	ELOB	0.404411
P60981	DSTN	13		Q8N9N8	EIF1AD	0.365029		Q9H3S7	PTPN23	31		Q15021	NCAPD2	0.404411
Q9NR46	SH3GLB2	13		Q16222	UAP1	0.364925		P48556	PSMD8	31		O43447	PPIH	0.404346
P52209	PGD	13		O95858	TSPAN15	0.364873		P27694	RPA1	31		Q9H074	PAIP1	0.404282
P49641	MAN2A2	13		P17936	IGFBP3	0.364873		Q9UKF6	CPSF3	31		Q9P013	CWC15	0.404218
Q9BZK7	TBL1XR1	13		Q12955	ANK3	0.36482		Q8WVY7	UBLCP1	31		P52789	HK2	0.403962
Q9Y237	PIN4	13		Q9NVD7	PARVA	0.364768		Q16513	PKN2	31		Q15276	RABEP1	0.403898
P26639	TARS1	13		P37837	TALDO1	0.364768		Q08380	LGALS3BP	31		Q99417	MYCBP	0.403898
Q06481	APLP2	13		Q14651	PLS1	0.364664		Q02880	TOP2B	30		Q8TC07	TBC1D15	0.403898
Q9UM47	NOTCH3	13		P22692	IGFBP4	0.364612		O00148	DDX39A	30		Q8NFC6	BOD1L1	0.403834
Q9Y6Y8	SEC23IP	13		P50897	PPT1	0.364455		O15400	STX7	30		Q13011	ECH1	0.40377
Q9BZL1	UBL5	13		P45984	MAPK9	0.364351		P48444	ARCN1	30		O14497	ARID1A	0.403706
Q9UI08	EVL	13		Q9Y376	CAB39	0.364247		Q27J81	INF2	30		Q969S3	ZNF622	0.403642
Q96NC0	ZMAT2	13		Q13951	CBFB	0.364039		Q29RF7	PDS5A	30		P50851	LRBA	0.403642
Q5T0N5	FNBP1L	13		Q92896	GLG1	0.364039		Q15363	TMED2	30		Q13564	NAE1	0.403642
Q9NVD7	PARVA	13		Q9NRX4	PHPT1	0.363987		Q9BS26	ERP44	30		P61011	SRP54	0.403514
Q96AT1	KIAA1143	12		P35241	RDX	0.363831		O60841	EIF5B	30		Q9BTC8	MTA3	0.403514
Q15061	WDR43	12		P35270	SPR	0.363727		Q92797	SYMPK	30		P62191	PSMC1	0.40345
Q9H4A6	GOLPH3	12		Q08209	PPP3CA	0.363572		P53618	COPB1	30		O15084	ANKRD28	0.403387
Q5SRI9	MANEA	12		Q15061	WDR43	0.363054		P54259	ATN1	30		P62495	ETF1	0.403387
Q05048	CSTF1	12		P21741	MDK	0.362899		P49411	TUFM	30		P13796	LCP1	0.403387
P01033	TIMP1	12		Q9ULZ3	PYCARD	0.362899		Q7Z6E9	RBBP6	30		P09543	CNP	0.403195
Q9GZZ1	NAA50	12		Q15768	EFNB3	0.362795		Q7Z478	DHX29	30		Q9Y3B9	RRP15	0.403131
P10768	ESD	12		O94985	CLSTN1	0.362692		Q9H4G0	EPB41L1	30		Q16513	PKN2	0.403131
O60245	PCDH7	12		O77932	DXO	0.36264		Q96ER3	SAAL1	30		Q9GZZ9	UBA5	0.403068
P49591	SARS1	12		Q92542	NCSTN	0.362486		Q8TAA9	VANGL1	30		Q15811	ITSN1	0.40294
Q96HC4	PDLIM5	12		Q9NRN7	AASDHPPT	0.362228		P15924	DSP	30		Q9UNN5	FAF1	0.40294
O60512	B4GALT3	12		P78417	GSTO1	0.362022		Q8TBX8	PIP4K2C	30		Q9HC35	EML4	0.40294
O43488	AKR7A2	12		P15104	GLUL	0.36192		P49959	MRE11	29		Q96D46	NMD3	0.402877
Q15819	UBE2V2	12		Q9C0C4	SEMA4C	0.361663		P00367	GLUD1	29		P51665	PSMD7	0.402813
Q9NUQ9	CYRIB	12		Q9ULF5	SLC39A10	0.361406		Q8TAF3	WDR48	29		Q7KZ85	SUPT6H	0.402813
P30043	BLVRB	12		P54578	USP14	0.360997		Q9UBF2	COPG2	29		Q9UMX0	UBQLN1	0.402686
P18433	PTPRA	12		Q8NFH3	NUP43	0.360997		Q8NI27	THOC2	29		Q96C19	EFHD2	0.402686
O76061	STC2	12		Q96SU4	OSBPL9	0.360946		O94973	AP2A2	29		P55769	SNU13	0.402558
Q9Y5P4	CERT1	11		Q14653	IRF3	0.360588		Q9UNS2	COPS3	29		Q9H4G0	EPB41L1	0.402558
P39687	ANP32A	11		Q5VWZ2	LYPLAL1	0.360232		P26358	DNMT1	29		Q8NI27	THOC2	0.402431
Q29980	MICB	11		P10586	PTPRF	0.36013		Q13404	UBE2V1	29		P31350	RRM2	0.402431
Q8TAT6	NPLOC4	11		P07333	CSF1R	0.359673		P54920	NAPA	29		P53990	IST1	0.402368
Q9P2B2	PTGFRN	11		Q9NR46	SH3GLB2	0.359571		P42166	TMPO	29		O76024	WFS1	0.402304
Q4G0F5	VPS26B	11		O94855	SEC24D	0.359571		O75396	SEC22B	29		P12830	CDH1	0.402241
Q96GX9	APIP	11		P60981	DSTN	0.359318		Q92878	RAD50	29		O60508	CDC40	0.402177
Q5TEC6	H3-7	11		Q53HC9	EIPR1	0.358862		Q9Y5X1	SNX9	29		P68036	UBE2L3	0.402177
O95084	PRSS23	11		P13497	BMP1	0.358459		P67936	TPM4	29		P17858	PFKL	0.402177
Q9H6Z4	RANBP3	11		Q7L5D6	GET4	0.358308		Q9BTC8	MTA3	29		Q9Y2W2	WBP11	0.402114
Q96IJ6	GMPPA	11		Q8NBZ7	UXS1	0.358207		O75832	PSMD10	29		Q03135	CAV1	0.40186
Q9NRF8	CTPS2	11		Q7Z3U7	MON2	0.358157		Q16401	PSMD5	29		O75368	SH3BGRL	0.401734
Q9NX02	NLRP2	11		P51580	TPMT	0.358157		P53985	SLC16A1	29		Q14694	USP10	0.401734
P45974	USP5	11		Q9UMY1	NOL7	0.357855		Q9H3P2	NELFA	29		Q92609	TBC1D5	0.401734
Q96NY8	NECTIN4	11		P09960	LTA4H	0.357554		Q9UQ13	SHOC2	28		Q13409	DYNC1I2	0.401734
P37235	HPCAL1	11		P09467	FBP1	0.357504		O43240	KLK10	28		Q8TBX8	PIP4K2C	0.401607
Q16890	TPD52L1	11		P24593	IGFBP5	0.356953		O00233	PSMD9	28		Q96RS6	NUDCD1	0.401417
Q6VY07	PACS1	11		Q9HCU4	CELSR2	0.356803		Q13868	EXOSC2	28		P51659	HSD17B4	0.401417
Q8IWB7	WDFY1	11		O43776	NARS1	0.356753		Q9H0E2	TOLLIP	28		Q9Y5K5	UCHL5	0.401354
Q9Y376	CAB39	10		Q8NC96	NECAP1	0.356553		Q15276	RABEP1	28		P61457	PCBD1	0.401354
Q92882	OSTF1	10		Q9H4A6	GOLPH3	0.355708		P61457	PCBD1	28		O76003	GLRX3	0.401354
Q13724	MOGS	10		P10253	GAA	0.355658		P60660	MYL6	28		Q5T8P6	RBM26	0.401291
O94923	GLCE	10		Q96AT1	KIAA1143	0.355658		Q8N392	ARHGAP18	28		O14617	AP3D1	0.401291
Q8WTS6	SETD7	10		Q9GZZ1	NAA50	0.355261		O14497	ARID1A	28		P40925	MDH1	0.401291
Q96M27	PRRC1	10		Q13332	PTPRS	0.355212		Q9NV70	EXOC1	28		Q96ST3	SIN3A	0.401165
P49773	HINT1	10		Q3LXA3	TKFC	0.355162		O60763	USO1	28		P06744	GPI	0.401165
P34896	SHMT1	10		Q9NUQ9	CYRIB	0.355162		O95747	OXSR1	28		Q9UI10	EIF2B4	0.401101
Q86SR1	GALNT10	10		O60701	UGDH	0.355063		P16070	CD44	28		Q9Y333	LSM2	0.401038
Q92796	DLG3	10		O76061	STC2	0.354866		Q01130	SRSF2	28		O00148	DDX39A	0.401038
Q92930	RAB8B	10		Q05048	CSTF1	0.354668		Q969S3	ZNF622	28		Q96B26	EXOSC8	0.401038
Q92890	UFD1	10		Q9Y6Y8	SEC23IP	0.354225		P55196	AFDN	28		Q04760	GLO1	0.401038
Q9BTW9	TBCD	10		Q8IWU5	SULF2	0.353586		Q5T4S7	UBR4	28		Q9P2I0	CPSF2	0.400912
Q00688	FKBP3	10		Q6EMK4	VASN	0.352803		Q8TEX9	IPO4	28		Q8NE71	ABCF1	0.400912
P09467	FBP1	10		O95989	NUDT3	0.352364		P30048	PRDX3	28		Q15714	TSC22D1	0.400849
Q86SF2	GALNT7	10		Q9Y240	CLEC11A	0.352266		Q96ST3	SIN3A	27		Q99598	TSNAX	0.400723
P11413	G6PD	10		Q06481	APLP2	0.352072		P09211	GSTP1	27		P50613	CDK7	0.40066
P55327	TPD52	10		P35625	TIMP3	0.352023		Q13144	EIF2B5	27		Q9UNS2	COPS3	0.400597
O75874	IDH1	10		P49247	RPIA	0.351635		Q13137	CALCOCO2	27		P27105	STOM	0.400534
P22692	IGFBP4	10		Q16555	DPYSL2	0.351586		Q9H0X4	FAM234A	27		Q13610	PWP1	0.400534
Q92896	GLG1	10		Q8WTS6	SETD7	0.351489		P54709	ATP1B3	27		Q9P265	DIP2B	0.400534
P48307	TFPI2	9		P31146	CORO1A	0.351247		P99999	CYCS	27		P30622	CLIP1	0.400471
Q86TI2	DPP9	9		Q96IZ0	PAWR	0.351102		P12268	IMPDH2	27		Q9Y4Z0	LSM4	0.400471
Q16394	EXT1	9		Q9Y6A5	TACC3	0.350909		O15127	SCAMP2	27		P06396	GSN	0.400471
Q8N6N3	C1orf52	9		Q93052	LPP	0.350909		P43246	MSH2	27		Q9H8Y8	GORASP2	0.400408
Q9Y6M5	SLC30A1	9		Q96DB5	RMDN1	0.350089		Q12972	PPP1R8	27		P14324	FDPS	0.400346
P07333	CSF1R	9		O94923	GLCE	0.349945		Q4V328	GRIPAP1	27		Q12830	BPTF	0.399969
Q14766	LTBP1	9		Q969U7	PSMG2	0.349849		P13861	PRKAR2A	27		P46939	UTRN	0.399843
Q13426	XRCC4	9		P28676	GCA	0.349801		Q53EL6	PDCD4	27		Q8IZA0	KIAA0319L	0.39978
P21589	NT5E	9		Q9UM47	NOTCH3	0.349753		P43034	PAFAH1B1	27		Q9NTJ3	SMC4	0.399718
Q8WVQ1	CANT1	9		O14908	GIPC1	0.349609		Q9Y3A3	MOB4	27		Q01130	SRSF2	0.399655
P07996	THBS1	9		P36955	SERPINF1	0.349609		P40926	MDH2	27		Q8WXA9	SREK1	0.399467
P28676	GCA	9		Q96GX9	APIP	0.349561		Q9HD42	CHMP1A	27		P09493	TPM1	0.399467
Q08209	PPP3CA	9		P21291	CSRP1	0.349513		Q9UHR4	BAIAP2L1	27		P30040	ERP29	0.399467
O15347	HMGB3	9		Q9Y2V2	CARHSP1	0.34937		Q9UBB4	ATXN10	27		Q9NR50	EIF2B3	0.399092
Q9UBT2	UBA2	9		Q5T2T1	MPP7	0.349226		Q99496	RNF2	27		Q8TAA9	VANGL1	0.398905
P23381	WARS1	9		P01033	TIMP1	0.348987		O15511	ARPC5	27		P61201	COPS2	0.398905
Q96SU4	OSBPL9	9		Q6ZVM7	TOM1L2	0.348987		P35520	CBS	26		Q9Y6E0	STK24	0.398717
Q86X76	NIT1	9		P07996	THBS1	0.348796		Q9UKS6	PACSIN3	26		O43747	AP1G1	0.398717
Q5T2T1	MPP7	9		O43252	PAPSS1	0.348796		P35580	MYH10	26		Q9UL46	PSME2	0.398655
Q9UMY1	NOL7	9		O00592	PODXL	0.3487		Q9HAV4	XPO5	26		P51572	BCAP31	0.398593
P09110	ACAA1	8		Q9Y5P4	CERT1	0.348367		P23284	PPIB	26		Q13144	EIF2B5	0.398593
Q16651	PRSS8	8		O95897	OLFM2	0.347702		Q9NP72	RAB18	26		P54764	EPHA4	0.398468
Q9Y264	ANGPT4	8		Q9NRF8	CTPS2	0.347654		P14635	CCNB1	26		O75146	HIP1R	0.398468
Q96FK6	WDR89	8		Q92930	RAB8B	0.347607		Q9UL46	PSME2	26		P38117	ETFB	0.398343
O00339	MATN2	8		Q9BYE2	TMPRSS13	0.347181		Q00765	REEP5	26		Q9H3N1	TMX1	0.398219
O43252	PAPSS1	8		P49366	DHPS	0.347039		P04181	OAT	26		O43813	LANCL1	0.398219
Q15417	CNN3	8		Q9Y3P9	RABGAP1	0.346803		P53990	IST1	26		P14635	CCNB1	0.398032
P13798	APEH	8		Q712K3	UBE2R2	0.346756		Q8NFC6	BOD1L1	26		Q6IN85	PPP4R3A	0.39797
P39060	COL18A1	8		Q8WZA9	IRGQ	0.346049		P07195	LDHB	26		P50453	SERPINB9	0.397908
P37837	TALDO1	8		Q9BTW9	TBCD	0.345533		O76003	GLRX3	26		Q96F07	CYFIP2	0.397784
Q9Y3P9	RABGAP1	8		P00568	AK1	0.34544		P46939	UTRN	26		Q5H9R7	PPP6R3	0.397722
Q8WTV0	SCARB1	8		Q12907	LMAN2	0.345346		Q9BXS5	AP1M1	26		Q13526	PIN1	0.39766
P00568	AK1	8		Q9Y3E1	HDGFL3	0.345346		O60826	CCDC22	26		Q9NW82	WDR70	0.39766
Q13433	SLC39A6	8		P16035	TIMP2	0.344926		Q9NW82	WDR70	26		Q14257	RCN2	0.397536
O15067	PFAS	8		Q96FK6	WDR89	0.344879		Q01813	PFKP	26		Q06418	TYRO3	0.39735
Q16537	PPP2R5E	8		Q969T9	WBP2	0.344832		Q9H2J4	PDCL3	26		Q8NFA0	USP32	0.397226
P00167	CYB5A	8		Q9H993	ARMT1	0.344413		Q9Y5A9	YTHDF2	26		O75396	SEC22B	0.397226
Q712K3	UBE2R2	8		Q9UI08	EVL	0.343995		Q2M2I8	AAK1	25		Q15293	RCN1	0.396917
O43776	NARS1	8		P00167	CYB5A	0.343902		Q9H3P7	ACBD3	25		P08133	ANXA6	0.396917
Q93052	LPP	8		O43505	B4GAT1	0.343531		P09758	TACSTD2	25		Q9NZL4	HSPBP1	0.396793
Q9H741	SPRING1	7		P41236	PPP1R2	0.343531		Q6IBS0	TWF2	25		P16070	CD44	0.396793
Q96DB5	RMDN1	7		O95084	PRSS23	0.343069		Q8WXH0	SYNE2	25		Q4KMP7	TBC1D10B	0.396732
Q9Y2V2	CARHSP1	7		Q9Y6M5	SLC30A1	0.342838		Q12830	BPTF	25		Q13257	MAD2L1	0.39667
Q12765	SCRN1	7		Q29983	MICA	0.3427		Q15024	EXOSC7	25		P06730	EIF4E	0.39667
P19623	SRM	7		Q86TI2	DPP9	0.342654		Q8TD19	NEK9	25		P29372	MPG	0.396546
P07741	APRT	7		Q92796	DLG3	0.342608		Q9UBC2	EPS15L1	25		O94979	SEC31A	0.396485
P63146	UBE2B	7		Q9BZL1	UBL5	0.342423		Q9BT78	COPS4	25		P49593	PPM1F	0.396485
Q9UNW1	MINPP1	7		Q5SZK8	FREM2	0.342423		Q92466	DDB2	25		P09497	CLTB	0.3963
P09960	LTA4H	7		P49641	MAN2A2	0.342377		Q9Y2A7	NCKAP1	25		Q12849	GRSF1	0.396053
O94898	LRIG2	7		Q13433	SLC39A6	0.34201		P15927	RPA2	25		P11233	RALA	0.395992
Q9UBX7	KLK11	7		P98155	VLDLR	0.341781		Q7Z434	MAVS	25		P60033	CD81	0.395746
Q9NRN7	AASDHPPT	7		Q9BV44	THUMPD3	0.341506		Q92696	RABGGTA	25		Q9BX40	LSM14B	0.395685
Q9P2E7	PCDH10	7		Q86X76	NIT1	0.341095		P07942	LAMB1	25		Q92820	GGH	0.395623
P36955	SERPINF1	7		Q9P0K1	ADAM22	0.340548		Q92876	KLK6	25		O75787	ATP6AP2	0.395623
Q8N335	GPD1L	7		Q9BYC5	FUT8	0.340457		P54725	RAD23A	25		Q6PGP7	SKIC3	0.395623
Q9HA64	FN3KRP	7		Q8N5I2	ARRDC1	0.34032		P01137	TGFB1	25		Q8N3E9	PLCD3	0.395562
O95631	NTN1	7		Q16537	PPP2R5E	0.34032		P52701	MSH6	25		Q27J81	INF2	0.395562
Q9NZL9	MAT2B	7		O75071	EFCAB14	0.338963		Q96B26	EXOSC8	25		Q15738	NSDHL	0.3955
Q15198	PDGFRL	7		P52943	CRIP2	0.338873		Q9UPN3	MACF1	25		P07954	FH	0.395439
P50897	PPT1	7		O43488	AKR7A2	0.338648		P56545	CTBP2	25		Q9NVJ2	ARL8B	0.395378
Q06203	PPAT	7		Q92890	UFD1	0.338423		O75390	CS	25		Q7Z434	MAVS	0.395255
Q16222	UAP1	7		P17693	HLA-G	0.337929		Q9GZT8	NIF3L1	25		Q9BT78	COPS4	0.395133
P52943	CRIP2	7		O60512	B4GALT3	0.337661		Q9H8W4	PLEKHF2	25		P09417	QDPR	0.395133
O94855	SEC24D	6		P15559	NQO1	0.337526		Q92747	ARPC1A	25		Q16539	MAPK14	0.394949
Q9GZN4	PRSS22	6		O43405	COCH	0.337214		Q15370	ELOB	25		Q6WKZ4	RAB11FIP1	0.394949
O00592	PODXL	6		Q99426	TBCB	0.337125		O60256	PRPSAP2	25		Q9NX24	NHP2	0.394949
P36969	GPX4	6		Q8N335	GPD1L	0.336946		Q15293	RCN1	25		Q14118	DAG1	0.394888
P19021	PAM	6		P29762	CRABP1	0.336902		O00291	HIP1	24		Q9C0C9	UBE2O	0.394888
Q8WZA1	POMGNT1	6		O95631	NTN1	0.336857		Q8N6T3	ARFGAP1	24		Q8WU90	ZC3H15	0.394888
Q96EU7	C1GALT1C1	6		Q09328	MGAT5	0.336768		O15162	PLSCR1	24		Q2M2I8	AAK1	0.394827
O94903	PLPBP	6		Q8TAT6	NPLOC4	0.336679		Q9UIA9	XPO7	24		Q15102	PAFAH1B3	0.394582
Q8IWU6	SULF1	6		P05114	HMGN1	0.336679		P17812	CTPS1	24		O14737	PDCD5	0.394521
P05114	HMGN1	6		P53582	METAP1	0.336679		Q5T8P6	RBM26	24		Q96D71	REPS1	0.39446
P15692	VEGFA	6		Q13907	IDI1	0.336368		O75340	PDCD6	24		Q05655	PRKCD	0.39446
Q9H993	ARMT1	6		P20827	EFNA1	0.336324		P62310	LSM3	24		P61019	RAB2A	0.394399
Q16555	DPYSL2	6		Q9BRP4	PAAF1	0.336191		O14828	SCAMP3	24		P13797	PLS3	0.394399
Q9BV44	THUMPD3	6		Q12765	SCRN1	0.335969		Q12768	WASHC5	24		Q5JVF3	PCID2	0.394216
Q99985	SEMA3C	6		Q8IWU6	SULF1	0.335837		P35609	ACTN2	24		Q13137	CALCOCO2	0.393972
P53582	METAP1	6		Q9P2B2	PTGFRN	0.335704		P18615	NELFE	24		O15511	ARPC5	0.39385
Q8NEZ5	FBXO22	6		Q13426	XRCC4	0.33566		P26640	VARS1	24		O00291	HIP1	0.393729
Q6ZVM7	TOM1L2	6		Q16651	PRSS8	0.335174		Q9HAU5	UPF2	24		P20020	ATP2B1	0.393729
Q641Q3	METRNL	6		P15692	VEGFA	0.335174		P30041	PRDX6	24		O60678	PRMT3	0.393607
P53602	MVD	6		Q00796	SORD	0.33513		Q92609	TBC1D5	23		Q96J02	ITCH	0.393546
O94907	DKK1	6		Q8WZA0	LZIC	0.334998		P61769	B2M	23		Q9Y6W5	WASF2	0.393486
O43405	COCH	6		Q9H299	SH3BGRL3	0.334822		Q9UI10	EIF2B4	23		P80723	BASP1	0.393122
Q9UGV2	NDRG3	5		Q9UH65	SWAP70	0.334295		Q9NWV8	BABAM1	23		Q96J01	THOC3	0.392819
O60701	UGDH	5		Q8N543	OGFOD1	0.333639		P41250	GARS1	23		O75531	BANF1	0.392758
Q01415	GALK2	5		Q04726	TLE3	0.333595		Q96QR8	PURB	23		Q9UNP9	PPIE	0.392637
Q09328	MGAT5	5		Q9BY32	ITPA	0.333421		Q15019	SEPTIN2	23		Q1ED39	KNOP1	0.392516
Q9UH65	SWAP70	5		Q13938	CAPS	0.333159		P54727	RAD23B	23		P17813	ENG	0.392335
Q9UK23	NAGPA	5		Q6H9L7	ISM2	0.332551		O94966	USP19	23		P25789	PSMA4	0.392214
Q04726	TLE3	5		Q641Q3	METRNL	0.332334		Q03252	LMNB2	23		Q8IWJ2	GCC2	0.392214
Q969T9	WBP2	5		P29373	CRABP2	0.332204		O43818	RRP9	23		Q01973	ROR1	0.391973
P45877	PPIC	5		P33908	MAN1A1	0.332117		P06744	GPI	23		Q9H3Q1	CDC42EP4	0.391973
P78417	GSTO1	5		Q9P2E7	PCDH10	0.332117		Q96JB5	CDK5RAP3	23		Q9BT73	PSMG3	0.391672
P53384	NUBP1	5		Q9UK23	NAGPA	0.331987		Q96F07	CYFIP2	23		Q96JB5	CDK5RAP3	0.391612
P41236	PPP1R2	5		Q96KP4	CNDP2	0.331728		P61201	COPS2	23		Q53EL6	PDCD4	0.391551
P07902	GALT	5		P21399	ACO1	0.331599		O75531	BANF1	23		Q9NP72	RAB18	0.391491
Q00796	SORD	5		P21589	NT5E	0.331125		P61956	SUMO2	23		O75340	PDCD6	0.391371
Q96B54	ZNF428	5		P01034	CST3	0.330953		P09493	TPM1	23		Q9HAU5	UPF2	0.391371
Q5T6V5	QNG1	5		Q96NY8	NECTIN4	0.330738		Q9C0C2	TNKS1BP1	23		Q9ULR3	PPM1H	0.391251
O00548	DLL1	5		Q15198	PDGFRL	0.330695		Q9NVJ2	ARL8B	23		Q96TA1	NIBAN2	0.391191
Q9UBX1	CTSF	5		Q8IWB7	WDFY1	0.329456		P37802	TAGLN2	23		P29350	PTPN6	0.391131
P29373	CRABP2	5		P53602	MVD	0.329413		Q3MHD2	LSM12	23		P51608	MECP2	0.391131
P49765	VEGFB	5		Q86SF2	GALNT7	0.329073		Q4G148	GXYLT1	23		P60510	PPP4C	0.391071
P54753	EPHB3	5		O94903	PLPBP	0.329073		Q69YN2	CWF19L1	23		P28838	LAP3	0.391011
Q7Z6M1	RABEPK	5		O75493	CA11	0.328734		Q12959	DLG1	23		Q9Y3C6	PPIL1	0.390891
P01034	CST3	5		Q29980	MICB	0.328606		Q2TAY7	SMU1	23		P50552	VASP	0.390891
P20827	EFNA1	5		P29966	MARCKS	0.328437		Q9NU53	GINM1	23		Q9UI12	ATP6V1H	0.390891
Q5SZK8	FREM2	5		P49902	NT5C2	0.328395		P13797	PLS3	22		P02794	FTH1	0.390831
P98155	VLDLR	5		Q9NVS9	PNPO	0.328014		Q99961	SH3GL1	22		O43818	RRP9	0.390651
Q13938	CAPS	5		Q53FT3	HIKESHI	0.327551		O75146	HIP1R	22		Q9BTE3	MCMBP	0.390532
Q96IZ0	PAWR	4		Q9UGV2	NDRG3	0.327509		Q13610	PWP1	22		O00273	DFFA	0.390292
P17936	IGFBP3	4		Q86TU7	SETD3	0.327004		P62495	ETF1	22		Q69YN2	CWF19L1	0.390233
O43598	DNPH1	4		Q9UNW1	MINPP1	0.326879		Q9UNH7	SNX6	22		P35237	SERPINB6	0.390233
Q9UBQ6	EXTL2	4		Q9UBX7	KLK11	0.326795		P31483	TIA1	22		Q12972	PPP1R8	0.390113
P49902	NT5C2	4		P48307	TFPI2	0.326753		O15075	DCLK1	22		Q8N6T3	ARFGAP1	0.390054
Q9Y3E1	HDGFL3	4		Q15814	TBCC	0.326669		P15151	PVR	22		P61086	UBE2K	0.389994
Q96GD0	PDXP	4		Q4G0F5	VPS26B	0.326084		Q7Z6Z7	HUWE1	22		Q9UNH7	SNX6	0.389934
P35270	SPR	4		Q99985	SEMA3C	0.326042		Q9UBQ0	VPS29	22		P35573	AGL	0.389934
P29966	MARCKS	4		P63146	UBE2B	0.326001		Q8TEM1	NUP210	22		O95251	KAT7	0.389875
Q8NCW6	GALNT11	4		Q96B54	ZNF428	0.325834		Q13409	DYNC1I2	22		P48735	IDH2	0.389755
Q96KP4	CNDP2	4		Q96AY3	FKBP10	0.325543		P14314	PRKCSH	22		O60826	CCDC22	0.389696
Q99447	PCYT2	4		Q86SR1	GALNT10	0.325335		Q9UNF0	PACSIN2	22		P31483	TIA1	0.389636
Q9NVS9	PNPO	4		P39060	COL18A1	0.325335		Q12929	EPS8	22		Q92692	NECTIN2	0.389636
Q9NRX4	PHPT1	4		P19021	PAM	0.325169		Q6P1M3	LLGL2	22		Q96DH6	MSI2	0.389577
Q9GZP0	PDGFD	4		O94907	DKK1	0.324465		P02649	APOE	22		Q15303	ERBB4	0.389458
Q99426	TBCB	4		Q16527	CSRP2	0.322781		Q96LA8	PRMT6	22		Q92747	ARPC1A	0.389458
Q9Y6W3	CAPN7	4		Q16719	KYNU	0.322577		Q9UJ70	NAGK	22		Q99707	MTR	0.389458
O60353	FZD6	4		Q01415	GALK2	0.322373		O00743	PPP6C	22		Q96RT1	ERBIN	0.389339
Q9P0K1	ADAM22	4		Q5SRI9	MANEA	0.321478		Q14257	RCN2	22		P53041	PPP5C	0.389279
P23919	DTYMK	4		Q5MNZ9	WIPI1	0.32079		Q9H3Q1	CDC42EP4	21		Q4V328	GRIPAP1	0.389101
Q8WZA0	LZIC	4		Q99784	OLFM1	0.320387		Q9NR50	EIF2B3	21		O60216	RAD21	0.389101
Q9BV20	MRI1	4		Q8NCW6	GALNT11	0.319704		Q9UNN5	FAF1	21		Q02487	DSC2	0.389042
O43760	SYNGR2	4		Q96BJ3	AIDA	0.318984		P16383	GCFC2	21		Q6UX04	CWC27	0.388982
P21399	ACO1	3		Q9Y6W3	CAPN7	0.318068		Q9UHY1	NRBP1	21		Q16401	PSMD5	0.388863
Q5VWZ2	LYPLAL1	3		Q9Y264	ANGPT4	0.317791		Q9H2D6	TRIOBP	21		Q8WVJ2	NUDCD2	0.388745
Q6PK18	OGFOD3	3		Q12882	DPYD	0.317553		P13804	ETFA	21		Q13404	UBE2V1	0.388567
Q5MNZ9	WIPI1	3		Q14766	LTBP1	0.316607		Q15738	NSDHL	21		O15075	DCLK1	0.388567
Q9H2A7	CXCL16	3		Q6ICL3	TANGO2	0.316332		P29144	TPP2	21		Q9BQ52	ELAC2	0.388567
O75071	EFCAB14	3		O43760	SYNGR2	0.315744		Q13308	PTK7	21		P49755	TMED10	0.388449
P29762	CRABP1	3		P45877	PPIC	0.315236		P35659	DEK	21		O75116	ROCK2	0.38833
O95394	PGM3	3		Q9P2T1	GMPR2	0.314808		Q93008	USP9X	21		O43237	DYNC1LI2	0.388212
Q99784	OLFM1	3		Q6PK18	OGFOD3	0.314653		O43747	AP1G1	21		P43490	NAMPT	0.388153
Q9BY32	ITPA	3		Q9HCH5	SYTL2	0.314497		Q9H4M9	EHD1	21		Q96MW1	CCDC43	0.388153
Q8N543	OGFOD1	3		Q6GMV2	SMYD5	0.313878		Q12913	PTPRJ	21		Q8IXH7	NELFCD	0.388035
Q15814	TBCC	3		P07902	GALT	0.313723		P12532	CKMT1B	21		O14672	ADAM10	0.387976
Q53FT3	HIKESHI	3		Q6WRI0	IGSF10	0.313453		Q13867	BLMH	21		P24666	ACP1	0.387917
Q96AY3	FKBP10	3		Q9H7C9	AAMDC	0.312953		O14737	PDCD5	21		Q99719	SEPTIN5	0.387799
Q53H82	LACTB2	3		Q99447	PCYT2	0.312301		O75695	RP2	21		Q8WVY7	UBLCP1	0.387681
P15559	NQO1	3		Q9H2E6	SEMA6A	0.311995		Q96RT1	ERBIN	21		Q13867	BLMH	0.387681
P25325	MPST	3		Q96EK6	GNPNAT1	0.311766		P80723	BASP1	21		P50995	ANXA11	0.387504
Q6GMV2	SMYD5	3		O00625	PIR	0.311614		P08648	ITGA5	21		Q9BRK5	SDF4	0.387445
Q9Y2H5	PLEKHA6	3		Q8WVQ1	CANT1	0.311499		O15498	YKT6	21		Q6P1N0	CC2D1A	0.387327
Q13907	IDI1	3		Q9H741	SPRING1	0.311043		O95274	LYPD3	21		P62070	RRAS2	0.387268
Q8WZA9	IRGQ	3		P53384	NUBP1	0.310892		P49356	FNTB	21		Q9UKY7	CDV3	0.387033
O95340	PAPSS2	3		O94898	LRIG2	0.310513		Q9P287	BCCIP	21		Q9UQ13	SHOC2	0.386974
Q9H2E6	SEMA6A	3		P54753	EPHB3	0.309758		Q9BRR6	ADPGK	20		Q2TAY7	SMU1	0.386974
P21291	CSRP1	3		Q7Z6M1	RABEPK	0.309683		P51659	HSD17B4	20		Q9UHV9	PFDN2	0.386916
Q8N806	UBR7	2		Q9GZN4	PRSS22	0.308708		P07384	CAPN1	20		Q01650	SLC7A5	0.386857
O75493	CA11	2		O00339	MATN2	0.308521		Q9Y570	PPME1	20		P14735	IDE	0.386857
Q9H9K5	ERVMER34-1	2		Q9UBX1	CTSF	0.308484		O43633	CHMP2A	20		P23284	PPIB	0.386798
Q13275	SEMA3F	2		Q9UNI1	CELA1	0.307553		P49354	FNTA	20		Q9BZZ5	API5	0.386798
Q6FIF0	ZFAND6	2		Q9Y2H5	PLEKHA6	0.307405		O95251	KAT7	20		P35611	ADD1	0.386739
Q9H7C9	AAMDC	2		Q13275	SEMA3F	0.306297		Q9HC35	EML4	20		P99999	CYCS	0.386681
P23434	GCSH	2		Q16394	EXT1	0.305856		Q9UNF1	MAGED2	20		Q96DG6	CMBL	0.386681
Q96BJ3	AIDA	2		Q8WZA1	POMGNT1	0.305856		P12277	CKB	20		Q8N1G2	CMTR1	0.386681
Q13753	LAMC2	2		Q9GZP0	PDGFD	0.305745		Q9Y6I3	EPN1	20		P30740	SERPINB1	0.386681
Q16719	KYNU	2		Q6FIF0	ZFAND6	0.305709		Q9UBX5	FBLN5	20		Q16698	DECR1	0.386622
P51580	TPMT	2		P80404	ABAT	0.305233		P28062	PSMB8	20		Q99523	SORT1	0.386505
Q12882	DPYD	2		Q9UBQ6	EXTL2	0.30505		Q8IXH7	NELFCD	20		Q16204	CCDC6	0.386271
P00813	ADA	2		O95340	PAPSS2	0.304431		Q13098	GPS1	20		Q53SF7	COBLL1	0.386271
Q96Q11	TRNT1	2		P49765	VEGFB	0.303272		P30533	LRPAP1	20		P55786	NPEPPS	0.386271
Q86TU7	SETD3	2		Q13753	LAMC2	0.303056		O60610	DIAPH1	20		P21281	ATP6V1B2	0.386154
O00625	PIR	2		Q9H2A7	CXCL16	0.301051		Q9Y2A9	B3GNT3	20		P54709	ATP1B3	0.386095
Q96L58	B3GALT6	2		P10109	FDX1	0.30098		P48735	IDH2	20		Q9Y570	PPME1	0.38592
Q9H299	SH3BGRL3	2		Q8N806	UBR7	0.299424		P54819	AK2	20		P48556	PSMD8	0.385803
Q96EK6	GNPNAT1	2		Q9Y365	STARD10	0.298968		Q16204	CCDC6	20		Q13442	PDAP1	0.385686
Q6H9L7	ISM2	2		Q9BV20	MRI1	0.298688		Q96D71	REPS1	20		Q92797	SYMPK	0.385628
Q9UIC8	LCMT1	2		P23434	GCSH	0.298688		Q92783	STAM	20		P15374	UCHL3	0.385628
Q9Y365	STARD10	2		Q9H9K5	ERVMER34-1	0.295502		O60216	RAD21	20		P22059	OSBP	0.38557
P04085	PDGFA	2		O14562	UBFD1	0.294614		Q96DA0	ZG16B	20		P28072	PSMB6	0.385511
P18065	IGFBP2	1		Q6UXI9	NPNT	0.293968		O43924	PDE6D	20		P00491	PNP	0.385278
Q86WR0	CCDC25	1		O00548	DLL1	0.293867		O94979	SEC31A	20		Q86Y82	STX12	0.38522
O14562	UBFD1	1		O60353	FZD6	0.293697		P41208	CETN2	20		Q96KG9	SCYL1	0.38522
Q9HCH5	SYTL2	1		Q96L58	B3GALT6	0.293393		Q02952	AKAP12	20		P35609	ACTN2	0.38522
Q9UNI1	CELA1	1		Q86SQ4	ADGRG6	0.293326		P04062	GBA1	20		P55011	SLC12A2	0.38522
P41271	NBL1	1		Q96EU7	C1GALT1C1	0.291081		P49257	LMAN1	19		Q9UKS6	PACSIN3	0.385162
P08476	INHBA	1		P00813	ADA	0.289857		P00505	GOT2	19		Q99543	DNAJC2	0.385103
Q9P2T1	GMPR2	1		Q9UIC8	LCMT1	0.287925		Q08345	DDR1	19		Q9UBC2	EPS15L1	0.385045
Q6WRI0	IGSF10	1		Q53H82	LACTB2	0.287795		Q16625	OCLN	19		P30566	ADSL	0.384987
Q6UXI9	NPNT	1		P41271	NBL1	0.287114		Q9UHF1	EGFL7	19		P61956	SUMO2	0.384929
P80404	ABAT	1		P04085	PDGFA	0.283916		Q15021	NCAPD2	19		P05091	ALDH2	0.384871
Q6ICL3	TANGO2	1		P18065	IGFBP2	0.275448		P49593	PPM1F	19		Q9UPU5	USP24	0.384871
O43570	CA12	1		Q96Q11	TRNT1	0.273733		Q96DG6	CMBL	19		P25787	PSMA2	0.384755
Q8TEA8	DTD1	1		Q96P44	COL21A1	0.273674		Q8N3U4	STAG2	19		P01024	C3	0.384755
Q86SQ4	ADGRG6	1		Q8TEA8	DTD1	0.267247		Q9H8J5	MANSC1	19		Q9P2R3	ANKFY1	0.384523
Q6GMV3	PTRHD1	1		Q86WR0	CCDC25	0.266075		Q05655	PRKCD	19		P20810	CAST	0.384291
P18564	ITGB6	1		P18564	ITGB6	0.265632		P23634	ATP2B4	19		Q96QR8	PURB	0.384233
Q16527	CSRP2	1		O43570	CA12	0.265576		Q99417	MYCBP	19		Q9NXG2	THUMPD1	0.384059
P10109	FDX1	1		P08476	INHBA	0.256878		P53611	RABGGTB	19		P11216	PYGB	0.384001
P50238	CRIP1	1		P50238	CRIP1	0.253935		Q15435	PPP1R7	19		Q9UBE0	SAE1	0.383943
Q96P44	COL21A1	1		Q6GMV3	PTRHD1	0.248441		Q12805	EFEMP1	19		P12532	CKMT1B	0.383886
Q14563	SEMA3A	1		Q14563	SEMA3A	0.2459		Q96J01	THOC3	19		P54105	CLNS1A	0.383712
Q9P0S2	COX16	N/A		Q9P0S2	COX16	N/A		Q14789	GOLGB1	19		Q9BTT0	ANP32E	0.383597
Q6XQN6	NAPRT	N/A		Q6XQN6	NAPRT	N/A		Q9BVL2	NUP58	19		Q01433	AMPD2	0.383424
Q9NPC4	A4GALT	N/A		Q9NPC4	A4GALT	N/A		P52789	HK2	19		Q9ULJ7	ANKRD50	0.383308
P56159	GFRA1	N/A		P56159	GFRA1	N/A		P68036	UBE2L3	19		Q7L1Q6	BZW1	0.383308
P52823	STC1	N/A		P52823	STC1	N/A		Q9Y281	CFL2	19		Q9BQ70	TCF25	0.383135
Q9BRK3	MXRA8	N/A		Q9BRK3	MXRA8	N/A		Q96EE3	SEH1L	19		P30533	LRPAP1	0.38302
Q86UN2	RTN4RL1	N/A		Q86UN2	RTN4RL1	N/A		P50552	VASP	19		Q02952	AKAP12	0.38302
Q9BQR3	PRSS27	N/A		Q9BQR3	PRSS27	N/A		P15289	ARSA	19		Q12959	DLG1	0.382963
P51161	FABP6	N/A		P51161	FABP6	N/A		Q9NSE4	IARS2	19		P61764	STXBP1	0.382848
Q8TE59	ADAMTS19	N/A		Q8TE59	ADAMTS19	N/A		P47929	LGALS7B	19		Q96TC7	RMDN3	0.382388
P00746	CFD	N/A		P00746	CFD	N/A		Q9BX40	LSM14B	19		Q14789	GOLGB1	0.382331
Q9P2J2	IGSF9	N/A		Q9P2J2	IGSF9	N/A		Q92692	NECTIN2	19		P54577	YARS1	0.382331
Q99727	TIMP4	N/A		Q99727	TIMP4	N/A		Q24JP5	TMEM132A	19		Q06210	GFPT1	0.382216
Q96GA7	SDSL	N/A		Q96GA7	SDSL	N/A		P29401	TKT	19		Q9NV70	EXOC1	0.382102
Q08629	SPOCK1	N/A		Q08629	SPOCK1	N/A		O75976	CPD	19		Q8TAF3	WDR48	0.382044
Q9Y274	ST3GAL6	N/A		Q9Y274	ST3GAL6	N/A		O15230	LAMA5	18		Q9NX46	ADPRS	0.382044
P55001	MFAP2	N/A		P55001	MFAP2	N/A		O43719	HTATSF1	18		Q8N3U4	STAG2	0.381758
								Q6PGP7	SKIC3	18		O15446	POLR1G	0.381758
								Q9BUR4	WRAP53	18		Q8NBS9	TXNDC5	0.381758
								Q9Y5X3	SNX5	18		P78346	RPP30	0.381758
								P16435	POR	18		P54725	RAD23A	0.38153
								P08779	KRT16	18		P98160	HSPG2	0.381473
								Q9Y6W5	WASF2	18		P56545	CTBP2	0.381358
								Q9BTT0	ANP32E	18		Q6FI81	CIAPIN1	0.381301
								P17858	PFKL	18		Q15599	NHERF2	0.381187
								Q9BT73	PSMG3	18		P28070	PSMB4	0.381073
								P11047	LAMC1	18		P04062	GBA1	0.381073
								Q9BYG5	PARD6B	18		Q9NVA2	SEPTIN11	0.381073
								O75116	ROCK2	18		Q9BXS6	NUSAP1	0.381016
								Q12846	STX4	18		Q9Y6I3	EPN1	0.380959
								Q6UWB1	IL27RA	18		O15498	YKT6	0.380789
								P01024	C3	18		O00193	SMAP	0.380789
								Q9UF33	EPHA6	18		Q15018	ABRAXAS2	0.380675
								Q13112	CHAF1B	18		Q15019	SEPTIN2	0.380618
								P23229	ITGA6	18		Q01469	FABP5	0.380618
								Q01433	AMPD2	18		P61769	B2M	0.380505
								Q8WU90	ZC3H15	18		Q9UJ70	NAGK	0.380391
								P61970	NUTF2	18		Q9NZT1	CALML5	0.380391
								P22102	GART	18		P61006	RAB8A	0.380164
								P21281	ATP6V1B2	18		Q9UIA9	XPO7	0.380164
								Q99719	SEPTIN5	18		A0MZ66	SHTN1	0.380164
								P17655	CAPN2	18		P49184	DNASE1L1	0.379937
								O43592	XPOT	18		Q12929	EPS8	0.379654
								P61764	STXBP1	18		O75131	CPNE3	0.379428
								Q9H3K6	BOLA2B	18		Q13098	GPS1	0.379315
								P55011	SLC12A2	18		O15400	STX7	0.379259
								Q96PZ0	PUS7	17		P11117	ACP2	0.379259
								P48059	LIMS1	17		O00161	SNAP23	0.378921
								O60664	PLIN3	17		Q8N392	ARHGAP18	0.378696
								O43237	DYNC1LI2	17		O15541	RNF113A	0.378639
								Q9UI12	ATP6V1H	17		P23921	RRM1	0.378583
								P62070	RRAS2	17		Q96PZ0	PUS7	0.378527
								P09543	CNP	17		Q9UHY1	NRBP1	0.378471
								P11234	RALB	17		Q5T1M5	FKBP15	0.378414
								P08754	GNAI3	17		O75391	SPAG7	0.378302
								O43291	SPINT2	17		Q9NZ63	C9orf78	0.378246
								P61086	UBE2K	17		Q9H2D6	TRIOBP	0.37819
								Q02487	DSC2	17		Q5VZK9	CARMIL1	0.378078
								Q9BTE3	MCMBP	17		Q14192	FHL2	0.378022
								P30040	ERP29	17		Q16625	OCLN	0.378022
								Q9UBE0	SAE1	17		O43719	HTATSF1	0.378022
								Q8TC07	TBC1D15	17		O15127	SCAMP2	0.377966
								Q8IWJ2	GCC2	17		P08754	GNAI3	0.377966
								Q9BT09	CNPY3	17		Q9UNF0	PACSIN2	0.377854
								Q53H96	PYCR3	17		Q9H2C0	GAN	0.377854
								Q676U5	ATG16L1	17		Q9HB07	MYG1	0.377742
								Q9P2K2	TXNDC16	17		P08779	KRT16	0.377686
								P01011	SERPINA3	17		O43768	ENSA	0.37763
								Q9UPT5	EXOC7	17		Q15477	SKIC2	0.37735
								P33151	CDH5	17		Q9UHF1	EGFL7	0.377238
								O14530	TXNDC9	17		O00764	PDXK	0.377238
								Q15477	SKIC2	17		Q5T0W9	FAM83B	0.377127
								Q7Z3T8	ZFYVE16	17		Q99856	ARID3A	0.377071
								P20020	ATP2B1	16		P06737	PYGL	0.377015
								Q92636	NSMAF	16		O00743	PPP6C	0.376792
								Q9NXU5	ARL15	16		O60568	PLOD3	0.376737
								P49915	GMPS	16		Q15833	STXBP2	0.376681
								P23458	JAK1	16		Q9NQX3	GPHN	0.376625
								Q15102	PAFAH1B3	16		Q9NWV8	BABAM1	0.37657
								P01130	LDLR	16		Q92783	STAM	0.37657
								O15031	PLXNB2	16		Q9NY27	PPP4R2	0.376458
								Q6WKZ4	RAB11FIP1	16		P16435	POR	0.376403
								P06756	ITGAV	16		Q9UHD9	UBQLN2	0.376125
								O15020	SPTBN2	16		Q13868	EXOSC2	0.375903
								Q9P265	DIP2B	16		Q99536	VAT1	0.375903
								P60174	TPI1	16		P49257	LMAN1	0.375848
								P48509	CD151	16		Q15262	PTPRK	0.375737
								P06737	PYGL	16		Q9BXB1	LGR4	0.375737
								O60568	PLOD3	16		O43583	DENR	0.375516
								Q14696	MESD	16		P30085	CMPK1	0.37546
								Q9BZZ5	API5	16		Q92876	KLK6	0.37535
								P38117	ETFB	16		Q13112	CHAF1B	0.375294
								P08133	ANXA6	16		Q53H96	PYCR3	0.375239
								Q96D46	NMD3	16		Q68EM7	ARHGAP17	0.375074
								Q96AC1	FERMT2	16		Q15024	EXOSC7	0.374963
								P50995	ANXA11	16		Q13428	TCOF1	0.374908
								P36952	SERPINB5	16		P04632	CAPNS1	0.374853
								Q92599	SEPTIN8	16		Q9H6S3	EPS8L2	0.374853
								Q9BRK5	SDF4	16		Q9NP97	DYNLRB1	0.374412
								Q14344	GNA13	16		Q9Y281	CFL2	0.374357
								Q9BZE9	ASPSCR1	16		Q04695	KRT17	0.374138
								P14854	COX6B1	16		P04259	KRT6B	0.374083
								Q13228	SELENBP1	16		Q9BZI7	UPF3B	0.373973
								O43813	LANCL1	16		P61026	RAB10	0.373918
								P08253	MMP2	16		P54920	NAPA	0.373808
								Q9NU22	MDN1	16		Q9UBQ0	VPS29	0.373754
								P61026	RAB10	16		O43924	PDE6D	0.373754
								Q9NVA2	SEPTIN11	16		Q96EE3	SEH1L	0.373754
								O75131	CPNE3	16		Q8NFW8	CMAS	0.373699
								Q96MX6	DNAAF10	16		P26006	ITGA3	0.373535
								O94880	PHF14	16		Q9Y617	PSAT1	0.373535
								P02538	KRT6A	16		Q14696	MESD	0.373152
								P55268	LAMB2	16		P15586	GNS	0.373043
								Q07960	ARHGAP1	16		P13646	KRT13	0.372988
								Q9BQ70	TCF25	15		Q13308	PTK7	0.372661
								Q12849	GRSF1	15		P07384	CAPN1	0.372606
								O14617	AP3D1	15		Q8NC42	RNF149	0.372443
								O15446	POLR1G	15		P30520	ADSS2	0.372443
								P26006	ITGA3	15		P54727	RAD23B	0.37228
								O60911	CTSV	15		Q13438	OS9	0.372225
								P21579	SYT1	15		Q01581	HMGCS1	0.372225
								P18669	PGAM1	15		P20340	RAB6A	0.372171
								Q01650	SLC7A5	15		Q96DA0	ZG16B	0.372062
								Q99439	CNN2	15		P08253	MMP2	0.372008
								O43768	ENSA	15		P48059	LIMS1	0.371954
								Q9NTJ3	SMC4	15		Q99757	TXN2	0.371845
								Q15286	RAB35	15		Q16775	HAGH	0.371629
								Q99856	ARID3A	15		O15162	PLSCR1	0.371574
								O15541	RNF113A	15		Q8TBC4	UBA3	0.371574
								Q9NX24	NHP2	15		Q9H0E2	TOLLIP	0.371358
								Q13232	NME3	15		O43847	NRDC	0.371304
								Q13428	TCOF1	15		Q8NBJ4	GOLM1	0.37125
								P32456	GBP2	15		Q96PU5	NEDD4L	0.371087
								P54760	EPHB4	15		Q52LJ0	FAM98B	0.371033
								P61960	UFM1	15		P07942	LAMB1	0.370979
								O15496	PLA2G10	15		O95685	PPP1R3D	0.370872
								O00161	SNAP23	15		P48507	GCLM	0.370872
								P50851	LRBA	15		P61966	AP1S1	0.370818
								P13807	GYS1	15		O43240	KLK10	0.37071
								Q5JVF3	PCID2	15		P11766	ADH5	0.37044
								O14786	NRP1	15		Q9GZT8	NIF3L1	0.370387
								O95376	ARIH2	15		Q9NY97	B3GNT2	0.370279
								P09668	CTSH	15		O94966	USP19	0.37001
								Q16698	DECR1	15		Q07960	ARHGAP1	0.37001
								P31350	RRM2	15		Q5JSH3	WDR44	0.369849
								Q99747	NAPG	15		P08648	ITGA5	0.369795
								P13796	LCP1	15		P11047	LAMC1	0.369581
								Q96TC7	RMDN3	15		Q9UPT5	EXOC7	0.36942
								Q9NZ63	C9orf78	15		Q92979	EMG1	0.369367
								P20810	CAST	15		P02649	APOE	0.369313
								Q9NZT1	CALML5	15		Q99614	TTC1	0.36926
								O95994	AGR2	15		O75832	PSMD10	0.369046
								P26374	CHML	15		O15394	NCAM2	0.368886
								P78536	ADAM17	15		P62310	LSM3	0.368726
								O75581	LRP6	15		P36952	SERPINB5	0.368726
								O00461	GOLIM4	15		Q9BWJ5	SF3B5	0.368566
								Q86YM7	HOMER1	14		Q6UWP8	SBSN	0.368566
								P43490	NAMPT	14		P53611	RABGGTB	0.368459
								Q13361	MFAP5	14		Q99471	PFDN5	0.368087
								Q8IZA0	KIAA0319L	14		Q9UBV7	B4GALT7	0.368087
								P35611	ADD1	14		Q32MZ4	LRRFIP1	0.367768
								Q96DH6	MSI2	14		Q13952	NFYC	0.367503
								O43583	DENR	14		Q99436	PSMB7	0.366868
								O95865	DDAH2	14		Q9UMY4	SNX12	0.36671
								Q13564	NAE1	14		P04080	CSTB	0.366657
								Q658Y4	FAM91A1	14		Q9BVG4	PBDC1	0.366657
								Q5KU26	COLEC12	14		Q96ER3	SAAL1	0.366552
								Q99614	TTC1	14		P23634	ATP2B4	0.366552
								P11233	RALA	14		Q9P2K2	TXNDC16	0.366446
								O75054	IGSF3	14		P14854	COX6B1	0.366341
								O60678	PRMT3	14		P02538	KRT6A	0.366288
								P50453	SERPINB9	14		Q2M389	WASHC4	0.366236
								Q8NFW8	CMAS	14		Q9NY33	DPP3	0.366236
								Q15274	QPRT	14		P01137	TGFB1	0.366025
								Q6P1N0	CC2D1A	14		Q92636	NSMAF	0.366025
								Q13952	NFYC	14		Q9NZM1	MYOF	0.366025
								Q9BZI7	UPF3B	14		O75608	LYPLA1	0.365815
								Q5H9R7	PPP6R3	14		P55268	LAMB2	0.365763
								Q5T1M5	FKBP15	14		Q9HD42	CHMP1A	0.365658
								Q06546	GABPA	14		Q16851	UGP2	0.365658
								Q96C19	EFHD2	14		Q6P4Q7	CNNM4	0.365605
								Q9NRW7	VPS45	14		Q9Y5X3	SNX5	0.3655
								Q8NE71	ABCF1	14		Q12913	PTPRJ	0.365343
								Q13439	GOLGA4	14		Q9NT62	ATG3	0.365291
								P00738	HP	14		Q96FX7	TRMT61A	0.365186
								Q9BV40	VAMP8	14		Q92466	DDB2	0.365134
								Q15382	RHEB	14		O75909	CCNK	0.365134
								P14324	FDPS	14		O75351	VPS4B	0.365082
								Q10471	GALNT2	14		Q96BW5	PTER	0.365029
								P07951	TPM2	14		Q15631	TSN	0.364873
								P01009	SERPINA1	13		A1X283	SH3PXD2B	0.364873
								P20908	COL5A1	13		Q96AC1	FERMT2	0.364768
								P98160	HSPG2	13		O75663	TIPRL	0.364768
								Q6FI81	CIAPIN1	13		Q9BTY2	FUCA2	0.364507
								P17301	ITGA2	13		P23458	JAK1	0.364403
								Q9UBV7	B4GALT7	13		Q96MX6	DNAAF10	0.364247
								P34059	GALNS	13		O95994	AGR2	0.364039
								Q15631	TSN	13		Q658Y4	FAM91A1	0.363987
								Q66K74	MAP1S	13		Q4G148	GXYLT1	0.363675
								P04259	KRT6B	13		Q9BYG5	PARD6B	0.363675
								P23921	RRM1	13		O15020	SPTBN2	0.363675
								Q53SF7	COBLL1	13		O75976	CPD	0.363572
								Q6AI08	HEATR6	13		P51687	SUOX	0.363209
								Q99757	TXN2	13		Q96ME1	FBXL18	0.363157
								Q8WVJ2	NUDCD2	13		Q13362	PPP2R5C	0.362847
								Q9H9E3	COG4	13		P23229	ITGA6	0.362795
								Q9NT62	ATG3	13		P13807	GYS1	0.362795
								Q9H2C0	GAN	13		Q14344	GNA13	0.362744
								P24588	AKAP5	13		P00738	HP	0.362744
								P11117	ACP2	13		Q9Y2B0	CNPY2	0.362589
								P18084	ITGB5	13		Q9H8W4	PLEKHF2	0.362486
								P22059	OSBP	13		Q6P1M3	LLGL2	0.362434
								P52799	EFNB2	13		Q86YM7	HOMER1	0.362434
								O94766	B3GAT3	13		P07686	HEXB	0.362331
								Q8TBC4	UBA3	13		P55957	BID	0.362331
								Q9H5N1	RABEP2	13		P54259	ATN1	0.36228
								Q9Y617	PSAT1	13		P40123	CAP2	0.362074
								P35573	AGL	13		O75882	ATRN	0.362022
								Q9ULA0	DNPEP	13		O94880	PHF14	0.36192
								Q4LE39	ARID4B	13		Q9ULA0	DNPEP	0.361868
								P20340	RAB6A	13		P13987	CD59	0.361868
								P50895	BCAM	13		Q12846	STX4	0.361817
								P05091	ALDH2	13		O00461	GOLIM4	0.361766
								Q9Y3D6	FIS1	13		Q4LE39	ARID4B	0.361766
								Q96TA1	NIBAN2	13		P06756	ITGAV	0.361663
								Q96J02	ITCH	13		P47929	LGALS7B	0.36156
								Q96PU5	NEDD4L	13		Q15286	RAB35	0.361509
								Q4KMP7	TBC1D10B	13		Q15382	RHEB	0.361458
								P54577	YARS1	13		Q66K74	MAP1S	0.361406
								P07954	FH	13		Q96LA8	PRMT6	0.361355
								O75843	AP1G2	13		P15151	PVR	0.361304
								Q9H9T3	ELP3	13		Q9Y5S2	CDC42BPB	0.361253
								O14907	TAX1BP3	13		P36639	NUDT1	0.360946
								Q96FX7	TRMT61A	13		Q9NRW7	VPS45	0.360895
								Q7LBR1	CHMP1B	13		O14786	NRP1	0.360844
								Q5JSH3	WDR44	13		P80303	NUCB2	0.360844
								O60502	OGA	12		Q13033	STRN3	0.360742
								O15460	P4HA2	12		Q9UGI8	TES	0.360537
								Q9GZL7	WDR12	12		Q9H9T3	ELP3	0.360283
								P51805	PLXNA3	12		O75487	GPC4	0.360283
								Q01469	FABP5	12		O75347	TBCA	0.360232
								Q13444	ADAM15	12		Q9UK76	JPT1	0.360079
								Q9BVK6	TMED9	12		P07951	TPM2	0.359977
								Q9UPU5	USP24	12		P62328	TMSB4X	0.359927
								Q9NP97	DYNLRB1	12		Q9BQI0	AIF1L	0.359927
								P04632	CAPNS1	12		Q13685	AAMP	0.359876
								Q6UWP8	SBSN	12		P18858	LIG1	0.359622
								P40925	MDH1	12		Q99828	CIB1	0.359571
								Q9Y6Q5	AP1M2	12		Q9BXS4	TMEM59	0.35952
								Q6UXH1	CRELD2	12		Q15363	TMED2	0.359419
								Q5T0W9	FAM83B	12		P17900	GM2A	0.359419
								P60903	S100A10	12		Q00765	REEP5	0.359368
								P08962	CD63	12		P13473	LAMP2	0.359368
								O60645	EXOC3	12		O95359	TACC2	0.359267
								Q04760	GLO1	12		Q12805	EFEMP1	0.359216
								P80303	NUCB2	12		Q9Y3A3	MOB4	0.359166
								O43657	TSPAN6	12		Q13444	ADAM15	0.359166
								Q13362	PPP2R5C	12		Q676U5	ATG16L1	0.359115
								O00273	DFFA	12		P49354	FNTA	0.358913
								Q8WV99	ZFAND2B	12		Q9NXR7	BABAM2	0.358862
								Q9HAV0	GNB4	12		P61960	UFM1	0.358812
								Q7Z7H5	TMED4	12		P40121	CAPG	0.358812
								Q13685	AAMP	12		Q9UJC5	SH3BGRL2	0.358761
								P13646	KRT13	12		Q9BVL2	NUP58	0.35856
								P09958	FURIN	12		Q9GZL7	WDR12	0.35856
								Q2M389	WASHC4	12		P42357	HAL	0.358509
								P11216	PYGB	12		Q9UBX5	FBLN5	0.358459
								Q96K17	BTF3L4	12		Q8WX93	PALLD	0.358408
								Q96BP3	PPWD1	12		P63096	GNAI1	0.358308
								P12110	COL6A2	12		Q9UK59	DBR1	0.358308
								Q13443	ADAM9	12		Q9H0X4	FAM234A	0.358257
								Q9NRB3	CHST12	12		Q9Y639	NPTN	0.358006
								P07686	HEXB	12		P01011	SERPINA3	0.358006
								P61020	RAB5B	12		P51970	NDUFA8	0.357905
								Q8WX93	PALLD	12		Q96BP3	PPWD1	0.357855
								Q16775	HAGH	11		Q9HAV0	GNB4	0.357504
								O75391	SPAG7	11		Q99808	SLC29A1	0.357153
								O75909	CCNK	11		P16383	GCFC2	0.357103
								Q96TA2	YME1L1	11		P49356	FNTB	0.357103
								Q9BTT6	LRRC1	11		P54760	EPHB4	0.357053
								Q9UMY4	SNX12	11		P10619	CTSA	0.357053
								Q92979	EMG1	11		Q15517	CDSN	0.356953
								Q02818	NUCB1	11		P17655	CAPN2	0.356853
								Q8NBS9	TXNDC5	11		Q92599	SEPTIN8	0.356853
								P14735	IDE	11		P09668	CTSH	0.356653
								P15586	GNS	11		O95865	DDAH2	0.356603
								P05362	ICAM1	11		P07602	PSAP	0.356603
								Q86VP1	TAX1BP1	11		P50895	BCAM	0.356454
								Q04695	KRT17	11		P04066	FUCA1	0.356254
								Q9BXS6	NUSAP1	11		Q9BTT6	LRRC1	0.356205
								Q96B23	ARK2N	11		Q9H2J4	PDCL3	0.355906
								Q92575	UBXN4	11		P48200	IREB2	0.355559
								P28838	LAP3	11		P60983	GMFB	0.355459
								P30566	ADSL	11		P24588	AKAP5	0.355261
								P00491	PNP	11		P09525	ANXA4	0.355261
								P62745	RHOB	11		Q96S97	MYADM	0.355162
								Q9H6S3	EPS8L2	11		P09958	FURIN	0.355063
								O75051	PLXNA2	11		O15496	PLA2G10	0.355014
								Q99707	MTR	11		Q13232	NME3	0.354964
								P51693	APLP1	11		P01130	LDLR	0.354915
								O75351	VPS4B	11		P51805	PLXNA3	0.354866
								P36639	NUDT1	11		O60645	EXOC3	0.354866
								Q9NP79	VTA1	11		Q9NRJ7	PCDHB16	0.354866
								P23470	PTPRG	11		Q96RE7	NACC1	0.354767
								Q92520	FAM3C	11		Q8ND24	RNF214	0.354718
								O00193	SMAP	11		Q13439	GOLGA4	0.354619
								Q9BQ52	ELAC2	11		O94887	FARP2	0.354569
								O95685	PPP1R3D	11		P49903	SEPHS1	0.354225
								P23469	PTPRE	11		O75695	RP2	0.354175
								Q6UX04	CWC27	11		O75054	IGSF3	0.354175
								Q13740	ALCAM	11		P01009	SERPINA1	0.354175
								Q9Y4D1	DAAM1	11		Q96B23	ARK2N	0.354126
								P78346	RPP30	11		O60437	PPL	0.354126
								P24666	ACP1	11		P25208	NFYB	0.354077
								O00423	EML1	11		O14907	TAX1BP3	0.353979
								Q8NG11	TSPAN14	11		P12035	KRT3	0.353979
								Q9P0V9	SEPTIN10	11		P16278	GLB1	0.35388
								Q8N441	FGFRL1	10		O60547	GMDS	0.35388
								Q16851	UGP2	10		A6NDB9	PALM3	0.353782
								Q8NBI6	XXYLT1	10		P01019	AGT	0.353733
								O75818	RPP40	10		Q08345	DDR1	0.353635
								Q96MW1	CCDC43	10		P21579	SYT1	0.353488
								Q01970	PLCB3	10		P41208	CETN2	0.353439
								A0MZ66	SHTN1	10		Q9H832	UBE2Z	0.353439
								O75882	ATRN	10		O15230	LAMA5	0.35339
								Q14139	UBE4A	10		Q9NRB3	CHST12	0.35339
								P13473	LAMP2	10		Q6AI08	HEATR6	0.353341
								Q9P2R3	ANKFY1	10		O95274	LYPD3	0.353194
								Q969H8	MYDGF	10		Q5KU26	COLEC12	0.353194
								Q7L1Q6	BZW1	10		P51693	APLP1	0.353194
								Q52LJ0	FAM98B	10		P09486	SPARC	0.353145
								Q9NV96	TMEM30A	10		Q92575	UBXN4	0.353096
								Q14508	WFDC2	10		P30626	SRI	0.353047
								Q15172	PPP2R5A	10		Q15172	PPP2R5A	0.352998
								P17900	GM2A	10		Q9BVK6	TMED9	0.352949
								Q9BUL8	PDCD10	10		P60903	S100A10	0.352949
								O60513	B4GALT4	10		Q86VP1	TAX1BP1	0.352949
								O15232	MATN3	10		P15941	MUC1	0.3529
								Q66K14	TBC1D9B	10		Q96FQ6	S100A16	0.352852
								P51687	SUOX	10		Q9NXU5	ARL15	0.352803
								O75496	GMNN	10		Q92743	HTRA1	0.352803
								Q68EM7	ARHGAP17	10		Q9Y6Q5	AP1M2	0.352705
								P14780	MMP9	10		P62745	RHOB	0.352656
								P35052	GPC1	10		P48509	CD151	0.352559
								P55957	BID	10		O15231	ZNF185	0.352413
								O60437	PPL	10		P78536	ADAM17	0.352364
								Q495W5	FUT11	10		P20645	M6PR	0.352315
								P63096	GNAI1	10		Q24JP5	TMEM132A	0.352266
								Q13442	PDAP1	10		O75581	LRP6	0.352218
								P18850	ATF6	10		Q6UXH1	CRELD2	0.352072
								P55786	NPEPPS	10		Q9BUL8	PDCD10	0.351975
								P40189	IL6ST	10		Q92696	RABGGTA	0.351926
								Q14802	FXYD3	10		Q96BN8	OTULIN	0.351926
								Q96CS7	PLEKHB2	10		Q9C0B1	FTO	0.351829
								P50148	GNAQ	10		O15031	PLXNB2	0.351732
								O75487	GPC4	10		P48739	PITPNB	0.351683
								Q9NXR7	BABAM2	10		Q969H8	MYDGF	0.351586
								Q32MZ4	LRRFIP1	10		P15289	ARSA	0.351538
								Q8NBK3	SUMF1	10		Q02818	NUCB1	0.351538
								Q8NCL4	GALNT6	10		Q99829	CPNE1	0.351538
								Q9BUH6	PAXX	10		Q9BT09	CNPY3	0.351441
								Q9H9S4	CAB39L	10		Q66K14	TBC1D9B	0.351441
								Q8N1G2	CMTR1	10		P35052	GPC1	0.351392
								Q9Y5S2	CDC42BPB	9		P23470	PTPRG	0.351295
								P61024	CKS1B	9		Q9NWV4	CZIB	0.351005
								Q5MNZ6	WDR45B	9		P61024	CKS1B	0.350957
								Q96HD1	CRELD1	9		O43633	CHMP2A	0.350909
								P49862	KLK7	9		O75818	RPP40	0.35086
								P52803	EFNA5	9		O95861	BPNT1	0.35086
								P42357	HAL	9		Q9NPH2	ISYNA1	0.350715
								Q93063	EXT2	9		Q9Y2A9	B3GNT3	0.350667
								P16278	GLB1	9		P52569	SLC7A2	0.350667
								P09601	HMOX1	9		Q96T51	RUFY1	0.350619
								Q03154	ACY1	9		Q9H9E3	COG4	0.350474
								Q9UGI8	TES	9		Q8IV08	PLD3	0.350474
								P40123	CAP2	9		P32456	GBP2	0.35033
								P49419	ALDH7A1	9		P48637	GSS	0.35033
								Q99808	SLC29A1	9		Q9BYZ2	LDHAL6B	0.350282
								P05161	ISG15	9		Q13228	SELENBP1	0.350234
								P08134	RHOC	9		P62256	UBE2H	0.350185
								Q9H832	UBE2Z	9		P23469	PTPRE	0.350137
								Q9HB07	MYG1	9		Q99650	OSMR	0.350137
								O94887	FARP2	9		P61970	NUTF2	0.350089
								Q4J6C6	PREPL	9		Q10471	GALNT2	0.350089
								O75347	TBCA	9		P62942	FKBP1A	0.349945
								P61966	AP1S1	9		P16144	ITGB4	0.349801
								Q9NZ53	PODXL2	9		P34059	GALNS	0.349753
								Q9Y624	F11R	9		Q9H8M7	MINDY3	0.349753
								P13987	CD59	9		Q15404	RSU1	0.349657
								P09417	QDPR	9		Q8NCW5	NAXE	0.349657
								P13284	IFI30	9		P33151	CDH5	0.349513
								Q9Y5P6	GMPPB	9		Q9BV40	VAMP8	0.349513
								Q99536	VAT1	9		P49589	CARS1	0.349465
								Q07812	BAX	9		P14550	AKR1A1	0.349417
								O43529	CHST10	9		O60502	OGA	0.349322
								Q99650	OSMR	9		Q6NVY1	HIBCH	0.349274
								Q9NXG2	THUMPD1	9		Q6YP21	KYAT3	0.349274
								P15309	ACP3	9		Q9UF33	EPHA6	0.348891
								P25391	LAMA1	9		Q9BZE9	ASPSCR1	0.348891
								O00391	QSOX1	9		Q99747	NAPG	0.348891
								Q96S97	MYADM	9		P29279	CCN2	0.348891
								Q13636	RAB31	9		P11234	RALB	0.3487
								Q6IA69	NADSYN1	8		O95376	ARIH2	0.3487
								A1X283	SH3PXD2B	8		P18084	ITGB5	0.348653
								P51808	DYNLT3	8		Q7LBR1	CHMP1B	0.348462
								P52788	SMS	8		P09758	TACSTD2	0.348414
								P52569	SLC7A2	8		Q13443	ADAM9	0.348319
								Q8TB96	ITFG1	8		P55210	CASP7	0.348272
								Q9NTJ4	MAN2C1	8		O00233	PSMD9	0.348224
								Q01581	HMGCS1	8		O15460	P4HA2	0.348129
								Q6P4Q7	CNNM4	8		Q9BUR4	WRAP53	0.347986
								P04066	FUCA1	8		P19883	FST	0.347749
								Q9NUQ3	TXLNG	8		O60911	CTSV	0.347702
								Q96BN8	OTULIN	8		P06865	HEXA	0.347702
								Q06210	GFPT1	8		O43291	SPINT2	0.347654
								Q8NBJ7	SUMF2	8		Q9H8J5	MANSC1	0.347607
								Q9NQ84	GPRC5C	8		Q15435	PPP1R7	0.347465
								Q9BYZ2	LDHAL6B	8		P40189	IL6ST	0.347465
								Q8NB37	GATD1	8		O00423	EML1	0.347228
								P09525	ANXA4	8		Q08722	CD47	0.347181
								Q9ULC4	MCTS1	8		P23443	RPS6KB1	0.347086
								Q9BRT9	GINS4	8		Q96K17	BTF3L4	0.34685
								Q96RE7	NACC1	8		P61020	RAB5B	0.346756
								P05155	SERPING1	8		Q5TZA2	CROCC	0.346614
								Q9Y219	JAG2	8		Q07812	BAX	0.346567
								P36941	LTBR	8		O95881	TXNDC12	0.346426
								O95881	TXNDC12	8		O15305	PMM2	0.346284
								Q11206	ST3GAL4	8		P17301	ITGA2	0.345862
								P23443	RPS6KB1	8		P35556	FBN2	0.345815
								O43847	NRDC	8		P14780	MMP9	0.345674
								Q92743	HTRA1	8		Q9NU53	GINM1	0.345627
								Q14746	COG2	8		O14773	TPP1	0.345533
								P48200	IREB2	8		Q13361	MFAP5	0.345487
								Q9NQX3	GPHN	8		P16870	CPE	0.345393
								O95359	TACC2	8		P49005	POLD2	0.345253
								Q14703	MBTPS1	8		Q7Z7E8	UBE2Q1	0.345112
								P36896	ACVR1B	8		Q13740	ALCAM	0.345019
								Q96PD2	DCBLD2	8		P36896	ACVR1B	0.345019
								Q8NCH0	CHST14	8		P52799	EFNB2	0.344879
								Q5JS37	NHLRC3	8		P15309	ACP3	0.344739
								Q9UK76	JPT1	8		Q14508	WFDC2	0.344646
								P62942	FKBP1A	8		P49189	ALDH9A1	0.344646
								O75110	ATP9A	8		O00515	LAD1	0.344599
								O60927	PPP1R11	8		Q7Z7H5	TMED4	0.344553
								Q5VZK9	CARMIL1	8		Q9H910	JPT2	0.344413
								P62328	TMSB4X	8		P05155	SERPING1	0.34432
								P05121	SERPINE1	8		O43516	WIPF1	0.34432
								P50452	SERPINB8	8		Q9Y4D1	DAAM1	0.344273
								P35237	SERPINB6	8		O14530	TXNDC9	0.344227
								Q9H8M7	MINDY3	7		O60513	B4GALT4	0.344227
								P10619	CTSA	7		Q8NBJ7	SUMF2	0.344227
								Q9Y315	DERA	7		O60888	CUTA	0.344087
								Q99674	CGREF1	7		P49419	ALDH7A1	0.343948
								Q5TZA2	CROCC	7		P36871	PGM1	0.343948
								Q15404	RSU1	7		Q03154	ACY1	0.343809
								Q9NS86	LANCL2	7		Q9NV96	TMEM30A	0.343763
								Q9NRJ7	PCDHB16	7		Q9P0V9	SEPTIN10	0.343716
								P12035	KRT3	7		Q96JC1	VPS39	0.34367
								Q9UN70	PCDHGC3	7		Q5VW32	BROX	0.343438
								Q9H1B5	XYLT2	7		Q8WW59	SPRYD4	0.343392
								Q5ZPR3	CD276	7		Q8IYB7	DIS3L2	0.343392
								Q9BXI6	TBC1D10A	7		O60927	PPP1R11	0.343346
								P30085	CMPK1	7		P16422	EPCAM	0.343346
								Q6IA86	ELP2	7		Q9H2H8	PPIL3	0.343346
								O95861	BPNT1	7		P36941	LTBR	0.343161
								P20645	M6PR	7		Q8IVM0	CCDC50	0.342792
								P21283	ATP6V1C1	7		P26885	FKBP2	0.342792
								Q9BZR6	RTN4R	7		O75843	AP1G2	0.342746
								O15394	NCAM2	7		P05362	ICAM1	0.342746
								P19883	FST	7		O15232	MATN3	0.342746
								P49005	POLD2	7		Q08554	DSC1	0.342608
								Q8IV08	PLD3	7		P20908	COL5A1	0.342561
								Q9Y2B0	CNPY2	7		O75496	GMNN	0.342561
								P29992	GNA11	7		Q92854	SEMA4D	0.34224
								P42892	ECE1	7		Q9Y624	F11R	0.34201
								O00515	LAD1	7		Q9NUY8	TBC1D23	0.34201
								P07602	PSAP	7		Q01970	PLCB3	0.341964
								Q9BQI0	AIF1L	7		Q8NBI6	XXYLT1	0.341918
								Q13214	SEMA3B	7		P25391	LAMA1	0.341826
								Q03167	TGFBR3	7		P01215	CGA	0.341735
								Q9UKY7	CDV3	7		Q13214	SEMA3B	0.341552
								P00750	PLAT	7		Q6IA86	ELP2	0.341506
								Q08431	MFGE8	7		Q9Y696	CLIC4	0.34146
								P16144	ITGB4	7		Q92520	FAM3C	0.341369
								P48163	ME1	7		Q96C86	DCPS	0.341323
								O43286	B4GALT5	7		P52888	THOP1	0.341186
								Q15113	PCOLCE	7		A0AVT1	UBA6	0.341049
								Q8NES3	LFNG	7		Q9NQW7	XPNPEP1	0.341049
								P01019	AGT	7		Q9BXI6	TBC1D10A	0.341003
								Q99828	CIB1	7		P09601	HMOX1	0.340958
								Q9P273	TENM3	7		P50452	SERPINB8	0.340867
								P78504	JAG1	7		P55145	MANF	0.340775
								Q6P587	FAHD1	7		Q9BUH6	PAXX	0.340684
								P55145	MANF	7		Q9ULC4	MCTS1	0.340684
								Q7Z7M0	MEGF8	7		Q9Y6N7	ROBO1	0.340684
								Q92729	PTPRU	7		Q96PD2	DCBLD2	0.340593
								Q15223	NECTIN1	7		Q96CS7	PLEKHB2	0.340548
								P04080	CSTB	7		Q8NCL4	GALNT6	0.340548
								Q9BVG4	PBDC1	7		Q92954	PRG4	0.340411
								Q9NUW8	TDP1	7		P22223	CDH3	0.340366
								Q9BXB1	LGR4	7		P07738	BPGM	0.339912
								Q9BS40	LXN	7		Q8NCF5	NFATC2IP	0.339867
								P11766	ADH5	7		O00391	QSOX1	0.339821
								P06865	HEXA	7		P26374	CHML	0.339776
								Q8NHP8	PLBD2	7		Q9NTJ4	MAN2C1	0.339776
								Q68CQ7	GLT8D1	7		Q9UJJ9	GNPTG	0.339776
								O75663	TIPRL	7		Q7Z7M0	MEGF8	0.339731
								Q92626	PXDN	7		O75051	PLXNA2	0.339595
								P55210	CASP7	7		Q9NS15	LTBP3	0.339505
								P30520	ADSS2	7		P50148	GNAQ	0.339459
								Q99805	TM9SF2	7		Q9BS40	LXN	0.339369
								O00468	AGRN	7		Q8N441	FGFRL1	0.339188
								Q9BQT9	CLSTN3	7		Q9NP79	VTA1	0.339143
								Q04446	GBE1	7		Q6ZMP0	THSD4	0.339098
								Q96T51	RUFY1	7		Q13510	ASAH1	0.339053
								Q9BTY2	FUCA2	7		Q92485	SMPDL3B	0.339053
								Q9H013	ADAM19	7		P05062	ALDOB	0.339008
								O00764	PDXK	7		O14578	CIT	0.338963
								Q9NQ88	TIGAR	6		Q9NUW8	TDP1	0.338693
								Q9NXH9	TRMT1	6		Q6IA69	NADSYN1	0.338603
								Q9UK59	DBR1	6		Q9Y3D6	FIS1	0.338468
								P16860	NPPB	6		Q14703	MBTPS1	0.338423
								O75197	LRP5	6		Q8TB96	ITFG1	0.338064
								P30740	SERPINB1	6		P53367	ARFIP1	0.338064
								P98095	FBLN2	6		P12110	COL6A2	0.337705
								Q15642	TRIP10	6		Q9NPF0	CD320	0.337705
								P30626	SRI	6		P46926	GNPDA1	0.337571
								Q08722	CD47	6		Q8IZ73	RPUSD2	0.337437
								Q8IZ83	ALDH16A1	6		O60218	AKR1B10	0.337392
								Q9NY33	DPP3	6		Q8N8Z6	DCBLD1	0.337259
								Q14393	GAS6	6		Q8NB37	GATD1	0.337214
								P48507	GCLM	6		P08962	CD63	0.337036
								Q8NC67	NETO2	6		P18850	ATF6	0.337036
								P49447	CYB561	6		Q9UN36	NDRG2	0.336857
								O60259	KLK8	6		Q9BRR6	ADPGK	0.336813
								P78325	ADAM8	6		P42892	ECE1	0.336768
								Q8IVM0	CCDC50	6		Q8NHP8	PLBD2	0.336724
								Q5VW32	BROX	6		Q14353	GAMT	0.336591
								Q15059	BRD3	6		Q15059	BRD3	0.336546
								Q8ND24	RNF214	6		Q9BWS9	CHID1	0.336413
								P14550	AKR1A1	6		P41222	PTGDS	0.336147
								Q92824	PCSK5	6		P52788	SMS	0.336102
								O95297	MPZL1	6		Q14139	UBE4A	0.336058
								O15231	ZNF185	6		O95336	PGLS	0.336058
								P26572	MGAT1	6		P28062	PSMB8	0.336014
								Q9NRY6	PLSCR3	6		Q92729	PTPRU	0.336014
								P51970	NDUFA8	6		P05161	ISG15	0.335925
								Q08174	PCDH1	6		Q96TA2	YME1L1	0.335837
								Q8WW59	SPRYD4	6		O75363	BCAS1	0.335837
								Q10469	MGAT2	6		P48163	ME1	0.335792
								O95471	CLDN7	6		Q9BWD1	ACAT2	0.335571
								P16870	CPE	6		Q8TBB5	KLHDC4	0.335483
								Q9GZN8	ADISSP	6		Q6UWB1	IL27RA	0.335395
								Q9BRX5	GINS3	6		O75110	ATP9A	0.335351
								P01215	CGA	6		Q96S86	HAPLN3	0.335351
								P29279	CCN2	6		Q15223	NECTIN1	0.335262
								Q15833	STXBP2	6		P61916	NPC2	0.335174
								P26885	FKBP2	6		Q9NQR4	NIT2	0.33513
								P22307	SCP2	6		Q8NES3	LFNG	0.334954
								Q13510	ASAH1	6		Q99805	TM9SF2	0.334954
								P16422	EPCAM	6		P22307	SCP2	0.33491
								P05062	ALDOB	6		Q9GZP4	PITHD1	0.33491
								Q9NS15	LTBP3	6		Q06546	GABPA	0.334866
								P48739	PITPNB	6		O75223	GGCT	0.334822
								Q9ULC3	RAB23	6		Q9UHL4	DPP7	0.334822
								P62256	UBE2H	6		Q5ZPR3	CD276	0.334778
								Q96BW5	PTER	6		P40394	ADH7	0.334558
								P41222	PTGDS	6		Q00169	PITPNA	0.334514
								P22413	ENPP1	6		Q93063	EXT2	0.334471
								Q9H4D0	CLSTN2	6		Q9NRY6	PLSCR3	0.334427
								Q15517	CDSN	6		Q15274	QPRT	0.334339
								P46976	GYG1	6		Q9Y5Z4	HEBP2	0.334251
								Q96FQ6	S100A16	6		Q9NXH9	TRMT1	0.334207
								Q8N2S1	LTBP4	6		Q9UN70	PCDHGC3	0.334164
								P61916	NPC2	6		Q8N9N7	LRRC57	0.33412
								Q96JC1	VPS39	6		Q9H5N1	RABEP2	0.334032
								P22223	CDH3	6		O75326	SEMA7A	0.333988
								O43516	WIPF1	6		Q96HD1	CRELD1	0.333901
								O60218	AKR1B10	6		Q02742	GCNT1	0.333857
								O75096	LRP4	6		Q9Y315	DERA	0.333814
								Q96ME1	FBXL18	6		Q9BRT9	GINS4	0.333595
								Q8WWI5	SLC44A1	6		Q9H2U2	PPA2	0.333508
								O95671	ASMTL	5		P29083	GTF2E1	0.333464
								Q9UJJ9	GNPTG	5		Q13636	RAB31	0.333421
								A0AVT1	UBA6	5		Q9UKM7	MAN1B1	0.333421
								Q8N9N7	LRRC57	5		P32004	L1CAM	0.333421
								Q9UL26	RAB22A	5		P21283	ATP6V1C1	0.333377
								Q8IV36	HID1	5		O95297	MPZL1	0.333333
								P09486	SPARC	5		P52655	GTF2A1	0.333203
								Q6UXD5	SEZ6L2	5		P13284	IFI30	0.333028
								Q9NTM9	CUTC	5		P52758	RIDA	0.333028
								Q5VSG8	MANEAL	5		P62253	UBE2G1	0.332985
								P15374	UCHL3	5		Q9H013	ADAM19	0.332941
								Q9NPH2	ISYNA1	5		Q9BRX5	GINS3	0.332941
								P15907	ST6GAL1	5		Q9Y547	IFT25	0.332941
								Q9GZP4	PITHD1	5		P46976	GYG1	0.332898
								Q9NQW7	XPNPEP1	5		Q4J6C6	PREPL	0.332768
								Q8NEX9	SDR9C7	5		Q8NC67	NETO2	0.332594
								P52758	RIDA	5		Q9Y316	MEMO1	0.332594
								Q7Z7E8	UBE2Q1	5		Q9NS86	LANCL2	0.332247
								Q8IYB7	DIS3L2	5		P51808	DYNLT3	0.332074
								P15529	CD46	5		P15529	CD46	0.332031
								Q9Y289	SLC5A6	5		Q9P273	TENM3	0.331944
								P48637	GSS	5		Q8WV99	ZFAND2B	0.331858
								P46926	GNPDA1	5		Q9GZN8	ADISSP	0.331858
								O75063	FAM20B	5		O60259	KLK8	0.331771
								Q9UHY7	ENOPH1	5		P29992	GNA11	0.331426
								Q9H910	JPT2	5		P22413	ENPP1	0.33134
								O75223	GGCT	5		O94766	B3GAT3	0.33091
								Q9UKM7	MAN1B1	5		Q8NG11	TSPAN14	0.330781
								O94910	ADGRL1	5		P54687	BCAT1	0.33061
								Q8N8R5	C2orf69	5		Q6P587	FAHD1	0.330524
								P52655	GTF2A1	5		Q9H1Z4	WDR13	0.330181
								Q9UFN0	NIPSNAP3A	5		O43657	TSPAN6	0.33001
								Q9UN36	NDRG2	5		Q92859	NEO1	0.329797
								O14578	CIT	5		Q99574	SERPINI1	0.329754
								Q9NX46	ADPRS	5		Q9Y5P6	GMPPB	0.329669
								Q00169	PITPNA	5		Q9BZR6	RTN4R	0.329669
								Q8TCD5	NT5C	5		P78504	JAG1	0.329541
								Q9UHL4	DPP7	5		P51397	DAP	0.329243
								P35556	FBN2	5		Q7Z4H8	POGLUT3	0.329201
								Q9NS00	C1GALT1	5		P08134	RHOC	0.329116
								P20933	AGA	5		Q96C23	GALM	0.328903
								Q9H5V8	CDCP1	5		Q9BV57	ADI1	0.328776
								Q9Y6N7	ROBO1	5		Q9NUQ3	TXLNG	0.328734
								Q6ZMP0	THSD4	5		Q9H4A4	RNPEP	0.328734
								Q6UY14	ADAMTSL4	5		P05121	SERPINE1	0.328649
								P49589	CARS1	5		Q9H5V8	CDCP1	0.328606
								P15291	B4GALT1	5		Q92626	PXDN	0.328564
								P34949	MPI	5		Q8IYB5	SMAP1	0.328522
								Q8N8Z6	DCBLD1	5		Q9ULC3	RAB23	0.328437
								Q96FV2	SCRN2	5		Q7Z5N4	SDK1	0.328437
								Q8TF05	PPP4R1	5		Q96G03	PGM2	0.328395
								Q8NCF5	NFATC2IP	5		O43278	SPINT1	0.328352
								Q9H2H8	PPIL3	5		O00468	AGRN	0.32831
								Q9NYQ6	CELSR1	5		P10915	HAPLN1	0.328226
								P54687	BCAT1	5		Q9H9S4	CAB39L	0.328141
								Q92854	SEMA4D	5		Q9UHY7	ENOPH1	0.328099
								A6NDB9	PALM3	5		O14618	CCS	0.327972
								Q96S86	HAPLN3	5		Q9H1B5	XYLT2	0.327803
								Q10472	GALNT1	5		Q9H008	LHPP	0.32734
								P07738	BPGM	5		P15907	ST6GAL1	0.327298
								Q92859	NEO1	5		Q9NTM9	CUTC	0.327256
								Q9C0B1	FTO	5		Q8IV36	HID1	0.32713
								Q9BZM4	ULBP3	5		Q9NQ88	TIGAR	0.326921
								P40121	CAPG	5		O75096	LRP4	0.326879
								P15941	MUC1	4		P49862	KLK7	0.326711
								P38571	LIPA	4		Q9Y219	JAG2	0.326669
								Q8IWA5	SLC44A2	4		Q9BX67	JAM3	0.326669
								P55058	PLTP	4		Q495W5	FUT11	0.326586
								Q99584	S100A13	4		Q15113	PCOLCE	0.326586
								O00204	SULT2B1	4		Q10472	GALNT1	0.32646
								Q9BYT8	NLN	4		P16860	NPPB	0.326251
								Q7Z5N4	SDK1	4		Q6UY14	ADAMTSL4	0.326168
								Q9Y547	IFT25	4		P04424	ASL	0.326126
								P36871	PGM1	4		P20933	AGA	0.325876
								P54802	NAGLU	4		O00204	SULT2B1	0.325792
								O14773	TPP1	4		Q8N8R5	C2orf69	0.325709
								P32455	GBP1	4		O95848	NUDT14	0.325377
								O75608	LYPLA1	4		P52803	EFNA5	0.325335
								Q14353	GAMT	4		Q99584	S100A13	0.325335
								Q96EI5	TCEAL4	4		P34949	MPI	0.324962
								Q9BV57	ADI1	4		Q92824	PCSK5	0.32492
								Q9NPF0	CD320	4		Q8N2S1	LTBP4	0.32492
								Q9NZM1	MYOF	4		Q8NCH0	CHST14	0.324796
								Q8IZ52	CHPF	4		Q8IZ52	CHPF	0.324796
								Q96C86	DCPS	4		Q14802	FXYD3	0.324631
								Q5TDH0	DDI2	4		Q08174	PCDH1	0.3243
								P63098	PPP3R1	4		Q8TCT8	SPPL2A	0.323971
								P29400	COL4A5	4		Q96AP7	ESAM	0.323971
								Q02742	GCNT1	4		Q9UFN0	NIPSNAP3A	0.323929
								Q9NUY8	TBC1D23	4		P54802	NAGLU	0.323929
								Q8NFZ8	CADM4	4		P29400	COL4A5	0.323765
								Q9NQR4	NIT2	4		Q9NQ84	GPRC5C	0.323724
								P51397	DAP	4		Q16836	HADH	0.323395
								O15382	BCAT2	4		P49447	CYB561	0.323354
								Q0VDG4	SCRN3	4		Q9NS00	C1GALT1	0.323354
								Q8N108	MIER1	4		Q5MNZ6	WDR45B	0.322944
								O14618	CCS	4		Q9Y6X4	FAM169A	0.322658
								Q9BWS9	CHID1	4		Q14746	COG2	0.322454
								Q8WX77	IGFBPL1	4		Q96EI5	TCEAL4	0.32221
								Q6NVY1	HIBCH	4		Q66K79	CPZ	0.322006
								Q9H1Z4	WDR13	4		O75197	LRP5	0.321925
								Q9Y696	CLIC4	4		Q6UXD5	SEZ6L2	0.321925
								Q9Y3C8	UFC1	4		Q15642	TRIP10	0.321884
								O95833	CLIC3	4		Q9Y289	SLC5A6	0.32164
								Q9Y2B1	RXYLT1	4		Q04446	GBE1	0.321478
								P49903	SEPHS1	4		Q8TF05	PPP4R1	0.321357
								O43278	SPINT1	4		O15382	BCAT2	0.321154
								Q9NWV4	CZIB	4		Q6PL24	TMED8	0.321154
								O75503	CLN5	4		P78325	ADAM8	0.321073
								Q9UMR5	PPT2	4		Q8NBK3	SUMF1	0.321033
								Q6YP21	KYAT3	4		P00750	PLAT	0.320831
								Q9Y5Z4	HEBP2	4		Q9NZ53	PODXL2	0.320629
								P51511	MMP15	3		P38571	LIPA	0.320589
								P04424	ASL	3		O95834	EML2	0.320266
								P07205	PGK2	3		Q8WWI5	SLC44A1	0.320186
								Q92485	SMPDL3B	3		P12111	COL6A3	0.319664
								Q8TBB5	KLHDC4	3		Q0VDG4	SCRN3	0.319624
								O95336	PGLS	3		Q8N108	MIER1	0.319624
								Q9Y316	MEMO1	3		Q96MU8	KREMEN1	0.319224
								Q9H4A4	RNPEP	3		O15484	CAPN5	0.319184
								Q08554	DSC1	3		Q9H4D0	CLSTN2	0.319144
								Q96MU8	KREMEN1	3		Q08431	MFGE8	0.319024
								Q99829	CPNE1	3		Q9BQT9	CLSTN3	0.318984
								Q6NUK1	SLC25A24	3		Q9UMX5	NENF	0.318984
								Q14CX7	NAA25	3		O95833	CLIC3	0.318824
								Q9Y6X4	FAM169A	3		Q86SX6	GLRX5	0.318466
								O95834	EML2	3		Q14CX7	NAA25	0.318346
								P25208	NFYB	3		Q9HAT2	SIAE	0.318346
								P14543	NID1	3		O43286	B4GALT5	0.318187
								P18858	LIG1	3		Q68CQ7	GLT8D1	0.317949
								P07108	DBI	3		Q9UBQ7	GRHPR	0.317632
								Q16836	HADH	3		Q6DD87	ZNF787	0.317395
								O60547	GMDS	3		P55058	PLTP	0.317
								O95848	NUDT14	3		Q9UL26	RAB22A	0.316961
								Q16706	MAN2A1	3		Q99674	CGREF1	0.316922
								Q6PL24	TMED8	3		O95671	ASMTL	0.316882
								Q8IYB5	SMAP1	3		Q8IZ83	ALDH16A1	0.316528
								Q9BX67	JAM3	3		P20962	PTMS	0.315861
								P53367	ARFIP1	3		Q14914	PTGR1	0.315705
								Q9H008	LHPP	3		Q5JS37	NHLRC3	0.315627
								Q9UJC5	SH3BGRL2	3		P42785	PRCP	0.31547
								Q8N4A0	GALNT4	3		Q5TDH0	DDI2	0.314925
								O75363	BCAS1	3		O43529	CHST10	0.314847
								Q7Z4H8	POGLUT3	3		Q9NYQ6	CELSR1	0.314808
								Q9UJ68	MSRA	3		O00115	DNASE2	0.314653
								Q9BWD1	ACAT2	3		Q14393	GAS6	0.314614
								Q6DD87	ZNF787	3		O95471	CLDN7	0.31442
								O75144	ICOSLG	3		P19256	CD58	0.314148
								P32004	L1CAM	3		Q9BTV6	DPH7	0.314148
								O75354	ENTPD6	3		P42126	ECI1	0.313453
								P12111	COL6A3	3		Q6NUK1	SLC25A24	0.313222
								Q99574	SERPINI1	3		Q8NEX9	SDR9C7	0.312799
								Q9BW91	NUDT9	3		P43251	BTD	0.312799
								P60983	GMFB	3		Q8WX77	IGFBPL1	0.312186
								Q8TCT8	SPPL2A	3		O75503	CLN5	0.310967
								Q9H2U2	PPA2	3		Q9BYT8	NLN	0.31074
								Q8NCW5	NAXE	3		Q96IU4	ABHD14B	0.310551
								P43251	BTD	3		Q14019	COTL1	0.309683
								Q14019	COTL1	3		Q8TCD5	NT5C	0.309307
								Q8IUZ5	PHYKPL	2		Q9Y3C8	UFC1	0.308484
								P06132	UROD	2		Q9Y2B1	RXYLT1	0.308297
								O15305	PMM2	2		Q10469	MGAT2	0.30826
								Q86SX6	GLRX5	2		P07205	PGK2	0.308185
								P40394	ADH7	2		O75884	RBBP9	0.307999
								O00115	DNASE2	2		O94910	ADGRL1	0.307925
								Q9NZ08	ERAP1	2		Q9NZ08	ERAP1	0.307887
								Q9NPR2	SEMA4B	2		P32455	GBP1	0.307627
								P20962	PTMS	2		O75063	FAM20B	0.307257
								Q99542	MMP19	2		Q03167	TGFBR3	0.307219
								Q9UBQ7	GRHPR	2		Q8IWK6	ADGRA3	0.307108
								A2RUC4	TYW5	2		P98095	FBLN2	0.307071
								Q96B86	RGMA	2		Q96FV2	SCRN2	0.30637
								Q9BXI9	C1QTNF6	2		Q9Y4D7	PLXND1	0.306223
								P49189	ALDH9A1	2		O75144	ICOSLG	0.305782
								P08174	CD55	2		P63098	PPP3R1	0.305526
								Q8N474	SFRP1	2		Q53FA7	TP53I3	0.305343
								Q9HAT2	SIAE	2		Q8IUZ5	PHYKPL	0.30516
								P27707	DCK	2		Q96B86	RGMA	0.304795
								P19256	CD58	2		P08174	CD55	0.304576
								P52888	THOP1	2		Q8IWA5	SLC44A2	0.304431
								Q96C23	GALM	2		P27707	DCK	0.304068
								Q9BRF8	CPPED1	2		Q9NPR2	SEMA4B	0.303923
								Q14914	PTGR1	2		P24043	LAMA2	0.303923
								Q96IU4	ABHD14B	2		P51511	MMP15	0.303308
								Q9GZX9	TWSG1	2		P07108	DBI	0.302804
								O15484	CAPN5	2		Q9BW91	NUDT9	0.302337
								Q8IZ73	RPUSD2	2		Q9GZX9	TWSG1	0.301907
								Q9UKU6	TRHDE	2		Q9BXI9	C1QTNF6	0.301158
								Q86UN3	RTN4RL2	2		Q8NFZ8	CADM4	0.301087
								Q13641	TPBG	2		P00390	GSR	0.30059
								Q96G03	PGM2	2		Q5VSG8	MANEAL	0.300165
								Q9UMX5	NENF	2		Q9BRF8	CPPED1	0.299741
								Q49AR2	C5orf22	2		Q9Y3B8	REXO2	0.298828
								P29083	GTF2E1	2		O75354	ENTPD6	0.298688
								Q96AP7	ESAM	2		P06132	UROD	0.297676
								Q8NBF6	AVL9	2		Q9UMR5	PPT2	0.297156
								P10915	HAPLN1	2		Q92823	NRCAM	0.296948
								Q9BTV6	DPH7	2		Q2VWP7	PRTG	0.296948
								P00736	C1R	2		Q86UN3	RTN4RL2	0.295708
								Q9H7P6	MVB12B	2		Q9BZM4	ULBP3	0.293495
								Q8IWK6	ADGRA3	2		P15291	B4GALT1	0.292216
								P42785	PRCP	2		Q9H6B4	CLMP	0.292082
								Q9Y4D7	PLXND1	2		Q8N474	SFRP1	0.291948
								Q92954	PRG4	2		A2RUC4	TYW5	0.291681
								Q8N158	GPC2	2		Q49AR2	C5orf22	0.291614
								Q9Y3B8	REXO2	2		P26572	MGAT1	0.291348
								P62253	UBE2G1	2		Q9H7P6	MVB12B	0.289659
								O75884	RBBP9	2		Q496H8	NRN1L	0.288348
								O60888	CUTA	2		Q9NZT2	OGFR	0.287406
								Q496H8	NRN1L	2		Q16706	MAN2A1	0.282313
								P52797	EFNA3	1		Q8NBF6	AVL9	0.282313
								Q92823	NRCAM	1		Q9UJ68	MSRA	0.279189
								P56747	CLDN6	1		Q11206	ST3GAL4	0.278093
								O15327	INPP4B	1		Q8N158	GPC2	0.277608
								Q53FA7	TP53I3	1		Q4KMQ2	ANO6	0.276524
								Q9H6B4	CLMP	1		Q9UKU6	TRHDE	0.276494
								Q2VWP7	PRTG	1		P00736	C1R	0.269109
								O75326	SEMA7A	1		Q8N4A0	GALNT4	0.268316
								P00390	GSR	1		Q86WQ0	NR2C2AP	0.268316
								O00300	TNFRSF11B	1		O15327	INPP4B	0.266298
								P24043	LAMA2	1		Q13641	TPBG	0.264556
								Q9NZT2	OGFR	1		P56747	CLDN6	0.263082
								Q86WQ0	NR2C2AP	1		Q99542	MMP19	0.260448
								P42126	ECI1	1		P14543	NID1	0.260155
								Q66K79	CPZ	1		P52797	EFNA3	0.255462
								Q4KMQ2	ANO6	1		O00300	TNFRSF11B	0.251505

## Sheet: Supplementary Table 3 BeWoUP
From the dynamic PABC media vs. Static BeWo conditioned culture Network made from UPREGULATED DEPs and nonDEPs								From the dynamic PABC media vs. Static BeWo conditioned culture Netwok made from UPREGULATED DEP and nonDEPs
DEPs ranked by Degree (Top )				DEPs ranked by Closeness Centrality				nonDEPs ranked by Degree (Top )				nonDEPs ranked by Closeness Centrality				Network Visualization									Network Quick Facts
Uniprot ID	Name	Degree		Uniprot ID	Name	Closeness Centrality		Uniprot ID	Name	Degree		Uniprot ID	Name	Closeness Centrality		NOTE: A Degree-sorted circle layout has been applied to the 20 highest Degree proteins									1792	The total number of nodes (DEPs and nonDEPs) in the main connected component
P61981	YWHAG	380		P61981	YWHAG	0.518079		Q13618	CUL3	369		Q13618	CUL3	0.51898		All other proteins and the edges between them have been set to a low opacity									22592	The total number of edges in the main connected component
P27824	CANX	237		P27824	CANX	0.486024		Q9NR30	DDX21	282		Q92905	COPS5	0.484316		NOTE: the colouring of the nodes is based on Degree.									17.98	The average Degree of DEPs in the main connected component
P63104	YWHAZ	220		P63104	YWHAZ	0.482489		Q92905	COPS5	249		Q86VP6	CAND1	0.48301		Higher Degree nodes are darker blue, and lower Degree nodes are lighter blue									27.55	The average Degree of nonDEPs in the main connected component
P62249	RPS16	176		P09622	DLD	0.459702		O75152	ZC3H11A	239		Q9NR30	DDX21	0.481581
P09622	DLD	168		P04792	HSPB1	0.454108		Q86VP6	CAND1	232		P11021	HSPA5	0.479775
Q13617	CUL2	145		P19784	CSNK2A2	0.45102		O75940	SMNDC1	221		O75152	ZC3H11A	0.47494											DEPs not in the main connected component include:
P11279	LAMP1	138		Q13617	CUL2	0.448198		Q12906	ILF3	217		Q13363	CTBP1	0.474689											(CEACAM1, CEACAM5, SHBG, TFPI, ENPEP, F5, GSR, NRCAM, ACSS2, RGN, PGLYRP2, GPX3, APOBEC2, COL7A1, PCDHB13, SERPINA7)
P19784	CSNK2A2	137		P11279	LAMP1	0.447303		Q9C0B5	ZDHHC5	215		P02751	FN1	0.474563
P04792	HSPB1	114		P62249	RPS16	0.443427		Q6ZN17	LIN28B	214		O75940	SMNDC1	0.473059
P08069	IGF1R	109		Q15029	EFTUD2	0.439617		Q13616	CUL1	204		Q9C0B5	ZDHHC5	0.470944
P11388	TOP2A	106		P08069	IGF1R	0.439186		P23396	RPS3	196		Q12906	ILF3	0.469586											Results
Q15029	EFTUD2	106		P38606	ATP6V1A	0.438112		P02751	FN1	195		Q13616	CUL1	0.465195											These DEPs are both in the list of the top 20 highest Degree and top 20 highest closeness centrality lists:
Q86U44	METTL3	96		O15027	SEC16A	0.438004		Q15427	SF3B4	191		P23396	RPS3	0.465195											(CANX, CSNK2A2, CUL2, DLD, EFTUD2, HSD17B10, HSPB1, IGF1R, LAMP1, RPS16, SEC16A, SKP1, TOP2A, YWHAG, YWHAZ)
Q99714	HSD17B10	82		Q92597	NDRG1	0.437363		P62280	RPS11	190		Q15427	SF3B4	0.462791
Q15375	EPHA7	81		Q99714	HSD17B10	0.435554		Q16629	SRSF7	189		Q96FW1	OTUB1	0.462671											These nonDEPs are both in the list of the top 20 highest Degree and top 20 highest closeness centrality lists:
O00567	NOP56	67		P50454	SERPINH1	0.429806		Q4G0J3	LARP7	188		Q4G0J3	LARP7	0.462194											(CAND1, COPS5, CTBP1, CUL1, CUL3, DDX21, FN1, ILF3, LARP7, LIN28B, RBM15, RPS11, RPS3, SF3B4, SMNDC1, SRSF7, ZC3H11A, ZDHHC5)
P62277	RPS13	62		P11388	TOP2A	0.428982		Q13363	CTBP1	175		Q96T37	RBM15	0.460767
Q14980	NUMA1	61		Q5JTH9	RRP12	0.426226		Q96T37	RBM15	167		Q16629	SRSF7	0.45876
P63208	SKP1	56		P63208	SKP1	0.426023		P46777	RPL5	150		Q6ZN17	LIN28B	0.457471
O15027	SEC16A	54		P62879	GNB2	0.425012		Q93034	CUL5	142		P62280	RPS11	0.454453
P38606	ATP6V1A	54		P14923	JUP	0.424508		Q04917	YWHAH	139		P31946	YWHAB	0.451134
P56537	EIF6	53		P04844	RPN2	0.423605		Q9UN86	G3BP2	138		Q04917	YWHAH	0.450793
Q14108	SCARB2	53		Q14980	NUMA1	0.423404		P49458	SRP9	133		P62258	YWHAE	0.450453
P62879	GNB2	53		P62277	RPS13	0.41993		Q08945	SSRP1	131		Q15233	NONO	0.447638
O43242	PSMD3	52		P56537	EIF6	0.418751		P36578	RPL4	131		P46777	RPL5	0.447414
Q92597	NDRG1	51		Q86U44	METTL3	0.417775		O75821	EIF3G	130		P04626	ERBB2	0.447079
Q14203	DCTN1	51		P15924	DSP	0.416028		Q96FW1	OTUB1	129		P21796	VDAC1	0.446968
P53350	PLK1	50		P62995	TRA2B	0.414391		Q06787	FMR1	129		P14625	HSP90B1	0.446411
P46934	NEDD4	49		P49790	NUP153	0.412483		P11021	HSPA5	127		Q08945	SSRP1	0.445855
P02675	FGB	48		P06576	ATP5F1B	0.412008		O43493	TGOLN2	124		O96013	PAK4	0.444638
Q5JTH9	RRP12	47		Q13148	TARDBP	0.409746		O96013	PAK4	123		Q13619	CUL4A	0.442988
P02768	ALB	47		Q9NXV6	CDKN2AIP	0.409184		Q00839	HNRNPU	123		Q93034	CUL5	0.442878
P54764	EPHA4	46		O00567	NOP56	0.408345		Q92804	TAF15	123		Q06787	FMR1	0.442331
P46776	RPL27A	46		Q02809	PLOD1	0.407973		P31946	YWHAB	122		Q14974	KPNB1	0.442331
P61088	UBE2N	45		P53350	PLK1	0.407694		P04156	PRNP	122		O75821	EIF3G	0.441459
Q9NTU7	CBLN4	44		P28066	PSMA5	0.407416		P62258	YWHAE	119		P12004	PCNA	0.44135
P28066	PSMA5	44		P07339	CTSD	0.407323		P00441	SOD1	118		Q00839	HNRNPU	0.440807
P46531	NOTCH1	44		P46776	RPL27A	0.40603		P62753	RPS6	118		Q92804	TAF15	0.44059
P14923	JUP	42		Q6NZI2	CAVIN1	0.405663		Q9UHB9	SRP68	118		Q7Z2W4	ZC3HAV1	0.440157
P02794	FTH1	42		Q14108	SCARB2	0.405571		P62913	RPL11	116		P51114	FXR1	0.440049
P02452	COL1A1	40		O95782	AP2A1	0.405295		P04626	ERBB2	111		Q15691	MAPRE1	0.439833
P01023	A2M	40		P61088	UBE2N	0.40502		Q9Y295	DRG1	111		P07900	HSP90AA1	0.439833
P50454	SERPINH1	40		Q04721	NOTCH2	0.404563		Q15691	MAPRE1	109		Q9P0L0	VAPA	0.439833
Q99460	PSMD1	39		Q9Y4E8	USP15	0.404106		O76094	SRP72	109		P20339	RAB5A	0.438648
P49790	NUP153	38		O75150	RNF40	0.403742		P27635	RPL10	109		P00441	SOD1	0.438433
P19438	TNFRSF1A	38		P02768	ALB	0.403106		Q15233	NONO	108		Q9Y230	RUVBL2	0.438112
Q9Y4E8	USP15	38		Q14669	TRIP12	0.402291		Q15003	NCAPH	108		Q96SB4	SRPK1	0.437149
P22304	IDS	38		Q7Z6Z7	HUWE1	0.40211		Q53F19	NCBP3	105		Q07021	C1QBP	0.437149
Q04721	NOTCH2	38		Q14203	DCTN1	0.40139		Q14444	CAPRIN1	103		P67870	CSNK2B	0.43492
Q13011	ECH1	37		Q9H0H5	RACGAP1	0.40085		Q86VM9	ZC3H18	100		P55072	VCP	0.434077
P04844	RPN2	35		Q06323	PSME1	0.400761		P21796	VDAC1	99		P07237	P4HB	0.433446
Q06323	PSME1	35		P61923	COPZ1	0.399331		P50579	METAP2	99		P38919	EIF4A3	0.433341
P02792	FTL	33		Q15375	EPHA7	0.398709		Q13619	CUL4A	97		P02545	LMNA	0.433132
P61923	COPZ1	33		Q8NFA0	USP32	0.398709		P09012	SNRPA	97		P78527	PRKDC	0.433027
P20073	ANXA7	32		Q5VTR2	RNF20	0.398709		P12004	PCNA	96		O76094	SRP72	0.432713
P62995	TRA2B	32		P46934	NEDD4	0.39862		P67870	CSNK2B	96		O00429	DNM1L	0.432713
Q14669	TRIP12	32		P07355	ANXA2	0.39862		P20339	RAB5A	95		P35579	MYH9	0.432087
O75150	RNF40	31		Q93008	USP9X	0.397647		O00429	DNM1L	94		P35222	CTNNB1	0.432087
Q99816	TSG101	31		O43242	PSMD3	0.397206		Q9UKV8	AGO2	94		P35606	COPB2	0.432087
O15084	ANKRD28	31		P20073	ANXA7	0.396766		P05388	RPLP0	92		P36578	RPL4	0.431774
P27105	STOM	30		P19438	TNFRSF1A	0.396414		P62424	RPL7A	92		Q53F19	NCBP3	0.431774
Q9NXV6	CDKN2AIP	30		Q9UL46	PSME2	0.395626		P38919	EIF4A3	91		P51148	RAB5C	0.431566
Q9Y639	NPTN	30		Q7Z478	DHX29	0.395103		P62241	RPS8	91		P02786	TFRC	0.431151
Q13148	TARDBP	30		P05783	KRT18	0.395015		P42766	RPL35	91		P62753	RPS6	0.43084
P07355	ANXA2	30		Q99598	TSNAX	0.39458		Q13595	TRA2A	90		Q13418	ILK	0.430632
Q6NZI2	CAVIN1	29		Q9Y2L1	DIS3	0.39458		P39019	RPS19	89		Q9UKV8	AGO2	0.430115
Q02809	PLOD1	29		Q9NYU2	UGGT1	0.393713		Q13247	SRSF6	89		Q13595	TRA2A	0.429909
P06576	ATP5F1B	29		O00629	KPNA4	0.393453		Q15054	POLD3	89		Q9UN86	G3BP2	0.429393
P08473	MME	29		Q99460	PSMD1	0.392247		Q96SB4	SRPK1	88		P04406	GAPDH	0.428879
Q9Y4B6	DCAF1	29		P60660	MYL6	0.392161		P02545	LMNA	88		P09874	PARP1	0.428469
P54920	NAPA	28		Q8TEW0	PARD3	0.391818		P15880	RPS2	86		Q14204	DYNC1H1	0.428469
O00629	KPNA4	28		P04264	KRT1	0.391304		P22607	FGFR3	85		P62906	RPL10A	0.428264
Q96B97	SH3KBP1	28		P13674	P4HA1	0.390963		P41091	EIF2S3	85		P31947	SFN	0.428264
Q99598	TSNAX	28		Q13011	ECH1	0.390792		P51114	FXR1	84		O75955	FLOT1	0.428264
P06396	GSN	28		P27105	STOM	0.389517		Q13418	ILK	84		P30050	RPL12	0.428059
P15924	DSP	27		Q9BY44	EIF2A	0.389517		P35916	FLT4	84		Q04837	SSBP1	0.427957
P13674	P4HA1	27		P04040	CAT	0.388925		P15170	GSPT1	84		P62913	RPL11	0.427855
O95782	AP2A1	27		P13645	KRT10	0.388925		Q7L5N1	COPS6	83		Q15393	SF3B3	0.427753
Q8NFA0	USP32	25		P01023	A2M	0.388841		P26373	RPL13	82		Q9BQE3	TUBA1C	0.42765
P05783	KRT18	25		P54132	BLM	0.388756		P62306	SNRPF	81		P04156	PRNP	0.427242
Q9Y2L1	DIS3	24		P19022	CDH2	0.388672		Q9Y3U8	RPL36	80		P09012	SNRPA	0.427039
Q9H0H5	RACGAP1	24		O14828	SCAMP3	0.388672		P40429	RPL13A	79		Q14008	CKAP5	0.427039
Q7Z478	DHX29	24		P53004	BLVRA	0.388672		Q96GG9	DCUN1D1	79		Q14697	GANAB	0.426835
P98170	XIAP	24		Q86YP4	GATAD2A	0.388251		P55884	EIF3B	79		Q16643	DBN1	0.426632
P04264	KRT1	24		Q96B97	SH3KBP1	0.387746		P13693	TPT1	79		P12270	TPR	0.42653
Q9UL46	PSME2	24		P02794	FTH1	0.386909		P62917	RPL8	77		P62241	RPS8	0.426429
P54132	BLM	23		P02452	COL1A1	0.386658		P62750	RPL23A	76		Q7L5N1	COPS6	0.426429
Q9H0X4	FAM234A	23		Q9P270	SLAIN2	0.386491		Q9HCN8	SDF2L1	75		P11171	EPB41	0.426429
P08727	KRT19	23		O15084	ANKRD28	0.385908		P61247	RPS3A	75		Q9Y2W1	THRAP3	0.426429
P02647	APOA1	22		P46531	NOTCH1	0.384913		Q7Z2W4	ZC3HAV1	74		P78371	CCT2	0.426327
P19367	HK1	22		P61457	PCBD1	0.384913		P62888	RPL30	74		P15880	RPS2	0.426226
Q9H0E2	TOLLIP	22		P35611	ADD1	0.384335		Q07020	RPL18	74		Q6PKG0	LARP1	0.426124
P61457	PCBD1	22		P25311	AZGP1	0.384335		P17174	GOT1	74		Q12905	ILF2	0.426023
P04040	CAT	21		P19367	HK1	0.384087		Q07021	C1QBP	73		P18085	ARF4	0.425922
Q9BY44	EIF2A	21		P06396	GSN	0.384005		P60033	CD81	73		Q9UHB9	SRP68	0.42582
P10909	CLU	21		P98170	XIAP	0.383841		Q14974	KPNB1	72		Q86VM9	ZC3H18	0.425618
Q86YP4	GATAD2A	21		P35908	KRT2	0.383841		P35579	MYH9	72		P04843	RPN1	0.425618
Q5VTR2	RNF20	21		Q08378	GOLGA3	0.383841		O95831	AIFM1	72		P05387	RPLP2	0.425113
P05787	KRT8	20		P02675	FGB	0.383758		P18621	RPL17	72		P62306	SNRPF	0.425012
O60568	PLOD3	20		P16070	CD44	0.383676		P07900	HSP90AA1	71		Q13200	PSMD2	0.425012
Q96SB3	PPP1R9B	20		P54920	NAPA	0.383512		P35222	CTNNB1	71		P34932	HSPA4	0.424911
P15151	PVR	20		P02533	KRT14	0.383102		Q9BQG0	MYBBP1A	70		P39019	RPS19	0.42481
P49770	EIF2B2	20		Q9H3Q1	CDC42EP4	0.382365		P62899	RPL31	69		P42766	RPL35	0.42471
Q8TEW0	PARD3	20		O95208	EPN2	0.382365		P15311	EZR	69		P48634	PRRC2A	0.424609
P02533	KRT14	20		P35527	KRT9	0.381876		O75787	ATP6AP2	69		Q14978	NOLC1	0.424508
P16070	CD44	19		P08727	KRT19	0.381388		Q9P0L0	VAPA	68		Q13435	SF3B2	0.423905
Q6P1M3	LLGL2	19		Q8IWJ2	GCC2	0.38074		Q9Y230	RUVBL2	68		O95831	AIFM1	0.423805
P19022	CDH2	19		P54764	EPHA4	0.379369		P09874	PARP1	68		Q01081	U2AF1	0.423705
P35908	KRT2	19		O75146	HIP1R	0.378727		P62906	RPL10A	68		P48643	CCT5	0.423605
O60271	SPAG9	19		P13647	KRT5	0.378487		O76021	RSL1D1	68		P05023	ATP1A1	0.423504
Q13098	GPS1	18		P08473	MME	0.377928		P31947	SFN	67		Q96AG4	LRRC59	0.423504
P22735	TGM1	18		P62070	RRAS2	0.377848		Q13200	PSMD2	67		Q86UE4	MTDH	0.423104
Q5T749	KPRP	18		P31151	S100A7	0.377053		Q12888	TP53BP1	67		Q9NYF8	BCLAF1	0.423104
Q9UHY1	NRBP1	18		P05787	KRT8	0.376656		P25786	PSMA1	67		Q16531	DDB1	0.423104
P52434	POLR2H	18		P01024	C3	0.376656		P83105	HTRA4	67		P49458	SRP9	0.423004
Q7Z6Z7	HUWE1	18		Q14764	MVP	0.376419		Q16643	DBN1	66		P18077	RPL35A	0.423004
P13645	KRT10	18		Q13098	GPS1	0.376102		Q6PKG0	LARP1	66		Q9Y5B9	SUPT16H	0.422805
P02787	TF	18		Q9Y6I3	EPN1	0.375157		Q01081	U2AF1	66		P50990	CCT8	0.422505
Q93008	USP9X	18		Q9NW82	WDR70	0.374765		P61313	RPL15	65		Q13247	SRSF6	0.422406
P12273	PIP	17		P09972	ALDOC	0.374765		P46779	RPL28	65		Q9BSJ8	ESYT1	0.422306
O14828	SCAMP3	17		P10909	CLU	0.374216		P11171	EPB41	64		Q14444	CAPRIN1	0.422207
P31151	S100A7	17		Q9UEY8	ADD3	0.37406		Q12905	ILF2	64		P17844	DDX5	0.422207
P00966	ASS1	17		P58107	EPPK1	0.373436		Q86UE4	MTDH	64		P10599	TXN	0.422107
P07339	CTSD	17		P00966	ASS1	0.372272		P49407	ARRB1	64		Q15054	POLD3	0.421908
Q9NW82	WDR70	17		Q9H2C0	GAN	0.372117		P46781	RPS9	64		P61160	ACTR2	0.421809
Q68D10	SPTY2D1	17		P22304	IDS	0.37204		Q92820	GGH	64		P62899	RPL31	0.42161
P60660	MYL6	16		Q6YHK3	CD109	0.371963		P78371	CCT2	63		O00303	EIF3F	0.42161
P04004	VTN	16		Q15021	NCAPD2	0.371731		P12931	SRC	63		Q9Y490	TLN1	0.42161
Q9H3Q1	CDC42EP4	16		Q9NZT1	CALML5	0.371577		P21709	EPHA1	63		Q09028	RBBP4	0.421412
Q2TAL8	QRICH1	16		O43148	RNMT	0.371577		P61513	RPL37A	62		P39023	RPL3	0.421313
P35527	KRT9	16		Q86YZ3	HRNR	0.371577		P18077	RPL35A	61		Q9Y520	PRRC2C	0.421214
Q9UI10	EIF2B4	16		O00161	SNAP23	0.3715		Q9UHB6	LIMA1	61		Q92734	TFG	0.421016
O95274	LYPD3	16		Q9UPN7	PPP6R1	0.370884		O60832	DKC1	60		P39656	DDOST	0.420818
P13647	KRT5	16		Q8N1N4	KRT78	0.370424		Q14978	NOLC1	59		O75643	SNRNP200	0.420818
P01011	SERPINA3	15		O00764	PDXK	0.370424		P62195	PSMC5	59		P40429	RPL13A	0.420719
Q8IWV7	UBR1	15		P26006	ITGA3	0.370347		P62979	RPS27A	59		P09496	CLTA	0.420719
Q6VMQ6	ATF7IP	15		Q02413	DSG1	0.370194		Q99543	DNAJC2	59		O60716	CTNND1	0.420719
Q8IWJ2	GCC2	15		Q9Y4B6	DCAF1	0.369812		Q9BQE3	TUBA1C	58		Q15149	PLEC	0.42062
P35611	ADD1	15		Q9UHY1	NRBP1	0.369202		Q13435	SF3B2	58		P05388	RPLP0	0.420521
Q9NYU2	UGGT1	15		P02787	TF	0.369202		Q99832	CCT7	58		P27635	RPL10	0.420423
O60216	RAD21	15		P01040	CSTA	0.369202		P31943	HNRNPH1	58		Q9UHB6	LIMA1	0.420324
Q15828	CST6	15		O60568	PLOD3	0.36905		P20618	PSMB1	58		P61353	RPL27	0.420324
Q9UPN7	PPP6R1	15		Q5D862	FLG2	0.368898		Q15008	PSMD6	58		Q9BQG0	MYBBP1A	0.420225
P12109	COL6A1	15		P50748	KNTC1	0.368898		P05387	RPLP2	57		P30101	PDIA3	0.420225
P25311	AZGP1	15		P08237	PFKM	0.368822		P09496	CLTA	57		P62195	PSMC5	0.41993
P01024	C3	15		P49770	EIF2B2	0.368215		P61353	RPL27	57		P62244	RPS15A	0.419733
O75146	HIP1R	15		O15446	POLR1G	0.367988		P35998	PSMC2	56		P62750	RPL23A	0.419536
Q9Y6I3	EPN1	15		P42357	HAL	0.36746		P62140	PPP1CB	56		Q99832	CCT7	0.419045
P01040	CSTA	14		Q96SB3	PPP1R9B	0.367083		P62333	PSMC6	56		Q96GG9	DCUN1D1	0.418947
Q9Y4K0	LOXL2	14		Q8N1G2	CMTR1	0.366858		Q05682	CALD1	56		P49407	ARRB1	0.418947
P06744	GPI	14		P02792	FTL	0.366333		P35606	COPB2	55		P55884	EIF3B	0.418751
O95865	DDAH2	14		P54289	CACNA2D1	0.366333		Q9Y2W1	THRAP3	55		P62917	RPL8	0.418654
O95208	EPN2	14		Q9P2R3	ANKFY1	0.366033		P48643	CCT5	55		Q9Y3U8	RPL36	0.418556
P36954	POLR2I	14		P06744	GPI	0.36551		Q15393	SF3B3	54		Q96CT7	CCDC124	0.418556
Q12805	EFEMP1	14		Q9H0E2	TOLLIP	0.365361		Q15007	WTAP	54		P27797	CALR	0.418556
P58107	EPPK1	14		Q9BXB1	LGR4	0.364914		P43686	PSMC4	54		P25705	ATP5F1A	0.418556
Q12913	PTPRJ	14		O60216	RAD21	0.364469		P14625	HSP90B1	53		P06493	CDK1	0.418458
Q9P270	SLAIN2	14		P28838	LAP3	0.36395		P36873	PPP1CC	53		P28482	MAPK1	0.41836
Q5D862	FLG2	13		Q15904	ATP6AP1	0.362697		P62701	RPS4X	53		Q15437	SEC23B	0.41836
Q8N1N4	KRT78	13		Q9UBS9	SUCO	0.362697		P62847	RPS24	53		P31689	DNAJA1	0.418262
Q14764	MVP	13		Q9BW71	HIRIP3	0.362477		O00231	PSMD11	53		P05198	EIF2S1	0.418067
Q13217	DNAJC3	13		Q16610	ECM1	0.362404		P17813	ENG	53		P50402	EMD	0.418067
Q9NZT1	CALML5	13		Q9HD45	TM9SF3	0.361818		P04406	GAPDH	52		Q00341	HDLBP	0.417872
Q13228	SELENBP1	13		Q99816	TSG101	0.361745		P48634	PRRC2A	52		P08195	SLC3A2	0.417872
P62070	RRAS2	13		Q15828	CST6	0.361745		P49368	CCT3	52		P36873	PPP1CC	0.417775
P26006	ITGA3	13		P15151	PVR	0.361599		Q15020	SART3	52		O75400	PRPF40A	0.417483
O43148	RNMT	13		Q9Y4K0	LOXL2	0.361526		P62841	RPS15	52		Q08380	LGALS3BP	0.417385
Q96KB5	PBK	13		Q9Y639	NPTN	0.361453		Q13523	PRP4K	52		P37198	NUP62	0.417288
O15446	POLR1G	13		P02647	APOA1	0.361453		O00267	SUPT5H	52		P61289	PSME3	0.417288
P69905	HBA2	13		P09104	ENO2	0.361453		Q02543	RPL18A	52		P31943	HNRNPH1	0.417191
Q9Y3B3	TMED7	13		Q8WUQ7	CACTIN	0.360943		P61160	ACTR2	51		Q86V81	ALYREF	0.417191
P34059	GALNS	13		P05089	ARG1	0.360943		P60866	RPS20	51		Q13347	EIF3I	0.416997
Q8WVV4	POF1B	13		P02765	AHSG	0.36087		Q5SSJ5	HP1BP3	51		P20618	PSMB1	0.416899
Q9UF33	EPHA6	13		Q5T749	KPRP	0.360652		Q14152	EIF3A	51		P62701	RPS4X	0.416899
P16383	GCFC2	12		Q9BVG4	PBDC1	0.360507		P17980	PSMC3	51		P26373	RPL13	0.416415
Q15021	NCAPD2	12		Q08188	TGM3	0.360145		P39023	RPL3	50		Q12888	TP53BP1	0.416318
Q9Y5K8	ATP6V1D	12		O00469	PLOD2	0.359134		Q86V81	ALYREF	50		P51149	RAB7A	0.416318
O00469	PLOD2	12		Q9UI10	EIF2B4	0.35899		P46782	RPS5	50		P62424	RPL7A	0.416221
P53004	BLVRA	12		P04004	VTN	0.3582		P40227	CCT6A	50		O43707	ACTN4	0.416221
P31431	SDC4	12		Q12872	SFSWAP	0.357771		Q99497	PARK7	50		P35998	PSMC2	0.416125
O15232	MATN3	12		Q9NTU7	CBLN4	0.357485		Q92522	H1-10	50		P61313	RPL15	0.416028
P04114	APOB	12		P02788	LTF	0.357342		P51148	RAB5C	49		P22607	FGFR3	0.415931
O75348	ATP6V1G1	12		Q15631	TSN	0.357271		Q9NYF8	BCLAF1	48		P30086	PEBP1	0.415931
Q6YHK3	CD109	12		Q86YQ8	CPNE8	0.357129		P50990	CCT8	48		Q9P2E9	RRBP1	0.415931
Q7Z7H5	TMED4	12		Q8WVV4	POF1B	0.356773		P62244	RPS15A	48		P62888	RPL30	0.415835
Q08378	GOLGA3	12		O14773	TPP1	0.356205		P06493	CDK1	48		P62140	PPP1CB	0.415835
O75843	AP1G2	12		P22735	TGM1	0.355639		Q9H307	PNN	48		P35613	BSG	0.415835
P47224	RABIF	12		P14735	IDE	0.354935		Q03135	CAV1	48		O14744	PRMT5	0.415835
Q86YZ3	HRNR	12		P52434	POLR2H	0.354513		P55036	PSMD4	48		Q9H444	CHMP4B	0.415738
P48960	ADGRE5	12		Q68D10	SPTY2D1	0.354163		P49720	PSMB3	48		Q02878	RPL6	0.415642
O00161	SNAP23	12		O75131	CPNE3	0.354093		Q02878	RPL6	47		Q9H3P7	ACBD3	0.415545
Q8WUA7	TBC1D22A	11		Q96KB5	PBK	0.353254		P46087	NOP2	47		P53985	SLC16A1	0.415545
P02788	LTF	11		Q6UWP8	SBSN	0.352837		Q9H8Y8	GORASP2	47		P62847	RPS24	0.415353
Q15631	TSN	11		Q12913	PTPRJ	0.35249		Q15428	SF3A2	47		Q9ULX6	AKAP8L	0.415353
O14786	NRP1	11		Q6VMQ6	ATF7IP	0.352282		P62191	PSMC1	47		Q15003	NCAPH	0.415256
Q14344	GNA13	11		Q9Y5K8	ATP6V1D	0.352212		O43240	KLK10	47		P46782	RPS5	0.415256
P04179	SOD2	11		P48740	MASP1	0.352143		Q14204	DYNC1H1	46		Q15007	WTAP	0.41516
P00751	CFB	11		P01011	SERPINA3	0.352074		Q09028	RBBP4	46		P60866	RPS20	0.41516
Q15904	ATP6AP1	11		P04114	APOB	0.352074		P39656	DDOST	46		P53618	COPB1	0.41516
O95084	PRSS23	11		P61626	LYZ	0.352074		P51149	RAB7A	46		P41252	IARS1	0.414871
Q02413	DSG1	11		Q96HY6	DDRGK1	0.352005		P18124	RPL7	46		P46781	RPS9	0.414775
Q16610	ECM1	11		P07225	PROS1	0.351797		P08581	MET	46		Q5SSJ5	HP1BP3	0.414679
Q32P28	P3H1	11		P00751	CFB	0.35159		Q96GQ7	DDX27	46		Q8WVM8	SCFD1	0.414583
Q8WUQ7	CACTIN	11		O15394	NCAM2	0.351521		Q13895	BYSL	46		P62829	RPL23	0.414487
Q12841	FSTL1	11		O60271	SPAG9	0.351314		O76024	WFS1	46		O60884	DNAJA2	0.414487
Q12872	SFSWAP	10		P31431	SDC4	0.351314		Q9UNM6	PSMD13	46		P07814	EPRS1	0.414487
Q8WV92	MITD1	10		Q9UMF0	ICAM5	0.351108		P17844	DDX5	45		P47897	QARS1	0.414391
Q9H2C0	GAN	10		Q14703	MBTPS1	0.351039		P30101	PDIA3	45		Q01082	SPTBN1	0.414391
P39060	COL18A1	10		P01009	SERPINA1	0.35097		Q13347	EIF3I	45		P16989	YBX3	0.414296
P50748	KNTC1	10		P17050	NAGA	0.350558		P60228	EIF3E	45		O76021	RSL1D1	0.4142
Q9UMF0	ICAM5	10		Q13217	DNAJC3	0.349941		Q13177	PAK2	45		P35916	FLT4	0.414104
P61626	LYZ	10		O95865	DDAH2	0.349873		Q7L2H7	EIF3M	45		P22392	NME2	0.414008
Q9C0E2	XPO4	10		P12273	PIP	0.349395		P17987	TCP1	45		Q15084	PDIA6	0.414008
P02679	FGG	10		Q9BZI7	UPF3B	0.349327		P11717	IGF2R	45		P62333	PSMC6	0.413913
P08123	COL1A2	10		Q6P1M3	LLGL2	0.349259		P30050	RPL12	44		O14974	PPP1R12A	0.413913
P01033	TIMP1	10		P51884	LUM	0.348851		Q92734	TFG	44		P46779	RPL28	0.413817
O75131	CPNE3	10		Q8WUA7	TBC1D22A	0.348579		O75643	SNRNP200	44		Q9H307	PNN	0.413721
Q9BW71	HIRIP3	10		Q32P28	P3H1	0.348579		O75400	PRPF40A	44		Q9BUF5	TUBB6	0.413626
P21266	GSTM3	10		P13987	CD59	0.348579		Q1KMD3	HNRNPUL2	44		P62979	RPS27A	0.41353
P07711	CTSL	10		Q13740	ALCAM	0.348444		P24941	CDK2	44		Q9UHX1	PUF60	0.41353
Q96KP1	EXOC2	9		Q96QA5	GSDMA	0.348173		Q93009	USP7	44		P42224	STAT1	0.413435
Q08188	TGM3	9		Q96HE7	ERO1A	0.347699		Q96KR1	ZFR	44		Q9BQA1	WDR77	0.413244
P09972	ALDOC	9		P22413	ENPP1	0.347699		Q9UBQ5	EIF3K	44		Q86UP2	KTN1	0.412768
P09104	ENO2	9		Q12805	EFEMP1	0.347497		O43172	PRPF4	44		Q1KMD3	HNRNPUL2	0.412483
Q68D85	NCR3LG1	9		Q13362	PPP2R5C	0.347497		P62269	RPS18	44		Q07020	RPL18	0.412198
P17050	NAGA	9		P78504	JAG1	0.34716		P50991	CCT4	44		P25786	PSMA1	0.412198
Q9UEY8	ADD3	9		P69905	HBA2	0.347093		P52292	KPNA2	44		Q96CW1	AP2M1	0.412198
Q8NFJ5	GPRC5A	9		O95239	KIF4A	0.347093		O15372	EIF3H	44		Q14566	MCM6	0.412198
P05161	ISG15	9		Q14165	MLEC	0.346757		Q06418	TYRO3	44		P45880	VDAC2	0.412198
Q6UWP8	SBSN	9		P34059	GALNS	0.346355		O00560	SDCBP	44		P24941	CDK2	0.412008
P01009	SERPINA1	8		Q9H0X4	FAM234A	0.346221		P62829	RPL23	43		O43390	HNRNPR	0.412008
Q6ZVX7	NCCRP1	8		Q9UF33	EPHA6	0.346221		P22392	NME2	43		P62857	RPS28	0.411819
P02765	AHSG	8		Q96P63	SERPINB12	0.34602		Q9NZB2	FAM120A	43		Q01813	PFKP	0.411819
Q99435	NELL2	8		P48960	ADGRE5	0.345619		P37108	SRP14	43		Q9H0D6	XRN2	0.411724
Q96PY5	FMNL2	8		O14786	NRP1	0.345619		P20700	LMNB1	43		P53396	ACLY	0.411724
P51884	LUM	8		O95274	LYPD3	0.345419		O15371	EIF3D	43		P13693	TPT1	0.41163
Q14165	MLEC	8		Q9Y3B3	TMED7	0.344688		Q9NZI8	IGF2BP1	43		Q12874	SF3A3	0.41163
P42357	HAL	8		Q8IWV7	UBR1	0.343367		Q8IWX8	CHERP	43		P15311	EZR	0.411535
P19823	ITIH2	8		O15232	MATN3	0.343367		O14579	COPE	43		P40227	CCT6A	0.411535
O95749	GGPS1	8		Q2TAL8	QRICH1	0.343103		Q8N3V7	SYNPO	43		P06753	TPM3	0.411535
Q13362	PPP2R5C	8		O95302	FKBP9	0.343103		P49721	PSMB2	43		Q9UQE7	SMC3	0.41144
Q9H173	SIL1	8		Q7Z7H5	TMED4	0.342644		Q15714	TSC22D1	43		O43493	TGOLN2	0.411251
Q9H2X0	CHRD	8		Q96B23	ARK2N	0.342382		Q13451	FKBP5	43		P61513	RPL37A	0.410968
Q96B23	ARK2N	8		P36954	POLR2I	0.342055		P51665	PSMD7	43		P46060	RANGAP1	0.410968
P52788	SMS	8		P01033	TIMP1	0.34199		P04843	RPN1	42		Q9UPN3	MACF1	0.410874
Q9UBS9	SUCO	8		P21266	GSTM3	0.341859		P30086	PEBP1	42		P49368	CCT3	0.410686
Q96HY6	DDRGK1	8		Q8NFJ5	GPRC5A	0.341533		Q9ULX6	AKAP8L	42		Q15436	SEC23A	0.410686
P12035	KRT3	7		P08123	COL1A2	0.341468		P17096	HMGA1	42		P78344	EIF4G2	0.410591
P49747	COMP	7		O00115	DNASE2	0.341468		P60900	PSMA6	42		Q9Y295	DRG1	0.410121
O94919	ENDOD1	7		P04179	SOD2	0.341338		O14818	PSMA7	42		Q99497	PARK7	0.410121
Q86YQ8	CPNE8	7		P08236	GUSB	0.341338		Q13153	PAK1	42		P60228	EIF3E	0.410121
P78504	JAG1	7		Q8WV92	MITD1	0.341143		P25787	PSMA2	42		P06733	ENO1	0.410121
Q96HE7	ERO1A	7		Q13228	SELENBP1	0.340494		Q99436	PSMB7	42		P62861	FAU	0.410027
P14735	IDE	7		Q9H173	SIL1	0.3403		Q16531	DDB1	41		P09211	GSTP1	0.410027
P22413	ENPP1	7		O75348	ATP6V1G1	0.340106		O00303	EIF3F	41		O60832	DKC1	0.409934
P01344	IGF2	7		P00750	PLAT	0.340106		P37198	NUP62	41		Q93009	USP7	0.409934
Q08174	PCDH1	7		Q9H2X0	CHRD	0.339913		O43390	HNRNPR	41		Q9HCN8	SDF2L1	0.40984
P28838	LAP3	7		P12035	KRT3	0.339526		P62857	RPS28	41		Q96KR1	ZFR	0.40984
Q6ZRP7	QSOX2	7		P16383	GCFC2	0.339397		P83731	RPL24	41		Q9UKV3	ACIN1	0.40984
P20933	AGA	7		Q96KP1	EXOC2	0.33914		P19525	EIF2AK2	41		O43491	EPB41L2	0.40984
O95239	KIF4A	7		P02679	FGG	0.338691		P54652	HSPA2	41		A5YKK6	CNOT1	0.40984
P00747	PLG	7		O95084	PRSS23	0.33818		P07237	P4HB	40		P83731	RPL24	0.409746
O00468	AGRN	7		Q6ZVX7	NCCRP1	0.337797		P78527	PRKDC	40		P61964	WDR5	0.409652
P00750	PLAT	7		P20930	FLG	0.337415		P02786	TFRC	40		Q9BUJ2	HNRNPUL1	0.409652
Q12765	SCRN1	7		Q68D85	NCR3LG1	0.337034		Q15149	PLEC	40		Q5T6F2	UBAP2	0.409559
P13987	CD59	7		Q8NCW5	NAXE	0.337034		P28482	MAPK1	40		Q5JTV8	TOR1AIP1	0.409559
Q9Y2E5	MAN2B2	7		Q14344	GNA13	0.336781		P61289	PSME3	40		Q14683	SMC1A	0.409371
Q9P2R3	ANKFY1	7		P49747	COMP	0.335896		P16989	YBX3	40		Q9Y224	RTRAF	0.409278
P02458	COL2A1	7		P01008	SERPINC1	0.335456		Q96CW1	AP2M1	40		Q9Y5Q8	GTF3C5	0.409278
Q9HD45	TM9SF3	7		P00918	CA2	0.335393		Q9ULW0	TPX2	40		Q13177	PAK2	0.409184
Q9Y2H0	DLGAP4	7		P47224	RABIF	0.334954		Q9BRJ6	C7orf50	40		O75367	MACROH2A1	0.409184
Q9BZI7	UPF3B	7		O75843	AP1G2	0.334829		Q9Y5K5	UCHL5	40		Q8TEM1	NUP210	0.409184
Q9UNK4	PLA2G2D	6		Q08554	DSC1	0.334641		Q96CT7	CCDC124	39		Q14152	EIF3A	0.409091
P08237	PFKM	6		P12109	COL6A1	0.334267		P53621	COPA	39		Q92522	H1-10	0.408997
Q96QA5	GSDMA	6		Q92879	CELF1	0.334142		O00487	PSMD14	39		Q9ULW0	TPX2	0.408997
Q86UD1	OAF	6		P13686	ACP5	0.333955		P21802	FGFR2	39		Q05682	CALD1	0.408904
P35030	PRSS3	6		O94919	ENDOD1	0.33383		O00159	MYO1C	39		Q15020	SART3	0.408904
Q13740	ALCAM	6		P05161	ISG15	0.333582		P49755	TMED10	39		Q13492	PICALM	0.408904
P05089	ARG1	6		P05452	CLEC3B	0.333209		Q9Y262	EIF3L	39		P61247	RPS3A	0.408811
Q9UBX7	KLK11	6		Q6KB66	KRT80	0.333085		P49184	DNASE1L1	39		P07195	LDHB	0.408717
Q8IXQ4	GPALPP1	6		Q9UI42	CPA4	0.331851		P55072	VCP	38		Q9UBQ5	EIF3K	0.408345
O94760	DDAH1	6		Q08174	PCDH1	0.331483		Q14008	CKAP5	38		P46459	NSF	0.408345
P08236	GUSB	6		Q96PY5	FMNL2	0.330992		Q9Y5B9	SUPT16H	38		P05556	ITGB1	0.408252
O95302	FKBP9	6		P39060	COL18A1	0.330931		P62266	RPS23	38		O95819	MAP4K4	0.408252
Q14703	MBTPS1	6		Q9NZH6	IL37	0.330443		P62820	RAB1A	38		P42566	EPS15	0.408159
Q9BTT6	LRRC1	6		P22223	CDH3	0.330321		Q6P2Q9	PRPF8	38		Q92616	GCN1	0.408159
P09467	FBP1	6		P30405	PPIF	0.33026		P41743	PRKCI	38		Q9NZB2	FAM120A	0.407973
Q9UI42	CPA4	6		Q9Y3R5	DOP1B	0.330138		P63173	RPL38	38		P52272	HNRNPM	0.407973
O00764	PDXK	6		Q9P2B2	PTGFRN	0.330017		Q14676	MDC1	38		Q07666	KHDRBS1	0.407973
Q13636	RAB31	6		P20933	AGA	0.329956		P29317	EPHA2	38		O43172	PRPF4	0.40788
Q9P2B2	PTGFRN	6		P42765	ACAA2	0.329288		P51608	MECP2	38		Q96P70	IPO9	0.40788
Q14508	WFDC2	6		P09467	FBP1	0.328564		P29350	PTPN6	38		P62269	RPS18	0.407601
P48740	MASP1	5		P13591	NCAM1	0.328564		P28070	PSMB4	38		Q6P2E9	EDC4	0.407601
Q6P1N9	TATDN1	5		P01344	IGF2	0.328323		Q8WVK2	SNRNP27	38		P22061	PCMT1	0.407509
Q8N2S1	LTBP4	5		Q9UBG0	MRC2	0.328202		P10599	TXN	37		P62841	RPS15	0.407231
P13591	NCAM1	5		Q15517	CDSN	0.327662		P47897	QARS1	37		Q9Y5A9	YTHDF2	0.407231
Q96P63	SERPINB12	5		Q14508	WFDC2	0.327542		Q9BQA1	WDR77	37		P46087	NOP2	0.406953
Q9NRF9	POLE3	5		Q6ZRP7	QSOX2	0.327362		Q86UP2	KTN1	37		Q9Y6G9	DYNC1LI1	0.406861
Q7Z794	KRT77	5		O00468	AGRN	0.327183		O43290	SART1	37		P62266	RPS23	0.406676
Q53T59	HS1BP3	5		O95749	GGPS1	0.327004		Q96FJ2	DYNLL2	37		Q5T4S7	UBR4	0.406676
Q92879	CELF1	5		P52788	SMS	0.326944		Q86Y82	STX12	37		P26358	DNMT1	0.406215
Q7Z7E8	UBE2Q1	5		O60701	UGDH	0.326586		Q9UHD9	UBQLN2	37		Q9P2J5	LARS1	0.406122
P05452	CLEC3B	5		Q8IXQ4	GPALPP1	0.326527		P05198	EIF2S1	36		P17980	PSMC3	0.40603
P02748	C9	5		Q9Y2H0	DLGAP4	0.326408		P35613	BSG	36		Q9HB71	CACYBP	0.405938
Q8N1G2	CMTR1	5		Q9C0E2	XPO4	0.326111		Q9H444	CHMP4B	36		P12814	ACTN1	0.405938
P30405	PPIF	5		Q9BXJ4	C1QTNF3	0.326111		P62861	FAU	36		P51610	HCFC1	0.405846
Q04756	HGFAC	5		P02461	COL3A1	0.325755		P28074	PSMB5	36		O75369	FLNB	0.405846
Q9NZH6	IL37	5		P35030	PRSS3	0.325459		P46778	RPL21	36		P13861	PRKAR2A	0.405663
O15394	NCAM2	5		Q9NPH0	ACP6	0.3254		P25788	PSMA3	36		Q13523	PRP4K	0.405571
Q9BXB1	LGR4	5		Q12765	SCRN1	0.325104		Q99575	POP1	36		P53621	COPA	0.405571
Q9BVG4	PBDC1	5		P07711	CTSL	0.324927		Q15811	ITSN1	36		P62820	RAB1A	0.405479
O94851	MICAL2	5		P16870	CPE	0.324751		Q9UMX0	UBQLN1	36		Q6P2Q9	PRPF8	0.405479
Q6UX71	PLXDC2	5		P26927	MST1	0.32428		P34932	HSPA4	35		P18754	RCC1	0.405479
Q6IA69	NADSYN1	5		P02748	C9	0.323636		Q9Y520	PRRC2C	35		Q10567	AP1B1	0.405479
P01008	SERPINC1	5		Q9NVS9	PNPO	0.323577		O43707	ACTN4	35		Q12931	TRAP1	0.405387
P54289	CACNA2D1	5		O94760	DDAH1	0.323519		O14744	PRMT5	35		P42166	TMPO	0.405387
P78330	PSPH	5		P29373	CRABP2	0.323402		O14974	PPP1R12A	35		P33176	KIF5B	0.405295
Q96RE7	NACC1	5		Q9NRF9	POLE3	0.323227		P52272	HNRNPM	35		P80723	BASP1	0.405295
P13686	ACP5	5		Q9UJC5	SH3BGRL2	0.323169		Q99623	PHB2	35		P18621	RPL17	0.405112
P48163	ME1	4		Q7Z794	KRT77	0.32311		P21860	ERBB3	35		P28074	PSMB5	0.40502
P00734	F2	4		Q13636	RAB31	0.323052		P08708	RPS17	35		P41091	EIF2S3	0.404929
Q14117	DPYS	4		Q6IA69	NADSYN1	0.322994		Q5UIP0	RIF1	35		P50991	CCT4	0.404929
P16870	CPE	4		Q9NPH3	IL1RAP	0.322994		P50613	CDK7	35		P37108	SRP14	0.404929
P02749	APOH	4		O94851	MICAL2	0.322935		P27797	CALR	34		P20700	LMNB1	0.404837
Q9Y646	CPQ	4		P00734	F2	0.322703		P25705	ATP5F1A	34		Q9Y678	COPG1	0.404837
O14773	TPP1	4		Q12841	FSTL1	0.322586		P31689	DNAJA1	34		Q7L2H7	EIF3M	0.404746
P20930	FLG	4		Q6UX71	PLXDC2	0.32247		O60884	DNAJA2	34		Q9UKG1	APPL1	0.404746
P42765	ACAA2	4		P55290	CDH13	0.322122		Q9UHX1	PUF60	34		P78406	RAE1	0.404563
Q9NYQ6	CELSR1	4		P12107	COL11A1	0.321949		Q12931	TRAP1	34		P17987	TCP1	0.404472
Q08554	DSC1	4		Q99519	NEU1	0.321775		P30876	POLR2B	34		O15371	EIF3D	0.404472
P08697	SERPINF2	4		Q9BTT6	LRRC1	0.321659		O60341	KDM1A	34		P43246	MSH2	0.404472
Q99519	NEU1	4		Q9BS40	LXN	0.320738		Q9H2U1	DHX36	34		P83105	HTRA4	0.404289
P12429	ANXA3	4		Q9UBX7	KLK11	0.320394		P09661	SNRPA1	34		Q15645	TRIP13	0.404198
Q15517	CDSN	4		Q9H008	LHPP	0.319479		P18031	PTPN1	34		P12931	SRC	0.404106
Q99985	SEMA3C	4		P00747	PLG	0.31891		P98172	EFNB1	34		O00231	PSMD11	0.404106
P29373	CRABP2	4		Q9UHL4	DPP7	0.31891		P51572	BCAP31	34		O00267	SUPT5H	0.404106
P05156	CFI	4		Q9Y2E5	MAN2B2	0.31857		Q96RS6	NUDCD1	34		Q14137	BOP1	0.404015
Q9NVS9	PNPO	4		P05156	CFI	0.317497		Q1ED39	KNOP1	34		P30040	ERP29	0.404015
P22223	CDH3	4		Q53T59	HS1BP3	0.317216		P18085	ARF4	33		Q92820	GGH	0.403924
Q9Y3R5	DOP1B	4		P03951	F11	0.317216		P42224	STAT1	33		Q9NZI8	IGF2BP1	0.403924
P55290	CDH13	4		Q86UD1	OAF	0.316599		Q12874	SF3A3	33		Q8IWX8	CHERP	0.403924
Q8N0V5	GCNT2	3		Q6IQ49	SDE2	0.316431		Q9UQE7	SMC3	33		Q9BRJ6	C7orf50	0.403924
Q9BXJ4	C1QTNF3	3		Q9UNK4	PLA2G2D	0.316319		P46060	RANGAP1	33		P19525	EIF2AK2	0.403833
Q9BY67	CADM1	3		Q12860	CNTN1	0.315929		Q9UKV3	ACIN1	33		Q06265	EXOSC9	0.403742
O60701	UGDH	3		Q96RE7	NACC1	0.31565		P61964	WDR5	33		Q13501	SQSTM1	0.403651
P00742	F10	3		Q14117	DPYS	0.31515		Q13501	SQSTM1	33		P61163	ACTR1A	0.403651
Q9H1Z4	WDR13	3		Q99985	SEMA3C	0.31515		P43307	SSR1	33		P17096	HMGA1	0.40356
Q9NPH3	IL1RAP	3		P78330	PSPH	0.315095		Q96I25	RBM17	33		P30876	POLR2B	0.403469
Q9UHL4	DPP7	3		Q99435	NELL2	0.314211		Q6P1J9	CDC73	33		P00338	LDHA	0.403378
Q12860	CNTN1	3		P02458	COL2A1	0.3141		P84095	RHOG	33		O14579	COPE	0.403197
Q6KB66	KRT80	3		Q04756	HGFAC	0.313825		P04439	HLA-A	33		P17174	GOT1	0.403106
Q9GZU2	PEG3	3		O00584	RNASET2	0.313441		Q9NQ29	LUC7L	33		O60749	SNX2	0.403106
Q9H008	LHPP	3		P19823	ITIH2	0.312838		Q99523	SORT1	33		P52292	KPNA2	0.403015
Q9H4D0	CLSTN2	3		P48163	ME1	0.312784		Q9NWT1	PAK1IP1	33		P60033	CD81	0.402834
Q6UXD5	SEZ6L2	3		Q13822	ENPP2	0.312347		P05023	ATP1A1	32		P30048	PRDX3	0.402743
Q0VDG4	SCRN3	3		Q5T750	KPLCE	0.311967		P50402	EMD	32		Q9UBB4	ATXN10	0.402743
Q8NCW5	NAXE	3		P00450	CP	0.311046		Q14566	MCM6	32		P18124	RPL7	0.402653
Q5T750	KPLCE	3		P02774	GC	0.310991		Q9H0D6	XRN2	32		O43290	SART1	0.402653
P04155	TFF1	3		Q9NYQ6	CELSR1	0.310937		Q9Y224	RTRAF	32		P17812	CTPS1	0.402653
P00918	CA2	3		Q7Z7E8	UBE2Q1	0.310184		P42566	EPS15	32		Q15008	PSMD6	0.402291
Q9NPH0	ACP6	3		Q9GZU2	PEG3	0.31013		Q9UKG1	APPL1	32		P50579	METAP2	0.402201
Q99584	S100A13	3		P32004	L1CAM	0.309701		Q9UNE7	STUB1	32		P55060	CSE1L	0.40211
P03951	F11	3		Q6P1N9	TATDN1	0.309647		Q5JSZ5	PRRC2B	32		P46778	RPL21	0.40202
Q9H1B7	IRF2BPL	3		Q86SJ2	AMIGO2	0.30922		Q96MU7	YTHDC1	32		P17612	PRKACA	0.40193
P01031	C5	3		Q7L266	ASRGL1	0.309006		Q13438	OS9	32		P41743	PRKCI	0.40184
Q9BS40	LXN	3		Q06033	ITIH3	0.308687		Q14118	DAG1	32		Q9Y3B4	SF3B6	0.40184
P02774	GC	3		O95155	UBE4B	0.307785		Q04837	SSBP1	31		Q9Y5X1	SNX9	0.40175
P35443	THBS4	3		Q9H4D0	CLSTN2	0.307257		O60716	CTNND1	31		Q99623	PHB2	0.40166
P00450	CP	3		P04155	TFF1	0.307204		Q00341	HDLBP	31		O75531	BANF1	0.40166
P07225	PROS1	2		P20742	PZP	0.305475		P41252	IARS1	31		P43307	SSR1	0.40157
Q86SJ2	AMIGO2	2		Q0VDG4	SCRN3	0.305059		Q8WVM8	SCFD1	31		Q00325	SLC25A3	0.40139
Q9HC84	MUC5B	2		P15941	MUC1	0.304592		P06753	TPM3	31		Q92620	DHX38	0.4013
P20742	PZP	2		Q6UXD5	SEZ6L2	0.303456		Q9BUJ2	HNRNPUL1	31		P14868	DARS1	0.40121
O00300	TNFRSF11B	2		P00742	F10	0.302636		O75367	MACROH2A1	31		O75396	SEC22B	0.40121
P06727	APOA4	2		P08697	SERPINF2	0.302534		P46459	NSF	31		Q03135	CAV1	0.40112
Q15063	POSTN	2		Q99574	SERPINI1	0.302278		Q14137	BOP1	31		Q3MHD2	LSM12	0.40112
O76076	CCN5	2		P55285	CDH6	0.301769		P12830	CDH1	31		P60900	PSMA6	0.400761
Q9HCB6	SPON1	2		Q6DD87	ZNF787	0.301668		P25789	PSMA4	31		O14818	PSMA7	0.400761
Q99574	SERPINI1	2		Q8NDH3	NPEPL1	0.301312		O75368	SH3BGRL	31		Q96I25	RBM17	0.400761
Q9UJC5	SH3BGRL2	2		P12429	ANXA3	0.30116		Q15018	ABRAXAS2	31		P35580	MYH10	0.400761
P15941	MUC1	2		Q15063	POSTN	0.30116		O75955	FLOT1	30		P21860	ERBB3	0.400402
P43652	AFM	2		Q99584	S100A13	0.301008		O43491	EPB41L2	30		P42285	MTREX	0.400402
Q9NX62	BPNT2	2		Q8N8N7	PTGR2	0.299398		Q14683	SMC1A	30		P63220	RPS21	0.400313
P05546	SERPIND1	2		P34096	RNASE4	0.299348		P05556	ITGB1	30		Q9H6T3	RPAP3	0.400313
P34096	RNASE4	2		Q9UJA9	ENPP5	0.298799		Q07666	KHDRBS1	30		P55265	ADAR	0.400134
Q6DD87	ZNF787	2		Q9H1Z4	WDR13	0.297904		P18754	RCC1	30		Q8WUM4	PDCD6IP	0.400134
O00584	RNASET2	2		Q8N2S1	LTBP4	0.297706		P63220	RPS21	30		O00505	KPNA3	0.400045
O95671	ASMTL	2		O00622	CCN1	0.297657		O00505	KPNA3	30		O60341	KDM1A	0.399866
P98088	MUC5AC	2		O14960	LECT2	0.297607		P13667	PDIA4	30		P12268	IMPDH2	0.399866
Q8IUL8	CILP2	2		Q9HC84	MUC5B	0.297508		P49207	RPL34	30		P08581	MET	0.399777
P02771	AFP	2		P98088	MUC5AC	0.297508		O75822	EIF3J	30		P25788	PSMA3	0.399777
O14960	LECT2	2		P06727	APOA4	0.296916		P28072	PSMB6	30		Q8N3V7	SYNPO	0.399688
P19827	ITIH1	2		P19827	ITIH1	0.296916		P30622	CLIP1	30		P55735	SEC13	0.399598
O00115	DNASE2	2		P35443	THBS4	0.296327		Q15262	PTPRK	30		O15372	EIF3H	0.399509
Q9UBG0	MRC2	2		Q9BY67	CADM1	0.29618		Q13033	STRN3	30		Q96GQ7	DDX27	0.39942
P32004	L1CAM	2		P02771	AFP	0.296082		Q14697	GANAB	29		Q9UHR4	BAIAP2L1	0.399242
O00622	CCN1	2		P02749	APOH	0.295496		Q9BSJ8	ESYT1	29		Q15424	SAFB	0.399153
O95155	UBE4B	2		Q8N6C5	IGSF1	0.295155		Q08380	LGALS3BP	29		Q9H9B1	EHMT1	0.399153
P26927	MST1	1		Q8N1P7	CRYBG2	0.293078		Q01082	SPTBN1	29		P63173	RPL38	0.399064
P12107	COL11A1	1		Q8IUL8	CILP2	0.292695		P78344	EIF4G2	29		P54819	AK2	0.398975
Q8N1P7	CRYBG2	1		Q9H446	RWDD1	0.290888		Q9HB71	CACYBP	29		Q6P1J9	CDC73	0.398709
P02461	COL3A1	1		O95671	ASMTL	0.288127		P61163	ACTR1A	29		O95425	SVIL	0.398709
P16112	ACAN	1		Q9BRF8	CPPED1	0.287942		Q9Y3B4	SF3B6	29		P15927	RPA2	0.398709
Q96RW7	HMCN1	1		Q6P9B6	MEAK7	0.287896		O95373	IPO7	29		P48444	ARCN1	0.39862
Q7L266	ASRGL1	1		Q13630	GFUS	0.287342		O95817	BAG3	29		Q9H8Y8	GORASP2	0.398443
O15240	VGF	1		O76076	CCN5	0.285965		P20042	EIF2S2	29		O95373	IPO7	0.398443
Q13641	TPBG	1		Q9NQ36	SCUBE2	0.2856		P61019	RAB2A	29		Q9H4G0	EPB41L1	0.398443
Q9BRF8	CPPED1	1		Q9NX62	BPNT2	0.28415		O15234	CASC3	29		P49721	PSMB2	0.398266
Q9H1E1	RNASE7	1		Q9H1E1	RNASE7	0.283745		P24928	POLR2A	29		P41250	GARS1	0.398177
Q9H446	RWDD1	1		P05546	SERPIND1	0.283521		Q96KQ7	EHMT2	29		Q13153	PAK1	0.398
Q15582	TGFBI	1		P01031	C5	0.279189		P09497	CLTB	29		Q9H2U1	DHX36	0.397823
Q14914	PTGR1	1		P02753	RBP4	0.279015		O76071	CIAO1	29		Q06418	TYRO3	0.397735
P55285	CDH6	1		P43652	AFM	0.277588		Q96AG4	LRRC59	28		Q9UNE7	STUB1	0.397647
Q9UBW5	BIN2	1		Q14624	ITIH4	0.275411		Q9Y490	TLN1	28		P13667	PDIA4	0.397558
Q14515	SPARCL1	1		Q8N0V5	GCNT2	0.275242		Q9P2E9	RRBP1	28		P27694	RPA1	0.397558
Q9NQ36	SCUBE2	1		Q14914	PTGR1	0.273519		P07814	EPRS1	28		P43686	PSMC4	0.39747
P18564	ITGB6	1		Q16270	IGFBP7	0.273519		Q9BUF5	TUBB6	28		P55036	PSMD4	0.39747
P16930	FAH	1		Q14515	SPARCL1	0.272354		P45880	VDAC2	28		P84095	RHOG	0.39747
Q13822	ENPP2	1		P54108	CRISP3	0.272271		Q13492	PICALM	28		Q9BTC0	DIDO1	0.39747
P10643	C7	1		P18564	ITGB6	0.271982		P12814	ACTN1	28		P18206	VCL	0.39747
Q8NDH3	NPEPL1	1		O00300	TNFRSF11B	0.270217		P51610	HCFC1	28		P08708	RPS17	0.397382
Q14624	ITIH4	1		Q9H1B7	IRF2BPL	0.268838		Q9Y678	COPG1	28		P49321	NASP	0.397029
Q16270	IGFBP7	1		Q9Y646	CPQ	0.265609		Q15075	EEA1	28		Q02543	RPL18A	0.396941
Q8N8N7	PTGR2	1		Q96RW7	HMCN1	0.263382		Q8IZP0	ABI1	28		Q13895	BYSL	0.396941
Q6IQ49	SDE2	1		Q9HCB6	SPON1	0.258181		Q9BS26	ERP44	28		P04439	HLA-A	0.396941
Q96D15	RCN3	1		Q9UBW5	BIN2	0.257921		Q13257	MAD2L1	28		Q6NZY4	ZCCHC8	0.396941
P54108	CRISP3	1		P16930	FAH	0.255967		Q15084	PDIA6	27		P49750	YLPM1	0.396854
Q06033	ITIH3	1		P15514	AREG	0.248577		O95819	MAP4K4	27		Q9UBF2	COPG2	0.39659
O95497	VNN1	1		Q8N4A0	GALNT4	0.242847		P22061	PCMT1	27		Q03252	LMNB2	0.396502
Q13630	GFUS	1		O95497	VNN1	0.239663		P14868	DARS1	27		O95817	BAG3	0.396414
Q9UJA9	ENPP5	1		Q13641	TPBG	0.238768		O15160	POLR1C	27		Q9NR09	BIRC6	0.396414
Q12884	FAP	1		Q96D15	RCN3	0.238007		P49756	RBM25	27		O15160	POLR1C	0.396327
P02753	RBP4	1		P32754	HPD	0.232235		Q9NYL9	TMOD3	27		O76024	WFS1	0.396239
P32754	HPD	1		O15240	VGF	0.232085		Q13404	UBE2V1	27		P20042	EIF2S2	0.396239
Q8N6C5	IGSF1	1		Q15582	TGFBI	0.231485		Q12792	TWF1	27		O75787	ATP6AP2	0.396064
P15514	AREG	1		P16112	ACAN	0.225937		Q9UNS2	COPS3	27		Q29RF7	PDS5A	0.396064
Q8N4A0	GALNT4	1		Q12884	FAP	0.222264		Q9ULR3	PPM1H	27		Q15714	TSC22D1	0.395889
Q6P9B6	MEAK7	1		P10643	C7	0.218282		P61106	RAB14	27		Q9Y2Z0	SUGT1	0.395801
								Q9H3N1	TMX1	27		O60763	USO1	0.395714
								O15400	STX7	27		P52789	HK2	0.395714
								Q8WVY7	UBLCP1	27		O94992	HEXIM1	0.395626
								O14672	ADAM10	27		O76003	GLRX3	0.395452
								Q01973	ROR1	27		O00487	PSMD14	0.395364
								Q9NR12	PDLIM7	27		P29401	TKT	0.395103
								Q9Y6G9	DYNC1LI1	26		Q9NQ29	LUC7L	0.395015
								Q06265	EXOSC9	26		Q9BXS5	AP1M1	0.395015
								Q00325	SLC25A3	26		P04062	GBA1	0.394841
								P55735	SEC13	26		Q15428	SF3A2	0.394754
								O95425	SVIL	26		P11717	IGF2R	0.394754
								P49750	YLPM1	26		P61019	RAB2A	0.394754
								Q13123	IK	26		Q9H3S7	PTPN23	0.394754
								P07305	H1-0	26		Q15370	ELOB	0.394754
								Q9Y4Z0	LSM4	26		P67936	TPM4	0.394754
								P10155	RO60	26		Q9HAV4	XPO5	0.394754
								Q9Y3B9	RRP15	26		P49915	GMPS	0.394754
								Q13526	PIN1	26		O15234	CASC3	0.394667
								P60510	PPP4C	26		P55196	AFDN	0.39458
								Q9NY97	B3GNT2	26		Q99733	NAP1L4	0.394493
								P06730	EIF4E	26		P49411	TUFM	0.39432
								Q99471	PFDN5	26		P21802	FGFR2	0.394233
								Q9BXS4	TMEM59	26		O43813	LANCL1	0.394233
								Q5T6F2	UBAP2	25		P62191	PSMC1	0.394146
								Q9Y5Q8	GTF3C5	25		Q15075	EEA1	0.394146
								Q92616	GCN1	25		Q96JB5	CDK5RAP3	0.394146
								Q10567	AP1B1	25		Q14671	PUM1	0.394146
								P33176	KIF5B	25		P00367	GLUD1	0.394059
								P17612	PRKACA	25		P40926	MDH2	0.393973
								P42285	MTREX	25		P52565	ARHGDIA	0.393886
								Q9H6T3	RPAP3	25		Q92841	DDX17	0.393799
								P55265	ADAR	25		O75390	CS	0.393799
								P15927	RPA2	25		P26640	VARS1	0.393799
								Q9BTC0	DIDO1	25		Q5JSZ5	PRRC2B	0.393713
								Q9Y2Z0	SUGT1	25		Q14232	EIF2B1	0.393626
								Q9NQG5	RPRD1B	25		P43034	PAFAH1B1	0.39354
								Q92973	TNPO1	25		Q13123	IK	0.393453
								Q14694	USP10	25		Q99590	SCAF11	0.393453
								O43815	STRN	25		Q14839	CHD4	0.393367
								P48556	PSMD8	25		Q8IZP0	ABI1	0.393281
								O75832	PSMD10	25		P37802	TAGLN2	0.393281
								O00233	PSMD9	25		P12277	CKB	0.393281
								P08195	SLC3A2	24		P60174	TPI1	0.393281
								P06733	ENO1	24		P07305	H1-0	0.393108
								A5YKK6	CNOT1	24		Q99575	POP1	0.392935
								Q6P2E9	EDC4	24		P24928	POLR2A	0.392935
								P12268	IMPDH2	24		P49756	RBM25	0.392935
								Q6NZY4	ZCCHC8	24		Q9P2N5	RBM27	0.392935
								Q9NR09	BIRC6	24		Q9H2G2	SLK	0.392849
								O94992	HEXIM1	24		Q8TEX9	IPO4	0.392849
								Q9H3S7	PTPN23	24		Q9BT78	COPS4	0.392591
								P00367	GLUD1	24		Q99496	RNF2	0.392419
								Q14232	EIF2B1	24		Q8WXH0	SYNE2	0.392333
								Q14839	CHD4	24		P09661	SNRPA1	0.392161
								Q92576	PHF3	24		Q92576	PHF3	0.392161
								Q13561	DCTN2	24		Q9Y2A7	NCKAP1	0.392161
								Q14240	EIF4A2	24		Q15907	RAB11B	0.392075
								Q9Y6E0	STK24	24		P14314	PRKCSH	0.391904
								Q15363	TMED2	24		Q9H3P2	NELFA	0.391732
								Q9C0C9	UBE2O	24		Q13144	EIF2B5	0.391732
								P61006	RAB8A	24		P38117	ETFB	0.391647
								Q8NBJ4	GOLM1	24		Q9NU22	MDN1	0.391647
								Q16401	PSMD5	24		P20020	ATP2B1	0.391647
								P12270	TPR	23		Q96SI9	STRBP	0.391561
								P53618	COPB1	23		Q96MU7	YTHDC1	0.391475
								P53396	ACLY	23		Q14676	MDC1	0.391304
								Q5JTV8	TOR1AIP1	23		P49207	RPL34	0.391304
								Q9P2J5	LARS1	23		Q99615	DNAJC7	0.391304
								P78406	RAE1	23		P49720	PSMB3	0.391133
								Q15645	TRIP13	23		P18669	PGAM1	0.390877
								P00338	LDHA	23		P54709	ATP1B3	0.390707
								P30048	PRDX3	23		P18031	PTPN1	0.390622
								O75531	BANF1	23		Q96KQ7	EHMT2	0.390622
								O75396	SEC22B	23		P52701	MSH6	0.390536
								Q15424	SAFB	23		P13796	LCP1	0.390536
								P18206	VCL	23		O00159	MYO1C	0.390451
								Q9UBF2	COPG2	23		O75822	EIF3J	0.390451
								Q29RF7	PDS5A	23		Q9NQG5	RPRD1B	0.390451
								P49411	TUFM	23		Q9C0C2	TNKS1BP1	0.390451
								Q92841	DDX17	23		O00560	SDCBP	0.390366
								Q9BT78	COPS4	23		Q7Z3T8	ZFYVE16	0.390281
								Q15907	RAB11B	23		Q92922	SMARCC1	0.389941
								Q9H3P2	NELFA	23		Q92692	NECTIN2	0.389856
								Q13144	EIF2B5	23		Q15811	ITSN1	0.389687
								Q96SI9	STRBP	23		Q9HC35	EML4	0.389602
								Q7KZ85	SUPT6H	23		P50851	LRBA	0.389602
								Q8N3E9	PLCD3	23		Q9UNM6	PSMD13	0.389348
								P59998	ARPC4	23		Q99961	SH3GL1	0.389348
								Q8NC42	RNF149	23		Q5UIP0	RIF1	0.389263
								Q9NZL4	HSPBP1	23		Q9NYL9	TMOD3	0.389094
								P54105	CLNS1A	23		P98172	EFNB1	0.38901
								Q9GZZ9	UBA5	23		Q9H4M9	EHD1	0.38901
								Q9NPF4	OSGEP	23		P51572	BCAP31	0.388925
								Q8TAF3	WDR48	23		Q9ULU4	ZMYND8	0.388925
								P23284	PPIB	23		Q92878	RAD50	0.388588
								Q92466	DDB2	23		P15170	GSPT1	0.388503
								Q96KG9	SCYL1	23		P35520	CBS	0.388335
								Q14192	FHL2	23		P27448	MARK3	0.388335
								Q15437	SEC23B	22		P30041	PRDX6	0.388335
								Q9H3P7	ACBD3	22		Q13451	FKBP5	0.388251
								Q15436	SEC23A	22		P51665	PSMD7	0.388166
								Q96P70	IPO9	22		Q9BS26	ERP44	0.387746
								Q9Y5X1	SNX9	22		Q969S3	ZNF622	0.387746
								Q8WUM4	PDCD6IP	22		P51531	SMARCA2	0.387746
								Q9UHR4	BAIAP2L1	22		Q15293	RCN1	0.387746
								P48444	ARCN1	22		P49755	TMED10	0.387578
								Q9H4G0	EPB41L1	22		Q13561	DCTN2	0.387578
								P27694	RPA1	22		Q96RT1	ERBIN	0.387495
								P04062	GBA1	22		P11117	ACP2	0.387495
								Q96JB5	CDK5RAP3	22		Q13404	UBE2V1	0.387411
								Q9P2N5	RBM27	22		Q9UPT8	ZC3H4	0.387243
								P54709	ATP1B3	22		Q9BRK5	SDF4	0.387243
								Q969S3	ZNF622	22		Q15276	RABEP1	0.38716
								Q9UPT8	ZC3H4	22		P31483	TIA1	0.38716
								P55769	SNU13	22		P55769	SNU13	0.386992
								Q02880	TOP2B	22		P56192	MARS1	0.386909
								Q05209	PTPN12	22		P29317	EPHA2	0.386825
								O95747	OXSR1	22		Q12792	TWF1	0.386825
								Q8N4C8	MINK1	22		Q99417	MYCBP	0.386825
								O43924	PDE6D	22		P53990	IST1	0.386658
								P61011	SRP54	22		P29144	TPP2	0.386658
								O60508	CDC40	22		Q96RS6	NUDCD1	0.385908
								Q6IN85	PPP4R3A	22		Q9Y4Z0	LSM4	0.385908
								P01137	TGFB1	22		P18615	NELFE	0.385825
								Q06546	GABPA	22		O14617	AP3D1	0.385825
								Q96ER3	SAAL1	22		Q9UNS2	COPS3	0.385576
								P53985	SLC16A1	21		Q13564	NAE1	0.385576
								P13861	PRKAR2A	21		Q02880	TOP2B	0.385493
								P42166	TMPO	21		Q9UNF1	MAGED2	0.385493
								Q9UBB4	ATXN10	21		P61201	COPS2	0.38541
								Q92620	DHX38	21		Q9ULR3	PPM1H	0.385244
								Q15370	ELOB	21		P17858	PFKL	0.385244
								Q99590	SCAF11	21		Q02487	DSC2	0.385244
								Q99496	RNF2	21		P61086	UBE2K	0.385161
								Q92922	SMARCC1	21		Q9UI12	ATP6V1H	0.385078
								P51531	SMARCA2	21		Q27J81	INF2	0.38483
								P61201	COPS2	21		Q96C19	EFHD2	0.384748
								Q27J81	INF2	21		Q05209	PTPN12	0.384665
								P21281	ATP6V1B2	21		P21281	ATP6V1B2	0.384665
								O15127	SCAMP2	21		Q99523	SORT1	0.384582
								Q9UNP9	PPIE	21		Q6IBS0	TWF2	0.384417
								Q9Y3C6	PPIL1	21		Q14257	RCN2	0.384417
								O00743	PPP6C	21		P09497	CLTB	0.384335
								Q00765	REEP5	21		P12830	CDH1	0.384252
								P99999	CYCS	21		O95747	OXSR1	0.384087
								Q9HD42	CHMP1A	21		Q99439	CNN2	0.384087
								Q9UHV9	PFDN2	21		O60664	PLIN3	0.384005
								Q92696	RABGGTA	21		Q92973	TNPO1	0.383923
								P54259	ATN1	21		P50613	CDK7	0.383841
								Q01813	PFKP	20		Q7KZ85	SUPT6H	0.383841
								Q9UPN3	MACF1	20		P09417	QDPR	0.383841
								P09211	GSTP1	20		Q8N3E9	PLCD3	0.383676
								P07195	LDHB	20		Q9NTJ3	SMC4	0.383676
								Q9Y5A9	YTHDF2	20		Q8TC07	TBC1D15	0.383594
								Q5T4S7	UBR4	20		Q9NWT1	PAK1IP1	0.38343
								P26358	DNMT1	20		O43592	XPOT	0.383102
								O75369	FLNB	20		Q16204	CCDC6	0.382938
								P43246	MSH2	20		Q9Y262	EIF3L	0.382856
								O60749	SNX2	20		O43447	PPIH	0.382856
								P55060	CSE1L	20		P50453	SERPINB9	0.382692
								Q3MHD2	LSM12	20		Q9UMX0	UBQLN1	0.382529
								Q9H9B1	EHMT1	20		P59998	ARPC4	0.382529
								O60763	USO1	20		P51659	HSD17B4	0.382529
								P67936	TPM4	20		P11047	LAMC1	0.382529
								Q99733	NAP1L4	20		Q15102	PAFAH1B3	0.382529
								P43034	PAFAH1B1	20		Q8N4C8	MINK1	0.382447
								Q9H2G2	SLK	20		O75340	PDCD6	0.382365
								Q99615	DNAJC7	20		O60841	EIF5B	0.382284
								Q15293	RCN1	20		P08758	ANXA5	0.381958
								P56192	MARS1	20		P08133	ANXA6	0.381958
								P18615	NELFE	20		Q8TD19	NEK9	0.381876
								O75340	PDCD6	20		Q92609	TBC1D5	0.381876
								Q8TD19	NEK9	20		Q9P206	NHSL3	0.381795
								P14635	CCNB1	20		Q9UNH7	SNX6	0.381714
								O15145	ARPC3	20		P61106	RAB14	0.381551
								Q53EL6	PDCD4	20		Q9H3N1	TMX1	0.381307
								P08779	KRT16	20		O94979	SEC31A	0.381307
								Q8TAA9	VANGL1	20		O60678	PRMT3	0.381307
								Q16513	PKN2	20		Q96FJ2	DYNLL2	0.381226
								Q9Y333	LSM2	20		P08754	GNAI3	0.380983
								Q9NY27	PPP4R2	20		P35659	DEK	0.380983
								Q9NV70	EXOC1	20		Q99798	ACO2	0.380983
								P41208	CETN2	20		O00273	DFFA	0.380902
								Q9H2J4	PDCL3	20		P21709	EPHA1	0.380821
								P80723	BASP1	19		P04181	OAT	0.380821
								P41250	GARS1	19		Q96D46	NMD3	0.380821
								O76003	GLRX3	19		Q86Y82	STX12	0.38074
								Q9HAV4	XPO5	19		O76071	CIAO1	0.38074
								P55196	AFDN	19		P10155	RO60	0.38074
								Q14671	PUM1	19		O14737	PDCD5	0.38074
								Q99961	SH3GL1	19		P11233	RALA	0.380659
								Q96RT1	ERBIN	19		Q9UNN5	FAF1	0.380578
								Q15276	RABEP1	19		P51608	MECP2	0.380497
								P53990	IST1	19		Q9H3K6	BOLA2B	0.380497
								Q9UI12	ATP6V1H	19		Q01650	SLC7A5	0.380416
								O60841	EIF5B	19		Q12768	WASHC5	0.380416
								P08758	ANXA5	19		Q13409	DYNC1I2	0.380336
								Q9P206	NHSL3	19		P25787	PSMA2	0.380255
								O14737	PDCD5	19		Q9Y3B9	RRP15	0.380174
								Q8N6T3	ARFGAP1	19		O43240	KLK10	0.380013
								Q2M2I8	AAK1	19		O15498	YKT6	0.379932
								Q9BTC8	MTA3	19		Q9BQ52	ELAC2	0.379852
								Q9H074	PAIP1	19		O43924	PDE6D	0.379771
								P12532	CKMT1B	19		P29350	PTPN6	0.37961
								Q15599	NHERF2	19		Q9NVJ2	ARL8B	0.37953
								P29372	MPG	19		Q13438	OS9	0.379449
								Q4G148	GXYLT1	19		Q96B26	EXOSC8	0.379208
								P54727	RAD23B	19		Q9NSE4	IARS2	0.379208
								Q13868	EXOSC2	19		Q14694	USP10	0.379128
								Q92876	KLK6	19		P62495	ETF1	0.378967
								Q9Y3A3	MOB4	19		Q04760	GLO1	0.378967
								P28062	PSMB8	19		Q14240	EIF4A2	0.378887
								P35580	MYH10	18		Q8N6T3	ARFGAP1	0.378887
								P49321	NASP	18		Q9P013	CWC15	0.378887
								Q03252	LMNB2	18		Q96TC7	RMDN3	0.378647
								Q8WXH0	SYNE2	18		P07686	HEXB	0.378647
								Q9Y2A7	NCKAP1	18		P22102	GART	0.378567
								Q9ULU4	ZMYND8	18		P35573	AGL	0.378407
								Q92878	RAD50	18		O00148	DDX39A	0.378008
								P35520	CBS	18		P43490	NAMPT	0.378008
								P27448	MARK3	18		Q9BTE3	MCMBP	0.378008
								Q16204	CCDC6	18		P28070	PSMB4	0.377928
								P51659	HSD17B4	18		P00505	GOT2	0.377928
								Q9UNH7	SNX6	18		O15400	STX7	0.377848
								Q96B26	EXOSC8	18		Q96F07	CYFIP2	0.377848
								Q96F07	CYFIP2	18		Q14118	DAG1	0.377689
								Q9NP72	RAB18	18		Q96DG6	CMBL	0.377689
								Q01130	SRSF2	18		Q8NFC6	BOD1L1	0.37753
								O94973	AP2A2	18		P25789	PSMA4	0.37745
								Q16539	MAPK14	18		P09493	TPM1	0.37745
								P08253	MMP2	18		P28072	PSMB6	0.377291
								Q8NI27	THOC2	18		Q13526	PIN1	0.377291
								Q4V328	GRIPAP1	18		O43815	STRN	0.377053
								P07384	CAPN1	18		O14497	ARID1A	0.377053
								Q92636	NSMAF	18		O95251	KAT7	0.376973
								P49356	FNTB	18		P46939	UTRN	0.376498
								P15289	ARSA	18		P17813	ENG	0.376419
								Q8N392	ARHGAP18	18		P14635	CCNB1	0.376419
								P09758	TACSTD2	18		Q4KMP7	TBC1D10B	0.376419
								Q8TEM1	NUP210	17		Q6PGP7	SKIC3	0.37634
								P17812	CTPS1	17		Q9UKF6	CPSF3	0.376261
								P54819	AK2	17		Q13257	MAD2L1	0.376181
								P52789	HK2	17		Q9NP72	RAB18	0.375945
								Q9BXS5	AP1M1	17		Q99543	DNAJC2	0.375787
								P52565	ARHGDIA	17		P05091	ALDH2	0.375708
								O75390	CS	17		P49257	LMAN1	0.375629
								Q8TEX9	IPO4	17		Q9NR50	EIF2B3	0.37555
								Q9HC35	EML4	17		Q9BT73	PSMG3	0.375472
								P17858	PFKL	17		Q01130	SRSF2	0.375314
								Q6IBS0	TWF2	17		Q12959	DLG1	0.375314
								O43447	PPIH	17		Q15738	NSDHL	0.375314
								Q9UNN5	FAF1	17		P31350	RRM2	0.375314
								O15498	YKT6	17		O15075	DCLK1	0.375079
								P09493	TPM1	17		Q9BTY2	FUCA2	0.375079
								P46939	UTRN	17		Q9Y5K5	UCHL5	0.375
								O60256	PRPSAP2	17		Q2M2I8	AAK1	0.374921
								P06756	ITGAV	17		Q6WKZ4	RAB11FIP1	0.374921
								Q15019	SEPTIN2	17		Q96J02	ITCH	0.374843
								O60826	CCDC22	17		Q8TBX8	PIP4K2C	0.374765
								O15511	ARPC5	17		O15145	ARPC3	0.374686
								Q9UHF1	EGFL7	17		Q53EL6	PDCD4	0.374608
								Q02952	AKAP12	17		Q8NE71	ABCF1	0.374608
								Q9UBC2	EPS15L1	17		Q9BTC8	MTA3	0.374529
								Q9UQ13	SHOC2	17		Q12830	BPTF	0.374373
								Q9BT09	CNPY3	17		P30622	CLIP1	0.374295
								Q9Y2A9	B3GNT3	17		O94973	AP2A2	0.374295
								P17655	CAPN2	17		P60510	PPP4C	0.374138
								P62310	LSM3	17		Q9NY97	B3GNT2	0.374138
								Q9NWV8	BABAM1	17		O60256	PRPSAP2	0.374138
								Q96DA0	ZG16B	17		Q9H074	PAIP1	0.37406
								Q15024	EXOSC7	17		P08779	KRT16	0.373982
								Q9UBX5	FBLN5	17		P54652	HSPA2	0.373748
								P30040	ERP29	16		P06756	ITGAV	0.373514
								P40926	MDH2	16		P09543	CNP	0.373514
								P37802	TAGLN2	16		O15127	SCAMP2	0.373203
								P30041	PRDX6	16		Q01433	AMPD2	0.373203
								Q9BRK5	SDF4	16		P55268	LAMB2	0.373047
								P61086	UBE2K	16		Q7Z434	MAVS	0.37297
								P11047	LAMC1	16		P12532	CKMT1B	0.372814
								O00148	DDX39A	16		Q12849	GRSF1	0.372737
								P49257	LMAN1	16		Q53SF7	COBLL1	0.372659
								Q9NR50	EIF2B3	16		Q8NC42	RNF149	0.372504
								Q12959	DLG1	16		Q9H2D6	TRIOBP	0.372504
								Q9H2D6	TRIOBP	16		Q8WVY7	UBLCP1	0.372427
								P35609	ACTN2	16		Q15019	SEPTIN2	0.372427
								P54725	RAD23A	16		P16435	POR	0.372427
								Q8IXH7	NELFCD	16		O15541	RNF113A	0.372427
								O00291	HIP1	16		P55011	SLC12A2	0.372117
								P02538	KRT6A	16		O94966	USP19	0.37204
								P08648	ITGA5	16		P35609	ACTN2	0.371963
								Q92747	ARPC1A	16		Q9BQ70	TCF25	0.371808
								Q14789	GOLGB1	16		Q9UNP9	PPIE	0.371654
								P61769	B2M	16		Q9NZL4	HSPBP1	0.371577
								Q12972	PPP1R8	16		Q8TAA9	VANGL1	0.371423
								O43657	TSPAN6	16		O60826	CCDC22	0.371423
								P53041	PPP5C	16		P61026	RAB10	0.371423
								O15230	LAMA5	16		Q9NX46	ADPRS	0.371423
								P12110	COL6A2	16		P24666	ACP1	0.371346
								P12277	CKB	15		O15511	ARPC5	0.371269
								P14314	PRKCSH	15		P49184	DNASE1L1	0.370961
								Q9C0C2	TNKS1BP1	15		P61011	SRP54	0.370961
								P31483	TIA1	15		P54105	CLNS1A	0.370884
								Q99417	MYCBP	15		O43583	DENR	0.370577
								Q14257	RCN2	15		Q9NZM1	MYOF	0.370577
								O43592	XPOT	15		O14672	ADAM10	0.370424
								P04181	OAT	15		Q99536	VAT1	0.370347
								Q9NVJ2	ARL8B	15		Q8NBJ5	COLGALT1	0.370271
								Q9P013	CWC15	15		P07954	FH	0.370194
								Q96TC7	RMDN3	15		Q01973	ROR1	0.369888
								Q96DG6	CMBL	15		P13804	ETFA	0.369888
								Q9BT73	PSMG3	15		P04259	KRT6B	0.369812
								Q12830	BPTF	15		Q16513	PKN2	0.369736
								Q7Z434	MAVS	15		Q16539	MAPK14	0.369736
								P50995	ANXA11	15		Q9UHF1	EGFL7	0.369736
								Q05655	PRKCD	15		P30533	LRPAP1	0.369659
								P56545	CTBP2	15		O75368	SH3BGRL	0.369355
								O75976	CPD	15		P50995	ANXA11	0.369355
								Q7Z6E9	RBBP6	15		Q9Y6W5	WASF2	0.369278
								P47929	LGALS7B	15		P23921	RRM1	0.369278
								P61956	SUMO2	15		Q8IZA0	KIAA0319L	0.369202
								P07942	LAMB1	15		P22059	OSBP	0.369126
								Q9UIA9	XPO7	15		Q96TA1	NIBAN2	0.369126
								Q9HAU5	UPF2	15		P13646	KRT13	0.36905
								P02649	APOE	15		Q5T0W9	FAM83B	0.36905
								Q99747	NAPG	15		O60508	CDC40	0.368974
								P32456	GBP2	15		Q05655	PRKCD	0.368974
								Q14696	MESD	15		P16278	GLB1	0.368974
								Q9ULJ7	ANKRD50	15		Q9GZZ9	UBA5	0.368822
								Q676U5	ATG16L1	15		P54725	RAD23A	0.368822
								P29401	TKT	14		Q9UGI8	TES	0.368594
								P26640	VARS1	14		Q8WVK2	SNRNP27	0.368443
								P60174	TPI1	14		O75487	GPC4	0.368367
								P52701	MSH6	14		O95359	TACC2	0.368367
								Q92692	NECTIN2	14		O43818	RRP9	0.368291
								P50851	LRBA	14		Q8IXH7	NELFCD	0.36814
								Q9H4M9	EHD1	14		P49959	MRE11	0.36814
								Q8TC07	TBC1D15	14		Q53H96	PYCR3	0.367988
								Q15102	PAFAH1B3	14		P15374	UCHL3	0.367988
								Q92609	TBC1D5	14		P30740	SERPINB1	0.367913
								Q13409	DYNC1I2	14		Q99719	SEPTIN5	0.367837
								Q9NSE4	IARS2	14		P48556	PSMD8	0.367762
								P62495	ETF1	14		Q9Y333	LSM2	0.367762
								O95251	KAT7	14		P08253	MMP2	0.367762
								Q9UKF6	CPSF3	14		Q9UKY7	CDV3	0.367686
								O15075	DCLK1	14		Q15018	ABRAXAS2	0.367611
								Q01433	AMPD2	14		Q9P287	BCCIP	0.367535
								P55268	LAMB2	14		Q9NPF4	OSGEP	0.36746
								P61026	RAB10	14		O75882	ATRN	0.36746
								P09668	CTSH	14		Q96ST3	SIN3A	0.367385
								Q9UNF0	PACSIN2	14		Q8NI27	THOC2	0.367234
								Q96MX6	DNAAF10	14		Q6P1N0	CC2D1A	0.367234
								Q96J01	THOC3	14		Q8WU90	ZC3H15	0.367008
								Q8N3U4	STAG2	14		Q9Y3C6	PPIL1	0.366933
								Q6UXH1	CRELD2	14		Q15262	PTPRK	0.366633
								P21579	SYT1	14		P35237	SERPINB6	0.366633
								Q9BVL2	NUP58	14		Q96MW1	CCDC43	0.366558
								P20908	COL5A1	14		P54577	YARS1	0.366408
								O60911	CTSV	14		Q02952	AKAP12	0.366333
								Q9H8W4	PLEKHF2	14		Q4V328	GRIPAP1	0.366108
								Q9H8J5	MANSC1	14		O00291	HIP1	0.366033
								O43813	LANCL1	13		Q52LJ0	FAM98B	0.365734
								P38117	ETFB	13		Q9Y6E0	STK24	0.365659
								P29144	TPP2	13		Q15599	NHERF2	0.365659
								O14617	AP3D1	13		Q9NR12	PDLIM7	0.365585
								Q9UNF1	MAGED2	13		P13797	PLS3	0.365585
								Q02487	DSC2	13		O43237	DYNC1LI2	0.365585
								P08133	ANXA6	13		Q9P265	DIP2B	0.36551
								O94979	SEC31A	13		P29372	MPG	0.365287
								Q01650	SLC7A5	13		P51688	SGSH	0.365287
								P07686	HEXB	13		Q13308	PTK7	0.365287
								O14497	ARID1A	13		O43719	HTATSF1	0.365287
								Q6PGP7	SKIC3	13		Q2TAY7	SMU1	0.364989
								P05091	ALDH2	13		P02538	KRT6A	0.364914
								Q15738	NSDHL	13		P20810	CAST	0.364766
								Q8TBX8	PIP4K2C	13		P11216	PYGB	0.364692
								P16435	POR	13		Q15363	TMED2	0.364617
								O94966	USP19	13		P08648	ITGA5	0.364617
								P13646	KRT13	13		P56545	CTBP2	0.364617
								O43818	RRP9	13		O00743	PPP6C	0.364469
								P49959	MRE11	13		Q96PU5	NEDD4L	0.364469
								Q53H96	PYCR3	13		P40925	MDH1	0.364469
								Q8WU90	ZC3H15	13		Q9C0C9	UBE2O	0.364395
								P18084	ITGB5	13		Q9NRB3	CHST12	0.364395
								P26374	CHML	13		Q07960	ARHGAP1	0.364246
								P61960	UFM1	13		Q9NVA2	SEPTIN11	0.364246
								Q6UWB1	IL27RA	13		Q00765	REEP5	0.364024
								P00738	HP	13		Q9BZZ5	API5	0.36395
								P49354	FNTA	13		Q16775	HAGH	0.36395
								Q92797	SYMPK	13		P99999	CYCS	0.363876
								O43633	CHMP2A	13		A0MZ66	SHTN1	0.363803
								Q9Y3D6	FIS1	13		O75976	CPD	0.363655
								P11234	RALB	13		Q9UBC2	EPS15L1	0.363507
								O15496	PLA2G10	13		P09668	CTSH	0.362918
								O14530	TXNDC9	13		P20340	RAB6A	0.362918
								Q9BRR6	ADPGK	13		Q6UX04	CWC27	0.362918
								Q9NU22	MDN1	12		Q15833	STXBP2	0.362844
								P20020	ATP2B1	12		Q4G148	GXYLT1	0.362697
								P18669	PGAM1	12		Q8TAF3	WDR48	0.362624
								Q7Z3T8	ZFYVE16	12		Q9UHD9	UBQLN2	0.362551
								O60664	PLIN3	12		P23284	PPIB	0.362477
								P50453	SERPINB9	12		Q7L1Q6	BZW1	0.362257
								P08754	GNAI3	12		Q6IN85	PPP4R3A	0.362038
								P35659	DEK	12		Q9BVK6	TMED9	0.361891
								P43490	NAMPT	12		Q96AC1	FERMT2	0.361818
								P00505	GOT2	12		P07384	CAPN1	0.361745
								P31350	RRM2	12		Q9UBE0	SAE1	0.361745
								P55011	SLC12A2	12		P55786	NPEPPS	0.361672
								Q9BQ70	TCF25	12		Q04695	KRT17	0.361599
								O43583	DENR	12		P61006	RAB8A	0.361526
								P13804	ETFA	12		P54727	RAD23B	0.361526
								P04259	KRT6B	12		P07602	PSAP	0.361453
								P30533	LRPAP1	12		Q9HD42	CHMP1A	0.361307
								Q99719	SEPTIN5	12		Q9UBV7	B4GALT7	0.361307
								Q9P287	BCCIP	12		Q7Z6E9	RBBP6	0.361234
								Q96ST3	SIN3A	12		P61966	AP1S1	0.361162
								P13797	PLS3	12		P06280	GLA	0.361089
								O43237	DYNC1LI2	12		P30566	ADSL	0.361089
								P51688	SGSH	12		P04632	CAPNS1	0.360943
								Q2TAY7	SMU1	12		Q9UQ13	SHOC2	0.360725
								Q9BVK6	TMED9	12		Q13428	TCOF1	0.360652
								P23229	ITGA6	12		O95685	PPP1R3D	0.360435
								Q69YN2	CWF19L1	12		P51805	PLXNA3	0.360362
								Q9Y5X3	SNX5	12		Q99436	PSMB7	0.36029
								Q96EE3	SEH1L	12		Q92747	ARPC1A	0.360145
								Q12846	STX4	12		Q1ED39	KNOP1	0.36
								Q96D71	REPS1	12		P23229	ITGA6	0.359855
								P23458	JAK1	12		Q13867	BLMH	0.359855
								P53611	RABGGTB	12		Q9NQX3	GPHN	0.359711
								Q92599	SEPTIN8	12		P06730	EIF4E	0.359566
								Q15382	RHEB	12		Q9H773	DCTPP1	0.359566
								Q9NXU5	ARL15	12		Q9BT09	CNPY3	0.359422
								Q13232	NME3	12		Q9UNF0	PACSIN2	0.359278
								Q9BV40	VAMP8	12		P47929	LGALS7B	0.359062
								P14780	MMP9	12		Q16698	DECR1	0.35899
								P23634	ATP2B4	12		P01137	TGFB1	0.358846
								Q10471	GALNT2	12		Q9NY27	PPP4R2	0.358343
								P33151	CDH5	12		P61956	SUMO2	0.358343
								O00461	GOLIM4	12		Q14789	GOLGB1	0.358057
								O15162	PLSCR1	12		P98160	HSPG2	0.358057
								Q9BW83	IFT27	12		Q9Y617	PSAT1	0.357914
								Q13361	MFAP5	12		Q9BX40	LSM14B	0.357842
								O94766	B3GAT3	12		Q96MX6	DNAAF10	0.357628
								P13796	LCP1	11		Q13112	CHAF1B	0.357556
								P11117	ACP2	11		P61769	B2M	0.357485
								O60678	PRMT3	11		Q13868	EXOSC2	0.357414
								Q9H3K6	BOLA2B	11		Q8IV08	PLD3	0.357414
								P35573	AGL	11		Q92466	DDB2	0.357342
								Q8NFC6	BOD1L1	11		Q9UHV9	PFDN2	0.357271
								Q6WKZ4	RAB11FIP1	11		O75832	PSMD10	0.3572
								Q9Y6W5	WASF2	11		Q96J01	THOC3	0.3572
								Q6P1N0	CC2D1A	11		Q15477	SKIC2	0.357129
								Q13308	PTK7	11		Q99614	TTC1	0.357129
								O43719	HTATSF1	11		P07942	LAMB1	0.356986
								P20810	CAST	11		Q8NBJ4	GOLM1	0.356915
								Q96PU5	NEDD4L	11		Q92783	STAM	0.356844
								Q9NRB3	CHST12	11		Q12972	PPP1R8	0.356702
								Q07960	ARHGAP1	11		Q9HB07	MYG1	0.356631
								Q13428	TCOF1	11		Q9NV70	EXOC1	0.356489
								P51805	PLXNA3	11		Q9P2K2	TXNDC16	0.356489
								Q15477	SKIC2	11		P20645	M6PR	0.356489
								Q92783	STAM	11		Q9Y2A9	B3GNT3	0.356418
								Q9P2K2	TXNDC16	11		Q99471	PFDN5	0.356347
								Q92520	FAM3C	11		Q5VZK9	CARMIL1	0.356347
								P61024	CKS1B	11		Q8NBJ7	SUMF2	0.356276
								Q86YM7	HOMER1	11		P13473	LAMP2	0.356064
								Q96PZ0	PUS7	11		P18084	ITGB5	0.355993
								P78536	ADAM17	11		P78346	RPP30	0.355993
								P17301	ITGA2	11		Q9NZ63	C9orf78	0.355851
								P08962	CD63	11		Q9UIA9	XPO7	0.355781
								Q5KU26	COLEC12	11		Q92520	FAM3C	0.355781
								Q9BZE9	ASPSCR1	11		P14324	FDPS	0.355569
								Q9BYG5	PARD6B	11		Q96FX7	TRMT61A	0.355498
								P06737	PYGL	11		Q32MZ4	LRRFIP1	0.355428
								P61020	RAB5B	11		Q69YN2	CWF19L1	0.355357
								Q9UPT5	EXOC7	11		Q01469	FABP5	0.355287
								P01130	LDLR	11		P17655	CAPN2	0.355075
								P48509	CD151	11		Q16401	PSMD5	0.354935
								P52799	EFNB2	11		O43768	ENSA	0.354864
								Q9NU53	GINM1	11		P30520	ADSS2	0.354864
								Q8NBK3	SUMF1	11		P62310	LSM3	0.354794
								P49915	GMPS	10		P61024	CKS1B	0.354583
								Q96C19	EFHD2	10		Q13444	ADAM15	0.354583
								Q96D46	NMD3	10		Q86YM7	HOMER1	0.354373
								P11233	RALA	10		Q92575	UBXN4	0.354373
								P22102	GART	10		Q13033	STRN3	0.354303
								Q8NE71	ABCF1	10		O75608	LYPLA1	0.354303
								P09543	CNP	10		O75351	VPS4B	0.354233
								Q12849	GRSF1	10		P01019	AGT	0.354163
								Q53SF7	COBLL1	10		Q9NWV8	BABAM1	0.354093
								Q8NBJ5	COLGALT1	10		Q9HAU5	UPF2	0.354093
								P23921	RRM1	10		Q8NBI6	XXYLT1	0.353533
								P22059	OSBP	10		Q96PZ0	PUS7	0.353464
								Q9NVA2	SEPTIN11	10		P78536	ADAM17	0.353464
								Q9BZZ5	API5	10		Q9Y5X3	SNX5	0.353394
								Q16775	HAGH	10		O75496	GMNN	0.353394
								P20340	RAB6A	10		Q68EM7	ARHGAP17	0.352906
								Q96AC1	FERMT2	10		O43657	TSPAN6	0.352767
								Q9UBE0	SAE1	10		P26374	CHML	0.352767
								Q04695	KRT17	10		Q96EE3	SEH1L	0.352767
								Q9UBV7	B4GALT7	10		Q96ME1	FBXL18	0.352698
								P04632	CAPNS1	10		Q12846	STX4	0.352351
								Q16698	DECR1	10		Q6UWY0	ARSK	0.352282
								P98160	HSPG2	10		Q92636	NSMAF	0.352143
								Q9BX40	LSM14B	10		Q13510	ASAH1	0.352143
								Q99614	TTC1	10		P17301	ITGA2	0.352074
								Q8NBJ7	SUMF2	10		P50552	VASP	0.352074
								Q01469	FABP5	10		Q15286	RAB35	0.352005
								O43768	ENSA	10		Q96DA0	ZG16B	0.351936
								Q15286	RAB35	10		P53041	PPP5C	0.351936
								Q9UJ70	NAGK	10		P18850	ATF6	0.351936
								Q13443	ADAM9	10		Q5H9R7	PPP6R3	0.351866
								Q13439	GOLGA4	10		Q658Y4	FAM91A1	0.35159
								P51693	APLP1	10		P02649	APOE	0.351452
								P35052	GPC1	10		P36639	NUDT1	0.351452
								O94880	PHF14	10		Q99828	CIB1	0.351452
								O95994	AGR2	10		P04080	CSTB	0.351452
								O60513	B4GALT4	10		Q96D71	REPS1	0.351314
								Q96LA8	PRMT6	10		Q5JSH3	WDR44	0.351039
								Q16625	OCLN	10		P61960	UFM1	0.350901
								O15031	PLXNB2	10		P08962	CD63	0.350901
								O15460	P4HA2	10		Q92876	KLK6	0.350833
								P48735	IDH2	10		P23458	JAK1	0.350695
								Q12929	EPS8	10		Q9UK59	DBR1	0.350489
								P54760	EPHB4	10		P53611	RABGGTB	0.350284
								Q9Y281	CFL2	10		Q5KU26	COLEC12	0.350284
								Q9GZT8	NIF3L1	10		P41208	CETN2	0.350215
								P61970	NUTF2	10		Q9UJ70	NAGK	0.35001
								Q9Y570	PPME1	10		Q9BZE9	ASPSCR1	0.349736
								P05362	ICAM1	10		P15586	GNS	0.349736
								Q9H9T3	ELP3	10		Q14139	UBE4A	0.3496
								Q8WV99	ZFAND2B	10		P61764	STXBP1	0.349532
								O75695	RP2	10		Q9UPU5	USP24	0.349532
								Q13564	NAE1	9		O75391	SPAG7	0.349327
								P09417	QDPR	9		Q96BW5	PTER	0.349259
								O00273	DFFA	9		P62328	TMSB4X	0.349123
								Q12768	WASHC5	9		Q9BYG5	PARD6B	0.349055
								Q9BQ52	ELAC2	9		P11766	ADH5	0.349055
								Q9BTE3	MCMBP	9		Q8N3U4	STAG2	0.348851
								O15541	RNF113A	9		Q92599	SEPTIN8	0.348851
								P07954	FH	9		O75116	ROCK2	0.348647
								Q96TA1	NIBAN2	9		Q15382	RHEB	0.348579
								Q5T0W9	FAM83B	9		Q9NXU5	ARL15	0.348579
								P16278	GLB1	9		O75347	TBCA	0.348579
								Q9P265	DIP2B	9		Q13232	NME3	0.348511
								P11216	PYGB	9		Q7Z4H8	POGLUT3	0.348511
								P61966	AP1S1	9		P50895	BCAM	0.348444
								Q9H773	DCTPP1	9		P49356	FNTB	0.348308
								Q9Y617	PSAT1	9		Q6UXH1	CRELD2	0.348308
								P14324	FDPS	9		Q9BV40	VAMP8	0.34824
								Q96FX7	TRMT61A	9		Q13443	ADAM9	0.34824
								Q32MZ4	LRRFIP1	9		Q13439	GOLGA4	0.348037
								Q92575	UBXN4	9		P54802	NAGLU	0.348037
								O75496	GMNN	9		Q99808	SLC29A1	0.348037
								P50552	VASP	9		Q96KG9	SCYL1	0.34797
								Q5H9R7	PPP6R3	9		Q9H2J4	PDCL3	0.347902
								Q658Y4	FAM91A1	9		Q9NXG2	THUMPD1	0.347902
								Q14139	UBE4A	9		P51693	APLP1	0.347835
								P61764	STXBP1	9		P35052	GPC1	0.347767
								P50895	BCAM	9		Q969H8	MYDGF	0.347699
								O94887	FARP2	9		P12081	HARS1	0.347699
								Q8NG11	TSPAN14	9		Q9NRW7	VPS45	0.347565
								O14907	TAX1BP3	9		Q14192	FHL2	0.347497
								Q66K74	MAP1S	9		P23443	RPS6KB1	0.347362
								Q7LBR1	CHMP1B	9		Q99747	NAPG	0.34716
								O15020	SPTBN2	9		Q9Y3A3	MOB4	0.347093
								O95376	ARIH2	9		P15289	ARSA	0.347093
								Q24JP5	TMEM132A	9		Q9Y6X4	FAM169A	0.347026
								Q9H9E3	COG4	9		Q92696	RABGGTA	0.346959
								Q96TA2	YME1L1	9		O15230	LAMA5	0.346959
								O60645	EXOC3	9		Q01581	HMGCS1	0.346959
								Q6AI08	HEATR6	9		P21579	SYT1	0.346824
								Q8N441	FGFRL1	9		Q9BVL2	NUP58	0.346757
								Q99715	COL12A1	9		P31949	S100A11	0.34669
								Q99439	CNN2	8		P20908	COL5A1	0.346556
								Q04760	GLO1	8		P62256	UBE2H	0.346556
								Q4KMP7	TBC1D10B	8		P14780	MMP9	0.346355
								P24666	ACP1	8		P23634	ATP2B4	0.346288
								O75487	GPC4	8		O60437	PPL	0.346154
								O75882	ATRN	8		P50591	TNFSF10	0.346087
								P54577	YARS1	8		P32456	GBP2	0.345886
								A0MZ66	SHTN1	8		P06737	PYGL	0.345886
								P06280	GLA	8		O94880	PHF14	0.34582
								O95685	PPP1R3D	8		Q15024	EXOSC7	0.345686
								Q13867	BLMH	8		Q9HAV0	GNB4	0.345619
								P78346	RPP30	8		P61020	RAB5B	0.345486
								Q13444	ADAM15	8		P36952	SERPINB5	0.345486
								Q8NBI6	XXYLT1	8		P49903	SEPHS1	0.345486
								Q6UWY0	ARSK	8		Q92626	PXDN	0.345419
								P36639	NUDT1	8		Q4LE39	ARID4B	0.345353
								Q5JSH3	WDR44	8		P48637	GSS	0.345353
								P15586	GNS	8		P54259	ATN1	0.344954
								P62328	TMSB4X	8		Q10471	GALNT2	0.344821
								P54802	NAGLU	8		O95994	AGR2	0.344821
								Q9NRW7	VPS45	8		Q6UWB1	IL27RA	0.344755
								P36952	SERPINB5	8		O94887	FARP2	0.344556
								Q92626	PXDN	8		Q9Y5S2	CDC42BPB	0.344357
								Q13214	SEMA3B	8		O60911	CTSV	0.344291
								Q01970	PLCB3	8		P14550	AKR1A1	0.344291
								Q8NFW8	CMAS	8		Q9H8M7	MINDY3	0.344291
								Q68CQ7	GLT8D1	8		Q9H8W4	PLEKHF2	0.34396
								Q8WX93	PALLD	8		P00738	HP	0.34396
								Q96K17	BTF3L4	8		Q8NG11	TSPAN14	0.343894
								P09958	FURIN	8		P30085	CMPK1	0.34363
								P48059	LIMS1	8		Q9UBX5	FBLN5	0.343498
								Q9NV96	TMEM30A	8		Q14696	MESD	0.343498
								P50452	SERPINB8	8		P33151	CDH5	0.343498
								Q99757	TXN2	8		Q13214	SEMA3B	0.343498
								Q9BYZ2	LDHAL6B	8		P23469	PTPRE	0.343367
								Q9GZL7	WDR12	8		O14907	TAX1BP3	0.343235
								O75581	LRP6	8		Q99829	CPNE1	0.343169
								Q9BWP8	COLEC11	8		Q8N392	ARHGAP18	0.343103
								Q96HD1	CRELD1	8		P49354	FNTA	0.343038
								Q96CS7	PLEKHB2	8		Q01970	PLCB3	0.343038
								Q9Y6Q5	AP1M2	8		Q66K74	MAP1S	0.342972
								Q08345	DDR1	8		O00461	GOLIM4	0.342906
								O43291	SPINT2	8		Q8NFW8	CMAS	0.342775
								P31937	HIBADH	8		Q92797	SYMPK	0.34271
								O00462	MANBA	8		P42892	ECE1	0.342578
								Q495W5	FUT11	8		Q9BXS4	TMEM59	0.342513
								P49862	KLK7	8		P48739	PITPNB	0.342513
								Q14802	FXYD3	8		O60513	B4GALT4	0.342447
								Q4J6C6	PREPL	8		Q93063	EXT2	0.342447
								Q86VP1	TAX1BP1	8		P49005	POLD2	0.342186
								Q11206	ST3GAL4	8		P55210	CASP7	0.342055
								Q9NTJ3	SMC4	7		Q9NXR7	BABAM2	0.341924
								Q9BTY2	FUCA2	7		Q9BXS6	NUSAP1	0.341794
								Q99536	VAT1	7		Q92979	EMG1	0.341794
								Q8IZA0	KIAA0319L	7		Q9UPT5	EXOC7	0.341729
								Q96MW1	CCDC43	7		P16144	ITGB4	0.341729
								Q52LJ0	FAM98B	7		P01130	LDLR	0.341403
								Q6UX04	CWC27	7		Q96LA8	PRMT6	0.341273
								P07602	PSAP	7		Q68CQ7	GLT8D1	0.341208
								P30566	ADSL	7		Q16625	OCLN	0.341013
								Q9NQX3	GPHN	7		O15031	PLXNB2	0.340883
								Q13112	CHAF1B	7		O00233	PSMD9	0.340818
								Q8IV08	PLD3	7		Q8WX93	PALLD	0.340171
								P13473	LAMP2	7		Q96K17	BTF3L4	0.339977
								Q9NZ63	C9orf78	7		P29122	PCSK6	0.339977
								O75351	VPS4B	7		Q06546	GABPA	0.339913
								P18850	ATF6	7		P12110	COL6A2	0.339913
								Q9UPU5	USP24	7		O43633	CHMP2A	0.339913
								O75347	TBCA	7		Q7LBR1	CHMP1B	0.339913
								Q99808	SLC29A1	7		P38571	LIPA	0.339848
								Q969H8	MYDGF	7		P09958	FURIN	0.339719
								Q9HAV0	GNB4	7		Q96ER3	SAAL1	0.33959
								Q4LE39	ARID4B	7		O15460	P4HA2	0.33959
								P14550	AKR1A1	7		P15121	AKR1B1	0.33959
								P23469	PTPRE	7		P05155	SERPING1	0.339526
								P55210	CASP7	7		P40123	CAP2	0.339462
								Q9NXR7	BABAM2	7		Q9H832	UBE2Z	0.339462
								Q9BXS6	NUSAP1	7		P48059	LIMS1	0.339205
								Q92979	EMG1	7		Q9Y289	SLC5A6	0.339205
								P16144	ITGB4	7		Q9BX67	JAM3	0.339205
								P29122	PCSK6	7		P48509	CD151	0.339012
								P40123	CAP2	7		Q9NV96	TMEM30A	0.338948
								Q9H832	UBE2Z	7		P48735	IDH2	0.338884
								Q9NT62	ATG3	7		Q12929	EPS8	0.338884
								Q5JS37	NHLRC3	7		O15020	SPTBN2	0.338884
								Q9ULC4	MCTS1	7		O95376	ARIH2	0.338627
								Q6IA86	ELP2	7		Q14019	COTL1	0.338563
								P17900	GM2A	7		Q9HB40	SCPEP1	0.338371
								O60502	OGA	7		P18858	LIG1	0.338244
								Q9P273	TENM3	7		Q9Y3D6	FIS1	0.337925
								P80303	NUCB2	7		P54760	EPHB4	0.337861
								Q9Y4D1	DAAM1	7		P50452	SERPINB8	0.337861
								O00391	QSOX1	7		P15529	CD46	0.337861
								Q9Y315	DERA	7		Q99757	TXN2	0.337797
								P21283	ATP6V1C1	7		P09486	SPARC	0.337733
								P50148	GNAQ	7		P11234	RALB	0.33767
								Q9UMY4	SNX12	7		Q9ULA0	DNPEP	0.33767
								P05121	SERPINE1	7		Q7Z7M0	MEGF8	0.337606
								Q9P0V9	SEPTIN10	7		Q9BYZ2	LDHAL6B	0.337479
								P13284	IFI30	7		Q9Y281	CFL2	0.337415
								P03952	KLKB1	7		Q9GZT8	NIF3L1	0.337415
								O43286	B4GALT5	7		Q9NT62	ATG3	0.337098
								Q9NZ53	PODXL2	7		Q8IVM0	CCDC50	0.337098
								P52803	EFNA5	7		O15162	PLSCR1	0.337034
								Q9BXX0	EMILIN2	7		Q5JS37	NHLRC3	0.336971
								Q99798	ACO2	6		O15496	PLA2G10	0.336907
								Q96J02	ITCH	6		Q9Y2B1	RXYLT1	0.336907
								Q9UGI8	TES	6		Q96JC1	VPS39	0.336844
								O95359	TACC2	6		P36871	PGM1	0.336781
								P35237	SERPINB6	6		Q8NCH0	CHST14	0.336717
								P40925	MDH1	6		P09758	TACSTD2	0.336654
								Q7L1Q6	BZW1	6		P48200	IREB2	0.336528
								P20645	M6PR	6		Q9ULJ7	ANKRD50	0.336338
								P30520	ADSS2	6		P61970	NUTF2	0.336023
								P01019	AGT	6		P55058	PLTP	0.336023
								Q68EM7	ARHGAP17	6		P29400	COL4A5	0.335833
								O75391	SPAG7	6		P55957	BID	0.335708
								O75116	ROCK2	6		Q9ULC4	MCTS1	0.335645
								P23443	RPS6KB1	6		P60903	S100A10	0.335582
								Q01581	HMGCS1	6		Q6IA86	ELP2	0.335456
								O60437	PPL	6		O14530	TXNDC9	0.335268
								Q9Y5S2	CDC42BPB	6		P17900	GM2A	0.335205
								Q9H8M7	MINDY3	6		Q92743	HTRA1	0.335205
								Q93063	EXT2	6		Q5T5P2	KIAA1217	0.335205
								P49005	POLD2	6		Q9H8J5	MANSC1	0.335017
								Q9HB40	SCPEP1	6		P25391	LAMA1	0.334954
								Q9ULA0	DNPEP	6		P15309	ACP3	0.334892
								Q7Z7M0	MEGF8	6		Q9GZL7	WDR12	0.334829
								Q96JC1	VPS39	6		O75581	LRP6	0.334829
								Q8NCH0	CHST14	6		Q6YP21	KYAT3	0.334829
								P48200	IREB2	6		O60502	OGA	0.334641
								P29400	COL4A5	6		Q9P273	TENM3	0.334267
								P55957	BID	6		Q9Y219	JAG2	0.334267
								P60903	S100A10	6		Q24JP5	TMEM132A	0.334079
								Q92743	HTRA1	6		Q9BWP8	COLEC11	0.334079
								P25391	LAMA1	6		Q08431	MFGE8	0.334079
								P15309	ACP3	6		O94804	STK10	0.334079
								Q02818	NUCB1	6		Q02818	NUCB1	0.333706
								Q5TZA2	CROCC	6		P35556	FBN2	0.333582
								Q96CN7	ISOC1	6		P28062	PSMB8	0.333457
								P23470	PTPRG	6		Q9BW83	IFT27	0.333395
								Q92729	PTPRU	6		Q92485	SMPDL3B	0.333395
								P08134	RHOC	6		Q9UJJ9	GNPTG	0.333271
								Q8NB37	GATD1	6		Q9H9E3	COG4	0.333147
								P22307	SCP2	6		Q676U5	ATG16L1	0.332591
								P36896	ACVR1B	6		O75354	ENTPD6	0.332529
								Q9Y2B0	CNPY2	6		P52799	EFNB2	0.332467
								Q15274	QPRT	6		Q5TZA2	CROCC	0.332405
								Q8IZ83	ALDH16A1	6		Q13361	MFAP5	0.332282
								Q14746	COG2	6		Q96CN7	ISOC1	0.33222
								Q9BQT9	CLSTN3	6		Q9Y570	PPME1	0.332097
								Q5VSG8	MANEAL	6		Q9BWS9	CHID1	0.331913
								Q8WW59	SPRYD4	6		P80303	NUCB2	0.331544
								Q5MNZ6	WDR45B	6		A6NDB9	PALM3	0.331483
								P35475	IDUA	6		P62253	UBE2G1	0.331176
								Q99674	CGREF1	6		Q8WWI5	SLC44A1	0.331115
								O43529	CHST10	6		P23470	PTPRG	0.331054
								Q15113	PCOLCE	6		Q00169	PITPNA	0.331054
								Q9NX46	ADPRS	5		P05362	ICAM1	0.330748
								Q9NZM1	MYOF	5		Q96HD1	CRELD1	0.330626
								Q9UKY7	CDV3	5		P55145	MANF	0.330626
								Q15833	STXBP2	5		O95861	BPNT1	0.330504
								P55786	NPEPPS	5		Q9UKU6	TRHDE	0.330382
								Q9HB07	MYG1	5		Q8NC67	NETO2	0.330382
								Q5VZK9	CARMIL1	5		Q9Y547	IFT25	0.330199
								Q96ME1	FBXL18	5		Q96CS7	PLEKHB2	0.330077
								Q13510	ASAH1	5		Q96TA2	YME1L1	0.330017
								Q99828	CIB1	5		O95297	MPZL1	0.330017
								P04080	CSTB	5		Q9Y4D1	DAAM1	0.329895
								Q9UK59	DBR1	5		Q96S86	HAPLN3	0.329834
								P11766	ADH5	5		O00391	QSOX1	0.329591
								Q9NXG2	THUMPD1	5		Q92729	PTPRU	0.329591
								P31949	S100A11	5		O96014	WNT11	0.329531
								P62256	UBE2H	5		P08134	RHOC	0.329288
								P30085	CMPK1	5		Q9Y315	DERA	0.328926
								P48739	PITPNB	5		P21283	ATP6V1C1	0.328926
								P38571	LIPA	5		P50148	GNAQ	0.328926
								P15121	AKR1B1	5		Q9H013	ADAM19	0.328926
								P05155	SERPING1	5		Q8NHP8	PLBD2	0.328926
								P15529	CD46	5		Q9NS15	LTBP3	0.328805
								Q8IVM0	CCDC50	5		Q9UMY4	SNX12	0.328744
								Q08431	MFGE8	5		Q9Y6Q5	AP1M2	0.328684
								P35556	FBN2	5		Q9H6S3	EPS8L2	0.328684
								Q9UJJ9	GNPTG	5		Q9H9T3	ELP3	0.328624
								P55145	MANF	5		Q96S97	MYADM	0.328503
								Q9H013	ADAM19	5		Q96C86	DCPS	0.328443
								Q9NS15	LTBP3	5		Q08345	DDR1	0.328202
								Q9H6S3	EPS8L2	5		Q15172	PPP2R5A	0.328022
								Q15172	PPP2R5A	5		Q15059	BRD3	0.327722
								Q15059	BRD3	5		P36941	LTBR	0.327722
								Q9NUW8	TDP1	5		O43291	SPINT2	0.327602
								P82094	TMF1	5		Q08397	LOXL1	0.327243
								O00423	EML1	5		Q6PL24	TMED8	0.327243
								Q5TH69	ARFGEF3	5		Q4KMQ2	ANO6	0.327123
								O00193	SMAP	5		Q16706	MAN2A1	0.327123
								O75110	ATP9A	5		P61225	RAP2B	0.326944
								Q07812	BAX	5		Q8NB37	GATD1	0.326884
								Q9Y624	F11R	5		P05121	SERPINE1	0.326765
								O75051	PLXNA2	5		P22307	SCP2	0.326706
								Q9NQ84	GPRC5C	5		Q9NUW8	TDP1	0.326706
								O75818	RPP40	5		P36896	ACVR1B	0.326646
								Q9NTJ4	MAN2C1	5		P82094	TMF1	0.326348
								Q9NS86	LANCL2	5		O00423	EML1	0.326348
								Q9UN70	PCDHGC3	5		O60645	EXOC3	0.32623
								P15374	UCHL3	4		O60218	AKR1B10	0.32617
								P30740	SERPINB1	4		O43157	PLXNB1	0.325814
								Q96BW5	PTER	4		Q9P0V9	SEPTIN10	0.325518
								Q7Z4H8	POGLUT3	4		P13284	IFI30	0.325341
								Q9Y6X4	FAM169A	4		A1X283	SH3PXD2B	0.325222
								P49903	SEPHS1	4		P31937	HIBADH	0.324927
								P48637	GSS	4		O00462	MANBA	0.32481
								P42892	ECE1	4		Q6AI08	HEATR6	0.324633
								Q9Y289	SLC5A6	4		Q9C0B1	FTO	0.324515
								P09486	SPARC	4		Q8WV99	ZFAND2B	0.324339
								Q9Y2B1	RXYLT1	4		Q5TH69	ARFGEF3	0.324339
								P55058	PLTP	4		Q9NQW7	XPNPEP1	0.324163
								Q5T5P2	KIAA1217	4		Q8N441	FGFRL1	0.324104
								Q9Y219	JAG2	4		Q495W5	FUT11	0.324104
								Q9BWS9	CHID1	4		Q96G03	PGM2	0.324104
								A6NDB9	PALM3	4		Q9Y2B0	CNPY2	0.324046
								Q8WWI5	SLC44A1	4		P49862	KLK7	0.32346
								Q00169	PITPNA	4		O00193	SMAP	0.323344
								O95861	BPNT1	4		Q14802	FXYD3	0.323285
								Q9Y547	IFT25	4		P61916	NPC2	0.322703
								O96014	WNT11	4		Q4J6C6	PREPL	0.322645
								Q8NHP8	PLBD2	4		O75695	RP2	0.322528
								Q96S97	MYADM	4		Q9H2H8	PPIL3	0.322412
								P36941	LTBR	4		Q9BRX5	GINS3	0.322354
								Q08397	LOXL1	4		Q9UN36	NDRG2	0.322006
								O43157	PLXNB1	4		P54687	BCAT1	0.321659
								Q9C0B1	FTO	4		O75110	ATP9A	0.321544
								P61916	NPC2	4		Q9H5V8	CDCP1	0.321256
								Q9BRX5	GINS3	4		Q07812	BAX	0.320795
								P54687	BCAT1	4		Q9BRR6	ADPGK	0.32068
								Q9H5V8	CDCP1	4		Q15274	QPRT	0.320222
								Q9UL26	RAB22A	4		O94766	B3GAT3	0.319251
								O60259	KLK8	4		P12955	PEPD	0.319251
								Q10472	GALNT1	4		P03952	KLKB1	0.319194
								Q8NBS9	TXNDC5	4		Q86VP1	TAX1BP1	0.31891
								Q15223	NECTIN1	4		Q9Y624	F11R	0.31891
								Q8IV36	HID1	4		Q9NU53	GINM1	0.318174
								Q8NEX9	SDR9C7	4		O75051	PLXNA2	0.317497
								P32455	GBP1	4		Q9UL26	RAB22A	0.317328
								P05062	ALDOB	4		P29083	GTF2E1	0.316655
								Q9C075	KRT23	4		O60259	KLK8	0.315873
								Q07092	COL16A1	4		Q10472	GALNT1	0.315539
								O75503	CLN5	4		O43286	B4GALT5	0.315484
								Q03167	TGFBR3	4		Q8IZ83	ALDH16A1	0.315372
								Q9Y3C8	UFC1	4		Q14746	COG2	0.314818
								Q9NTM9	CUTC	4		Q8NBS9	TXNDC5	0.314597
								Q08623	PUDP	4		Q9NQ84	GPRC5C	0.314431
								O75063	FAM20B	4		O75818	RPP40	0.31399
								P26572	MGAT1	4		Q15223	NECTIN1	0.313825
								P34949	MPI	4		Q9NZ53	PODXL2	0.313605
								Q9BZM4	ULBP3	4		Q9NTJ4	MAN2C1	0.31355
								O60243	HS6ST1	4		Q96EI5	TCEAL4	0.31355
								O75608	LYPLA1	3		Q8NBK3	SUMF1	0.313496
								P50591	TNFSF10	3		P04424	ASL	0.312675
								Q9BX67	JAM3	3		Q9NS86	LANCL2	0.312565
								Q14019	COTL1	3		Q8IV36	HID1	0.312293
								P36871	PGM1	3		Q14CX7	NAA25	0.312075
								Q6YP21	KYAT3	3		Q9NZ08	ERAP1	0.311967
								Q92485	SMPDL3B	3		P52803	EFNA5	0.311478
								O75354	ENTPD6	3		O14618	CCS	0.310937
								Q9UKU6	TRHDE	3		O75223	GGCT	0.310345
								O95297	MPZL1	3		Q8NEX9	SDR9C7	0.309969
								Q96C86	DCPS	3		P20962	PTMS	0.309915
								O60218	AKR1B10	3		Q9BXX0	EMILIN2	0.309701
								A1X283	SH3PXD2B	3		Q99715	COL12A1	0.308368
								Q9NQW7	XPNPEP1	3		Q9BQT9	CLSTN3	0.307891
								Q9H2H8	PPIL3	3		P32455	GBP1	0.307573
								Q9UN36	NDRG2	3		Q5VSG8	MANEAL	0.307521
								P29083	GTF2E1	3		P05062	ALDOB	0.307362
								Q96EI5	TCEAL4	3		Q8WW59	SPRYD4	0.306678
								Q14CX7	NAA25	3		Q9C075	KRT23	0.306102
								Q9NZ08	ERAP1	3		Q07092	COL16A1	0.30584
								O14618	CCS	3		Q9H2U2	PPA2	0.305267
								O75223	GGCT	3		P48147	PREP	0.304644
								P48147	PREP	3		Q9UN70	PCDHGC3	0.304488
								P19883	FST	3		Q5MNZ6	WDR45B	0.304178
								P52758	RIDA	3		P19883	FST	0.304126
								P07738	BPGM	3		O75503	CLN5	0.303662
								P51511	MMP15	3		P35475	IDUA	0.303302
								Q9UMD9	COL17A1	3		P35548	MSX2	0.302943
								O43278	SPINT1	3		P52758	RIDA	0.302432
								P06865	HEXA	3		Q99674	CGREF1	0.302176
								P08174	CD55	3		Q8N8Z6	DCBLD1	0.301922
								O00244	ATOX1	3		P55263	ADK	0.301464
								P43251	BTD	3		Q9H0R4	HDHD2	0.300655
								P26885	FKBP2	3		Q9NUY8	TBC1D23	0.29995
								P15291	B4GALT1	3		P07738	BPGM	0.299749
								Q10469	MGAT2	3		O43529	CHST10	0.299599
								Q6P587	FAHD1	3		Q03167	TGFBR3	0.298053
								Q9H1B5	XYLT2	3		Q9Y3C8	UFC1	0.298053
								Q9GZX9	TWSG1	3		Q9NTM9	CUTC	0.29736
								Q9HAB8	PPCS	3		Q9H477	RBKS	0.297163
								O94910	ADGRL1	3		P51511	MMP15	0.296376
								Q96FV2	SCRN2	3		Q9UMD9	COL17A1	0.296327
								P12081	HARS1	2		Q08623	PUDP	0.295935
								Q99829	CPNE1	2		O43278	SPINT1	0.295935
								P18858	LIG1	2		P06865	HEXA	0.29535
								O94804	STK10	2		Q11206	ST3GAL4	0.295204
								P62253	UBE2G1	2		P08174	CD55	0.295204
								Q8NC67	NETO2	2		Q9UMR5	PPT2	0.295058
								Q96S86	HAPLN3	2		Q01459	CTBS	0.295058
								Q6PL24	TMED8	2		O00244	ATOX1	0.294912
								P61225	RAP2B	2		P43251	BTD	0.294863
								Q96G03	PGM2	2		Q15113	PCOLCE	0.291836
								P12955	PEPD	2		Q92484	SMPDL3A	0.291836
								P04424	ASL	2		P26885	FKBP2	0.291599
								P20962	PTMS	2		O75063	FAM20B	0.290794
								Q9H2U2	PPA2	2		P15291	B4GALT1	0.289011
								P35548	MSX2	2		Q9HAT2	SIAE	0.287896
								Q8N8Z6	DCBLD1	2		P26572	MGAT1	0.286881
								P55263	ADK	2		Q9P1F3	ABRACL	0.286468
								Q9H0R4	HDHD2	2		P34949	MPI	0.285874
								Q9NUY8	TBC1D23	2		Q10469	MGAT2	0.285874
								Q9H477	RBKS	2		P16860	NPPB	0.285737
								Q9UMR5	PPT2	2		Q86YD5	LDLRAD3	0.285055
								Q01459	CTBS	2		P06681	C2	0.281914
								Q92484	SMPDL3A	2		P22033	MMUT	0.279102
								Q9HAT2	SIAE	2		Q9BYT8	NLN	0.278581
								P16860	NPPB	2		Q6P587	FAHD1	0.278408
								P06681	C2	2		Q9H1B5	XYLT2	0.276261
								P22033	MMUT	2		Q9GZX9	TWSG1	0.274651
								Q9BYT8	NLN	2		Q9BZM4	ULBP3	0.274567
								P07205	PGK2	2		P07205	PGK2	0.274231
								Q92859	NEO1	2		O60243	HS6ST1	0.273853
								P98095	FBLN2	2		Q9HAB8	PPCS	0.27252
								P27707	DCK	2		Q99542	MMP19	0.271158
								Q9UJ68	MSRA	2		Q8TCD5	NT5C	0.271035
								Q4KMQ2	ANO6	1		O94910	ADGRL1	0.270953
								Q16706	MAN2A1	1		Q9BXI9	C1QTNF6	0.269607
								Q9P1F3	ABRACL	1		Q92859	NEO1	0.268395
								Q86YD5	LDLRAD3	1		P98095	FBLN2	0.267633
								Q99542	MMP19	1		Q8WXI7	MUC16	0.267154
								Q8TCD5	NT5C	1		Q9H7P6	MVB12B	0.265688
								Q9BXI9	C1QTNF6	1		P27707	DCK	0.26346
								Q8WXI7	MUC16	1		Q9UJ68	MSRA	0.261384
								Q9H7P6	MVB12B	1		Q96FV2	SCRN2	0.260358
								Q53FA7	TP53I3	1		Q53FA7	TP53I3	0.255638
								P52797	EFNA3	1		P52797	EFNA3	0.252752
								Q49AR2	C5orf22	1		Q49AR2	C5orf22	0.205225

## Sheet: Supplementary Table4 BeWODown
From the dynamic PABC media vs. Static BeWo conditioned culture Network made from DOWNREGULATED DEPs and nonDEPs								From the dynamic PABC media vs. Static BeWo conditioned culture Netwok made from DOWNREGULATED DEP and nonDEPs
DEPs ranked by Degree (Top )				DEPs ranked by Closeness Centrality				nonDEPs ranked by Degree (Top )				nonDEPs ranked by Closeness Centrality				Network Visualization									Network Quick Facts
Uniprot ID	Name	Degree		Uniprot ID	Name	Closeness Centrality		Uniprot ID	Name	Degree		Uniprot ID	Name	Closeness Centrality		NOTE: A Degree-sorted circle layout has been applied to the 20 highest Degree proteins									2135	The total number of nodes (DEPs and nonDEPs) in the main connected component
P47756	CAPZB	406		P47756	CAPZB	0.513969		P61981	YWHAG	496		P61981	YWHAG	0.536316		All other proteins and the edges between them have been set to a low opacity									35678	The total number of edges in the main connected component
Q9Y3A5	SBDS	374		Q9Y3A5	SBDS	0.506888		Q13618	CUL3	484		Q13618	CUL3	0.531375		NOTE: the colouring of the nodes is based on Degree.									36.19	The average Degree of DEPs in the main connected component
P06748	NPM1	346		P62993	GRB2	0.498482		Q9NR30	DDX21	390		Q9NR30	DDX21	0.506287		Higher Degree nodes are darker blue, and lower Degree nodes are lighter blue									32.19	The average Degree of nonDEPs in the main connected component
O75940	SMNDC1	328		O75940	SMNDC1	0.494096		O75152	ZC3H11A	346		P63104	YWHAZ	0.498365
Q6ZN17	LIN28B	324		P07910	HNRNPC	0.493981		Q92905	COPS5	312		O75152	ZC3H11A	0.496395
Q99459	CDC5L	317		Q99459	CDC5L	0.493639		Q12906	ILF3	304		Q92905	COPS5	0.494439											DEPs not in the main connected component include:
P07910	HNRNPC	308		P06748	NPM1	0.492727		Q86VP6	CAND1	302		Q86VP6	CAND1	0.491479											(MGAT3, A4GALT, SEMA3A, PRSS27, CLDN6, NT5DC1, STC1, IGSF9, MFAP2, COX16, CFD, ADAMTS19, MXRA8, COL26A1, FDX1)
Q8WUA2	PPIL4	288		Q6ZN17	LIN28B	0.488106		Q16629	SRSF7	293		P02751	FN1	0.489113
P62993	GRB2	276		Q8WUA2	PPIL4	0.487215		Q15427	SF3B4	278		Q12906	ILF3	0.48833
Q9H9Z2	LIN28A	271		P09651	HNRNPA1	0.478154		Q9C0B5	ZDHHC5	270		Q16629	SRSF7	0.48434
O95218	ZRANB2	236		O95218	ZRANB2	0.47077		P23396	RPS3	264		Q9C0B5	ZDHHC5	0.483681											Results
P09651	HNRNPA1	223		Q9H9Z2	LIN28A	0.468599		Q13616	CUL1	264		P23396	RPS3	0.483462											These DEPs are both in the list of the top 20 highest Degree and top 20 highest closeness centrality lists:
Q07955	SRSF1	210		Q09161	NCBP1	0.467777		Q4G0J3	LARP7	263		Q13363	CTBP1	0.482696											(CAPZB, CDC5L, FUS, GRB2, HNRNPA1, HNRNPC, LIN28A, LIN28B, NCBP1, NPM1, PPIL4, SBDS, SMNDC1, SRSF1)
Q16630	CPSF6	196		P11142	HSPA8	0.465329		P63104	YWHAZ	262		Q15427	SF3B4	0.482478
Q8WXF1	PSPC1	193		Q07955	SRSF1	0.464014		P02751	FN1	261		P11021	HSPA5	0.481064											These nonDEPs are both in the list of the top 20 highest Degree and top 20 highest closeness centrality lists:
Q09161	NCBP1	187		P35637	FUS	0.463913		P62280	RPS11	244		Q4G0J3	LARP7	0.480414											(CAND1, COPS5, CTBP1, CUL1, CUL3, DDX21, DLD, FN1, ILF3, LARP7, RBM15, RPS11, RPS3, SF3B4, SRSF7, YWHAG, YWHAZ, ZC3H11A, ZDHHC5)
P35637	FUS	187		P12956	XRCC6	0.462806		Q96T37	RBM15	230		Q13616	CUL1	0.479982
Q9Y5S9	RBM8A	179		P05067	APP	0.462305		P09622	DLD	212		P62280	RPS11	0.474222
Q14498	RBM39	173		Q13283	G3BP1	0.460708		Q13363	CTBP1	211		Q96T37	RBM15	0.474117
P26368	U2AF2	169		P01116	KRAS	0.459815		Q08945	SSRP1	208		P09622	DLD	0.473696
Q13283	G3BP1	165		P67809	YBX1	0.459617		Q92804	TAF15	192		Q96FW1	OTUB1	0.471186
P63244	RACK1	164		Q08J23	NSUN2	0.457645		Q96FW1	OTUB1	190		Q15233	NONO	0.466652
P09234	SNRPC	162		P22626	HNRNPA2B1	0.457645		O96013	PAK4	181		P19784	CSNK2A2	0.466346
P46013	MKI67	158		Q16630	CPSF6	0.457449		Q53F19	NCBP3	181		Q04917	YWHAH	0.465735
P01116	KRAS	154		P12004	PCNA	0.456178		P46777	RPL5	179		Q08945	SSRP1	0.465228
P67809	YBX1	153		P26368	U2AF2	0.455205		Q93034	CUL5	177		O96013	PAK4	0.465126
P11362	FGFR1	151		P46013	MKI67	0.455108		P04156	PRNP	175		P31946	YWHAB	0.463812
Q13620	CUL4B	147		Q16543	CDC37	0.455108		P09012	SNRPA	174		Q92804	TAF15	0.462205
P11142	HSPA8	142		Q8WXF1	PSPC1	0.453946		O75821	EIF3G	169		P62258	YWHAE	0.462005
Q15459	SF3A1	137		P63244	RACK1	0.453946		Q9UN86	G3BP2	168		P46777	RPL5	0.460708
P09429	HMGB1	136		Q08211	DHX9	0.453079		P19784	CSNK2A2	167		O75821	EIF3G	0.458727
O75533	SF3B1	135		P09429	HMGB1	0.452886		Q15233	NONO	164		Q00839	HNRNPU	0.458235
P84098	RPL19	131		Q13620	CUL4B	0.450401		Q00839	HNRNPU	163		Q53F19	NCBP3	0.45794
O76094	SRP72	127		P19338	NCL	0.450306		P49458	SRP9	161		Q93034	CUL5	0.457645
Q15287	RNPS1	126		O75533	SF3B1	0.450211		Q06787	FMR1	159		Q06787	FMR1	0.457645
P12004	PCNA	122		Q14498	RBM39	0.449737		P36578	RPL4	159		Q13619	CUL4A	0.457253
P05455	SSB	121		Q8NC51	SERBP1	0.448885		Q04917	YWHAH	157		Q15691	MAPRE1	0.457155
P12956	XRCC6	119		Q15287	RNPS1	0.448225		Q86VM9	ZC3H18	157		Q99714	HSD17B10	0.455496
Q08211	DHX9	118		P07437	TUBB	0.447661		P62753	RPS6	153		P04156	PRNP	0.454817
P22455	FGFR4	116		P05455	SSB	0.446444		P00441	SOD1	148		Q14974	KPNB1	0.452982
Q08J23	NSUN2	115		P09234	SNRPC	0.446163		O43493	TGOLN2	147		O00429	DNM1L	0.45164
P42766	RPL35	113		P11940	PABPC1	0.445047		P11021	HSPA5	146		P38919	EIF4A3	0.451449
Q9UL18	AGO1	108		Q9Y5S9	RBM8A	0.444676		P27635	RPL10	146		P02545	LMNA	0.450877
P05067	APP	107		Q14247	CTTN	0.444398		P31946	YWHAB	142		P07900	HSP90AA1	0.450686
Q8NC51	SERBP1	107		O60506	SYNCRIP	0.444213		P62913	RPL11	142		P35579	MYH9	0.450591
P22626	HNRNPA2B1	104		Q15459	SF3A1	0.444028		Q13595	TRA2A	141		Q96SB4	SRPK1	0.450211
P40429	RPL13A	101		P43243	MATR3	0.443751		P62258	YWHAE	138		Q9Y230	RUVBL2	0.449926
O60506	SYNCRIP	97		P04406	GAPDH	0.443751		P62306	SNRPF	138		P51114	FXR1	0.449642
P08579	SNRPB2	94		P36507	MAP2K2	0.44329		Q9UHB9	SRP68	136		P36578	RPL4	0.449263
Q13243	SRSF5	93		Q96PK6	RBM14	0.443106		Q15691	MAPRE1	134		P21796	VDAC1	0.449263
Q96PK6	RBM14	92		P62316	SNRPD2	0.443106		P38919	EIF4A3	133		P04626	ERBB2	0.449074
P35916	FLT4	92		P51991	HNRNPA3	0.44228		P04626	ERBB2	132		P62913	RPL11	0.44898
P19338	NCL	91		P61978	HNRNPK	0.442188		Q96SB4	SRPK1	130		P09012	SNRPA	0.448319
Q92900	UPF1	91		P17844	DDX5	0.441913		O00429	DNM1L	126		Q9UN86	G3BP2	0.447473
P83105	HTRA4	90		P84098	RPL19	0.441183		Q15003	NCAPH	126		Q86VM9	ZC3H18	0.447286
Q15637	SF1	89		Q9UL18	AGO1	0.441		P02545	LMNA	125		P49458	SRP9	0.446911
P14866	HNRNPL	89		Q92945	KHSRP	0.440272		Q13247	SRSF6	125		P62753	RPS6	0.446911
P62316	SNRPD2	89		P42766	RPL35	0.440182		Q9Y295	DRG1	125		Q13595	TRA2A	0.446724
Q16543	CDC37	88		Q13263	TRIM28	0.439909		Q13619	CUL4A	124		P67870	CSNK2B	0.44663
Q6PKG0	LARP1	88		Q6PKG0	LARP1	0.439275		Q14444	CAPRIN1	123		P14625	HSP90B1	0.44607
Q9UQ80	PA2G4	88		P31040	SDHA	0.438914		P05388	RPLP0	121		Q9P0L0	VAPA	0.445233
P31040	SDHA	87		P11362	FGFR1	0.438824		P67870	CSNK2B	118		Q9Y2W1	THRAP3	0.444861
P43243	MATR3	85		Q92900	UPF1	0.438373		Q99714	HSD17B10	116		P09874	PARP1	0.444676
P36507	MAP2K2	83		Q7KZF4	SND1	0.438103		P21796	VDAC1	115		P00441	SOD1	0.444306
Q14103	HNRNPD	81		Q01844	EWSR1	0.438013		P39019	RPS19	114		P27635	RPL10	0.444121
P11940	PABPC1	81		P16401	H1-5	0.437744		Q9UKV8	AGO2	113		Q13435	SF3B2	0.444121
P09382	LGALS1	80		P35268	RPL22	0.437295		Q15428	SF3A2	113		P62241	RPS8	0.444028
P84103	SRSF3	80		P52597	HNRNPF	0.437116		P50579	METAP2	113		P62906	RPL10A	0.443936
Q9BXP5	SRRT	80		Q99873	PRMT1	0.436937		P62241	RPS8	112		Q9NYF8	BCLAF1	0.443659
Q9HCN8	SDF2L1	79		P40429	RPL13A	0.436669		P62424	RPL7A	112		P62899	RPL31	0.443383
Q9Y5Y6	ST14	79		P84103	SRSF3	0.436401		Q15054	POLD3	111		P78527	PRKDC	0.443198
P61978	HNRNPK	79		P62937	PPIA	0.436312		P08069	IGF1R	109		P05387	RPLP2	0.443106
P17844	DDX5	78		Q9BXP5	SRRT	0.436044		P15880	RPS2	108		P05388	RPLP0	0.442922
O15042	U2SURP	78		O43390	HNRNPR	0.436044		P22607	FGFR3	107		P18077	RPL35A	0.442922
P16401	H1-5	78		P60953	CDC42	0.435866		P26373	RPL13	107		Q14008	CKAP5	0.442647
Q14247	CTTN	77		Q9Y383	LUC7L2	0.435688		Q12888	TP53BP1	105		P62750	RPL23A	0.442555
P36873	PPP1CC	77		O14979	HNRNPDL	0.435333		P51114	FXR1	104		Q16643	DBN1	0.442555
P62910	RPL32	75		P36873	PPP1CC	0.435066		P20339	RAB5A	104		P08069	IGF1R	0.442005
Q9NZI8	IGF2BP1	74		Q13838	DDX39B	0.435066		Q9Y3U8	RPL36	104		Q07021	C1QBP	0.441913
P26583	HMGB2	74		P63000	RAC1	0.435066		P62750	RPL23A	103		O75643	SNRNP200	0.441822
P08621	SNRNP70	73		P14866	HNRNPL	0.434712		P09874	PARP1	102		P62306	SNRPF	0.44173
P62304	SNRPE	72		P62318	SNRPD3	0.433916		Q96GG9	DCUN1D1	101		Q9UKV8	AGO2	0.44173
P62633	CNBP	71		P27816	MAP4	0.433828		Q13418	ILK	101		P15880	RPS2	0.441274
O43390	HNRNPR	70		P22455	FGFR4	0.43374		P15170	GSPT1	101		Q12905	ILF2	0.441274
Q9UHB6	LIMA1	70		O15042	U2SURP	0.433299		Q7L5N1	COPS6	100		P61160	ACTR2	0.441
P10321	HLA-C	70		P31948	STIP1	0.433212		P41091	EIF2S3	100		Q9Y5B9	SUPT16H	0.441
P55010	EIF5	69		Q14103	HNRNPD	0.432948		P62899	RPL31	97		P39019	RPS19	0.440909
Q01844	EWSR1	68		P46109	CRKL	0.432597		Q13435	SF3B2	96		P06493	CDK1	0.440909
P03950	ANG	68		P55795	HNRNPH2	0.432509		Q12905	ILF2	94		P22607	FGFR3	0.440727
P35268	RPL22	68		P52907	CAPZA1	0.432159		P55884	EIF3B	94		P48634	PRRC2A	0.440363
O95400	CD2BP2	68		O76094	SRP72	0.431896		Q14974	KPNB1	93		Q15054	POLD3	0.440272
P04406	GAPDH	67		Q9NZI8	IGF2BP1	0.431722		P49407	ARRB1	93		Q15393	SF3B3	0.440272
Q05682	CALD1	66		Q13151	HNRNPA0	0.43146		P62917	RPL8	93		P20339	RAB5A	0.440091
Q13838	DDX39B	65		Q9Y3I0	RTCB	0.431198		P18621	RPL17	93		Q14204	DYNC1H1	0.44
P51991	HNRNPA3	65		Q9UQ80	PA2G4	0.429982		Q07020	RPL18	92		P35606	COPB2	0.439819
O14979	HNRNPDL	65		P49792	RANBP2	0.429982		P18077	RPL35A	91		P49407	ARRB1	0.439728
O75607	NPM3	64		P49327	FASN	0.429982		P13693	TPT1	91		Q9UHB9	SRP68	0.439547
P62318	SNRPD3	64		P62910	RPL32	0.429895		Q13523	PRP4K	90		P61289	PSME3	0.439456
P38159	RBMX	64		P13010	XRCC5	0.429549		P62906	RPL10A	89		Q09028	RBBP4	0.439366
P54652	HSPA2	63		Q8N163	CCAR2	0.429463		Q01081	U2AF1	89		P50454	SERPINH1	0.439185
P07437	TUBB	63		Q15717	ELAVL1	0.429376		P61247	RPS3A	89		P39023	RPL3	0.439095
P60953	CDC42	62		Q15637	SF1	0.429117		Q7Z2W4	ZC3HAV1	88		Q92734	TFG	0.439095
P63000	RAC1	62		P23528	CFL1	0.428945		P07900	HSP90AA1	87		Q13247	SRSF6	0.439004
Q8WVK2	SNRNP27	61		Q9UHB6	LIMA1	0.428686		Q9BQG0	MYBBP1A	87		Q99832	CCT7	0.438824
Q15185	PTGES3	60		P62861	FAU	0.428514		P62888	RPL30	87		Q04837	SSBP1	0.438824
O00422	SAP18	60		P08621	SNRNP70	0.428342		O76021	RSL1D1	87		P61353	RPL27	0.438734
Q13151	HNRNPA0	58		P38159	RBMX	0.428342		P35579	MYH9	86		Q14444	CAPRIN1	0.438643
Q9NWB6	ARGLU1	58		O95819	MAP4K4	0.428256		Q15375	EPHA7	85		P78371	CCT2	0.438553
P49792	RANBP2	58		P38646	HSPA9	0.427398		Q9Y2W1	THRAP3	84		Q9Y3U8	RPL36	0.438193
P17096	HMGA1	57		P31942	HNRNPH3	0.427227		Q9Y230	RUVBL2	81		Q7L5N1	COPS6	0.438193
O15355	PPM1G	57		P33991	MCM4	0.427142		P05387	RPLP2	81		P28482	MAPK1	0.438103
P23246	SFPQ	57		P23246	SFPQ	0.426885		P78371	CCT2	81		Q7Z2W4	ZC3HAV1	0.438013
P62826	RAN	57		Q13310	PABPC4	0.426885		P11171	EPB41	81		P11171	EPB41	0.438013
O76024	WFS1	57		P48729	CSNK1A1	0.426715		P62140	PPP1CB	81		P60866	RPS20	0.437833
Q15717	ELAVL1	57		O15355	PPM1G	0.426544		P31943	HNRNPH1	81		P35222	CTNNB1	0.437744
P84090	ERH	56		O95400	CD2BP2	0.426203		Q14980	NUMA1	81		Q13200	PSMD2	0.437116
Q7KZF4	SND1	55		Q13243	SRSF5	0.426118		Q07021	C1QBP	80		Q96GG9	DCUN1D1	0.437026
Q13263	TRIM28	54		P84090	ERH	0.425863		Q15393	SF3B3	80		P62140	PPP1CB	0.437026
Q96DI7	SNRNP40	53		P62304	SNRPE	0.425608		P61513	RPL37A	80		P46782	RPS5	0.437026
Q5BKZ1	ZNF326	53		P22234	PAICS	0.425523		P12931	SRC	80		P62244	RPS15A	0.436579
O94906	PRPF6	53		P39748	FEN1	0.425439		O60832	DKC1	80		P34932	HSPA4	0.43649
P82970	HMGN5	52		Q99729	HNRNPAB	0.425354		P61313	RPL15	79		Q9BQE3	TUBA1C	0.436222
P60842	EIF4A1	52		P23588	EIF4B	0.425354		P46779	RPL28	79		P52292	KPNA2	0.436222
Q13310	PABPC4	52		P09211	GSTP1	0.424846		O00567	NOP56	79		P31943	HNRNPH1	0.435955
Q9BUQ8	DDX23	51		Q92499	DDX1	0.424761		P60033	CD81	79		P30050	RPL12	0.435777
P52597	HNRNPF	51		Q92841	DDX17	0.424508		Q13200	PSMD2	78		Q12888	TP53BP1	0.435688
Q99873	PRMT1	51		P61081	UBE2M	0.424508		P15311	EZR	77		P18085	ARF4	0.435688
P32969	RPL9P9	51		O60749	SNX2	0.424423		O75643	SNRNP200	76		Q01081	U2AF1	0.43551
Q9Y3I0	RTCB	51		Q14677	CLINT1	0.424254		Q9NYF8	BCLAF1	75		P31689	DNAJA1	0.43551
O14964	HGS	51		P14618	PKM	0.424254		P46781	RPS9	75		Q14978	NOLC1	0.435421
Q9UQ35	SRRM2	50		Q9Y3F4	STRAP	0.424086		Q9H307	PNN	75		Q15149	PLEC	0.435421
Q92769	HDAC2	50		Q8WWM7	ATXN2L	0.423665		O95831	AIFM1	75		P26373	RPL13	0.435333
P48729	CSNK1A1	50		O15234	CASC3	0.423329		P31947	SFN	75		P55884	EIF3B	0.435333
P55795	HNRNPH2	50		P60842	EIF4A1	0.423077		Q86UE4	MTDH	75		Q9BQG0	MYBBP1A	0.435333
Q86XP3	DDX42	49		Q9UQ35	SRRM2	0.422742		P17813	ENG	75		Q13418	ILK	0.435155
Q9BYE2	TMPRSS13	49		P53999	SUB1	0.422742		Q16643	DBN1	74		O60716	CTNND1	0.435155
Q9Y383	LUC7L2	49		P50570	DNM2	0.422658		P61353	RPL27	74		Q00341	HDLBP	0.434978
Q99729	HNRNPAB	49		O60264	SMARCA5	0.422574		P35222	CTNNB1	74		Q9Y295	DRG1	0.434889
P11717	IGF2R	48		O75369	FLNB	0.422574		Q14978	NOLC1	74		Q16531	DDB1	0.434889
Q8TEQ6	GEMIN5	47		Q9UKX7	NUP50	0.422323		P62701	RPS4X	74		P62424	RPL7A	0.434446
P31942	HNRNPH3	46		Q06830	PRDX1	0.422323		P48634	PRRC2A	73		P62917	RPL8	0.434446
P62314	SNRPD1	46		Q14C86	GAPVD1	0.421989		P35606	COPB2	73		Q07020	RPL18	0.434446
P43487	RANBP1	46		Q06124	PTPN11	0.421739		Q99832	CCT7	73		P50990	CCT8	0.434446
Q92841	DDX17	46		P49750	YLPM1	0.421656		P21709	EPHA1	73		Q15003	NCAPH	0.434269
P49750	YLPM1	46		P35613	BSG	0.421656		Q9P0L0	VAPA	72		P83731	RPL24	0.434181
P52907	CAPZA1	45		Q6UN15	FIP1L1	0.421406		Q6P2Q9	PRPF8	72		P10599	TXN	0.433828
Q5UIP0	RIF1	45		Q05682	CALD1	0.421323		O43172	PRPF4	72		Q9Y490	TLN1	0.433828
O15234	CASC3	45		O14964	HGS	0.421073		P25786	PSMA1	72		P55072	VCP	0.43374
P62861	FAU	45		Q14847	LASP1	0.420741		P62979	RPS27A	71		P12270	TPR	0.433652
Q9GZS3	SKIC8	44		P35916	FLT4	0.420493		Q86V81	ALYREF	71		P62979	RPS27A	0.433564
O94776	MTA2	43		Q14739	LBR	0.420493		Q8IWX8	CHERP	71		P48643	CCT5	0.433387
Q8WW12	PCNP	43		P09382	LGALS1	0.42041		P60866	RPS20	70		P41091	EIF2S3	0.433212
P61221	ABCE1	43		Q14157	UBAP2L	0.42041		P62841	RPS15	70		P62857	RPS28	0.433124
P50570	DNM2	43		Q9UHD1	CHORDC1	0.420161		P62847	RPS24	69		P02786	TFRC	0.433036
P53999	SUB1	43		O43175	PHGDH	0.420079		P20700	LMNB1	69		Q14980	NUMA1	0.432948
P27361	MAPK3	42		Q5BKZ1	ZNF326	0.419831		Q1KMD3	HNRNPUL2	69		P61313	RPL15	0.432772
Q92945	KHSRP	42		P55010	EIF5	0.419583		O43290	SART1	69		P46781	RPS9	0.432772
P13010	XRCC5	42		O75534	CSDE1	0.419583		P09496	CLTA	69		Q07666	KHDRBS1	0.432772
P33991	MCM4	42		P08579	SNRPB2	0.419418		P61160	ACTR2	68		P62888	RPL30	0.432597
P55081	MFAP1	42		Q96DI7	SNRNP40	0.419336		Q96KR1	ZFR	68		Q96CW1	AP2M1	0.432421
O75554	WBP4	41		Q8TEQ6	GEMIN5	0.419171		Q15020	SART3	68		P05198	EIF2S1	0.432421
P46109	CRKL	41		P26599	PTBP1	0.419171		O00267	SUPT5H	68		P51148	RAB5C	0.432334
P35613	BSG	41		O94776	MTA2	0.419089		Q13451	FKBP5	68		Q86V81	ALYREF	0.431896
Q8IWZ8	SUGP1	41		P61158	ACTR3	0.419006		P46782	RPS5	66		P62829	RPL23	0.431896
O75937	DNAJC8	41		P28340	POLD1	0.41876		Q99497	PARK7	66		Q9H307	PNN	0.431722
Q6UN15	FIP1L1	41		P61604	HSPE1	0.418349		Q14152	EIF3A	66		O95831	AIFM1	0.43146
P27816	MAP4	41		Q96T58	SPEN	0.418267		Q9BQE3	TUBA1C	65		Q13492	PICALM	0.43146
Q9UKX7	NUP50	40		Q86U42	PABPN1	0.418103		Q9NZB2	FAM120A	65		Q12874	SF3A3	0.431373
P47914	RPL29	39		P35658	NUP214	0.418103		Q14676	MDC1	65		Q15428	SF3A2	0.431285
P23528	CFL1	39		Q96I24	FUBP3	0.417858		P39023	RPL3	64		P62847	RPS24	0.431285
P62937	PPIA	39		P83105	HTRA4	0.417449		P62244	RPS15A	64		O60884	DNAJA2	0.431285
Q8IYB3	SRRM1	39		Q9NWB6	ARGLU1	0.417449		P48643	CCT5	64		O75955	FLOT1	0.431285
P31948	STIP1	39		P32969	RPL9P9	0.417449		Q92522	H1-10	64		P37198	NUP62	0.431198
Q92499	DDX1	38		Q9Y5A9	YTHDF2	0.417449		Q99543	DNAJC2	64		P62269	RPS18	0.430937
Q96T58	SPEN	38		Q9H0C8	ILKAP	0.417041		Q07666	KHDRBS1	63		P61513	RPL37A	0.430763
Q8IX12	CCAR1	38		Q9UDY2	TJP2	0.41696		P62269	RPS18	63		P62701	RPS4X	0.430763
P61158	ACTR3	38		P26358	DNMT1	0.416634		P56537	EIF6	63		O00303	EIF3F	0.430763
Q9H1E3	NUCKS1	38		Q8IYB3	SRRM1	0.416472		P40227	CCT6A	63		P07237	P4HB	0.430763
Q13185	CBX3	37		Q9UKD2	MRTO4	0.416472		Q92820	GGH	63		Q9UHX1	PUF60	0.430676
O95819	MAP4K4	37		O14776	TCERG1	0.416066		Q9UHX1	PUF60	62		P12931	SRC	0.430589
P49023	PXN	37		P43487	RANBP1	0.415903		Q96I25	RBM17	62		P25705	ATP5F1A	0.430589
O43660	PLRG1	37		Q02790	FKBP4	0.415903		P49368	CCT3	62		P46779	RPL28	0.430502
Q9NQG5	RPRD1B	37		O15143	ARPC1B	0.415822		Q02543	RPL18A	62		P18621	RPL17	0.430329
O60264	SMARCA5	36		P34897	SHMT2	0.41566		Q15008	PSMD6	62		Q9UKV3	ACIN1	0.430329
P61081	UBE2M	36		P03950	ANG	0.415579		P09661	SNRPA1	62		Q14697	GANAB	0.430329
Q8N163	CCAR2	36		P47914	RPL29	0.415579		Q12874	SF3A3	61		Q99497	PARK7	0.430242
Q9UPT8	ZC3H4	36		Q9P258	RCC2	0.415094		Q9UKV3	ACIN1	61		O14744	PRMT5	0.430242
P23588	EIF4B	36		Q86XP3	DDX42	0.414772		Q14203	DCTN1	61		P20700	LMNB1	0.430069
Q8WWM7	ATXN2L	36		Q08380	LGALS3BP	0.41461		P43686	PSMC4	61		P61964	WDR5	0.430069
Q53GS9	USP39	36		O95347	SMC2	0.41461		Q14108	SCARB2	61		Q6P2Q9	PRPF8	0.429982
Q9UHD1	CHORDC1	35		Q9H6T3	RPAP3	0.41453		Q9Y5B9	SUPT16H	60		P56537	EIF6	0.429982
Q9Y3F4	STRAP	35		Q9UBB4	ATXN10	0.414449		P52292	KPNA2	60		Q9ULW0	TPX2	0.429636
Q13438	OS9	35		Q8WW12	PCNP	0.414369		P35998	PSMC2	60		P35998	PSMC2	0.429204
P55899	FCGRT	35		O43660	PLRG1	0.414369		Q5SSJ5	HP1BP3	60		O75400	PRPF40A	0.429031
P38646	HSPA9	35		Q9Y285	FARSA	0.414369		P62195	PSMC5	60		P62266	RPS23	0.429031
Q9H3N1	TMX1	35		O96019	ACTL6A	0.414288		P21802	FGFR2	60		Q1KMD3	HNRNPUL2	0.428945
P82979	SARNP	35		Q9ULV4	CORO1C	0.414128		P17174	GOT1	60		Q01082	SPTBN1	0.428945
Q14137	BOP1	35		P35221	CTNNA1	0.414047		P06493	CDK1	59		P40227	CCT6A	0.428772
P49327	FASN	34		O00422	SAP18	0.413887		P30050	RPL12	59		Q93009	USP7	0.428772
Q9C0J8	WDR33	34		P62633	CNBP	0.413806		O75400	PRPF40A	59		Q13177	PAK2	0.428686
P12830	CDH1	34		P61221	ABCE1	0.413806		P17987	TCP1	59		P41252	IARS1	0.428256
O43670	ZNF207	34		Q9UM54	MYO6	0.413726		Q02878	RPL6	59		P22061	PCMT1	0.42817
Q8N684	CPSF7	34		P54136	RARS1	0.413646		P62333	PSMC6	59		Q6P2E9	EDC4	0.42817
O14776	TCERG1	34		Q9UNZ2	NSFL1C	0.413646		P21860	ERBB3	59		P31947	SFN	0.428084
O15143	ARPC1B	33		P26583	HMGB2	0.413486		P20618	PSMB1	59		Q9BUF5	TUBB6	0.428084
O43684	BUB3	33		Q9HCN8	SDF2L1	0.413326		P18124	RPL7	59		Q96KR1	ZFR	0.427998
Q13242	SRSF9	33		Q8IX12	CCAR1	0.413006		Q09028	RBBP4	58		P17987	TCP1	0.427998
Q13033	STRN3	33		Q9BUQ8	DDX23	0.412846		O00159	MYO1C	58		O43493	TGOLN2	0.427827
Q06124	PTPN11	33		P55081	MFAP1	0.412527		O00560	SDCBP	58		Q13523	PRP4K	0.427484
P26599	PTBP1	33		P10321	HLA-C	0.412447		P46087	NOP2	57		Q13347	EIF3I	0.427484
Q86U42	PABPN1	33		Q8N684	CPSF7	0.412367		O00231	PSMD11	57		Q14152	EIF3A	0.427227
P22234	PAICS	32		Q14137	BOP1	0.412287		Q16531	DDB1	56		Q9BQA1	WDR77	0.427227
Q14118	DAG1	32		P27361	MAPK3	0.412049		P50990	CCT8	56		P47897	QARS1	0.427142
P98175	RBM10	32		Q96AE4	FUBP1	0.41189		Q93009	USP7	56		O76021	RSL1D1	0.426971
Q9H814	PHAX	32		P17096	HMGA1	0.411413		O15371	EIF3D	56		P53621	COPA	0.426971
O15144	ARPC2	32		O43396	TXNL1	0.411096		Q96GQ7	DDX27	56		O43491	EPB41L2	0.426971
Q9H6T3	RPAP3	32		Q9NQG5	RPRD1B	0.410938		Q03135	CAV1	56		O14974	PPP1R12A	0.426885
Q14739	LBR	32		Q01518	CAP1	0.410938		Q14204	DYNC1H1	55		P46778	RPL21	0.4268
P39748	FEN1	32		Q9UPT8	ZC3H4	0.410859		P83731	RPL24	55		Q9H0D6	XRN2	0.4268
P62312	LSM6	32		P82979	SARNP	0.410859		P62857	RPS28	55		A5YKK6	CNOT1	0.4268
P33992	MCM5	32		Q9UHD8	SEPTIN9	0.410464		Q13177	PAK2	55		P61247	RPS3A	0.426715
Q7Z4V5	HDGFL2	31		Q8TAQ2	SMARCC2	0.410148		P16989	YBX3	55		O43290	SART1	0.426715
Q9UKL0	RCOR1	31		P63151	PPP2R2A	0.409676		P50991	CCT4	55		O43707	ACTN4	0.426629
Q9UKD2	MRTO4	30		O00299	CLIC1	0.409676		P19525	EIF2AK2	55		Q9NZB2	FAM120A	0.426544
Q14677	CLINT1	30		O95486	SEC24A	0.40944		Q7L2H7	EIF3M	55		Q92522	H1-10	0.426374
P21246	PTN	30		Q9Y5K6	CD2AP	0.409283		P14625	HSP90B1	54		P05023	ATP1A1	0.426374
P35221	CTNNA1	30		P62314	SNRPD1	0.409047		P61289	PSME3	54		Q96AG4	LRRC59	0.426374
O43809	NUDT21	30		P37802	TAGLN2	0.409047		Q15007	WTAP	54		Q8IWX8	CHERP	0.426203
Q06830	PRDX1	30		O43670	ZNF207	0.408891		P17980	PSMC3	54		Q02878	RPL6	0.426203
O96019	ACTL6A	30		Q9NR09	BIRC6	0.408891		P08581	MET	54		Q15007	WTAP	0.426203
O43447	PPIH	30		P00558	PGK1	0.408656		Q9H8Y8	GORASP2	54		Q15084	PDIA6	0.426203
O00264	PGRMC1	30		Q5UIP0	RIF1	0.408187		Q92734	TFG	53		Q5SSJ5	HP1BP3	0.426118
P35658	NUP214	30		Q92769	HDAC2	0.408031		P37198	NUP62	53		O95782	AP2A1	0.426118
P59998	ARPC4	29		Q02241	KIF23	0.40733		Q9ULW0	TPX2	53		O60832	DKC1	0.425693
Q7RTV0	PHF5A	29		Q15185	PTGES3	0.407252		P60228	EIF3E	53		P16989	YBX3	0.425523
Q9BWU0	SLC4A1AP	29		P43246	MSH2	0.407019		Q6P1J9	CDC73	53		Q9HB71	CACYBP	0.425523
Q9UDY2	TJP2	29		O75175	CNOT3	0.406941		Q9UBQ5	EIF3K	53		P62841	RPS15	0.425439
O75369	FLNB	29		O43684	BUB3	0.406864		O43242	PSMD3	53		O43172	PRPF4	0.425354
P54136	RARS1	29		O43447	PPIH	0.406631		P62266	RPS23	52		P09496	CLTA	0.425269
P61604	HSPE1	29		Q16658	FSCN1	0.406012		Q13347	EIF3I	52		Q9UQE7	SMC3	0.425269
O43175	PHGDH	29		Q13242	SRSF9	0.405935		P46778	RPL21	52		P07814	EPRS1	0.425269
Q15942	ZYX	29		O43809	NUDT21	0.405858		P24941	CDK2	52		P62333	PSMC6	0.425015
Q08380	LGALS3BP	29		Q9H2P0	ADNP	0.405781		Q9HCE1	MOV10	52		P52272	HNRNPM	0.42493
Q9H0C8	ILKAP	28		O60869	EDF1	0.405395		O15372	EIF3H	52		P51149	RAB7A	0.42493
Q9NR09	BIRC6	28		Q99417	MYCBP	0.405318		Q13895	BYSL	52		P42566	EPS15	0.42493
Q14C86	GAPVD1	28		Q14126	DSG2	0.404703		P52272	HNRNPM	51		Q9ULX6	AKAP8L	0.424761
P17693	HLA-G	28		Q13185	CBX3	0.404626		P51148	RAB5C	50		P13693	TPT1	0.424677
P63151	PPP2R2A	28		P52789	HK2	0.404626		P39656	DDOST	50		P04843	RPN1	0.424677
Q9UNZ2	NSFL1C	28		Q9GZS3	SKIC8	0.40455		P54764	EPHA4	50		Q9BSJ8	ESYT1	0.424677
Q15654	TRIP6	28		Q96EP5	DAZAP1	0.40455		O75787	ATP6AP2	50		P62195	PSMC5	0.424592
O95456	PSMG1	28		P33992	MCM5	0.40432		P50454	SERPINH1	49		O95373	IPO7	0.424339
Q9H2P0	ADNP	28		Q96T23	RSF1	0.40432		P62829	RPL23	49		Q5T4S7	UBR4	0.424002
P34897	SHMT2	28		Q9BXJ9	NAA15	0.40409		O14744	PRMT5	49		O15371	EIF3D	0.423665
O60749	SNX2	28		Q15056	EIF4H	0.404014		P37108	SRP14	49		P14868	DARS1	0.423497
O60925	PFDN1	27		Q53GS9	USP39	0.403708		Q9Y3B4	SF3B6	49		P53618	COPB1	0.423497
P28340	POLD1	27		Q7Z4V5	HDGFL2	0.403403		Q9NQ29	LUC7L	49		Q96CT7	CCDC124	0.423245
Q8TAQ2	SMARCC2	27		Q8WVK2	SNRNP27	0.403326		P78527	PRKDC	48		Q96P70	IPO9	0.423245
P58546	MTPN	27		Q8IWZ8	SUGP1	0.403326		P28482	MAPK1	48		P60228	EIF3E	0.423161
Q8WYA6	CTNNBL1	27		P30044	PRDX5	0.40287		Q96CW1	AP2M1	48		P46459	NSF	0.423077
Q8WUD4	CCDC12	27		O00264	PGRMC1	0.40249		P61964	WDR5	48		Q96I25	RBM17	0.422993
Q14157	UBAP2L	27		P54652	HSPA2	0.402414		Q9ULX6	AKAP8L	48		P50991	CCT4	0.422993
P18583	SON	27		Q01105	SET	0.402262		Q96CT7	CCDC124	48		P24941	CDK2	0.422993
P98179	RBM3	27		Q5T200	ZC3H13	0.402186		P22392	NME2	48		Q9HCE1	MOV10	0.422993
Q9NWH9	SLTM	27		P31153	MAT2A	0.402035		Q9BUJ2	HNRNPUL1	48		Q9Y520	PRRC2C	0.422993
Q9ULV4	CORO1C	27		O00151	PDLIM1	0.402035		O00629	KPNA4	48		Q15424	SAFB	0.422993
Q9UBB4	ATXN10	26		O75717	WDHD1	0.401959		P63173	RPL38	48		Q15020	SART3	0.422909
P18887	XRCC1	26		Q9H814	PHAX	0.401883		Q99575	POP1	48		P06753	TPM3	0.422825
Q86X29	LSR	26		Q9NWH9	SLTM	0.401581		P55036	PSMD4	48		Q9NXV6	CDKN2AIP	0.422742
P14618	PKM	26		Q9Y2X3	NOP58	0.40143		P05198	EIF2S1	47		P22392	NME2	0.422658
Q02790	FKBP4	26		Q9UKL0	RCOR1	0.401279		O00303	EIF3F	47		P19525	EIF2AK2	0.422323
Q01105	SET	26		Q92541	RTF1	0.401052		Q9BQA1	WDR77	47		Q6P1J9	CDC73	0.422323
Q53EL6	PDCD4	26		P18887	XRCC1	0.400902		P53621	COPA	47		Q12931	TRAP1	0.422323
Q96I24	FUBP3	26		P26639	TARS1	0.400375		P04843	RPN1	47		P55060	CSE1L	0.422323
Q14011	CIRBP	26		P49023	PXN	0.400225		Q9BRJ6	C7orf50	47		P15311	EZR	0.42224
P26358	DNMT1	26		Q15181	PPA1	0.40015		Q9H2U1	DHX36	47		P49368	CCT3	0.42224
P19174	PLCG1	26		O95757	HSPA4L	0.400075		P30086	PEBP1	47		Q15437	SEC23B	0.422156
P09211	GSTP1	26		P62826	RAN	0.4		Q8N3V7	SYNPO	47		P78344	EIF4G2	0.422073
Q8ND56	LSM14A	26		Q16181	SEPTIN7	0.39985		Q15811	ITSN1	47		Q14683	SMC1A	0.421989
Q92797	SYMPK	25		P18583	SON	0.399775		P29317	EPHA2	47		Q9Y5Q8	GTF3C5	0.421989
Q9Y5K6	CD2AP	25		O94906	PRPF6	0.399551		P49720	PSMB3	47		Q9UBQ5	EIF3K	0.421822
Q9Y2X3	NOP58	25		P98175	RBM10	0.399028		P51149	RAB7A	46		Q86UP2	KTN1	0.421739
O75534	CSDE1	25		P35269	GTF2F1	0.398953		Q12931	TRAP1	46		P51610	HCFC1	0.421739
O95347	SMC2	25		O75886	STAM2	0.398879		P30101	PDIA3	46		P17980	PSMC3	0.421489
O75886	STAM2	25		P08243	ASNS	0.398581		O14818	PSMA7	46		Q99623	PHB2	0.421489
O75717	WDHD1	25		Q5T8P6	RBM26	0.398432		Q9Y262	EIF3L	46		Q9Y2Z0	SUGT1	0.421489
Q14847	LASP1	24		P11717	IGF2R	0.39806		Q9UNM6	PSMD13	46		Q14566	MCM6	0.421489
O43396	TXNL1	24		Q9C0J8	WDR33	0.397986		P62191	PSMC1	46		P37108	SRP14	0.421406
Q14126	DSG2	24		Q9BQ61	TRIR	0.397986		Q96FJ2	DYNLL2	46		P55265	ADAR	0.421406
P33240	CSTF2	24		P59998	ARPC4	0.397763		P10599	TXN	45		P20042	EIF2S2	0.421406
P35269	GTF2F1	24		Q12996	CSTF3	0.397689		Q9Y520	PRRC2C	45		P35580	MYH10	0.421157
Q9Y5A9	YTHDF2	24		O75607	NPM3	0.397541		Q86UP2	KTN1	45		Q92973	TNPO1	0.421073
O00401	WASL	24		Q12802	AKAP13	0.397467		P42224	STAT1	45		P17612	PRKACA	0.421073
Q99549	MPHOSPH8	24		O95163	ELP1	0.397393		Q13123	IK	45		Q9Y6G9	DYNC1LI1	0.421073
Q6UXN9	WDR82	23		Q6PGP7	SKIC3	0.397393		O14579	COPE	45		Q7L2H7	EIF3M	0.42099
P14635	CCNB1	23		Q86X29	LSR	0.397245		P10155	RO60	45		Q86UE4	MTDH	0.420907
P27695	APEX1	23		Q9BRP8	PYM1	0.397245		Q13153	PAK1	45		P42224	STAT1	0.420824
P43246	MSH2	23		Q9H3N1	TMX1	0.397097		P49721	PSMB2	45		P15924	DSP	0.420824
O95486	SEC24A	23		P49006	MARCKSL1	0.397097		P55072	VCP	44		O00567	NOP56	0.420741
Q96AE4	FUBP1	23		P52209	PGD	0.396949		P30876	POLR2B	44		P46087	NOP2	0.420741
P52735	VAV2	23		Q9UJA5	TRMT6	0.396876		P28066	PSMA5	44		P30876	POLR2B	0.420658
O95352	ATG7	23		Q9UKK9	NUDT5	0.396212		P60900	PSMA6	44		Q9H444	CHMP4B	0.420327
P13497	BMP1	22		P82970	HMGN5	0.396139		P04439	HLA-A	44		Q15645	TRIP13	0.420244
Q92541	RTF1	22		O76024	WFS1	0.395845		Q13257	MAD2L1	44		P08195	SLC3A2	0.420244
Q9UM54	MYO6	22		Q9NTK5	OLA1	0.395772		O75368	SH3BGRL	44		Q86YP4	GATAD2A	0.420161
Q5T200	ZC3H13	22		P13797	PLS3	0.395698		P29350	PTPN6	44		Q13123	IK	0.420079
Q9C0C4	SEMA4C	22		O75937	DNAJC8	0.395551		P49184	DNASE1L1	44		Q01813	PFKP	0.419748
O95989	NUDT3	22		Q14738	PPP2R5D	0.395551		Q14008	CKAP5	43		P21860	ERBB3	0.419583
Q15291	RBBP5	22		Q92785	DPF2	0.395185		P34932	HSPA4	43		Q9BUJ2	HNRNPUL1	0.419583
Q8IVD9	NUDCD3	22		Q9BWU0	SLC4A1AP	0.394893		Q15149	PLEC	43		O75367	MACROH2A1	0.419583
O43653	PSCA	22		P14635	CCNB1	0.394455		P51610	HCFC1	43		P46060	RANGAP1	0.419583
Q9UHD8	SEPTIN9	21		Q53EL6	PDCD4	0.394382		O75150	RNF40	43		O00159	MYO1C	0.419418
Q9Y285	FARSA	21		O15144	ARPC2	0.394309		P08708	RPS17	43		P20618	PSMB1	0.419253
Q53HC9	EIPR1	21		Q9H0U4	RAB1B	0.393147		P62820	RAB1A	43		Q02543	RPL18A	0.419006
Q9Y2A9	B3GNT3	21		P10768	ESD	0.392785		Q96MU7	YTHDC1	43		P00338	LDHA	0.419006
Q16181	SEPTIN7	21		P52594	AGFG1	0.392785		Q9NWT1	PAK1IP1	43		P07195	LDHB	0.41876
P37802	TAGLN2	21		Q14118	DAG1	0.392713		P49755	TMED10	43		P30101	PDIA3	0.418678
Q02241	KIF23	21		Q08752	PPID	0.392713		Q9UHD9	UBQLN2	43		Q13501	SQSTM1	0.418678
P42574	CASP3	21		Q9NSD9	FARSB	0.39264		Q00341	HDLBP	42		Q9H3P7	ACBD3	0.418678
Q9H0U4	RAB1B	21		Q8IVD9	NUDCD3	0.392424		O60884	DNAJA2	42		O00231	PSMD11	0.418596
O75175	CNOT3	21		P12830	CDH1	0.392279		Q9H0D6	XRN2	42		P27694	RPA1	0.418596
Q8TBA6	GOLGA5	21		P27695	APEX1	0.392207		O43707	ACTN4	42		Q9NYL9	TMOD3	0.418513
Q5T8P6	RBM26	21		O14737	PDCD5	0.391416		Q9H444	CHMP4B	42		P53396	ACLY	0.418431
Q8NC96	NECAP1	20		Q14011	CIRBP	0.391344		P42285	MTREX	42		P42285	MTREX	0.418349
O95757	HSPA4L	20		O75874	IDH1	0.391272		O00505	KPNA3	42		Q15008	PSMD6	0.418267
Q96ST2	IWS1	20		O60678	PRMT3	0.390771		P24928	POLR2A	42		P53985	SLC16A1	0.418267
P31153	MAT2A	20		P13984	GTF2F2	0.390556		P49207	RPL34	42		Q9UPN3	MACF1	0.418267
Q15019	SEPTIN2	20		Q9NTJ3	SMC4	0.390556		Q9Y4Z0	LSM4	42		Q9P2E9	RRBP1	0.418103
P13797	PLS3	20		Q9NR50	EIF2B3	0.390485		Q96RS6	NUDCD1	42		P48444	ARCN1	0.418103
Q8N6T3	ARFGAP1	20		P98179	RBM3	0.390271		Q9Y5K5	UCHL5	42		Q92922	SMARCC1	0.418022
Q9BQ61	TRIR	20		P43490	NAMPT	0.390271		P51665	PSMD7	42		P63220	RPS21	0.41794
Q9NR50	EIF2B3	20		Q9H1E3	NUCKS1	0.390199		Q15714	TSC22D1	42		Q5T6F2	UBAP2	0.41794
Q969U7	PSMG2	20		P19174	PLCG1	0.389203		P51608	MECP2	42		Q14671	PUM1	0.41794
Q96T23	RSF1	20		Q9BZK7	TBL1XR1	0.389132		P25787	PSMA2	42		P39656	DDOST	0.417858
P05090	APOD	20		P23193	TCEA1	0.388848		Q99436	PSMB7	42		P06733	ENO1	0.417858
P23142	FBLN1	20		Q99549	MPHOSPH8	0.388778		P47897	QARS1	41		P33176	KIF5B	0.417613
P84085	ARF5	19		Q6UX04	CWC27	0.387929		O14974	PPP1R12A	41		Q9BRJ6	C7orf50	0.417531
Q69YN2	CWF19L1	19		Q9UKY7	CDV3	0.387788		Q15424	SAFB	41		P18206	VCL	0.417531
Q9BXJ9	NAA15	19		Q15942	ZYX	0.387085		P55265	ADAR	41		Q10567	AP1B1	0.417531
O14737	PDCD5	19		P42574	CASP3	0.387085		Q04721	NOTCH2	41		O00629	KPNA4	0.417449
O60828	PQBP1	19		Q92688	ANP32B	0.386945		O00487	PSMD14	41		Q9BTC0	DIDO1	0.417286
Q9BRP8	PYM1	19		P30084	ECHS1	0.386594		O60508	CDC40	41		Q9H9B1	EHMT1	0.417204
Q99417	MYCBP	19		Q15291	RBBP5	0.385965		Q1ED39	KNOP1	41		Q06265	EXOSC9	0.417123
Q9P258	RCC2	18		P55899	FCGRT	0.385756		P02786	TFRC	40		P25786	PSMA1	0.417041
Q6P996	PDXDC1	18		P33240	CSTF2	0.385616		P41252	IARS1	40		Q00325	SLC25A3	0.416878
P00558	PGK1	18		Q9UEE9	CFDP1	0.384643		O95373	IPO7	40		O94992	HEXIM1	0.416715
Q12996	CSTF3	18		Q8N1G4	LRRC47	0.383882		O94992	HEXIM1	40		Q9Y224	RTRAF	0.416715
O43865	AHCYL1	18		Q9NTI5	PDS5B	0.383882		P07305	H1-0	40		Q5VTR2	RNF20	0.416715
O43505	B4GAT1	18		Q8WYA6	CTNNBL1	0.383744		O60341	KDM1A	40		P18754	RCC1	0.416553
Q92785	DPF2	18		Q8WUD4	CCDC12	0.383606		P30622	CLIP1	40		P61163	ACTR1A	0.416553
P16220	CREB1	18		Q69YN2	CWF19L1	0.383606		Q06418	TYRO3	40		Q9Y3B4	SF3B6	0.416472
O95163	ELP1	18		Q9Y263	PLAA	0.383537		P06730	EIF4E	40		P60660	MYL6	0.41639
P61956	SUMO2	18		Q96ST2	IWS1	0.383261		P28070	PSMB4	40		O00267	SUPT5H	0.416228
P49006	MARCKSL1	18		Q8ND56	LSM14A	0.382918		P31689	DNAJA1	39		O14579	COPE	0.416228
O00151	PDLIM1	18		P40818	USP8	0.382918		P07237	P4HB	39		Q92616	GCN1	0.416228
P52789	HK2	18		Q06203	PPAT	0.382918		P25705	ATP5F1A	39		Q9P2J5	LARS1	0.416228
P49354	FNTA	17		O43865	AHCYL1	0.382437		Q9UQE7	SMC3	39		P40926	MDH2	0.416228
Q08752	PPID	17		Q15654	TRIP6	0.381958		P42566	EPS15	39		P45880	VDAC2	0.415984
Q8N9N8	EIF1AD	17		P49591	SARS1	0.381821		Q9NXV6	CDKN2AIP	39		Q96GQ7	DDX27	0.415822
P42167	TMPO	17		Q5T0N5	FNBP1L	0.381753		Q14683	SMC1A	39		P18124	RPL7	0.415741
Q16658	FSCN1	17		P21246	PTN	0.381617		Q99623	PHB2	39		O75150	RNF40	0.415741
Q15181	PPA1	17		P58546	MTPN	0.381344		P20042	EIF2S2	39		P08708	RPS17	0.415741
Q9NVX2	NLE1	17		Q92797	SYMPK	0.381208		Q92973	TNPO1	39		P78406	RAE1	0.415741
P13984	GTF2F2	17		P40222	TXLNA	0.381071		O75367	MACROH2A1	39		Q92620	DHX38	0.41566
Q13951	CBFB	17		Q8N6T3	ARFGAP1	0.380935		Q9BTC0	DIDO1	39		P62820	RAB1A	0.415498
P78318	IGBP1	17		Q9HA64	FN3KRP	0.380935		P18754	RCC1	39		Q9H3P2	NELFA	0.415498
Q14738	PPP2R5D	17		P84085	ARF5	0.38046		Q9Y4E8	USP15	39		Q15075	EEA1	0.415175
Q12802	AKAP13	17		Q9NX02	NLRP2	0.38046		Q6NZY4	ZCCHC8	39		Q14203	DCTN1	0.415014
Q01518	CAP1	17		P05091	ALDH2	0.37985		P41743	PRKCI	39		P43686	PSMC4	0.415014
Q6PGP7	SKIC3	17		P11441	UBL4A	0.379783		P28074	PSMB5	39		P50579	METAP2	0.414933
Q13308	PTK7	17		P46736	BRCC3	0.379243		Q9UMX0	UBQLN1	39		Q9H2U1	DHX36	0.414852
Q8N1G4	LRRC47	16		P05090	APOD	0.379176		Q04837	SSBP1	38		O00505	KPNA3	0.414852
P40818	USP8	16		Q9H6Z4	RANBP3	0.379176		Q9HB71	CACYBP	38		Q9Y5X1	SNX9	0.414852
Q9UJW0	DCTN4	16		Q9Y5Y6	ST14	0.379108		P46459	NSF	38		P49915	GMPS	0.414852
Q7Z5G4	GOLGA7	16		P39687	ANP32A	0.378974		Q9Y2Z0	SUGT1	38		P12814	ACTN1	0.414691
Q8N8S7	ENAH	16		Q9NZ63	C9orf78	0.378906		Q14566	MCM6	38		O14818	PSMA7	0.41461
O94888	UBXN7	16		Q15019	SEPTIN2	0.378772		P46060	RANGAP1	38		O60763	USO1	0.41461
Q96EP5	DAZAP1	16		Q6P996	PDXDC1	0.378772		P63220	RPS21	38		Q8WUM4	PDCD6IP	0.41453
P49257	LMAN1	16		P52735	VAV2	0.37857		Q9UKG1	APPL1	38		P09661	SNRPA1	0.414449
O60869	EDF1	16		P61956	SUMO2	0.378503		Q5JSZ5	PRRC2B	38		P21802	FGFR2	0.414449
P17480	UBTF	16		O15347	HMGB3	0.378436		Q06323	PSME1	38		P63173	RPL38	0.414449
Q9Y263	PLAA	16		O94888	UBXN7	0.3779		P98172	EFNB1	38		Q92576	PHF3	0.414449
Q9NTI5	PDS5B	16		Q99856	ARID3A	0.377833		P50613	CDK7	38		Q5JTV8	TOR1AIP1	0.414449
Q9UHF1	EGFL7	16		P07741	APRT	0.377232		P18085	ARF4	37		Q15436	SEC23A	0.414288
Q9UHR5	SAP30BP	16		P42167	TMPO	0.377165		Q96KQ7	EHMT2	37		P17812	CTPS1	0.414208
P30044	PRDX5	16		O75554	WBP4	0.376899		Q8IZP0	ABI1	37		O95425	SVIL	0.414128
Q8NFH3	NUP43	15		Q92673	SORL1	0.376766		P18031	PTPN1	37		P27797	CALR	0.413967
Q92673	SORL1	15		Q15417	CNN3	0.376766		P25788	PSMA3	37		Q13451	FKBP5	0.413726
Q9Y281	CFL2	15		P17480	UBTF	0.375969		Q01973	ROR1	37		Q7L014	DDX46	0.413566
Q9Y6A5	TACC3	15		P51003	PAPOLA	0.375704		Q86Y82	STX12	37		Q99733	NAP1L4	0.413406
Q9NTK5	OLA1	15		P78318	IGBP1	0.375176		P22061	PCMT1	36		P30086	PEBP1	0.413326
P43490	NAMPT	15		Q9UHR5	SAP30BP	0.375176		O95782	AP2A1	36		Q9Y4E8	USP15	0.413326
Q96L92	SNX27	15		Q9NVX2	NLE1	0.374846		P17612	PRKACA	36		Q6NZY4	ZCCHC8	0.413246
Q8NFH4	NUP37	15		Q9UHF1	EGFL7	0.374649		Q13501	SQSTM1	36		P49411	TUFM	0.413246
Q9UEE9	CFDP1	15		Q13438	OS9	0.37432		P18206	VCL	36		Q9UKG1	APPL1	0.413086
Q99856	ARID3A	15		Q14320	FAM50A	0.373992		Q99590	SCAF11	36		P42166	TMPO	0.413086
Q92688	ANP32B	15		P55327	TPD52	0.37373		Q00577	PURA	36		P24928	POLR2A	0.413006
Q9UKK9	NUDT5	15		O15212	PFDN6	0.373665		O75822	EIF3J	36		Q05209	PTPN12	0.413006
O00299	CLIC1	15		P30520	ADSS2	0.373012		P49756	RBM25	36		P50402	EMD	0.413006
O15212	PFDN6	15		P37235	HPCAL1	0.372621		P84095	RHOG	36		Q96KQ7	EHMT2	0.412926
P16035	TIMP2	15		P49257	LMAN1	0.372166		P43307	SSR1	36		P13861	PRKAR2A	0.412926
Q9Y240	CLEC11A	15		P23142	FBLN1	0.372036		Q13011	ECH1	36		O15372	EIF3H	0.412846
P15104	GLUL	15		Q9Y657	SPIN1	0.371907		Q9H074	PAIP1	36		Q8N3V7	SYNPO	0.412846
P40222	TXLNA	15		Q13308	PTK7	0.371453		O76071	CIAO1	36		Q99590	SCAF11	0.412846
O14908	GIPC1	14		Q9Y281	CFL2	0.371453		P51572	BCAP31	36		Q9NQ29	LUC7L	0.412766
Q10471	GALNT2	14		Q7RTV0	PHF5A	0.371389		Q9GZZ9	UBA5	36		Q14676	MDC1	0.412606
Q9NSD9	FARSB	14		Q7Z5G4	GOLGA7	0.370872		P54105	CLNS1A	36		P49321	NASP	0.412606
Q13952	NFYC	14		Q6UXN9	WDR82	0.370422		O60716	CTNND1	35		Q13895	BYSL	0.412527
P54760	EPHB4	14		Q7Z406	MYH14	0.369908		O43491	EPB41L2	35		Q99575	POP1	0.412527
Q9NZ63	C9orf78	14		Q00688	FKBP3	0.369716		P05023	ATP1A1	35		Q9P2N5	RBM27	0.412367
P23193	TCEA1	14		P23919	DTYMK	0.36946		Q9Y6G9	DYNC1LI1	35		Q7Z478	DHX29	0.412367
P08243	ASNS	14		Q13952	NFYC	0.369268		Q9Y224	RTRAF	35		P15927	RPA2	0.412367
P14854	COX6B1	14		O95456	PSMG1	0.368758		P61163	ACTR1A	35		Q7Z6Z7	HUWE1	0.412287
Q8NBZ7	UXS1	14		Q5T6V5	QNG1	0.368758		Q92620	DHX38	35		O00560	SDCBP	0.412208
P46063	RECQL	14		Q8N8S7	ENAH	0.368376		Q92576	PHF3	35		Q96SI9	STRBP	0.412128
P30084	ECHS1	14		Q9H223	EHD4	0.368185		P27797	CALR	35		P28066	PSMA5	0.412049
P61960	UFM1	14		P30419	NMT1	0.368121		Q9UNE7	STUB1	35		Q9Y678	COPG1	0.412049
Q7Z406	MYH14	14		Q96NC0	ZMAT2	0.368121		Q9UNP9	PPIE	35		Q8TEM1	NUP210	0.412049
Q15056	EIF4H	13		Q8NEZ5	FBXO22	0.367551		Q96KG9	SCYL1	35		P08581	MET	0.411969
P30419	NMT1	13		Q92979	EMG1	0.367045		P12270	TPR	34		Q9C0C2	TNKS1BP1	0.411969
Q9UJA5	TRMT6	13		O95685	PPP1R3D	0.366856		Q13492	PICALM	34		Q15375	EPHA7	0.41181
P32456	GBP2	13		P18433	PTPRA	0.366289		O75955	FLOT1	34		P60900	PSMA6	0.411651
Q9BZL1	UBL5	13		Q5TEC6	H3-7	0.366289		Q14697	GANAB	34		P07305	H1-0	0.411572
Q12907	LMAN2	13		P62312	LSM6	0.366101		P14868	DARS1	34		Q04721	NOTCH2	0.411413
P49247	RPIA	13		Q9UJW0	DCTN4	0.365912		Q86YP4	GATAD2A	34		Q9H2G2	SLK	0.411413
P47813	EIF1AX	13		P46063	RECQL	0.365849		Q9NYL9	TMOD3	34		Q8WVM8	SCFD1	0.411255
P46736	BRCC3	13		O60828	PQBP1	0.365787		Q15075	EEA1	34		P12268	IMPDH2	0.411255
O60678	PRMT3	13		O00401	WASL	0.365223		Q9Y6E0	STK24	34		P49207	RPL34	0.411175
P60981	DSTN	12		Q9UK41	VPS28	0.365161		Q9NR12	PDLIM7	34		Q5JSZ5	PRRC2B	0.411175
P11441	UBL4A	12		Q13724	MOGS	0.365098		Q99523	SORT1	34		Q14232	EIF2B1	0.411017
Q9ULF5	SLC39A10	12		Q92882	OSTF1	0.364786		Q15018	ABRAXAS2	34		Q9BXS5	AP1M1	0.411017
Q7L5D6	GET4	12		O95394	PGM3	0.364724		Q6P2E9	EDC4	33		Q9UHR4	BAIAP2L1	0.410622
Q9Y657	SPIN1	12		P47813	EIF1AX	0.364662		A5YKK6	CNOT1	33		Q06323	PSME1	0.410464
Q5KU26	COLEC12	12		Q9NZL9	MAT2B	0.363853		P07814	EPRS1	33		P43034	PAFAH1B1	0.410464
Q96NC0	ZMAT2	12		Q9Y237	PIN4	0.363543		Q96P70	IPO9	33		Q8WXH0	SYNE2	0.410464
Q5T0N5	FNBP1L	12		P50897	PPT1	0.363358		P06753	TPM3	33		P05556	ITGB1	0.410306
Q9GZZ1	NAA50	12		Q13951	CBFB	0.363296		P78344	EIF4G2	33		Q3MHD2	LSM12	0.410227
Q13443	ADAM9	12		Q9NRX4	PHPT1	0.363234		Q9P2E9	RRBP1	33		Q29RF7	PDS5A	0.409833
Q15768	EFNB3	12		Q8TBA6	GOLGA5	0.36311		Q9P2N5	RBM27	33		Q9H3S7	PTPN23	0.409754
P52209	PGD	12		P16220	CREB1	0.362371		Q96SI9	STRBP	33		P41743	PRKCI	0.409676
Q13361	MFAP5	12		O60925	PFDN1	0.362063		Q9UPN9	TRIM33	33		Q9ULU4	ZMYND8	0.409676
Q06481	APLP2	12		Q8N9N8	EIF1AD	0.361634		O95817	BAG3	33		Q99615	DNAJC7	0.40944
Q14320	FAM50A	12		Q13464	ROCK1	0.361511		Q12792	TWF1	33		O75390	CS	0.40944
Q9BYC5	FUT8	12		Q9BQI0	AIF1L	0.361511		Q8WXA9	SREK1	33		Q13561	DCTN2	0.409126
P20338	RAB4A	12		Q96L92	SNX27	0.361144		P09497	CLTB	33		Q9Y2A7	NCKAP1	0.409047
P10586	PTPRF	12		O94855	SEC24D	0.360839		P60510	PPP4C	33		P56192	MARS1	0.408969
Q9Y237	PIN4	12		P22692	IGFBP4	0.360717		O14672	ADAM10	33		P00367	GLUD1	0.408969
P49641	MAN2A2	12		Q8NFH3	NUP43	0.36029		Q9NY97	B3GNT2	33		Q8IZP0	ABI1	0.408812
P05091	ALDH2	11		Q9C0C4	SEMA4C	0.359987		Q01082	SPTBN1	32		P52701	MSH6	0.408812
Q9UK41	VPS28	11		Q15061	WDR43	0.359865		Q9Y5Q8	GTF3C5	32		O60341	KDM1A	0.408656
Q13464	ROCK1	11		P14854	COX6B1	0.359441		Q92922	SMARCC1	32		P18669	PGAM1	0.408109
Q9Y6Y8	SEC23IP	11		P13497	BMP1	0.35932		Q9H9B1	EHMT1	32		Q00577	PURA	0.407953
P37235	HPCAL1	11		P37837	TALDO1	0.359259		Q06265	EXOSC9	32		Q9UPN9	TRIM33	0.407563
Q9UM47	NOTCH3	11		P15104	GLUL	0.359199		P12814	ACTN1	32		O75822	EIF3J	0.407485
O60512	B4GALT3	11		Q13033	STRN3	0.359017		O95425	SVIL	32		O43242	PSMD3	0.407407
P09958	FURIN	11		P61960	UFM1	0.359017		Q9Y333	LSM2	32		Q8N4C8	MINK1	0.407407
Q9BZK7	TBL1XR1	11		Q9ULF5	SLC39A10	0.358054		Q9Y3B9	RRP15	32		O00487	PSMD14	0.40733
Q9NTJ3	SMC4	11		O15427	SLC16A3	0.357994		O15084	ANKRD28	32		O15160	POLR1C	0.40733
Q15061	WDR43	11		Q9UMY1	NOL7	0.357814		Q6IN85	PPP4R3A	32		Q03252	LMNB2	0.40733
Q969P0	IGSF8	11		Q15768	EFNB3	0.357754		P25789	PSMA4	32		Q9Y262	EIF3L	0.407252
Q99988	GDF15	11		P51580	TPMT	0.357694		Q15262	PTPRK	32		Q96MU7	YTHDC1	0.407097
O15427	SLC16A3	11		A1X283	SH3PXD2B	0.357514		Q14192	FHL2	32		P13667	PDIA4	0.407097
Q92979	EMG1	10		P60981	DSTN	0.357334		Q9Y490	TLN1	31		P04439	HLA-A	0.407019
P10768	ESD	10		Q53HC9	EIPR1	0.356976		Q9BUF5	TUBB6	31		P55196	AFDN	0.406941
Q6UX04	CWC27	10		P07333	CSF1R	0.356379		Q15084	PDIA6	31		P29144	TPP2	0.406941
O43488	AKR7A2	10		Q9NRN7	AASDHPPT	0.356379		Q9BSJ8	ESYT1	31		P14314	PRKCSH	0.406864
Q96AT1	KIAA1143	10		Q9GZZ1	NAA50	0.356082		P55060	CSE1L	31		P27448	MARK3	0.406786
P51805	PLXNA3	10		Q96IZ0	PAWR	0.355845		Q5T6F2	UBAP2	31		Q14240	EIF4A2	0.406786
Q96NY8	NECTIN4	10		Q8NFH4	NUP37	0.35543		Q00325	SLC25A3	31		Q14108	SCARB2	0.406709
Q14766	LTBP1	10		P10586	PTPRF	0.355371		Q7L014	DDX46	31		Q9BTC8	MTA3	0.406709
Q9H4A6	GOLPH3	10		P54760	EPHB4	0.355193		Q05209	PTPN12	31		Q92878	RAD50	0.406631
Q92882	OSTF1	10		Q8NC96	NECAP1	0.35378		Q9Y678	COPG1	31		Q99961	SH3GL1	0.406631
O75874	IDH1	10		Q8NBZ7	UXS1	0.353663		Q8WVM8	SCFD1	31		Q02880	TOP2B	0.406554
O76061	STC2	10		P49354	FNTA	0.353428		P05556	ITGB1	31		Q99439	CNN2	0.406476
P51003	PAPOLA	10		Q99988	GDF15	0.352611		P27448	MARK3	31		Q9NU22	MDN1	0.406399
Q86TI2	DPP9	9		O76061	STC2	0.352611		Q14240	EIF4A2	31		P67936	TPM4	0.406321
P49591	SARS1	9		Q06481	APLP2	0.352494		P61011	SRP54	31		Q14839	CHD4	0.406244
O15347	HMGB3	9		P09958	FURIN	0.352436		Q14694	USP10	31		Q12768	WASHC5	0.406244
Q5SRI9	MANEA	9		Q9H4A6	GOLPH3	0.352378		P28072	PSMB6	31		Q8TEX9	IPO4	0.406167
P52803	EFNA5	9		P51805	PLXNA3	0.35232		Q9NY27	PPP4R2	31		P54819	AK2	0.405858
O75054	IGSF3	9		O95352	ATG7	0.351507		Q9BXS4	TMEM59	31		P49756	RBM25	0.405703
P18433	PTPRA	9		Q10471	GALNT2	0.351507		Q96AG4	LRRC59	30		Q93008	USP9X	0.405549
P26639	TARS1	9		Q9Y2A9	B3GNT3	0.351102		P33176	KIF5B	30		O95747	OXSR1	0.405472
Q9H223	EHD4	9		Q96AT1	KIAA1143	0.351102		Q10567	AP1B1	30		P41250	GARS1	0.405472
P22692	IGFBP4	9		P49247	RPIA	0.350987		Q9H3P2	NELFA	30		Q9H3K6	BOLA2B	0.405472
P50895	BCAM	9		P50591	TNFSF10	0.350641		Q14232	EIF2B1	30		O94973	AP2A2	0.405395
Q9NX02	NLRP2	9		P78417	GSTO1	0.350181		O15160	POLR1C	30		Q15811	ITSN1	0.405318
P52594	AGFG1	9		O95989	NUDT3	0.349721		P55735	SEC13	30		P18031	PTPN1	0.405318
Q86SF2	GALNT7	9		P61024	CKS1B	0.349607		P55769	SNU13	30		P60174	TPI1	0.405241
Q13724	MOGS	9		Q5KU26	COLEC12	0.34955		P27105	STOM	30		Q9NWT1	PAK1IP1	0.405164
Q00688	FKBP3	9		Q13443	ADAM9	0.349092		Q13526	PIN1	30		P30048	PRDX3	0.40501
P39687	ANP32A	9		Q969U7	PSMG2	0.349035		P61106	RAB14	30		O14828	SCAMP3	0.404934
Q02818	NUCB1	9		P21291	CSRP1	0.348465		Q8NC42	RNF149	30		Q15907	RAB11B	0.40478
O00391	QSOX1	9		O43252	PAPSS1	0.348124		Q99471	PFDN5	30		Q9HAV4	XPO5	0.404703
Q9Y264	ANGPT4	8		P50895	BCAM	0.34801		Q15437	SEC23B	29		Q6IBS0	TWF2	0.404703
P49419	ALDH7A1	8		Q9Y240	CLEC11A	0.347897		Q15645	TRIP13	29		Q9P206	NHSL3	0.404626
P07333	CSF1R	8		Q9Y6A5	TACC3	0.347331		P27694	RPA1	29		P52565	ARHGDIA	0.404626
P55327	TPD52	8		Q5T2T1	MPP7	0.347218		P50402	EMD	29		P10155	RO60	0.40455
P61024	CKS1B	8		Q02818	NUCB1	0.346541		Q7Z478	DHX29	29		P49959	MRE11	0.404473
Q5TEC6	H3-7	8		O75054	IGSF3	0.346316		Q29RF7	PDS5A	29		P55036	PSMD4	0.404167
Q9H6Z4	RANBP3	8		P36955	SERPINF1	0.346316		P56192	MARS1	29		Q13153	PAK1	0.40409
Q9UMY1	NOL7	8		P62256	UBE2H	0.345811		P13667	PDIA4	29		P61011	SRP54	0.404014
Q5T2T1	MPP7	8		Q9Y6Y8	SEC23IP	0.345699		Q9P206	NHSL3	29		P30041	PRDX6	0.404014
Q8WVQ1	CANT1	8		P32456	GBP2	0.345196		Q9Y2W2	WBP11	29		P35659	DEK	0.404014
Q4G0F5	VPS26B	8		Q96FK6	WDR89	0.344973		O15145	ARPC3	29		P29317	EPHA2	0.403861
O95685	PPP1R3D	8		Q12907	LMAN2	0.344861		O43815	STRN	29		O95817	BAG3	0.403784
P17900	GM2A	8		O43505	B4GAT1	0.34436		P06396	GSN	29		P04181	OAT	0.403784
Q6UWY0	ARSK	8		Q9UM47	NOTCH3	0.344249		P61019	RAB2A	29		P84095	RHOG	0.403708
P30520	ADSS2	7		Q9BYE2	TMPRSS13	0.344083		Q9Y3C6	PPIL1	29		Q99496	RNF2	0.403632
P00568	AK1	7		O43516	WIPF1	0.344027		Q9NPF4	OSGEP	29		P51659	HSD17B4	0.403555
O43252	PAPSS1	7		P15121	AKR1B1	0.344027		Q8WVY7	UBLCP1	29		P29401	TKT	0.403555
Q96FK6	WDR89	7		Q9BZL1	UBL5	0.343972		Q9NZL4	HSPBP1	29		Q13409	DYNC1I2	0.403326
Q9UKY7	CDV3	7		O14908	GIPC1	0.343639		Q9BWJ5	SF3B5	29		Q13564	NAE1	0.403326
Q16394	EXT1	7		P00568	AK1	0.342811		P48444	ARCN1	28		P55735	SEC13	0.40325
Q9NZL9	MAT2B	7		P49419	ALDH7A1	0.341878		Q14671	PUM1	28		P18615	NELFE	0.403174
Q9BQT9	CLSTN3	7		P49641	MAN2A2	0.341385		Q92616	GCN1	28		P49721	PSMB2	0.403098
Q9BQI0	AIF1L	7		Q9Y2V2	CARHSP1	0.341331		P78406	RAE1	28		P28074	PSMB5	0.403022
Q9HA64	FN3KRP	7		P16035	TIMP2	0.341167		Q9Y5X1	SNX9	28		P17174	GOT1	0.402566
P00167	CYB5A	7		Q86TI2	DPP9	0.341004		Q13561	DCTN2	28		Q12792	TWF1	0.402566
Q06203	PPAT	7		P36871	PGM1	0.340731		P00367	GLUD1	28		Q9UNM6	PSMD13	0.40249
Q92729	PTPRU	7		Q7L5D6	GET4	0.340405		Q02880	TOP2B	28		P21709	EPHA1	0.402414
Q86X76	NIT1	7		P36969	GPX4	0.339917		Q14839	CHD4	28		P61201	COPS2	0.402338
O95631	NTN1	7		P00167	CYB5A	0.339701		P51531	SMARCA2	28		P15170	GSPT1	0.402186
Q96EU7	C1GALT1C1	6		Q6YP21	KYAT3	0.339701		Q9P2I0	CPSF2	28		Q9UNE7	STUB1	0.402186
P50897	PPT1	6		Q969P0	IGSF8	0.339593		Q99598	TSNAX	28		Q9H4M9	EHD1	0.40211
P14317	HCLS1	6		O75071	EFCAB14	0.339323		Q7KZ85	SUPT6H	28		Q14694	USP10	0.402035
O43405	COCH	6		P20338	RAB4A	0.339161		P29372	MPG	28		Q9Y2W2	WBP11	0.402035
Q9Y219	JAG2	6		O00391	QSOX1	0.338784		Q9C0C9	UBE2O	28		P35520	CBS	0.402035
Q96S86	HAPLN3	6		P17900	GM2A	0.338515		P53618	COPB1	27		P25788	PSMA3	0.401959
P36955	SERPINF1	6		Q6UWY0	ARSK	0.338515		P00338	LDHA	27		Q9P013	CWC15	0.401808
Q8NEZ5	FBXO22	6		O95631	NTN1	0.338247		Q15436	SEC23A	27		Q9UBF2	COPG2	0.401732
P53582	METAP1	6		O43405	COCH	0.337872		Q9H2G2	SLK	27		P51531	SMARCA2	0.401656
O94898	LRIG2	6		P17693	HLA-G	0.337605		Q9H3S7	PTPN23	27		Q9Y4Z0	LSM4	0.401581
P25391	LAMA1	6		Q9Y6M5	SLC30A1	0.337551		Q9ULU4	ZMYND8	27		Q9UKF6	CPSF3	0.401581
Q8WZA1	POMGNT1	6		P53582	METAP1	0.337285		Q8N4C8	MINK1	27		O43592	XPOT	0.40143
Q15417	CNN3	6		Q9BYC5	FUT8	0.337072		Q9BTC8	MTA3	27		P26640	VARS1	0.401354
Q9Y5P4	CERT1	6		P25325	MPST	0.336381		Q92878	RAD50	27		P43307	SSR1	0.401203
Q16651	PRSS8	6		Q9Y5P4	CERT1	0.336275		P49959	MRE11	27		O14497	ARID1A	0.401128
Q9Y6M5	SLC30A1	6		Q13361	MFAP5	0.336222		Q9P013	CWC15	27		Q15021	NCAPD2	0.401128
Q15223	NECTIN1	6		P15559	NQO1	0.336222		Q8TAA9	VANGL1	27		Q8NFC6	BOD1L1	0.401052
Q92824	PCSK5	6		P25391	LAMA1	0.336063		Q8N3E9	PLCD3	27		Q9HC35	EML4	0.400977
P07741	APRT	6		O43488	AKR7A2	0.335851		Q16539	MAPK14	27		P12277	CKB	0.400826
O43516	WIPF1	6		Q96S86	HAPLN3	0.335799		Q8TAF3	WDR48	27		P55769	SNU13	0.400751
P37837	TALDO1	6		Q09328	MGAT5	0.335746		Q8NBJ4	GOLM1	27		Q96ST3	SIN3A	0.400676
Q9NRN7	AASDHPPT	6		Q9Y6N7	ROBO1	0.335482		Q15363	TMED2	27		O60610	DIAPH1	0.400676
Q9H741	SPRING1	6		Q92729	PTPRU	0.334903		P15924	DSP	26		Q13144	EIF2B5	0.40045
O43529	CHST10	6		Q5T5P2	KIAA1217	0.33349		P08195	SLC3A2	26		Q96RS6	NUDCD1	0.400375
Q9Y2V2	CARHSP1	6		P41236	PPP1R2	0.333385		P53396	ACLY	26		Q9P2I0	CPSF2	0.400075
P49765	VEGFB	5		Q9UH65	SWAP70	0.333333		Q5VTR2	RNF20	26		P61457	PCBD1	0.400075
Q86Y38	XYLT1	5		Q8IWV2	CNTN4	0.333073		Q9P2J5	LARS1	26		Q96B26	EXOSC8	0.399625
P53602	MVD	5		Q8N543	OGFOD1	0.332865		P45880	VDAC2	26		P49720	PSMB3	0.399326
P31937	HIBADH	5		Q15223	NECTIN1	0.33271		P49411	TUFM	26		Q7Z3T8	ZFYVE16	0.399326
P54753	EPHB3	5		Q6H9L7	ISM2	0.332347		P42166	TMPO	26		O60508	CDC40	0.399252
A1X283	SH3PXD2B	5		Q86X76	NIT1	0.33214		Q99615	DNAJC7	26		Q9NW82	WDR70	0.398953
Q16537	PPP2R5E	5		Q8WZA0	LZIC	0.332088		O94973	AP2A2	26		Q99598	TSNAX	0.398879
Q9UN74	PCDHA4	5		Q96DB5	RMDN1	0.331264		Q15907	RAB11B	26		O60664	PLIN3	0.398729
P36969	GPX4	5		P20827	EFNA1	0.330596		Q9UKF6	CPSF3	26		P13796	LCP1	0.398729
Q9UH65	SWAP70	5		O60512	B4GALT3	0.330238		P08758	ANXA5	26		P62191	PSMC1	0.398655
O94903	PLPBP	5		Q96NY8	NECTIN4	0.330238		Q9BS26	ERP44	26		P53990	IST1	0.398655
Q5T6V5	QNG1	5		Q96KP4	CNDP2	0.329983		Q9UNS2	COPS3	26		Q12830	BPTF	0.398655
O94855	SEC24D	5		O60218	AKR1B10	0.329932		Q9ULR3	PPM1H	26		O15145	ARPC3	0.398581
P54687	BCAT1	5		Q9Y624	F11R	0.329881		Q13404	UBE2V1	26		Q9Y5K5	UCHL5	0.398506
P15121	AKR1B1	5		Q9UKM7	MAN1B1	0.329677		P48556	PSMD8	26		Q13257	MAD2L1	0.398432
Q6UY14	ADAMTSL4	5		Q9UK23	NAGPA	0.329474		P02794	FTH1	26		P50453	SERPINB9	0.398432
Q96IZ0	PAWR	5		P15692	VEGFA	0.329118		P61006	RAB8A	26		Q15370	ELOB	0.398357
Q15198	PDGFRL	5		O43278	SPINT1	0.328763		P99999	CYCS	26		O76003	GLRX3	0.398283
O94907	DKK1	5		P54687	BCAT1	0.328005		Q9Y639	NPTN	26		P09417	QDPR	0.398283
Q9Y624	F11R	5		Q86SF2	GALNT7	0.327652		P06733	ENO1	25		Q9UL46	PSME2	0.398134
O00548	DLL1	4		Q16651	PRSS8	0.32695		Q8WUM4	PDCD6IP	25		Q92609	TBC1D5	0.398134
Q9GZM7	TINAGL1	4		Q9BWP8	COLEC11	0.326649		Q99733	NAP1L4	25		P09493	TPM1	0.398134
P20827	EFNA1	4		Q96AY3	FKBP10	0.325702		P49321	NASP	25		Q96C19	EFHD2	0.398134
Q8WZA0	LZIC	4		Q6UY14	ADAMTSL4	0.325404		Q9UHR4	BAIAP2L1	25		Q96F07	CYFIP2	0.39806
Q9NRX4	PHPT1	4		Q9Y219	JAG2	0.324859		P43034	PAFAH1B1	25		P68036	UBE2L3	0.397986
O60218	AKR1B10	4		Q7Z5N4	SDK1	0.32481		P52565	ARHGDIA	25		P98172	EFNB1	0.397912
Q9UBX1	CTSF	4		Q92824	PCSK5	0.324464		Q9UBF2	COPG2	25		Q96D46	NMD3	0.397912
O43278	SPINT1	4		Q9P273	TENM3	0.324168		Q13144	EIF2B5	25		Q9P287	BCCIP	0.397837
P19021	PAM	4		Q15814	TBCC	0.324168		P61457	PCBD1	25		Q9UNF1	MAGED2	0.397763
Q9UKM7	MAN1B1	4		P52803	EFNA5	0.324119		Q9NW82	WDR70	25		P30622	CLIP1	0.397541
P23919	DTYMK	4		Q16537	PPP2R5E	0.323873		Q9UL46	PSME2	25		Q9NSE4	IARS2	0.397541
P62256	UBE2H	4		O43653	PSCA	0.32304		Q15276	RABEP1	25		Q03135	CAV1	0.397467
P15692	VEGFA	4		P53602	MVD	0.322454		O75396	SEC22B	25		Q7KZ85	SUPT6H	0.397467
Q9P273	TENM3	4		O94907	DKK1	0.321579		Q12972	PPP1R8	25		Q13011	ECH1	0.397319
P53384	NUBP1	4		O94903	PLPBP	0.321386		P53041	PPP5C	25		P50613	CDK7	0.397171
Q09328	MGAT5	4		Q15198	PDGFRL	0.321386		O15400	STX7	25		Q4KMP7	TBC1D10B	0.397097
Q96DB5	RMDN1	4		P14317	HCLS1	0.32124		Q15599	NHERF2	25		Q96FJ2	DYNLL2	0.397023
Q9GZN4	PRSS22	4		P31937	HIBADH	0.320709		Q9UHV9	PFDN2	25		Q9H074	PAIP1	0.397023
Q9UK23	NAGPA	4		Q16527	CSRP2	0.320324		Q16401	PSMD5	25		Q969S3	ZNF622	0.396949
P36871	PGM1	3		Q9UN74	PCDHA4	0.319652		P54259	ATN1	25		P09543	CNP	0.396876
P78417	GSTO1	3		Q9Y264	ANGPT4	0.318745		Q8N392	ARHGAP18	25		Q9Y333	LSM2	0.396728
Q8N543	OGFOD1	3		Q9BQT9	CLSTN3	0.318128		Q96ER3	SAAL1	25		O60841	EIF5B	0.396728
P21549	AGXT	3		Q04726	TLE3	0.318128		O00233	PSMD9	25		Q7Z6E9	RBBP6	0.396654
P55058	PLTP	3		Q8NCW6	GALNT11	0.318033		Q5T4S7	UBR4	24		Q9Y3B9	RRP15	0.396433
Q6UXH8	CCBE1	3		O95372	LYPLA2	0.317938		P07195	LDHB	24		P22102	GART	0.396433
Q7Z5N4	SDK1	3		Q9UBQ7	GRHPR	0.317465		Q5JTV8	TOR1AIP1	24		O43815	STRN	0.39636
Q04726	TLE3	3		Q96BJ3	AIDA	0.316899		P15927	RPA2	24		Q8WU90	ZC3H15	0.39636
Q9UKU6	TRHDE	3		Q969T9	WBP2	0.31657		Q8TEX9	IPO4	24		Q92820	GGH	0.396286
P41236	PPP1R2	3		Q9GZM7	TINAGL1	0.316242		Q969S3	ZNF622	24		Q06418	TYRO3	0.396286
Q96KP4	CNDP2	3		Q6UXH8	CCBE1	0.316148		O60841	EIF5B	24		P50851	LRBA	0.396212
Q96AY3	FKBP10	3		Q14766	LTBP1	0.316008		Q7Z6E9	RBBP6	24		P30040	ERP29	0.396212
Q9Y2H5	PLEKHA6	3		Q9Y696	CLIC4	0.315821		Q8NFA0	USP32	24		O75368	SH3BGRL	0.396139
Q9Y6N7	ROBO1	3		Q4G0F5	VPS26B	0.315354		Q9H4G0	EPB41L1	24		Q8TD19	NEK9	0.396139
Q5T5P2	KIAA1217	3		Q8WZA9	IRGQ	0.314749		O15511	ARPC5	24		Q9H8Y8	GORASP2	0.396065
O75071	EFCAB14	3		Q6PK18	OGFOD3	0.313133		Q27J81	INF2	24		Q15276	RABEP1	0.395992
P21291	CSRP1	3		Q9H7C9	AAMDC	0.311169		P16070	CD44	24		Q8WXA9	SREK1	0.395918
O95372	LYPLA2	3		Q9H741	SPRING1	0.3104		Q9ULJ7	ANKRD50	24		Q8TAA9	VANGL1	0.395918
O95394	PGM3	3		P48147	PREP	0.309545		Q13868	EXOSC2	24		P06396	GSN	0.395845
Q6PK18	OGFOD3	3		Q9H2E6	SEMA6A	0.3095		Q9NV70	EXOC1	24		O76071	CIAO1	0.395772
Q6YP21	KYAT3	3		Q86Y38	XYLT1	0.308872		Q15303	ERBB4	24		P62495	ETF1	0.395772
Q969T9	WBP2	3		O94898	LRIG2	0.308783		P54920	NAPA	24		Q96D71	REPS1	0.395772
Q15814	TBCC	3		P54753	EPHB3	0.308159		P01137	TGFB1	24		Q8NFA0	USP32	0.395625
Q8NCW6	GALNT11	3		P53384	NUBP1	0.30736		O75832	PSMD10	24		O75396	SEC22B	0.395551
Q9BWP8	COLEC11	3		Q9UBX1	CTSF	0.306038		Q92466	DDB2	24		O75531	BANF1	0.395551
Q6FIF0	ZFAND6	2		P49902	NT5C2	0.304988		Q92696	RABGGTA	24		P38117	ETFB	0.395551
Q6H9L7	ISM2	2		Q9UNI1	CELA1	0.304901		P35580	MYH10	23		P07954	FH	0.395405
Q96BJ3	AIDA	2		P55058	PLTP	0.304509		Q9H3P7	ACBD3	23		O43813	LANCL1	0.395405
Q13753	LAMC2	2		Q8WZA1	POMGNT1	0.303945		P60660	MYL6	23		Q9H4G0	EPB41L1	0.395258
Q16706	MAN2A1	2		Q6FIF0	ZFAND6	0.303815		O60763	USO1	23		Q04760	GLO1	0.395185
P15559	NQO1	2		Q16394	EXT1	0.302609		P13861	PRKAR2A	23		P09497	CLTB	0.395039
P50591	TNFSF10	2		Q9Y2H5	PLEKHA6	0.30154		P55196	AFDN	23		P08133	ANXA6	0.395039
Q9UIC8	LCMT1	2		P49765	VEGFB	0.300733		P67936	TPM4	23		P27105	STOM	0.394966
P49902	NT5C2	2		Q13753	LAMC2	0.29993		P30048	PRDX3	23		Q15293	RCN1	0.394966
P14543	NID1	2		Q5SRI9	MANEA	0.299677		Q99496	RNF2	23		P54764	EPHA4	0.394747
Q9H7C9	AAMDC	2		Q5SRE7	PHYHD1	0.297961		P18615	NELFE	23		P08758	ANXA5	0.394747
P48147	PREP	2		Q9H2A7	CXCL16	0.297629		P61201	COPS2	23		O60256	PRPSAP2	0.394601
P25325	MPST	2		Q8WVQ1	CANT1	0.297339		O14497	ARID1A	23		Q13526	PIN1	0.394528
Q01415	GALK2	2		O00244	ATOX1	0.294548		Q96B26	EXOSC8	23		P46939	UTRN	0.394528
Q9H2E6	SEMA6A	2		Q99447	PCYT2	0.294345		P53990	IST1	23		Q8N3E9	PLCD3	0.394382
P04085	PDGFA	2		Q08397	LOXL1	0.293858		O76003	GLRX3	23		P51572	BCAP31	0.394236
Q9UBQ6	EXTL2	2		P19021	PAM	0.293333		O75531	BANF1	23		P13804	ETFA	0.394236
Q8IWV2	CNTN4	2		O14562	UBFD1	0.293333		O00148	DDX39A	23		Q8TC07	TBC1D15	0.394163
Q96Q11	TRNT1	2		O43529	CHST10	0.29269		Q9BT78	COPS4	23		O43747	AP1G1	0.3938
Q99542	MMP19	2		Q9NPR2	SEMA4B	0.292489		Q92747	ARPC1A	23		O94979	SEC31A	0.393727
Q08397	LOXL1	2		Q96EU7	C1GALT1C1	0.291212		Q16513	PKN2	23		P31350	RRM2	0.393727
Q9H2A7	CXCL16	2		Q8N474	SFRP1	0.288106		Q9NP72	RAB18	23		P61019	RAB2A	0.393654
Q8WZA9	IRGQ	2		Q9GZN4	PRSS22	0.287562		Q2TAY7	SMU1	23		Q96J02	ITCH	0.393509
Q9UBQ7	GRHPR	2		Q9UIC8	LCMT1	0.286789		Q8NI27	THOC2	23		O75787	ATP6AP2	0.393437
Q9Y696	CLIC4	2		O00548	DLL1	0.283212		P23284	PPIB	23		Q8IWJ2	GCC2	0.393219
P51580	TPMT	2		Q8N806	UBR7	0.282014		P54709	ATP1B3	23		O15511	ARPC5	0.393147
Q9UNI1	CELA1	1		P04085	PDGFA	0.281939		Q4V328	GRIPAP1	23		Q8TBX8	PIP4K2C	0.393147
O75954	TSPAN9	1		Q5VWZ2	LYPLAL1	0.2809		P62310	LSM3	23		Q9UI10	EIF2B4	0.393147
Q5VWZ2	LYPLAL1	1		Q96AP7	ESAM	0.2809		P53985	SLC16A1	22		Q9BX40	LSM14B	0.393147
Q16527	CSRP2	1		Q9NYQ8	FAT2	0.279612		Q9BXS5	AP1M1	22		Q9BS26	ERP44	0.393074
Q86WR0	CCDC25	1		Q16706	MAN2A1	0.278408		Q3MHD2	LSM12	22		P49593	PPM1F	0.393074
O14562	UBFD1	1		Q01415	GALK2	0.276819		O75390	CS	22		O15084	ANKRD28	0.393002
O00244	ATOX1	1		P21549	AGXT	0.275284		Q99961	SH3GL1	22		Q27J81	INF2	0.392929
Q9NYQ8	FAT2	1		O75954	TSPAN9	0.275071		O95747	OXSR1	22		P60033	CD81	0.392785
Q99447	PCYT2	1		Q96Q11	TRNT1	0.269751		Q9HAV4	XPO5	22		P16070	CD44	0.392713
Q9Y274	ST3GAL6	1		Q96P44	COL21A1	0.269751		Q6IBS0	TWF2	22		P51665	PSMD7	0.39264
Q96P44	COL21A1	1		Q9UBQ6	EXTL2	0.268158		P04181	OAT	22		Q9P265	DIP2B	0.392568
P50238	CRIP1	1		Q9UKU6	TRHDE	0.264436		P35520	CBS	22		O00148	DDX39A	0.392496
Q8N806	UBR7	1		Q86WR0	CCDC25	0.260466		Q8NFC6	BOD1L1	22		Q9Y6W5	WASF2	0.392496
Q96AP7	ESAM	1		Q99542	MMP19	0.259106		Q96ST3	SIN3A	22		Q9UNN5	FAF1	0.392352
Q8N474	SFRP1	1		P23434	GCSH	0.251799		Q12830	BPTF	22		Q9BT78	COPS4	0.392279
O95633	FSTL3	1		P14543	NID1	0.247105		O60256	PRPSAP2	22		P00505	GOT2	0.392207
Q9NPR2	SEMA4B	1		P50238	CRIP1	0.244669		O75340	PDCD6	22		Q15102	PAFAH1B3	0.392135
P23434	GCSH	1		Q9Y274	ST3GAL6	0.244193		Q96QR8	PURB	22		P17858	PFKL	0.392063
P00813	ADA	1		O95633	FSTL3	0.242748		Q9UKS6	PACSIN3	22		P29350	PTPN6	0.391991
Q5SRE7	PHYHD1	1		P00813	ADA	0.23889		O00743	PPP6C	22		O75146	HIP1R	0.391775
P52823	STC1	N/A		P52823	STC1	N/A		Q9UQ13	SHOC2	22		P29372	MPG	0.391703
Q9BQR3	PRSS27	N/A		Q9BQR3	PRSS27	N/A		Q9H0E2	TOLLIP	22		O95251	KAT7	0.391631
P56747	CLDN6	N/A		P56747	CLDN6	N/A		Q9HD42	CHMP1A	22		P11233	RALA	0.391488
Q9ULC6	PADI1	N/A		Q9ULC6	PADI1	N/A		Q9H0X4	FAM234A	22		Q9Y3C6	PPIL1	0.391272
Q96A83	COL26A1	N/A		Q96A83	COL26A1	N/A		Q9Y3A3	MOB4	22		Q13610	PWP1	0.391272
P55001	MFAP2	N/A		P55001	MFAP2	N/A		Q01813	PFKP	21		Q5JVF3	PCID2	0.391201
Q09327	MGAT3	N/A		Q09327	MGAT3	N/A		Q9UPN3	MACF1	21		P14324	FDPS	0.391201
Q9BRK3	MXRA8	N/A		Q9BRK3	MXRA8	N/A		Q9C0C2	TNKS1BP1	21		P80723	BASP1	0.391129
P10109	FDX1	N/A		P10109	FDX1	N/A		P12268	IMPDH2	21		Q9UMX0	UBQLN1	0.391057
Q8TE59	ADAMTS19	N/A		Q8TE59	ADAMTS19	N/A		P52701	MSH6	21		Q92747	ARPC1A	0.390842
Q14563	SEMA3A	N/A		Q14563	SEMA3A	N/A		Q03252	LMNB2	21		Q8NE71	ABCF1	0.390842
Q5TFE4	NT5DC1	N/A		Q5TFE4	NT5DC1	N/A		Q13409	DYNC1I2	21		Q9NPF4	OSGEP	0.390771
Q9P2J2	IGSF9	N/A		Q9P2J2	IGSF9	N/A		Q96F07	CYFIP2	21		Q7Z434	MAVS	0.390771
P00746	CFD	N/A		P00746	CFD	N/A		Q8TD19	NEK9	21		P17813	ENG	0.390556
Q9P0S2	COX16	N/A		Q9P0S2	COX16	N/A		Q15293	RCN1	21		Q16513	PKN2	0.390413
Q9NPC4	A4GALT	N/A		Q9NPC4	A4GALT	N/A		Q8TBX8	PIP4K2C	21		Q9UNP9	PPIE	0.390342
								Q9UI10	EIF2B4	21		P20020	ATP2B1	0.390271
								Q01130	SRSF2	21		Q9H3Q1	CDC42EP4	0.389914
								O43818	RRP9	21		P35237	SERPINB6	0.389914
								Q2M2I8	AAK1	21		Q96DH6	MSI2	0.389487
								P12532	CKMT1B	21		P06730	EIF4E	0.389416
								Q9HAU5	UPF2	21		Q16539	MAPK14	0.389416
								P54725	RAD23A	21		Q01130	SRSF2	0.389345
								P07942	LAMB1	21		Q01973	ROR1	0.389274
								O43240	KLK10	21		Q15714	TSC22D1	0.389132
								Q9NWV8	BABAM1	21		Q9NP72	RAB18	0.389132
								Q00765	REEP5	21		O43818	RRP9	0.389132
								Q9H2J4	PDCL3	21		Q9UNS2	COPS3	0.389061
								P17812	CTPS1	20		Q92692	NECTIN2	0.389061
								Q7Z6Z7	HUWE1	20		Q14257	RCN2	0.389061
								Q8WXH0	SYNE2	20		Q9UNH7	SNX6	0.388848
								Q9Y2A7	NCKAP1	20		P60510	PPP4C	0.388778
								Q93008	USP9X	20		Q8WVY7	UBLCP1	0.388707
								P51659	HSD17B4	20		Q2TAY7	SMU1	0.388636
								Q15370	ELOB	20		Q96RT1	ERBIN	0.388494
								P46939	UTRN	20		Q96J01	THOC3	0.388494
								O95251	KAT7	20		P61106	RAB14	0.388424
								Q7Z434	MAVS	20		P49755	TMED10	0.388282
								Q9UNH7	SNX6	20		Q12972	PPP1R8	0.388282
								Q96RT1	ERBIN	20		Q96JB5	CDK5RAP3	0.388282
								P31483	TIA1	20		Q9Y6E0	STK24	0.388212
								O60826	CCDC22	20		Q9NR12	PDLIM7	0.388071
								Q12959	DLG1	20		Q6IN85	PPP4R3A	0.388071
								Q9UBC2	EPS15L1	20		Q9ULR3	PPM1H	0.387929
								P56545	CTBP2	20		P31483	TIA1	0.387788
								P61769	B2M	20		Q9UI12	ATP6V1H	0.387788
								Q92876	KLK6	20		Q02487	DSC2	0.387436
								Q13137	CALCOCO2	20		Q9BRK5	SDF4	0.387366
								Q4G148	GXYLT1	20		Q8NI27	THOC2	0.387296
								P28062	PSMB8	20		Q9GZZ9	UBA5	0.387155
								P40926	MDH2	19		Q2M2I8	AAK1	0.387155
								Q8TEM1	NUP210	19		Q9BTE3	MCMBP	0.387155
								P41250	GARS1	19		P06744	GPI	0.387015
								P30041	PRDX6	19		Q96TA1	NIBAN2	0.387015
								Q9HC35	EML4	19		O43237	DYNC1LI2	0.386945
								Q92609	TBC1D5	19		P51608	MECP2	0.386804
								P09493	TPM1	19		P35611	ADD1	0.386804
								Q9P287	BCCIP	19		Q12849	GRSF1	0.386804
								Q9BX40	LSM14B	19		Q6P1N0	CC2D1A	0.386734
								Q9H3Q1	CDC42EP4	19		Q8IZA0	KIAA0319L	0.386734
								Q96JB5	CDK5RAP3	19		P14735	IDE	0.386664
								P06744	GPI	19		Q13442	PDAP1	0.386594
								O00291	HIP1	19		Q13404	UBE2V1	0.386384
								O60216	RAD21	19		O75340	PDCD6	0.386384
								Q8IXH7	NELFCD	19		O14617	AP3D1	0.386384
								Q9UHY1	NRBP1	19		Q16698	DECR1	0.386244
								P35609	ACTN2	19		O60826	CCDC22	0.386174
								Q9UIA9	XPO7	19		P28072	PSMB6	0.386105
								O15127	SCAMP2	19		Q99719	SEPTIN5	0.386035
								P07384	CAPN1	19		P61086	UBE2K	0.386035
								Q15024	EXOSC7	19		P12532	CKMT1B	0.385965
								O15162	PLSCR1	19		Q96DG6	CMBL	0.385965
								Q9UNF0	PACSIN2	19		P22059	OSBP	0.385965
								Q96LA8	PRMT6	19		Q99543	DNAJC2	0.385895
								Q6P1M3	LLGL2	19		Q96KG9	SCYL1	0.385895
								Q9UBX5	FBLN5	19		O00273	DFFA	0.385338
								Q9H8W4	PLEKHF2	19		Q9BQ52	ELAC2	0.385268
								P14314	PRKCSH	18		Q96MW1	CCDC43	0.385268
								P54819	AK2	18		Q53SF7	COBLL1	0.385199
								O14828	SCAMP3	18		P54105	CLNS1A	0.384921
								P35659	DEK	18		Q9NZL4	HSPBP1	0.384851
								Q15021	NCAPD2	18		P62070	RRAS2	0.384505
								P12277	CKB	18		Q9C0C9	UBE2O	0.384435
								Q8WU90	ZC3H15	18		Q9HAU5	UPF2	0.384366
								P62495	ETF1	18		Q96QR8	PURB	0.384228
								Q96D71	REPS1	18		O00291	HIP1	0.384228
								O94979	SEC31A	18		P23284	PPIB	0.384089
								P49593	PPM1F	18		P21281	ATP6V1B2	0.384089
								Q13610	PWP1	18		Q9NX24	NHP2	0.383951
								Q96J01	THOC3	18		Q01650	SLC7A5	0.383951
								Q8N3U4	STAG2	18		P35573	AGL	0.383813
								P04062	GBA1	18		Q05655	PRKCD	0.383744
								Q9UJ70	NAGK	18		O60216	RAD21	0.383606
								O43924	PDE6D	18		Q6FI81	CIAPIN1	0.383606
								P02649	APOE	18		P53041	PPP5C	0.383537
								Q9GZT8	NIF3L1	18		P25787	PSMA2	0.383055
								Q96DA0	ZG16B	18		Q86Y82	STX12	0.383055
								P49356	FNTB	18		Q9NVJ2	ARL8B	0.383055
								P16383	GCFC2	18		O75116	ROCK2	0.383055
								P41208	CETN2	18		P54709	ATP1B3	0.382986
								Q9BRR6	ADPGK	18		Q8TAF3	WDR48	0.382918
								P29144	TPP2	17		Q8N3U4	STAG2	0.382918
								Q12768	WASHC5	17		Q12959	DLG1	0.38278
								Q9H3K6	BOLA2B	17		Q9BTT0	ANP32E	0.382574
								P60174	TPI1	17		Q5H9R7	PPP6R3	0.382574
								P29401	TKT	17		Q9UBC2	EPS15L1	0.382369
								Q9H4M9	EHD1	17		Q8N1G2	CMTR1	0.382026
								O43592	XPOT	17		P40925	MDH1	0.381958
								Q9UNF1	MAGED2	17		O15075	DCLK1	0.38189
								P13804	ETFA	17		Q9BT73	PSMG3	0.381685
								O43747	AP1G1	17		Q9BZZ5	API5	0.381685
								Q9UNN5	FAF1	17		O15446	POLR1G	0.381685
								P17858	PFKL	17		P48556	PSMD8	0.381617
								P80723	BASP1	17		Q96TC7	RMDN3	0.381548
								Q92692	NECTIN2	17		P55011	SLC12A2	0.38148
								Q99719	SEPTIN5	17		P28070	PSMB4	0.381276
								Q96DG6	CMBL	17		Q01433	AMPD2	0.381208
								Q9NVJ2	ARL8B	17		P25789	PSMA4	0.380935
								Q9BT73	PSMG3	17		O75391	SPAG7	0.380867
								Q02952	AKAP12	17		O15541	RNF113A	0.380731
								O15498	YKT6	17		P02794	FTH1	0.380392
								Q13098	GPS1	17		P01024	C3	0.380392
								Q9H2D6	TRIOBP	17		Q8IXH7	NELFCD	0.380324
								Q9Y570	PPME1	17		P50995	ANXA11	0.380324
								O94966	USP19	17		Q99523	SORT1	0.380257
								O75976	CPD	17		Q1ED39	KNOP1	0.379986
								Q9BVL2	NUP58	17		Q9UKS6	PACSIN3	0.379986
								P17655	CAPN2	17		P30533	LRPAP1	0.379918
								P15151	PVR	17		P23921	RRM1	0.37985
								O15230	LAMA5	17		Q06210	GFPT1	0.379783
								Q9H8J5	MANSC1	17		Q15018	ABRAXAS2	0.379648
								Q9BUR4	WRAP53	17		Q9P2R3	ANKFY1	0.379648
								Q9NU53	GINM1	17		Q9UBE0	SAE1	0.37958
								P49915	GMPS	16		O14672	ADAM10	0.379378
								P68036	UBE2L3	16		Q96PZ0	PUS7	0.379378
								Q8IWJ2	GCC2	16		A0MZ66	SHTN1	0.379378
								O75146	HIP1R	16		Q6WKZ4	RAB11FIP1	0.37931
								Q14257	RCN2	16		Q7L1Q6	BZW1	0.379243
								O43237	DYNC1LI2	16		O15400	STX7	0.379108
								P21281	ATP6V1B2	16		P50552	VASP	0.379108
								P30533	LRPAP1	16		O00161	SNAP23	0.379041
								Q15738	NSDHL	16		P20810	CAST	0.379041
								Q9Y6I3	EPN1	16		Q15599	NHERF2	0.378974
								P48735	IDH2	16		Q9NVA2	SEPTIN11	0.378906
								O43719	HTATSF1	16		Q02952	AKAP12	0.378839
								P11047	LAMC1	16		Q9UHY1	NRBP1	0.378705
								Q9Y5X3	SNX5	16		Q15738	NSDHL	0.378705
								Q12805	EFEMP1	16		P49184	DNASE1L1	0.378637
								Q92636	NSMAF	16		Q9UHV9	PFDN2	0.37857
								O95274	LYPD3	16		Q9ULJ7	ANKRD50	0.378503
								O43633	CHMP2A	16		P98160	HSPG2	0.378235
								P09758	TACSTD2	16		P55786	NPEPPS	0.378235
								P18669	PGAM1	15		P61006	RAB8A	0.378168
								P26640	VARS1	15		O15498	YKT6	0.378101
								Q9NSE4	IARS2	15		Q5T1M5	FKBP15	0.377967
								Q9P265	DIP2B	15		Q9Y6I3	EPN1	0.377833
								Q9Y6W5	WASF2	15		P56545	CTBP2	0.377766
								P00505	GOT2	15		P35609	ACTN2	0.377699
								Q15102	PAFAH1B3	15		P04062	GBA1	0.377565
								Q9UI12	ATP6V1H	15		Q15477	SKIC2	0.377565
								Q02487	DSC2	15		Q9BQ70	TCF25	0.377298
								Q9BRK5	SDF4	15		Q16401	PSMD5	0.377232
								P62070	RRAS2	15		P61769	B2M	0.377032
								Q05655	PRKCD	15		P54577	YARS1	0.376699
								O75116	ROCK2	15		Q9UIA9	XPO7	0.376566
								O15075	DCLK1	15		P99999	CYCS	0.3765
								Q9BZZ5	API5	15		Q9NP97	DYNLRB1	0.376234
								P55011	SLC12A2	15		P24666	ACP1	0.376168
								Q01433	AMPD2	15		Q9UPU5	USP24	0.37577
								P01024	C3	15		Q9NQX3	GPHN	0.375638
								Q9UBE0	SAE1	15		Q9UJ70	NAGK	0.375572
								Q96PZ0	PUS7	15		Q15833	STXBP2	0.375572
								P50552	VASP	15		O43768	ENSA	0.375506
								Q15477	SKIC2	15		P11117	ACP2	0.375506
								P08779	KRT16	15		Q13868	EXOSC2	0.37544
								Q14789	GOLGB1	15		Q9BZI7	UPF3B	0.375374
								Q9UBQ0	VPS29	15		Q9UHD9	UBQLN2	0.375308
								P08648	ITGA5	15		Q5T0W9	FAM83B	0.375176
								P55268	LAMB2	15		Q9NY27	PPP4R2	0.37511
								P23229	ITGA6	15		Q9NV70	EXOC1	0.37511
								O00461	GOLIM4	15		P30740	SERPINB1	0.374978
								P06756	ITGAV	15		Q13098	GPS1	0.374912
								P23634	ATP2B4	15		Q9NXG2	THUMPD1	0.374846
								Q12913	PTPRJ	15		Q15262	PTPRK	0.37478
								P01011	SERPINA3	15		Q15303	ERBB4	0.37478
								P01130	LDLR	15		Q12929	EPS8	0.374517
								Q92599	SEPTIN8	15		Q5VZK9	CARMIL1	0.374386
								O75581	LRP6	15		Q9H2D6	TRIOBP	0.374255
								O15031	PLXNB2	15		Q53H96	PYCR3	0.374058
								Q9NXU5	ARL15	15		P54725	RAD23A	0.37373
								Q14696	MESD	15		Q13867	BLMH	0.373665
								Q08345	DDR1	15		Q9BXB1	LGR4	0.373665
								Q9UF33	EPHA6	15		P61026	RAB10	0.373599
								Q99439	CNN2	14		P28838	LAP3	0.373469
								Q9NU22	MDN1	14		P08779	KRT16	0.373403
								Q13564	NAE1	14		Q52LJ0	FAM98B	0.373077
								Q7Z3T8	ZFYVE16	14		Q68EM7	ARHGAP17	0.373012
								O60664	PLIN3	14		P16435	POR	0.372947
								P50453	SERPINB9	14		Q8WVJ2	NUDCD2	0.372947
								Q96D46	NMD3	14		Q9Y570	PPME1	0.372816
								P22102	GART	14		Q01581	HMGCS1	0.372686
								P50851	LRBA	14		O00743	PPP6C	0.372621
								P08133	ANXA6	14		O43583	DENR	0.372491
								Q8TC07	TBC1D15	14		Q14789	GOLGB1	0.372426
								Q5JVF3	PCID2	14		P48735	IDH2	0.372361
								Q6P1N0	CC2D1A	14		Q99536	VAT1	0.372361
								Q16698	DECR1	14		Q04695	KRT17	0.372231
								P61086	UBE2K	14		Q4V328	GRIPAP1	0.372036
								Q9NX24	NHP2	14		O15127	SCAMP2	0.372036
								Q9BTT0	ANP32E	14		P08253	MMP2	0.371971
								O15446	POLR1G	14		P04632	CAPNS1	0.371971
								Q96TC7	RMDN3	14		Q9H2C0	GAN	0.371971
								P50995	ANXA11	14		P08754	GNAI3	0.371648
								Q9NVA2	SEPTIN11	14		Q8NC42	RNF149	0.371518
								Q12929	EPS8	14		P15586	GNS	0.371453
								Q53H96	PYCR3	14		O43719	HTATSF1	0.371389
								P16435	POR	14		Q92876	KLK6	0.37126
								P08253	MMP2	14		P07384	CAPN1	0.371066
								Q92783	STAM	14		O43924	PDE6D	0.370937
								O75131	CPNE3	14		Q14192	FHL2	0.370744
								Q96EE3	SEH1L	14		Q13428	TCOF1	0.370615
								Q9UPT5	EXOC7	14		P26006	ITGA3	0.370486
								Q96AC1	FERMT2	14		Q9NY97	B3GNT2	0.370422
								Q96MX6	DNAAF10	14		Q9NZT1	CALML5	0.370229
								P06737	PYGL	14		P61764	STXBP1	0.370036
								Q9BYG5	PARD6B	14		Q92783	STAM	0.369908
								P53611	RABGGTB	14		Q8TBC4	UBA3	0.369716
								P23458	JAK1	14		Q15024	EXOSC7	0.369396
								P47929	LGALS7B	14		P13646	KRT13	0.369396
								Q9BZE9	ASPSCR1	14		Q01469	FABP5	0.369396
								O60911	CTSV	14		Q9Y617	PSAT1	0.369332
								P61970	NUTF2	14		O60568	PLOD3	0.369332
								Q676U5	ATG16L1	14		Q99707	MTR	0.369332
								Q15435	PPP1R7	14		O75131	CPNE3	0.369268
								P12110	COL6A2	14		P04259	KRT6B	0.369268
								O14530	TXNDC9	14		Q6UWP8	SBSN	0.369204
								Q6UWB1	IL27RA	14		P00491	PNP	0.36914
								O60610	DIAPH1	13		Q32MZ4	LRRFIP1	0.369076
								P13796	LCP1	13		Q96EE3	SEH1L	0.369013
								Q4KMP7	TBC1D10B	13		P11216	PYGB	0.369013
								P09543	CNP	13		P30566	ADSL	0.369013
								P38117	ETFB	13		Q9BWJ5	SF3B5	0.368949
								P31350	RRM2	13		P20340	RAB6A	0.368758
								P20020	ATP2B1	13		Q9UQ13	SHOC2	0.368694
								Q96DH6	MSI2	13		P78346	RPP30	0.36863
								Q9BTE3	MCMBP	13		Q13112	CHAF1B	0.368439
								P35611	ADD1	13		O15162	PLSCR1	0.368312
								Q12849	GRSF1	13		Q8NFW8	CMAS	0.368312
								Q6FI81	CIAPIN1	13		P54920	NAPA	0.368185
								O15541	RNF113A	13		P04080	CSTB	0.368121
								P23921	RRM1	13		O15394	NCAM2	0.367931
								O00161	SNAP23	13		Q5JSH3	WDR44	0.367868
								P20810	CAST	13		P07942	LAMB1	0.367804
								Q5T1M5	FKBP15	13		Q13137	CALCOCO2	0.367551
								Q9BQ70	TCF25	13		Q9UBV7	B4GALT7	0.367424
								O43768	ENSA	13		P11047	LAMC1	0.367171
								Q9BZI7	UPF3B	13		P11766	ADH5	0.366919
								P08754	GNAI3	13		Q9UNF0	PACSIN2	0.366856
								Q13428	TCOF1	13		P48507	GCLM	0.366793
								P36952	SERPINB5	13		Q9UPT5	EXOC7	0.366667
								Q9P2K2	TXNDC16	13		Q9HB07	MYG1	0.366667
								Q15382	RHEB	13		Q99757	TXN2	0.366415
								O14786	NRP1	13		O75351	VPS4B	0.366226
								O94880	PHF14	13		O43240	KLK10	0.366163
								P09668	CTSH	13		Q9BVG4	PBDC1	0.365975
								P51693	APLP1	13		Q8NBJ4	GOLM1	0.365787
								O95865	DDAH2	13		Q99436	PSMB7	0.365661
								P21579	SYT1	13		P01137	TGFB1	0.365599
								O43291	SPINT2	13		Q16775	HAGH	0.365474
								P33151	CDH5	13		Q9H0E2	TOLLIP	0.365411
								O15496	PLA2G10	13		P36952	SERPINB5	0.365286
								P11234	RALB	13		Q9BXS6	NUSAP1	0.365286
								P26374	CHML	13		P02649	APOE	0.365223
								Q15274	QPRT	13		Q9GZT8	NIF3L1	0.365036
								Q06546	GABPA	13		Q96AC1	FERMT2	0.364599
								Q96C19	EFHD2	12		Q9UBQ0	VPS29	0.364537
								P30040	ERP29	12		P08648	ITGA5	0.364475
								P07954	FH	12		Q9Y5X3	SNX5	0.36435
								O43813	LANCL1	12		Q9BTY2	FUCA2	0.36435
								P11233	RALA	12		Q9NWV8	BABAM1	0.363977
								P14324	FDPS	12		O94966	USP19	0.363977
								Q96TA1	NIBAN2	12		P55268	LAMB2	0.363977
								O14617	AP3D1	12		Q6P4Q7	CNNM4	0.363605
								P22059	OSBP	12		P48059	LIMS1	0.36342
								Q53SF7	COBLL1	12		Q99471	PFDN5	0.363234
								Q6WKZ4	RAB11FIP1	12		O75832	PSMD10	0.363172
								P98160	HSPG2	12		P23229	ITGA6	0.363049
								Q9NP97	DYNLRB1	12		Q9H6S3	EPS8L2	0.363049
								Q13867	BLMH	12		Q9NY33	DPP3	0.363049
								P61026	RAB10	12		O75882	ATRN	0.362987
								O43583	DENR	12		O00461	GOLIM4	0.362925
								P26006	ITGA3	12		P62310	LSM3	0.362678
								Q9NZT1	CALML5	12		Q16851	UGP2	0.362678
								Q9Y617	PSAT1	12		Q96BW5	PTER	0.362555
								O60568	PLOD3	12		P06756	ITGAV	0.362494
								Q8NFW8	CMAS	12		Q658Y4	FAM91A1	0.362494
								Q9UBV7	B4GALT7	12		P40123	CAP2	0.362432
								P48059	LIMS1	12		Q2M389	WASHC4	0.362432
								Q658Y4	FAM91A1	12		Q9UMY4	SNX12	0.362186
								Q15631	TSN	12		Q9HD42	CHMP1A	0.362002
								O95994	AGR2	12		Q92466	DDB2	0.36194
								Q07960	ARHGAP1	12		Q15631	TSN	0.361756
								Q9GZL7	WDR12	12		Q9P2K2	TXNDC16	0.361634
								Q86YM7	HOMER1	12		O75487	GPC4	0.361634
								Q66K74	MAP1S	12		Q4G148	GXYLT1	0.361327
								Q9H9T3	ELP3	12		P23634	ATP2B4	0.361266
								P02538	KRT6A	12		Q96FX7	TRMT61A	0.361266
								Q9BVK6	TMED9	12		Q99614	TTC1	0.361205
								Q14344	GNA13	12		O75976	CPD	0.361144
								Q6UXH1	CRELD2	12		P13987	CD59	0.361144
								Q13232	NME3	12		O75663	TIPRL	0.360717
								Q6AI08	HEATR6	12		O95994	AGR2	0.360656
								P48509	CD151	12		O00193	SMAP	0.360534
								P18084	ITGB5	12		Q07960	ARHGAP1	0.36029
								P78536	ADAM17	12		Q96MX6	DNAAF10	0.36023
								Q9H9E3	COG4	12		O75909	CCNK	0.36023
								Q24JP5	TMEM132A	12		Q12913	PTPRJ	0.360169
								Q7Z7H5	TMED4	12		P62328	TMSB4X	0.359926
								Q13228	SELENBP1	12		Q15382	RHEB	0.359501
								O75695	RP2	12		P07686	HEXB	0.359441
								O75843	AP1G2	12		P55957	BID	0.35932
								Q04760	GLO1	11		P06737	PYGL	0.359138
								Q96J02	ITCH	11		Q9Y5S2	CDC42BPB	0.359138
								Q8NE71	ABCF1	11		Q96LA8	PRMT6	0.359078
								Q01650	SLC7A5	11		Q9NXR7	BABAM2	0.359078
								P35573	AGL	11		Q9GZL7	WDR12	0.359017
								O75391	SPAG7	11		Q9UJC5	SH3BGRL2	0.358776
								P54577	YARS1	11		P51687	SUOX	0.358475
								Q9UPU5	USP24	11		Q6P1M3	LLGL2	0.358354
								P11117	ACP2	11		Q86YM7	HOMER1	0.358054
								Q8WVJ2	NUDCD2	11		Q66K74	MAP1S	0.358054
								P04632	CAPNS1	11		Q9NRW7	VPS45	0.357814
								P61764	STXBP1	11		Q9BYG5	PARD6B	0.357754
								Q8TBC4	UBA3	11		Q99828	CIB1	0.357754
								P13646	KRT13	11		Q96ME1	FBXL18	0.357754
								P04259	KRT6B	11		Q9H9T3	ELP3	0.357634
								Q6UWP8	SBSN	11		P13473	LAMP2	0.357634
								Q5JSH3	WDR44	11		Q9BVL2	NUP58	0.357574
								Q96FX7	TRMT61A	11		Q9UK76	JPT1	0.357514
								Q99614	TTC1	11		Q15363	TMED2	0.357454
								P07686	HEXB	11		P53611	RABGGTB	0.357454
								Q9NRW7	VPS45	11		P02538	KRT6A	0.357095
								Q13444	ADAM15	11		P23458	JAK1	0.356737
								Q96BP3	PPWD1	11		Q9BXS4	TMEM59	0.356558
								P00738	HP	11		Q13444	ADAM15	0.356498
								Q9NRB3	CHST12	11		Q96BP3	PPWD1	0.356498
								Q13439	GOLGA4	11		Q8NBS9	TXNDC5	0.356439
								Q13685	AAMP	11		Q96DA0	ZG16B	0.356379
								Q9BV40	VAMP8	11		O14786	NRP1	0.35632
								P34059	GALNS	11		P17655	CAPN2	0.356201
								Q92520	FAM3C	11		O94880	PHF14	0.356201
								Q9NV96	TMEM30A	11		P00738	HP	0.356142
								P52799	EFNB2	11		P48200	IREB2	0.356142
								Q9P0V9	SEPTIN10	11		P01011	SERPINA3	0.355845
								O95376	ARIH2	11		O94887	FARP2	0.355845
								Q9BT09	CNPY3	11		Q9NRJ7	PCDHB16	0.355845
								Q9NP79	VTA1	11		P15151	PVR	0.355548
								Q9Y3D6	FIS1	11		Q12805	EFEMP1	0.355548
								Q8WV99	ZFAND2B	11		Q9UK59	DBR1	0.355548
								Q9H5N1	RABEP2	11		Q9BVK6	TMED9	0.355489
								O94766	B3GAT3	11		Q15286	RAB35	0.355489
								Q8IZA0	KIAA0319L	10		P51970	NDUFA8	0.35543
								P14735	IDE	10		Q13362	PPP2R5C	0.355075
								Q13442	PDAP1	10		P60983	GMFB	0.354957
								O00273	DFFA	10		P49903	SEPHS1	0.354839
								Q5T0W9	FAM83B	10		P25208	NFYB	0.354721
								Q52LJ0	FAM98B	10		P01130	LDLR	0.354662
								Q01469	FABP5	10		P12081	HARS1	0.354485
								P00491	PNP	10		P54259	ATN1	0.354132
								P11216	PYGB	10		P01019	AGT	0.354132
								P20340	RAB6A	10		P04066	FUCA1	0.354073
								P78346	RPP30	10		Q8ND24	RNF214	0.354073
								Q13112	CHAF1B	10		Q92599	SEPTIN8	0.354015
								O75351	VPS4B	10		Q9UBX5	FBLN5	0.353839
								Q9BXS6	NUSAP1	10		P09486	SPARC	0.35378
								O75882	ATRN	10		Q9H0X4	FAM234A	0.353721
								Q9NXR7	BABAM2	10		P09668	CTSH	0.353663
								Q15286	RAB35	10		P47929	LGALS7B	0.353604
								O15020	SPTBN2	10		P51693	APLP1	0.353604
								Q4LE39	ARID4B	10		O15020	SPTBN2	0.353545
								P35052	GPC1	10		O95865	DDAH2	0.353487
								Q9Y6Q5	AP1M2	10		Q14344	GNA13	0.353428
								P13807	GYS1	10		O95359	TACC2	0.353428
								Q16625	OCLN	10		P15941	MUC1	0.353311
								Q96K17	BTF3L4	10		Q00765	REEP5	0.353253
								O60513	B4GALT4	10		Q92743	HTRA1	0.353136
								O15460	P4HA2	10		O75581	LRP6	0.353019
								O15232	MATN3	10		Q9NRB3	CHST12	0.352902
								P17301	ITGA2	10		O15230	LAMA5	0.352844
								P20908	COL5A1	10		Q6UXH1	CRELD2	0.352786
								P01009	SERPINA1	10		Q9UGI8	TES	0.352786
								O75496	GMNN	10		Q92696	RABGGTA	0.352669
								Q96CS7	PLEKHB2	10		O15031	PLXNB2	0.352611
								O75051	PLXNA2	10		Q4LE39	ARID4B	0.352611
								P18850	ATF6	10		Q9Y3A3	MOB4	0.352436
								Q14139	UBE4A	10		Q9NXU5	ARL15	0.35232
								Q96TA2	YME1L1	10		P35052	GPC1	0.352203
								O60645	EXOC3	10		Q9H8W4	PLEKHF2	0.352145
								P09417	QDPR	9		P49356	FNTB	0.352029
								Q9BQ52	ELAC2	9		P16383	GCFC2	0.351971
								Q96MW1	CCDC43	9		Q9ULA0	DNPEP	0.351913
								Q5H9R7	PPP6R3	9		P36639	NUDT1	0.351913
								A0MZ66	SHTN1	9		P18858	LIG1	0.351623
								P24666	ACP1	9		P80303	NUCB2	0.351391
								P28838	LAP3	9		Q92636	NSMAF	0.351334
								Q04695	KRT17	9		Q8N392	ARHGAP18	0.351276
								Q9H2C0	GAN	9		Q99808	SLC29A1	0.351276
								P15586	GNS	9		Q92575	UBXN4	0.351045
								Q99707	MTR	9		P07951	TPM2	0.351045
								Q32MZ4	LRRFIP1	9		P07602	PSAP	0.351045
								P30566	ADSL	9		P41208	CETN2	0.350756
								Q99757	TXN2	9		Q13232	NME3	0.350756
								Q16775	HAGH	9		Q6AI08	HEATR6	0.350583
								Q16851	UGP2	9		P24588	AKAP5	0.350583
								P40123	CAP2	9		P20645	M6PR	0.350583
								O75487	GPC4	9		P48509	CD151	0.350411
								P13987	CD59	9		O15231	ZNF185	0.350411
								O75909	CCNK	9		O75818	RPP40	0.350353
								P55957	BID	9		Q99650	OSMR	0.350066
								P13473	LAMP2	9		Q13439	GOLGA4	0.349951
								O94887	FARP2	9		P40121	CAPG	0.349721
								Q13362	PPP2R5C	9		Q9Y6Q5	AP1M2	0.349664
								Q92575	UBXN4	9		P13807	GYS1	0.349607
								P07951	TPM2	9		P48637	GSS	0.349607
								P24588	AKAP5	9		Q9H2J4	PDCL3	0.34955
								O75818	RPP40	9		Q9NWV4	CZIB	0.34955
								Q99650	OSMR	9		P09525	ANXA4	0.349492
								Q15172	PPP2R5A	9		Q99829	CPNE1	0.349378
								O14907	TAX1BP3	9		P51688	SGSH	0.349321
								Q8WX93	PALLD	9		P21579	SYT1	0.349149
								P62745	RHOB	9		Q9BYZ2	LDHAL6B	0.349149
								Q03154	ACY1	9		Q14696	MESD	0.349035
								O60502	OGA	9		Q15172	PPP2R5A	0.349035
								Q9NT62	ATG3	9		Q9HAV0	GNB4	0.349035
								Q7LBR1	CHMP1B	9		O60437	PPL	0.349035
								Q8NFJ5	GPRC5A	9		P63096	GNAI1	0.348978
								Q7LG56	RRM2B	9		Q13685	AAMP	0.348921
								Q8NBI6	XXYLT1	9		P62942	FKBP1A	0.348636
								Q14508	WFDC2	9		Q16625	OCLN	0.348579
								Q8NCL4	GALNT6	9		Q96K17	BTF3L4	0.348579
								P05362	ICAM1	9		Q15404	RSU1	0.348522
								P49862	KLK7	9		P19883	FST	0.348351
								Q4J6C6	PREPL	9		Q969H8	MYDGF	0.348294
								Q8NBK3	SUMF1	9		Q8IV08	PLD3	0.348294
								O43657	TSPAN6	9		O14907	TAX1BP3	0.348067
								Q5JS37	NHLRC3	9		Q96T51	RUFY1	0.347897
								Q11206	ST3GAL4	9		P18084	ITGB5	0.347557
								P35237	SERPINB6	8		Q8NCW5	NAXE	0.347557
								P40925	MDH1	8		Q9BZE9	ASPSCR1	0.3475
								Q9P2R3	ANKFY1	8		O95274	LYPD3	0.347444
								Q7L1Q6	BZW1	8		Q9BV40	VAMP8	0.347444
								Q9NQX3	GPHN	8		Q8WX93	PALLD	0.347444
								Q9NXG2	THUMPD1	8		O43291	SPINT2	0.347331
								Q01581	HMGCS1	8		Q08345	DDR1	0.347274
								Q9H6S3	EPS8L2	8		P23470	PTPRG	0.347274
								Q2M389	WASHC4	8		O60911	CTSV	0.347218
								Q9UMY4	SNX12	8		Q9BUL8	PDCD10	0.347048
								O00193	SMAP	8		P42357	HAL	0.346935
								P62328	TMSB4X	8		Q9Y639	NPTN	0.346879
								Q9ULA0	DNPEP	8		Q9H8M7	MINDY3	0.346879
								P36639	NUDT1	8		P78536	ADAM17	0.346823
								P80303	NUCB2	8		Q9NPH2	ISYNA1	0.346823
								P51688	SGSH	8		Q9UF33	EPHA6	0.346429
								Q9BYZ2	LDHAL6B	8		P62745	RHOB	0.34626
								Q9HAV0	GNB4	8		P61970	NUTF2	0.346148
								O60437	PPL	8		Q9H9E3	COG4	0.346035
								P62942	FKBP1A	8		P55210	CASP7	0.345979
								Q969H8	MYDGF	8		Q24JP5	TMEM132A	0.345867
								P23470	PTPRG	8		O43633	CHMP2A	0.345699
								Q9BUL8	PDCD10	8		P33151	CDH5	0.345587
								P42357	HAL	8		O95861	BPNT1	0.345587
								Q9BTT6	LRRC1	8		Q9H8J5	MANSC1	0.345531
								P49005	POLD2	8		P34059	GALNS	0.345531
								P14780	MMP9	8		P49189	ALDH9A1	0.345531
								Q9H832	UBE2Z	8		Q96RE7	NACC1	0.345475
								P36941	LTBR	8		Q9BTT6	LRRC1	0.345363
								Q9ULC4	MCTS1	8		O60513	B4GALT4	0.345196
								Q13740	ALCAM	8		Q9BUR4	WRAP53	0.34514
								Q9NTJ4	MAN2C1	8		O15496	PLA2G10	0.34514
								Q8TB96	ITFG1	8		P35556	FBN2	0.345084
								Q9BUH6	PAXX	8		P49005	POLD2	0.345028
								P51808	DYNLT3	8		O15305	PMM2	0.345028
								Q93063	EXT2	8		P12035	KRT3	0.344973
								Q96HD1	CRELD1	8		Q7Z7H5	TMED4	0.344917
								Q8NG11	TSPAN14	8		O15460	P4HA2	0.344694
								Q495W5	FUT11	8		P16870	CPE	0.34436
								Q9NZ53	PODXL2	8		Q92520	FAM3C	0.344305
								O43286	B4GALT5	8		P14780	MMP9	0.344305
								Q14746	COG2	8		Q96ER3	SAAL1	0.344027
								Q5MNZ6	WDR45B	8		Q03154	ACY1	0.343972
								Q8N1G2	CMTR1	7		Q9H832	UBE2Z	0.343972
								Q06210	GFPT1	7		Q6NVY1	HIBCH	0.343916
								P55786	NPEPPS	7		P06280	GLA	0.343861
								Q68EM7	ARHGAP17	7		O60502	OGA	0.343695
								Q99536	VAT1	7		Q9NV96	TMEM30A	0.343473
								P04080	CSTB	7		P52799	EFNB2	0.343363
								O75663	TIPRL	7		O14773	TPP1	0.343197
								Q9Y5S2	CDC42BPB	7		Q08554	DSC1	0.343197
								P51687	SUOX	7		O00233	PSMD9	0.343032
								Q99828	CIB1	7		P36941	LTBR	0.342977
								Q9UK76	JPT1	7		Q8IYB7	DIS3L2	0.342921
								Q8NBS9	TXNDC5	7		Q13228	SELENBP1	0.342866
								P48200	IREB2	7		Q9NT62	ATG3	0.342811
								Q9NRJ7	PCDHB16	7		P14550	AKR1A1	0.342701
								P01019	AGT	7		Q92485	SMPDL3B	0.342701
								P04066	FUCA1	7		Q5VW32	BROX	0.342536
								O95359	TACC2	7		O15232	MATN3	0.342481
								Q92743	HTRA1	7		O60888	CUTA	0.342426
								P63096	GNAI1	7		Q9P0V9	SEPTIN10	0.342261
								P19883	FST	7		Q9NU53	GINM1	0.342207
								P23469	PTPRE	7		P17301	ITGA2	0.342042
								P60903	S100A10	7		P23469	PTPRE	0.341932
								P23443	RPS6KB1	7		Q5TZA2	CROCC	0.341878
								O95881	TXNDC12	7		P60903	S100A10	0.341823
								Q6IA86	ELP2	7		P20908	COL5A1	0.341768
								P40189	IL6ST	7		P16422	EPCAM	0.341768
								O00423	EML1	7		O75695	RP2	0.341713
								Q9NUW8	TDP1	7		Q9H910	JPT2	0.341495
								Q7Z7M0	MEGF8	7		Q08722	CD47	0.34144
								Q6IA69	NADSYN1	7		Q9UJJ9	GNPTG	0.341385
								P50452	SERPINB8	7		P01009	SERPINA1	0.341331
								Q14703	MBTPS1	7		Q9ULC4	MCTS1	0.341222
								P52788	SMS	7		Q96S97	MYADM	0.341222
								Q8N441	FGFRL1	7		P23443	RPS6KB1	0.341167
								Q9Y4D1	DAAM1	7		P11234	RALB	0.341113
								Q8NES3	LFNG	7		Q7LBR1	CHMP1B	0.341004
								P15309	ACP3	7		O95376	ARIH2	0.340895
								Q9BZR6	RTN4R	7		Q8NFJ5	GPRC5A	0.340895
								O00468	AGRN	7		Q13214	SEMA3B	0.340895
								P78504	JAG1	7		O75496	GMNN	0.34084
								Q8NBJ7	SUMF2	7		Q13740	ALCAM	0.340677
								P13284	IFI30	7		O95881	TXNDC12	0.340568
								P50148	GNAQ	7		Q6IA86	ELP2	0.340459
								P05121	SERPINE1	7		Q96JC1	VPS39	0.340351
								Q8NCH0	CHST14	7		P52569	SLC7A2	0.340351
								Q9NUQ3	TXLNG	7		P40189	IL6ST	0.340242
								P78325	ADAM8	7		P00918	CA2	0.340188
								Q08431	MFGE8	7		O75843	AP1G2	0.340134
								Q14802	FXYD3	7		Q9NUY8	TBC1D23	0.34008
								Q9NQ84	GPRC5C	7		Q96CS7	PLEKHB2	0.340025
								Q86VP1	TAX1BP1	7		Q96FQ6	S100A16	0.339917
								Q66K14	TBC1D9B	7		Q9BT09	CNPY3	0.339701
								Q68CQ7	GLT8D1	7		P06865	HEXA	0.339701
								Q9BZM4	ULBP3	7		O75051	PLXNA2	0.339539
								Q03167	TGFBR3	7		P01215	CGA	0.339377
								Q15833	STXBP2	6		Q92954	PRG4	0.339377
								Q5VZK9	CARMIL1	6		Q7LG56	RRM2B	0.339269
								Q9BXB1	LGR4	6		O00423	EML1	0.339161
								O15394	NCAM2	6		Q9NUW8	TDP1	0.339107
								Q9BTY2	FUCA2	6		Q8NBI6	XXYLT1	0.338838
								Q6P4Q7	CNNM4	6		Q8IVM0	CCDC50	0.338838
								Q96BW5	PTER	6		P29083	GTF2E1	0.338838
								Q8ND24	RNF214	6		Q9NP79	VTA1	0.338623
								Q9UGI8	TES	6		P09758	TACSTD2	0.338408
								Q99808	SLC29A1	6		Q9NS15	LTBP3	0.338247
								P07602	PSAP	6		Q9NTJ4	MAN2C1	0.338193
								P20645	M6PR	6		Q7Z7M0	MEGF8	0.337979
								P09525	ANXA4	6		P26374	CHML	0.337819
								Q15404	RSU1	6		Q07812	BAX	0.337819
								Q8IV08	PLD3	6		Q676U5	ATG16L1	0.337765
								Q9H8M7	MINDY3	6		Q15435	PPP1R7	0.337658
								P55210	CASP7	6		Q8TB96	ITFG1	0.337658
								O95861	BPNT1	6		Q6IA69	NADSYN1	0.337658
								Q96RE7	NACC1	6		P12110	COL6A2	0.337498
								P16870	CPE	6		P26885	FKBP2	0.337445
								P06280	GLA	6		P50452	SERPINB8	0.337391
								Q5VW32	BROX	6		Q6ZMP0	THSD4	0.337338
								Q5TZA2	CROCC	6		O14530	TXNDC9	0.337231
								P16422	EPCAM	6		Q9BWS9	CHID1	0.337178
								Q13214	SEMA3B	6		Q14508	WFDC2	0.337125
								Q9NS15	LTBP3	6		Q8WW59	SPRYD4	0.337072
								Q07812	BAX	6		P07738	BPGM	0.337018
								Q96PD2	DCBLD2	6		P18850	ATF6	0.336965
								P22307	SCP2	6		O43847	NRDC	0.336859
								P09601	HMOX1	6		Q8NCF5	NFATC2IP	0.336699
								O60927	PPP1R11	6		Q14703	MBTPS1	0.336646
								Q01970	PLCB3	6		P46926	GNPDA1	0.336593
								Q8NB37	GATD1	6		Q9Y3D6	FIS1	0.33654
								P48163	ME1	6		Q96PD2	DCBLD2	0.33654
								O60259	KLK8	6		Q9BUH6	PAXX	0.336487
								Q9H013	ADAM19	6		Q8IZ73	RPUSD2	0.336487
								P22413	ENPP1	6		P22307	SCP2	0.336434
								O75096	LRP4	6		Q14139	UBE4A	0.336222
								Q96BN8	OTULIN	6		P53367	ARFIP1	0.336222
								P05161	ISG15	6		P09601	HMOX1	0.336063
								Q92626	PXDN	6		Q9H2H8	PPIL3	0.335746
								P36896	ACVR1B	6		P55145	MANF	0.33564
								Q15113	PCOLCE	6		Q96TA2	YME1L1	0.335376
								O75110	ATP9A	6		P29122	PCSK6	0.335376
								Q08174	PCDH1	6		O60927	PPP1R11	0.335324
								Q8N2S1	LTBP4	6		A0AVT1	UBA6	0.335218
								O00462	MANBA	6		Q8TBB5	KLHDC4	0.33506
								O75197	LRP5	6		P28062	PSMB8	0.334955
								P42892	ECE1	6		Q8NCL4	GALNT6	0.334955
								P00750	PLAT	6		Q01970	PLCB3	0.33485
								Q04446	GBE1	6		P52788	SMS	0.334745
								Q9UN70	PCDHGC3	6		Q9BRR6	ADPGK	0.334326
								Q9H1B5	XYLT2	6		Q8N441	FGFRL1	0.334326
								Q9Y5P6	GMPPB	6		P40394	ADH7	0.334221
								Q9BXX0	EMILIN2	6		Q02742	GCNT1	0.334064
								P26572	MGAT1	6		Q15274	QPRT	0.333907
								P30740	SERPINB1	5		O60645	EXOC3	0.333437
								P11766	ADH5	5		Q9Y4D1	DAAM1	0.333281
								Q9HB07	MYG1	5		Q8NHP8	PLBD2	0.333073
								Q9BVG4	PBDC1	5		O00515	LAD1	0.332969
								Q96ME1	FBXL18	5		Q8NES3	LFNG	0.332865
								Q9UK59	DBR1	5		Q8NB37	GATD1	0.332813
								P51970	NDUFA8	5		O75326	SEMA7A	0.33271
								P09486	SPARC	5		Q9NQR4	NIT2	0.332606
								O15231	ZNF185	5		Q92854	SEMA4D	0.332399
								Q96T51	RUFY1	5		P05362	ICAM1	0.332295
								Q9NPH2	ISYNA1	5		P48163	ME1	0.332192
								P35556	FBN2	5		Q9NPF0	CD320	0.332192
								P12035	KRT3	5		Q9Y547	IFT25	0.331882
								Q8IYB7	DIS3L2	5		Q9Y316	MEMO1	0.33183
								P14550	AKR1A1	5		O75223	GGCT	0.331779
								Q9UJJ9	GNPTG	5		Q8WV99	ZFAND2B	0.331727
								Q96S97	MYADM	5		P51808	DYNLT3	0.331727
								Q96JC1	VPS39	5		Q00169	PITPNA	0.331572
								Q96FQ6	S100A16	5		P52655	GTF2A1	0.331521
								P06865	HEXA	5		O60259	KLK8	0.331418
								P01215	CGA	5		Q9H013	ADAM19	0.331418
								Q8IVM0	CCDC50	5		P15309	ACP3	0.331366
								P26885	FKBP2	5		Q15059	BRD3	0.331315
								Q6ZMP0	THSD4	5		Q9BS40	LXN	0.331315
								Q9BWS9	CHID1	5		O95297	MPZL1	0.331007
								O43847	NRDC	5		Q9BZR6	RTN4R	0.330853
								P46926	GNPDA1	5		Q9Y5Z4	HEBP2	0.33075
								Q8NHP8	PLBD2	5		Q9BXI6	TBC1D10A	0.330596
								O00515	LAD1	5		P22413	ENPP1	0.330289
								P52655	GTF2A1	5		Q8N9N7	LRRC57	0.330238
								Q15059	BRD3	5		P51397	DAP	0.330187
								O95297	MPZL1	5		Q9C0B1	FTO	0.330085
								Q8NC67	NETO2	5		Q9NRY6	PLSCR3	0.330034
								Q99805	TM9SF2	5		Q9NQW7	XPNPEP1	0.329881
								Q9BRT9	GINS4	5		Q13510	ASAH1	0.329779
								Q9Y2B0	CNPY2	5		P15529	CD46	0.329677
								Q9NTM9	CUTC	5		O75096	LRP4	0.32927
								Q8IV36	HID1	5		Q5ZPR3	CD276	0.329016
								Q9NXH9	TRMT1	5		Q9UN36	NDRG2	0.328966
								P20933	AGA	5		Q06546	GABPA	0.328763
								Q10472	GALNT1	5		Q8NC67	NETO2	0.328712
								Q9NQ88	TIGAR	5		Q7Z4H8	POGLUT3	0.328662
								Q9NS00	C1GALT1	5		O14578	CIT	0.328409
								P49447	CYB561	5		Q99805	TM9SF2	0.328308
								Q15642	TRIP10	5		O00468	AGRN	0.328156
								Q9NS86	LANCL2	5		Q96BN8	OTULIN	0.328106
								Q9H4D0	CLSTN2	5		Q9H1Z4	WDR13	0.328106
								Q8WWI5	SLC44A1	5		Q99574	SERPINI1	0.328055
								O75063	FAM20B	5		P78504	JAG1	0.328005
								Q8NFZ8	CADM4	5		Q8NBJ7	SUMF2	0.327502
								Q99674	CGREF1	5		Q9BV57	ADI1	0.327502
								P98095	FBLN2	5		Q92859	NEO1	0.32725
								Q5VSG8	MANEAL	5		P32004	L1CAM	0.32715
								P48507	GCLM	4		Q93063	EXT2	0.3271
								Q9NY33	DPP3	4		Q96C23	GALM	0.32705
								P49903	SEPHS1	4		P05161	ISG15	0.327
								P15941	MUC1	4		Q96HD1	CRELD1	0.326849
								P40121	CAPG	4		P13284	IFI30	0.326749
								P48637	GSS	4		Q9BRT9	GINS4	0.326699
								Q8NCW5	NAXE	4		Q92626	PXDN	0.326649
								O14773	TPP1	4		Q9Y2B0	CNPY2	0.326649
								Q92485	SMPDL3B	4		P36896	ACVR1B	0.326449
								Q9H910	JPT2	4		Q9NTM9	CUTC	0.326449
								Q08722	CD47	4		P49862	KLK7	0.32635
								Q9NUY8	TBC1D23	4		Q15113	PCOLCE	0.32635
								Q8WW59	SPRYD4	4		P50148	GNAQ	0.3262
								P07738	BPGM	4		Q8NG11	TSPAN14	0.32605
								P55145	MANF	4		P05121	SERPINE1	0.325851
								P29122	PCSK6	4		O75110	ATP9A	0.325851
								A0AVT1	UBA6	4		Q9H008	LHPP	0.325851
								Q02742	GCNT1	4		Q14353	GAMT	0.325851
								Q9NQR4	NIT2	4		Q15517	CDSN	0.325802
								Q9Y547	IFT25	4		Q8IV36	HID1	0.325702
								Q9Y316	MEMO1	4		Q8IYB5	SMAP1	0.325652
								O75223	GGCT	4		Q08174	PCDH1	0.325553
								Q9BS40	LXN	4		Q13126	MTAP	0.325553
								Q9Y5Z4	HEBP2	4		P61916	NPC2	0.325553
								Q9BXI6	TBC1D10A	4		Q4J6C6	PREPL	0.325454
								P51397	DAP	4		Q8N8Z6	DCBLD1	0.325454
								Q9C0B1	FTO	4		Q9NXH9	TRMT1	0.325255
								Q9NRY6	PLSCR3	4		Q9H5N1	RABEP2	0.325156
								Q13510	ASAH1	4		Q6UWB1	IL27RA	0.325008
								P15529	CD46	4		P20933	AGA	0.324909
								Q5ZPR3	CD276	4		Q10472	GALNT1	0.32481
								O14578	CIT	4		Q495W5	FUT11	0.324563
								Q9H1Z4	WDR13	4		O94766	B3GAT3	0.324464
								Q9BV57	ADI1	4		Q9NZ53	PODXL2	0.324464
								Q92859	NEO1	4		P52758	RIDA	0.324365
								Q15517	CDSN	4		Q9NQ88	TIGAR	0.324119
								Q13126	MTAP	4		O00204	SULT2B1	0.324119
								P61916	NPC2	4		Q8N2S1	LTBP4	0.32407
								O00204	SULT2B1	4		P42702	LIFR	0.323873
								P42702	LIFR	4		Q9BX67	JAM3	0.323726
								P54802	NAGLU	4		P54802	NAGLU	0.323431
								P29400	COL4A5	4		Q8NCH0	CHST14	0.323284
								Q6UXD5	SEZ6L2	4		O43286	B4GALT5	0.323235
								Q96EI5	TCEAL4	4		Q9NS00	C1GALT1	0.323235
								P16860	NPPB	4		P29400	COL4A5	0.322942
								P15907	ST6GAL1	4		O00462	MANBA	0.322698
								P05062	ALDOB	4		Q9Y6X4	FAM169A	0.322649
								Q9GZN8	ADISSP	4		O75197	LRP5	0.3226
								P29992	GNA11	4		Q6UXD5	SEZ6L2	0.3226
								Q99584	S100A13	4		Q14746	COG2	0.321676
								Q9Y289	SLC5A6	4		Q96EI5	TCEAL4	0.321531
								Q14393	GAS6	4		Q9NUQ3	TXLNG	0.321289
								Q9Y2B1	RXYLT1	4		P16860	NPPB	0.320661
								Q8NEX9	SDR9C7	4		P78325	ADAM8	0.320517
								Q9NYQ6	CELSR1	4		P42892	ECE1	0.320372
								Q9HB40	SCPEP1	4		P15907	ST6GAL1	0.320324
								Q10469	MGAT2	4		P05062	ALDOB	0.320276
								O95471	CLDN7	4		Q96MU8	KREMEN1	0.320036
								O94910	ADGRL1	4		Q9H4A4	RNPEP	0.319844
								Q9UMR5	PPT2	4		P00750	PLAT	0.319365
								P35475	IDUA	4		Q04446	GBE1	0.319174
								P15291	B4GALT1	4		Q9ULC3	RAB23	0.319031
								Q9UJC5	SH3BGRL2	3		Q9UN70	PCDHGC3	0.318936
								P60983	GMFB	3		Q9H1B5	XYLT2	0.318936
								P25208	NFYB	3		P49447	CYB561	0.318412
								Q9NWV4	CZIB	3		Q08431	MFGE8	0.31827
								Q99829	CPNE1	3		Q14802	FXYD3	0.318222
								Q6NVY1	HIBCH	3		Q9NQ84	GPRC5C	0.31808
								Q08554	DSC1	3		Q5MNZ6	WDR45B	0.317985
								P52569	SLC7A2	3		Q14CX7	NAA25	0.317985
								P00918	CA2	3		Q9Y5P6	GMPPB	0.317891
								P29083	GTF2E1	3		Q9GZN8	ADISSP	0.317701
								Q8NCF5	NFATC2IP	3		Q8NBK3	SUMF1	0.317607
								P53367	ARFIP1	3		Q66K79	CPZ	0.317607
								Q9H2H8	PPIL3	3		P29992	GNA11	0.317512
								Q8TBB5	KLHDC4	3		O43657	TSPAN6	0.317465
								Q92854	SEMA4D	3		Q86VP1	TAX1BP1	0.317418
								Q9NPF0	CD320	3		O15484	CAPN5	0.317135
								Q00169	PITPNA	3		Q15642	TRIP10	0.316899
								Q8N9N7	LRRC57	3		Q9NS86	LANCL2	0.316383
								Q9NQW7	XPNPEP1	3		Q99584	S100A13	0.315261
								Q9UN36	NDRG2	3		P42785	PRCP	0.315261
								Q7Z4H8	POGLUT3	3		Q8TCT8	SPPL2A	0.315028
								Q99574	SERPINI1	3		Q6PL24	TMED8	0.315028
								Q9H008	LHPP	3		Q5JS37	NHLRC3	0.314982
								Q8IYB5	SMAP1	3		Q66K14	TBC1D9B	0.314749
								Q8N8Z6	DCBLD1	3		Q14914	PTGR1	0.314425
								P52758	RIDA	3		Q9H4D0	CLSTN2	0.314378
								Q9Y6X4	FAM169A	3		Q9Y289	SLC5A6	0.314332
								Q96MU8	KREMEN1	3		Q68CQ7	GLT8D1	0.31387
								Q9ULC3	RAB23	3		P34949	MPI	0.313824
								Q14CX7	NAA25	3		Q6P587	FAHD1	0.313593
								P34949	MPI	3		Q9BTV6	DPH7	0.313041
								Q6P587	FAHD1	3		Q8WWI5	SLC44A1	0.312628
								Q9Y223	GNE	3		Q9Y223	GNE	0.312582
								Q8N108	MIER1	3		Q14393	GAS6	0.311487
								Q17R31	TATDN3	3		P20962	PTMS	0.310129
								Q5TDH0	DDI2	3		Q8N108	MIER1	0.309904
								P38571	LIPA	3		Q17R31	TATDN3	0.309859
								Q8IZ52	CHPF	3		Q5TDH0	DDI2	0.309814
								Q8WX77	IGFBPL1	3		Q9BXX0	EMILIN2	0.309051
								Q8TCD5	NT5C	3		Q9BZM4	ULBP3	0.307848
								O75144	ICOSLG	3		P38571	LIPA	0.307714
								O95671	ASMTL	3		Q9Y2B1	RXYLT1	0.307316
								Q9Y3C8	UFC1	3		Q2VWP7	PRTG	0.307183
								P12429	ANXA3	3		Q8IZ52	CHPF	0.307095
								Q9UFN0	NIPSNAP3A	3		O75063	FAM20B	0.30705
								P21217	FUT3	3		Q8NEX9	SDR9C7	0.306918
								O75503	CLN5	3		Q8IWK6	ADGRA3	0.30683
								O60243	HS6ST1	3		Q03167	TGFBR3	0.306257
								P12081	HARS1	2		Q8WX77	IGFBPL1	0.306169
								P18858	LIG1	2		Q9Y4D7	PLXND1	0.305862
								P49189	ALDH9A1	2		Q96IU4	ABHD14B	0.305862
								O15305	PMM2	2		Q9NYQ6	CELSR1	0.305818
								O60888	CUTA	2		P24043	LAMA2	0.304509
								Q92954	PRG4	2		Q9HB40	SCPEP1	0.304379
								Q8IZ73	RPUSD2	2		Q10469	MGAT2	0.303989
								P40394	ADH7	2		O95471	CLDN7	0.30347
								P32004	L1CAM	2		P08174	CD55	0.303254
								Q96C23	GALM	2		P27707	DCK	0.302996
								Q14353	GAMT	2		Q8TCD5	NT5C	0.302309
								Q9BX67	JAM3	2		Q8NFZ8	CADM4	0.302095
								Q9H4A4	RNPEP	2		O75144	ICOSLG	0.301796
								O15484	CAPN5	2		O95671	ASMTL	0.30069
								P42785	PRCP	2		O94910	ADGRL1	0.300606
								Q8TCT8	SPPL2A	2		Q9Y3C8	UFC1	0.299803
								Q14914	PTGR1	2		P07108	DBI	0.29888
								Q9BTV6	DPH7	2		P12429	ANXA3	0.298545
								P20962	PTMS	2		Q6NUK1	SLC25A24	0.298503
								Q2VWP7	PRTG	2		Q9UFN0	NIPSNAP3A	0.296595
								Q8IWK6	ADGRA3	2		P07205	PGK2	0.296265
								Q9Y4D7	PLXND1	2		Q92823	NRCAM	0.296019
								Q96IU4	ABHD14B	2		O75354	ENTPD6	0.295855
								P08174	CD55	2		Q99674	CGREF1	0.295732
								P27707	DCK	2		P21217	FUT3	0.294874
								P07108	DBI	2		P06132	UROD	0.294711
								Q6NUK1	SLC25A24	2		P98095	FBLN2	0.294629
								P07205	PGK2	2		Q9BRF8	CPPED1	0.294548
								O75354	ENTPD6	2		P55263	ADK	0.294548
								P06132	UROD	2		Q9UMR5	PPT2	0.293858
								A2RUC4	TYW5	2		A2RUC4	TYW5	0.29273
								Q49AR2	C5orf22	2		Q5VSG8	MANEAL	0.292369
								P63098	PPP3R1	2		P35475	IDUA	0.292289
								Q9H7P6	MVB12B	2		Q49AR2	C5orf22	0.292129
								Q496H8	NRN1L	2		O75503	CLN5	0.291093
								Q96FV2	SCRN2	2		P26572	MGAT1	0.290934
								Q8N8R5	C2orf69	2		P63098	PPP3R1	0.29038
								Q8N158	GPC2	2		Q9H7P6	MVB12B	0.288184
								P32455	GBP1	2		Q496H8	NRN1L	0.287524
								Q13641	TPBG	2		P15291	B4GALT1	0.286982
								Q8N4A0	GALNT4	2		Q96FV2	SCRN2	0.286867
								O75326	SEMA7A	1		Q92484	SMPDL3A	0.284761
								Q66K79	CPZ	1		Q01459	CTBS	0.284761
								Q6PL24	TMED8	1		O00584	RNASET2	0.284761
								P24043	LAMA2	1		Q8N8R5	C2orf69	0.281605
								Q92823	NRCAM	1		Q9BZM5	ULBP2	0.278408
								Q9BRF8	CPPED1	1		Q11206	ST3GAL4	0.278191
								P55263	ADK	1		Q8N158	GPC2	0.277071
								Q92484	SMPDL3A	1		Q6UWW0	LCN15	0.274258
								Q01459	CTBS	1		O60243	HS6ST1	0.273695
								O00584	RNASET2	1		P32455	GBP1	0.270092
								Q9BZM5	ULBP2	1		P00736	C1R	0.264371
								Q6UWW0	LCN15	1		Q86WQ0	NR2C2AP	0.263652
								P00736	C1R	1		Q13641	TPBG	0.26297
								Q86WQ0	NR2C2AP	1		P09529	INHBB	0.261168
								P09529	INHBB	1		Q8N4A0	GALNT4	0.253114
								O15382	BCAT2	1		O15382	BCAT2	0.249357

## Sheet: Supplementary Table 5
DNA repair mechanisms in MCF7 of dynamic PABC model compared to static MCF7 conditioned culture
Cell cycle checkpoints		Count	Gene
GO:0000076	DNA replication checkpoint signaling	6	CDC45/CDC6/CLSPN/ORC1/TIMELESS/TIPIN
GO:0044773	mitotic DNA damage checkpoint signaling	12	BLM/CDK2/CDKN1A/CHEK1/CLSPN/DTL/EME1/FANCD2/MSH2/NOP53/PLK2/TIPIN
GO:0045005	DNA-templated DNA replication maintenance of fidelity	9	BLM/BRCA2/EME1/PCNA/RAD51/RBBP8/RECQL/TIMELESS/TIPIN
R-HSA-69620	Cell Cycle Checkpoints	51	ANAPC4/BLM/CCNE2/CDC45/CDC6/CDK2/CDKN1A/CENPH/CENPK/CENPL/CENPM/CENPO/CENPP/CENPQ/CENPU/CHEK1/CLSPN/DSN1/ERCC6L/EXO1/H2AX/H2BC11/ITGB3BP/KIF2A/KNL1/MCM10/MCM4/MCM7/MIS12/NDEL1/NUP133/NUP85/ORC1/ORC6/PAFAH1B1/PIAS4/PPP1CC/PPP2R5B/PPP2R5D/PPP2R5E/PSMD3/RBBP8/RFC4/RMI1/RPA1/SFN/SPC24/UBE2D1/UBE2S/YWHAH/ZW10
R-HSA-110314	Recognition of DNA damage by PCNA-containing replication complex	7	DTL/PCNA/POLE2/RAD18/RFC4/RPA1/USP1
GO:0000075	cell cycle checkpoint signaling	45	ANAPC15/AURKB/BABAM1/BABAM2/BIRC5/BRCC3/BUB1/BUB1B/BUB3/CCNB1/CDC20/CDC5L/CDCA8/CDK1/CENPF/CUL4A/DUSP1/DYNC1LI1/GTSE1/IER3/IK/INTS7/MAD2L1/MAD2L1BP/MAP3K20/NAE1/NDC80/NSUN2/NUF2/PLK1/PSMG2/PTPN11/RAD1/RHNO1/RINT1/RNASEH2B/RPA2/SPC25/SPDL1/TIPRL/TRIAP1/TRIP13/TTK/ZWILCH/ZWINT
GO:0007093	mitotic cell cycle checkpoint signaling	36	ANAPC15/AURKB/BABAM1/BABAM2/BIRC5/BRCC3/BUB1/BUB1B/BUB3/CCNB1/CDC20/CDCA8/CDK1/CENPF/DUSP1/DYNC1LI1/GTSE1/IER3/IK/MAD2L1/MAD2L1BP/MAP3K20/NAE1/NDC80/NUF2/PLK1/PSMG2/RINT1/RPA2/SPC25/SPDL1/TRIAP1/TRIP13/TTK/ZWILCH/ZWINT
R-HSA-69618	Mitotic Spindle Checkpoint	49	ANAPC10/ANAPC11/ANAPC15/ANAPC16/ANAPC5/AURKB/B9D2/BIRC5/BUB1/BUB1B/BUB3/CDC16/CDC20/CDC23/CDC27/CDCA8/CENPE/CENPF/CENPI/CENPN/CENPS/CKAP5/DYNC1I1/DYNC1I2/DYNC1LI1/DYNLL1/KIF18A/KIF2C/MAD2L1/MAPRE1/NDC80/NUDC/NUF2/NUP107/PLK1/PMF1/PPP2CA/PPP2R1B/PPP2R5C/SEC13/SGO1/SGO2/SKA1/SKA2/SPC25/SPDL1/UBE2C/ZWILCH/ZWINT
GO:0031570	DNA integrity checkpoint signaling	20	BLM/BRCA2/CDC45/CDC6/CDK2/CDKN1A/CHEK1/CLSPN/DTL/EIF2AK4/EME1/FANCD2/H2AX/MSH2/NOP53/ORC1/PLK2/RAD51/TIMELESS/TIPIN
GO:0000077	DNA damage checkpoint signaling	16	BLM/BRCA2/CDK2/CDKN1A/CHEK1/CLSPN/DTL/EIF2AK4/EME1/FANCD2/H2AX/MSH2/NOP53/PLK2/RAD51/TIPIN
hsa03460	Fanconi anemia pathway	9	BLM/BRCA2/EME1/FANCD2/FANCI/RAD51/RMI1/RPA1/USP1
Defective Homologus Recombinant Repair mechanism (HRR) & HDR repair
GO:0006302	double-strand break repair	34	BLM/BRCA2/CDC45/CDCA5/CGAS/CHEK1/DCLRE1B/EME1/FANCD2/FEN1/FOXM1/GINS2/H2AX/HDGFL2/HPF1/HSF1/MAD2L2/MAGEF1/MCM4/MCM7/MSH2/PARP2/PIAS4/PPP4C/PPP5C/RAD51/RAD51AP1/RBBP8/RECQL/RMI1/RPA1/SFR1/SMARCA4/TIMELESS
GO:0000725	recombinational repair	24	BLM/BRCA2/CDC45/CGAS/CHEK1/FEN1/GINS2/H2AX/HDGFL2/HROB/MAD2L2/MAGEF1/MCM4/MCM7/PIAS4/PPP4C/RAD51/RAD51AP1/RBBP8/RECQL/RMI1/RPA1/SFR1/TIMELESS
GO:0000724	double-strand break repair via homologous recombination	23	BLM/BRCA2/CDC45/CGAS/CHEK1/FEN1/GINS2/H2AX/HDGFL2/MAD2L2/MAGEF1/MCM4/MCM7/PIAS4/PPP4C/RAD51/RAD51AP1/RBBP8/RECQL/RMI1/RPA1/SFR1/TIMELESS
R-HSA-5693532	DNA Double-Strand Break Repair	24	BLM/BRCA2/CDK2/CHEK1/CLSPN/EME1/EXO1/FEN1/H2AX/H2BC11/PARP2/PCNA/PIAS4/POLE2/PPP4C/PPP5C/RAD51/RAD51AP1/RBBP8/RFC4/RMI1/RPA1/TIMELESS/TIPIN
R-HSA-9701190	Defective homologous recombination repair (HRR) due to BRCA2 loss of function	9	BLM/BRCA2/EXO1/RAD51/RAD51AP1/RBBP8/RFC4/RMI1/RPA1
R-HSA-9701192	Defective homologous recombination repair (HRR) due to BRCA1 loss of function	7	BLM/BRCA2/EXO1/RAD51/RAD51AP1/RBBP8/RMI1
R-HSA-9701193	Defective homologous recombination repair (HRR) due to PALB2 loss of function	7	BLM/BRCA2/EXO1/RAD51/RAD51AP1/RBBP8/RMI1
R-HSA-9704331	Defective HDR through Homologous Recombination Repair (HRR) due to PALB2 loss of BRCA1 binding function	7	BLM/BRCA2/EXO1/RAD51/RAD51AP1/RBBP8/RMI1
R-HSA-9704646	Defective HDR through Homologous Recombination Repair (HRR) due to PALB2 loss of BRCA2/RAD51/RAD51C binding function	7	BLM/BRCA2/EXO1/RAD51/RAD51AP1/RBBP8/RMI1
R-HSA-176187	Activation of ATR in response to replication stress	12	CDC45/CDC6/CDK2/CHEK1/CLSPN/MCM10/MCM4/MCM7/ORC1/ORC6/RFC4/RPA1
SUMoylation activation
R-HSA-4615885	SUMOylation of DNA replication proteins	10	NUP133/NUP153/NUP155/NUP188/NUP205/NUP50/NUP62/NUP85/PCNA/PIAS4
R-HSA-3108214	SUMOylation of DNA damage response and repair proteins	16	BLM/BMI1/CBX4/NUP133/NUP153/NUP155/NUP188/NUP205/NUP50/NUP62/NUP85/PIAS2/PIAS4/RPA1/SMC1A/SMC3
TP53 activation caused cell cycle arrest
R-HSA-6791312	TP53 Regulates Transcription of Cell Cycle Genes	9	CCNE2/CDK2/CDKN1A/CENPJ/CNOT3/E2F8/PCNA/PLK2/SFN
R-HSA-6804116	TP53 Regulates Transcription of Genes Involved in G1 Cell Cycle Arrest	4	CCNE2/CDK2/CDKN1A/E2F8
hsa04115	p53 signaling pathway	11	CCND3/CCNE2/CDK2/CDK4/CDKN1A/CHEK1/FAS/RRM2/SERPINE1/SFN/SIVA1
R-HSA:6796648	TP53 Regulates Transcription of DNA Repair Genes	18	CCNH/CDK7/ELOA/ELOC/GTF2F2/GTF2H2/MLH1/NELFE/POLR2B/POLR2C/POLR2F/POLR2G/POLR2I/POLR2J/POLR2K/POLR2L/SUPT16H/TCEA1
R-HSA:69610	p53-Independent DNA Damage Response	39	PSMA1/PSMA3/PSMA4/PSMA5/PSMA6/PSMA7/PSMB1/PSMB2/PSMB3/PSMB4/PSMB5/PSMB6/PSMB7/PSMC1/PSMC2/PSMC3/PSMC4/PSMC5/PSMC6/PSMD1/PSMD10/PSMD11/PSMD12/PSMD13/PSMD14/PSMD2/PSMD4/PSMD5/PSMD6/PSMD7/PSMD8/PSMD9/PSME2/PSME3/PSME4/PSMF1/SEM1/UBA52/UBB
R-HSA:69580	p53-Dependent G1/S DNA damage checkpoint	40	CCNA2/PSMA1/PSMA3/PSMA4/PSMA5/PSMA6/PSMA7/PSMB1/PSMB2/PSMB3/PSMB4/PSMB5/PSMB6/PSMB7/PSMC1/PSMC2/PSMC3/PSMC4/PSMC5/PSMC6/PSMD1/PSMD10/PSMD11/PSMD12/PSMD13/PSMD14/PSMD2/PSMD4/PSMD5/PSMD6/PSMD7/PSMD8/PSMD9/PSME2/PSME3/PSME4/PSMF1/SEM1/UBA52/UBB
R-HSA-69613	p53-Independent G1/S DNA damage checkpoint	39	PSMA1/PSMA3/PSMA4/PSMA5/PSMA6/PSMA7/PSMB1/PSMB2/PSMB3/PSMB4/PSMB5/PSMB6/PSMB7/PSMC1/PSMC2/PSMC3/PSMC4/PSMC5/PSMC6/PSMD1/PSMD10/PSMD11/PSMD12/PSMD13/PSMD14/PSMD2/PSMD4/PSMD5/PSMD6/PSMD7/PSMD8/PSMD9/PSME2/PSME3/PSME4/PSMF1/SEM1/UBA52/UBB
R-HSA-69563	p53-Dependent G1 DNA Damage Response	40	CCNA2/PSMA1/PSMA3/PSMA4/PSMA5/PSMA6/PSMA7/PSMB1/PSMB2/PSMB3/PSMB4/PSMB5/PSMB6/PSMB7/PSMC1/PSMC2/PSMC3/PSMC4/PSMC5/PSMC6/PSMD1/PSMD10/PSMD11/PSMD12/PSMD13/PSMD14/PSMD2/PSMD4/PSMD5/PSMD6/PSMD7/PSMD8/PSMD9/PSME2/PSME3/PSME4/PSMF1/SEM1/UBA52/UBB
Mismatch Repair during replication
hsa03430	Mismatch repair	6	EXO1/LIG1/MSH2/PCNA/RFC4/RPA1
hsa03410	Base excision repair	8	ADPRS/FEN1/LIG1/NEIL3/PARP2/PCNA/POLE2/RFC4
R-HSA-5358565	Mismatch repair (MMR) directed by MSH2:MSH6 (MutSalpha)	5	EXO1/LIG1/MSH2/PCNA/RPA1
R-HSA-5358606	Mismatch repair (MMR) directed by MSH2:MSH3 (MutSbeta)	5	EXO1/LIG1/MSH2/PCNA/RPA1
R-HSA-5651801	PCNA-Dependent Long Patch Base Excision Repair	6	FEN1/LIG1/PCNA/POLE2/RFC4/RPA1
R-HSA-5358508	Mismatch Repair	5	EXO1/LIG1/MSH2/PCNA/RPA1
R-HSA-73884	Base Excision Repair	12	ADPRS/FEN1/H2AX/H2BC11/LIG1/NEIL3/PARP2/PCNA/POLE2/RFC4/RPA1/TERF1
hsa03420	Nucleotide excision repair	24	CCNH/CDK7/CETN2/CUL4A/GTF2H2/GTF2H2C/POLD2/POLE3/POLE4/POLR2B/POLR2C/POLR2F/POLR2G/POLR2I/POLR2J/POLR2K/POLR2L/RAD23A/RBX1/RFC2/RFC3/RFC5/RPA2/RPA3
hsa03410	Base excision repair	13	APEX1/APTX/HMGB1/NTHL1/PARP1/POLD2/POLE3/POLE4/RFC2/RFC3/RFC5/TDP1/UNG
GO_BiologicalProcess-EBI-UniProt-GOA-ACAP-ARAP_25.05.2022_00h00	double-strand break repair	34	BLM/BRCA2/CDC45/CDCA5/CGAS/CHEK1/DCLRE1B/EME1/FANCD2/FEN1/FOXM1/GINS2/H2AX/HDGFL2/HPF1/HSF1/MAD2L2/MAGEF1/MCM4/MCM7/MSH2/PARP2/PIAS4/PPP4C/PPP5C/RAD51/RAD51AP1/RBBP8/RECQL/RMI1/RPA1/SFR1/SMARCA4/TIMELESS
GO_BiologicalProcess-EBI-UniProt-GOA-ACAP-ARAP_25.05.2022_00h00	recombinational repair	24	BLM/BRCA2/CDC45/CGAS/CHEK1/FEN1/GINS2/H2AX/HDGFL2/HROB/MAD2L2/MAGEF1/MCM4/MCM7/PIAS4/PPP4C/RAD51/RAD51AP1/RBBP8/RECQL/RMI1/RPA1/SFR1/TIMELESS
GO_BiologicalProcess-EBI-UniProt-GOA-ACAP-ARAP_25.05.2022_00h00	double-strand break repair via homologous recombination	23	BLM/BRCA2/CDC45/CGAS/CHEK1/FEN1/GINS2/H2AX/HDGFL2/MAD2L2/MAGEF1/MCM4/MCM7/PIAS4/PPP4C/RAD51/RAD51AP1/RBBP8/RECQL/RMI1/RPA1/SFR1/TIMELESS
GO_BiologicalProcess-EBI-UniProt-GOA-ACAP-ARAP_25.05.2022_00h00	regulation of double-strand break repair via homologous recombination	10	CGAS/CHEK1/HDGFL2/MAD2L2/MAGEF1/PIAS4/PPP4C/RAD51/RAD51AP1/TIMELESS
APC/C: CDC20 activated pathways
R-HSA-174184	Cdc20:Phospho-APC/C mediated degradation of Cyclin A	54	ANAPC10/ANAPC11/ANAPC15/ANAPC16/ANAPC5/BUB1B/BUB3/CCNA2/CDC16/CDC20/CDC23/CDC27/CDK1/MAD2L1/PSMA1/PSMA3/PSMA4/PSMA5/PSMA6/PSMA7/PSMB1/PSMB2/PSMB3/PSMB4/PSMB5/PSMB6/PSMB7/PSMC1/PSMC2/PSMC3/PSMC4/PSMC5/PSMC6/PSMD1/PSMD10/PSMD11/PSMD12/PSMD13/PSMD14/PSMD2/PSMD4/PSMD5/PSMD6/PSMD7/PSMD8/PSMD9/PSME2/PSME3/PSME4/PSMF1/SEM1/UBA52/UBB/UBE2C
R-HSA-179419	APC:Cdc20 mediated degradation of cell cycle proteins prior to satisfation of the cell cycle checkpoint	55	ANAPC10/ANAPC11/ANAPC15/ANAPC16/ANAPC5/BUB1B/BUB3/CCNA2/CDC16/CDC20/CDC23/CDC27/CDK1/MAD2L1/NEK2/PSMA1/PSMA3/PSMA4/PSMA5/PSMA6/PSMA7/PSMB1/PSMB2/PSMB3/PSMB4/PSMB5/PSMB6/PSMB7/PSMC1/PSMC2/PSMC3/PSMC4/PSMC5/PSMC6/PSMD1/PSMD10/PSMD11/PSMD12/PSMD13/PSMD14/PSMD2/PSMD4/PSMD5/PSMD6/PSMD7/PSMD8/PSMD9/PSME2/PSME3/PSME4/PSMF1/SEM1/UBA52/UBB/UBE2C
R-HSA-176409	APC/C:Cdc20 mediated degradation of mitotic proteins	57	ANAPC10/ANAPC11/ANAPC15/ANAPC16/ANAPC5/BUB1B/BUB3/CCNA2/CCNB1/CDC16/CDC20/CDC23/CDC27/CDK1/MAD2L1/NEK2/PSMA1/PSMA3/PSMA4/PSMA5/PSMA6/PSMA7/PSMB1/PSMB2/PSMB3/PSMB4/PSMB5/PSMB6/PSMB7/PSMC1/PSMC2/PSMC3/PSMC4/PSMC5/PSMC6/PSMD1/PSMD10/PSMD11/PSMD12/PSMD13/PSMD14/PSMD2/PSMD4/PSMD5/PSMD6/PSMD7/PSMD8/PSMD9/PSME2/PSME3/PSME4/PSMF1/PTTG1/SEM1/UBA52/UBB/UBE2C
R-HSA-174143	APC/C-mediated degradation of cell cycle proteins	62	ANAPC10/ANAPC11/ANAPC15/ANAPC16/ANAPC5/BUB1B/BUB3/CCNA2/CCNB1/CDC16/CDC20/CDC23/CDC27/CDK1/MAD2L1/NEK2/PLK1/PSMA1/PSMA3/PSMA4/PSMA5/PSMA6/PSMA7/PSMB1/PSMB2/PSMB3/PSMB4/PSMB5/PSMB6/PSMB7/PSMC1/PSMC2/PSMC3/PSMC4/PSMC5/PSMC6/PSMD1/PSMD10/PSMD11/PSMD12/PSMD13/PSMD14/PSMD2/PSMD4/PSMD5/PSMD6/PSMD7/PSMD8/PSMD9/PSME2/PSME3/PSME4/PSMF1/PTTG1/SEM1/UBA52/UBB/UBE2C

## Sheet: Supplementary Table 6
DNA replication pathways (S phase) in MCF7 of dynamic PABC model compared to static MCF7 conditioned culture
GO_BiologicalProcess-EBI-UniProt-GOA-ACAP-ARAP_25.05.2022_00h00	DNA replication		48	BLM/BRCA2/CCNE2/CDC34/CDC45/CDC6/CDK2/CDKN1A/CHAF1B/CHEK1/CHRAC1/DTL/DUT/E2F8/EME1/FAM111B/FBXO5/FEN1/GINS1/GINS2/GINS3/GRWD1/HMGA1/LIG1/MCM10/MCM4/MCM7/METTL4/ORC1/ORC6/PCLAF/PCNA/POLE2/PRIM1/RAD51/RBBP8/RECQL/RFC4/RMI1/RPA1/SMC3/SSRP1/TERF1/TIMELESS/TIPIN/TK1/TNFAIP1/TSPYL2
GO_BiologicalProcess-EBI-UniProt-GOA-ACAP-ARAP_25.05.2022_00h00	DNA replication initiation		12	CCNE2/CDC34/CDC45/CDC6/CDK2/GINS3/MCM10/MCM4/MCM7/ORC1/ORC6/PRIM1
GO_MolecularFunction-EBI-UniProt-GOA-ACAP-ARAP_25.05.2022_00h00	DNA replication origin binding		5	CDC45/CDC6/GRWD1/MCM10/ORC1
GO_CellularComponent-EBI-UniProt-GOA-ACAP-ARAP_25.05.2022_00h00	DNA replication preinitiation complex		6	CDC45/GINS1/GINS2/GINS3/MCM4/MCM7
GO_BiologicalProcess-EBI-UniProt-GOA-ACAP-ARAP_25.05.2022_00h00	DNA strand elongation involved in DNA replication		6	GINS1/LIG1/MCM4/MCM7/PCNA/RFC4
GO_BiologicalProcess-EBI-UniProt-GOA-ACAP-ARAP_25.05.2022_00h00	DNA unwinding involved in DNA replication		10	BLM/CDC45/GINS1/GINS2/GINS3/HMGA1/MCM4/MCM7/RAD51/RECQL
GO_BiologicalProcess-EBI-UniProt-GOA-ACAP-ARAP_25.05.2022_00h00	DNA-templated DNA replication		35	BLM/BRCA2/CCNE2/CDC34/CDC45/CDC6/CDK2/CHRAC1/E2F8/EME1/FBXO5/FEN1/GINS1/GINS2/GINS3/HMGA1/LIG1/MCM10/MCM4/MCM7/METTL4/ORC1/ORC6/PCNA/POLE2/PRIM1/RAD51/RBBP8/RECQL/RFC4/RPA1/TERF1/TIMELESS/TIPIN/TK1
GO_BiologicalProcess-EBI-UniProt-GOA-ACAP-ARAP_25.05.2022_00h00	cell cycle DNA replication		15	BLM/BRCA2/CDC45/E2F8/FBXO5/FEN1/GINS1/GINS3/LIG1/MCM4/PCNA/RAD51/TERF1/TIPIN/TK1
GO_BiologicalProcess-EBI-UniProt-GOA-ACAP-ARAP_25.05.2022_00h00	inner cell mass cell proliferation		5	BRCA2/CHEK1/GINS1/NCAPG2/NDEL1
GO_BiologicalProcess-EBI-UniProt-GOA-ACAP-ARAP_25.05.2022_00h00	mitotic DNA replication		8	BRCA2/CDC45/GINS1/GINS3/LIG1/MCM4/RAD51/TK1
GO_BiologicalProcess-EBI-UniProt-GOA-ACAP-ARAP_25.05.2022_00h00	nuclear DNA replication		13	BLM/BRCA2/CDC45/FEN1/GINS1/GINS3/LIG1/MCM4/PCNA/RAD51/TERF1/TIPIN/TK1
GO_CellularComponent-EBI-UniProt-GOA-ACAP-ARAP_25.05.2022_00h00	nuclear replication fork		7	EME1/MCM10/PCNA/PRIM1/RPA1/TIMELESS/TIPIN
GO_BiologicalProcess-EBI-UniProt-GOA-ACAP-ARAP_25.05.2022_00h00	regulation of DNA replication		18	BLM/CDC6/CDK2/CDKN1A/CHRAC1/E2F8/FBXO5/MCM4/MCM7/METTL4/PCNA/RFC4/SMC3/TERF1/TIMELESS/TIPIN/TNFAIP1/TSPYL2
GO_BiologicalProcess-EBI-UniProt-GOA-ACAP-ARAP_25.05.2022_00h00	regulation of DNA-templated DNA replication		11	BLM/CDK2/E2F8/FBXO5/MCM4/MCM7/METTL4/PCNA/RFC4/TIMELESS/TIPIN
GO_CellularComponent-EBI-UniProt-GOA-ACAP-ARAP_25.05.2022_00h00	replication fork		12	BLM/CHEK1/EME1/H2AX/MCM10/PCNA/PRIM1/RAD18/RFC4/RPA1/TIMELESS/TIPIN
GO_BiologicalProcess-EBI-UniProt-GOA-ACAP-ARAP_25.05.2022_00h00	replication fork processing		8	BLM/BRCA2/EME1/PCNA/RAD51/RBBP8/RECQL/TIPIN
GO_BiologicalProcess-EBI-UniProt-GOA-ACAP-ARAP_25.05.2022_00h00	regulation of protein serine/threonine kinase activity		24	AIDA/BLM/CCND3/CCNE2/CCNF/CDC37/CDC6/CDKN1A/CDKN2D/DUSP10/EDN1/EGF/EZH2/FLT3/HGS/HHEX/HRAS/KSR1/LRP5/MAPRE3/PRKAR1B/RGS2/ROBO1/TRIB3
GO_CellularComponent-EBI-UniProt-GOA-ACAP-ARAP_25.05.2022_00h00	cyclin-dependent protein kinase holoenzyme complex		13	BCCIP/CCNA2/CCNB1/CCNB2/CCNC/CCNH/CCNJL/CCNP/CDK1/CDK7/CKS1B/CKS2/SNW1
GO_BiologicalProcess-EBI-UniProt-GOA-ACAP-ARAP_25.05.2022_00h00	positive regulation of cell cycle		57	ANAPC11/ANAPC5/ANAPC7/AURKA/AURKB/BECN1/BIRC5/BUB1/CCNB1/CDC16/CDC20/CDC23/CDC25C/CDC73/CDCA8/CDK1/CHMP3/CPSF3/CUL4A/CYP1A1/DBF4/DDRGK1/DLGAP5/DYNC1LI1/ECT2/FAM83D/GPSM2/KIF14/KIF20B/KIF23/KIF3B/LSM10/MACROH2A1/MAD2L1/MAD2L1BP/MAP3K20/NCAPG/NCAPH/NDC80/NPM1/NSFL1C/PBX1/PHB2/PLRG1/POLDIP2/RACGAP1/RAD21/RAD51C/RANBP1/RDX/RGCC/RHNO1/RHOA/RRM1/SASS6/SPAG5/UBE2C
GO_BiologicalProcess-EBI-UniProt-GOA-ACAP-ARAP_25.05.2022_00h00	regulation of cyclin-dependent protein kinase activity		57	BCCIP/CCNA2/CCNB1/CCNB2/CCNH/CCNJL/CCNP/CDC25C/CDK5RAP1/CDK7/CDKN3/GADD45A/GTPBP4/HSP90AB1/IPO5/PLK1/PSMD10/RGCC

## Sheet: Supplementary Table 7
Overlapping 25 genes between inflammation-EMT-angiogenesis
HMGB1
RHOA
HMOX1
RGCC
EDN1
CYP1B1
ATP5F1B
MIA3
HLA-A
LGMN
F3
CFL1
ROBO1
CALR
SERPINE1
WDR1
TGFBR1
ROCK2
HIF1A
PRKCA
PPARG
SNAI2
STAT1
ECM1
TGFB1
Overlapping 22 genes between inflammation-EMT
CCL5
PTGER4
B2M
CCL22
CCL26
TNFRSF1A
TNFRSF18
CXCL16
BSG
LGALS9
HLA-E
TGFB3
ZP3
CD81
IFNL1
IFNB1
DAB2
CASP8
S100A4
CD109
FBN1
HLA-B
Overlapping 15 genes between EMT-angiogenesis
NFE2L2
PDCD10
GADD45A
AAMP
MYDGF
PDCL3
VTN
CIB1
FBXW7
PLK2
EGF
EMC10
CDKN1A
ADAMTS9
LGALS8
Overlapping 5 genes between angiogenesis-inflammation
PPIA
TIMP1
CLU
JAK1
IFNGR2
Adherens junction genes were downregulated
ITGA3
ITGA2B
CDH1
CDH3
NRCAM
JAK2
COL1A1
AFDN
LAMA5
ITGB4
ITGA7
THBS1
ITGAV
CDH11
COL6A1
COL6A2
CDH18
ADAMTS13
ITGA5
COL6A3
JUP
PLEC
BCAM
COL4A5
LAMB3

## Sheet: Supplementary Table 8
Cluster			Cluster composition
-1921			Gene	C: Cluster	Accession	Name	#peptides	MCF7-1	MCF7-2	MCF7-3	BEWO1	BEWO2	BEWO3	B1C	B2C	B3C	T1C	T2C	T3C	M1C	M2C	M3C
			FLRT3	Cluster -1921	Q9NZU0	Leucine-rich repeat transmembrane protein FLRT3	11	0.754275	0.753278	0.721557	-1.41748	-0.689295	-1.07399	-1.42222	-0.451621	0.213685	0.490227	1.19484	0.301819	-0.886052	1.92749	-0.416509
-1871			MRI1	Cluster -1921	Q9BV20	Methylthioribose-1-phosphate isomerase	5	0.594494	0.984347	0.584937	-0.508102	0.0822728	-0.535062	-2.48818	-1.07196	0.190837	-0.212139	0.168109	0.166241	-0.4322	1.96405	0.512354
-1906			TMED4	Cluster -1921	Q7Z7H5	Transmembrane emp24 domain-containing protein 4	3	-0.0243011	0.0474002	0.0830918	-0.766426	0.0364282	-0.231012	-2.45474	-0.297653	1.8433	0.90754	0.241628	0.54204	-1.30683	0.668275	0.711253
			RAB35	Cluster -1921	Q15286	Ras-related protein Rab-35	6	0.726487	0.753046	0.757466	-0.402927	-0.590038	-0.274968	-2.29763	0.201132	0.918399	-0.778522	0.734312	0.904337	-1.64802	0.949145	0.0477812
-1919			GNA13	Cluster -1921	Q14344	Guanine nucleotide-binding protein subunit alpha-13	20	0.981267	0.897217	0.990466	-1.17938	-0.840414	-0.912251	-1.51862	-1.32992	1.51709	0.158694	0.920219	0.394439	-0.534799	0.741642	-0.285648
			ENPP1	Cluster -1921	P22413	Ectonucleotide pyrophosphatase/phosphodiesterase family member 1	17	0.42183	0.296783	0.45582	-1.02937	-0.413917	-0.754335	-2.17208	-0.584484	1.12096	0.620158	0.714139	0.924965	-1.01298	1.61076	-0.198238
			MYO1B	Cluster -1921	O43795	Unconventional myosin-Ib	36	0.734016	0.686702	0.735592	-0.292087	-0.0165674	-0.158985	-2.07977	-0.0554048	1.22913	0.0211727	0.151505	0.483031	-2.35199	0.839234	0.0744207
			GNAI3	Cluster -1921	P08754	Guanine nucleotide-binding protein G(i) subunit alpha-3	9	0.924416	0.933504	0.942048	-0.742631	-0.132675	-0.734929	-2.75674	0.265246	0.284642	-0.637012	0.531204	0.811043	-0.488119	0.957829	-0.157827
			MOV10	Cluster -1921	Q9HCE1	Helicase MOV-10	9	-0.252919	-0.179727	0.595257	-0.565501	-0.688772	-1.35813	-1.26233	0.426544	-1.13283	1.537	1.02125	1.79652	-0.657952	0.873583	-0.152007
-1916			FAM234A	Cluster -1921	Q9H0X4	Protein FAM234A	10	0.878206	0.652718	0.967163	-0.737729	-0.457189	-0.482543	-0.956987	-0.0488933	-0.484927	0.43787	0.979551	0.819981	-2.09465	1.56325	-1.03582
			GPRC5A	Cluster -1921	Q8NFJ5	Retinoic acid-induced protein 3	9	1.1512	1.06942	1.10608	-0.977746	-0.592447	-0.809209	-1.22591	-1.10154	-0.912551	0.801988	0.860923	0.985243	-0.961926	1.11951	-0.51303
			LLGL2	Cluster -1921	Q6P1M3	LLGL scribble cell polarity complex component 2	29	0.783285	0.886745	0.800054	-0.891682	-0.499894	-0.764279	-0.731273	0.313991	-2.03108	0.902234	1.06923	0.551115	-1.39329	1.16014	-0.155298
-1908			TPBG	Cluster -1921	Q13641	Trophoblast glycoprotein	8	0.636443	0.699216	0.709835	-0.97907	-0.58287	-0.859041	-1.33847	-0.723073	-0.0145439	1.10279	0.880563	0.848293	-1.9721	1.23407	0.357958
			MFGE8	Cluster -1921	Q08431	Lactadherin	11	0.956152	0.739269	0.924166	-0.313419	-0.717578	-0.411477	-1.06151	-0.469706	-1.50458	-0.870507	1.04487	1.38265	-0.870357	1.60727	-0.435244
			RAP2B	Cluster -1921	P61225	Ras-related protein Rap-2b	4	1.29657	0.614031	0.606004	-0.540545	-0.204942	-0.226154	-1.521	0.17374	-0.627524	-0.825737	0.747063	1.81223	-1.60269	0.960171	-0.66121
-1915			SERPINB5	Cluster -1921	P36952	Serpin B5	4	1.13309	-0.242822	-0.170956	-1.44764	0.790308	-1.00452	-0.16363	0.104113	-0.285611	-0.197028	1.35473	1.48216	-1.68021	1.12098	-0.792965
			ITGA3	Cluster -1921	P26006	Integrin alpha-3	16	0.783206	0.614465	0.526522	-0.619275	-0.456866	-0.471468	-0.613856	-0.0789145	-2.09377	0.485311	1.2061	1.30325	-1.43417	1.2445	-0.395042
			ATP2B1;ATP2B2;ATP2B3;ATP2B4	Cluster -1921	P20020;P23634;Q01814;Q16720	Plasma membrane calcium-transporting ATPase 1	7	0.888433	0.625893	0.937108	-0.252419	-0.0278523	-0.253239	-0.0675883	-0.254662	-1.87159	-0.44806	0.328134	1.70965	-1.90967	1.06741	-0.471544
			ITGA2	Cluster -1921	P17301	Integrin alpha-2	17	0.476568	0.420676	0.546768	-0.921617	-0.254181	-0.893472	-0.529159	0.504038	-0.86726	-0.758357	0.745588	1.6309	-1.7633	1.83539	-0.172582
			CD59	Cluster -1921	P13987	CD59 glycoprotein	6	0.842331	0.615915	0.86272	-1.19511	-1.14367	-1.50531	-0.529216	1.01322	-0.252514	0.270517	1.19747	0.858707	-1.00964	1.11201	-1.13743
-1899			LAMP2	Cluster -1921	P13473	Lysosome-associated membrane glycoprotein 2	6	1.2102	0.345381	0.565917	-0.687006	0.00885374	-1.24287	-0.488454	0.600073	-0.0388544	-1.05059	0.0316587	1.42609	-1.55213	1.76841	-0.896683
-1913			HRAS;NRAS	Cluster -1921	P01111;P01112	GTPase NRas	4	0.841336	0.750245	0.532041	-0.0607503	-0.0493253	-0.210128	-1.11533	-0.437412	-2.3133	0.207066	0.849463	1.1416	-1.52799	1.04074	0.351726
			IGF1R	Cluster -1921	P08069	Insulin-like growth factor 1 receptor	15	0.980639	0.81295	0.731564	-0.239402	-0.103882	-0.179929	-2.14502	-0.0186971	-1.12121	0.778102	0.895632	0.569506	-1.81994	0.914391	-0.0547061
-1920			NPNT	Cluster -1921	Q6UXI9	Nephronectin	23	0.935358	1.01185	1.00339	-0.342577	-0.174832	-0.231958	-1.99146	-1.31142	-0.50561	0.340923	-0.202715	0.54149	1.73602	0.357441	-1.1659
			ARF6	Cluster -1921	P62330	ADP-ribosylation factor 6	9	1.33793	1.19478	1.04785	-0.79935	-0.203929	-0.563915	-1.9018	-1.24623	-0.385931	-0.241538	0.317429	0.270235	0.889989	1.21516	-0.930682
			RAB5C	Cluster -1921	P51148	Ras-related protein Rab-5C	6	0.230966	-0.0776206	0.077993	-0.200854	-0.290495	-0.446142	-0.860141	-0.255259	-1.25247	0.625145	-0.641224	-0.704579	2.57983	1.73552	-0.520672
			TSPAN15	Cluster -1921	O95858	Tetraspanin-15	4	0.503332	0.600997	1.03697	-0.783655	-0.339707	-0.743835	-1.86346	0.946651	-0.137279	-0.992464	-0.374922	-0.411644	1.18325	1.9123	-0.536538
			ITGAV	Cluster -1921	P06756	Integrin alpha-V	26	0.532265	0.38706	0.398153	-0.429138	-0.093038	-0.316536	-2.43269	-0.162384	0.81527	-0.456954	0.776537	0.709159	1.21362	0.809116	-1.75044
			ZG16B	Cluster -1921	Q96DA0	Zymogen granule protein 16 homolog B	4	1.25381	1.21395	0.725197	-0.933951	-0.432753	-0.846786	-0.828715	-0.265247	-0.467827	-0.925847	-0.0967968	1.68469	0.768815	0.804545	-1.65308
			KLK7	Cluster -1921	P49862	Kallikrein-7	13	0.201572	0.00228955	-0.0234117	0.306552	0.670712	0.327468	-1.51546	-0.475006	0.0290799	-1.011	0.123132	2.09555	0.877607	0.478288	-2.08737
			ITGB5	Cluster -1921	P18084	Integrin beta-5	8	0.207595	0.420884	0.44705	-0.282909	0.102762	-0.2322	-1.71994	0.173542	-0.700378	-0.19362	-0.946313	1.71136	1.30478	1.3284	-1.62101
			PLSCR1	Cluster -1921	O15162	Phospholipid scramblase 1	4	0.139904	0.311054	0.66733	0.383438	0.483388	0.128809	-0.374842	1.1268	-1.07859	0.196191	-1.5124	0.760787	-0.189131	1.34725	-2.38998
			IVL	Cluster -1921	P07476	Involucrin	6	0.0046066	-0.606157	1.545	-1.00853	0.763699	-0.789126	-0.921238	0.00414513	0.194139	0.853326	-0.683284	0.811821	0.211353	1.56586	-1.94561
			HTRA1	Cluster -1921	Q92743	Serine protease HTRA1	6	0.778596	1.40858	0.901626	-0.362842	-0.00525106	-0.747742	-0.164392	-2.6594	-0.543446	-0.139096	0.276148	0.693976	0.638575	0.835082	-0.910409
			PLXDC2	Cluster -1921	Q6UX71	Plexin domain-containing protein 2	14	0.519051	0.508904	0.788898	-0.376542	-0.312959	-0.428913	-0.61019	-2.52143	0.651382	0.560827	0.568452	0.268616	0.968396	1.02169	-1.60618
			PCDH1	Cluster -1921	Q08174	Protocadherin-1	10	0.599663	0.652318	0.801354	-1.14144	-0.757156	-0.898951	-1.22849	-1.60432	0.273699	0.180385	0.590196	1.38276	0.228224	1.67757	-0.755813
			L1CAM	Cluster -1921	P32004	Neural cell adhesion molecule L1	24	0.313968	0.175644	0.551785	-1.0872	-0.812688	-0.958256	-0.0960968	-2.22959	0.57844	0.363919	1.04883	0.981095	-0.0523215	1.7394	-0.516938
			THBS1;THBS2;THBS3	Cluster -1921	P07996;P35442;P49746	Thrombospondin-1	2	0.940863	0.69099	0.264312	-0.763779	-0.519968	-0.859704	-0.484742	-2.20599	-0.170787	0.89186	-0.0335577	0.400716	1.51859	1.28944	-0.958246
			THBS1	Cluster -1921	P07996	Thrombospondin-1	86	0.834628	1.11405	0.803291	-0.201934	-0.361777	-0.543991	-0.748026	-2.24941	-0.378357	0.544928	-0.134242	0.41336	1.03379	1.28302	-1.40933
			SERPINA1	Cluster -1921	P01009	Alpha-1-antitrypsin	30	0.671885	0.604733	0.653151	-0.694786	-0.307882	-0.645936	-0.387243	-2.74368	-0.439859	0.422916	0.754492	0.825002	0.550642	1.33964	-0.60307
			NRP1	Cluster -1921	O14786	Neuropilin-1	29	0.51569	0.312682	0.320255	-0.749805	-0.356558	-0.572656	-0.352863	-2.73685	-0.328463	0.54898	0.838481	1.13347	0.759125	1.25751	-0.588996
			PLOD3	Cluster -1921	O60568	Multifunctional procollagen lysine hydroxylase and glycosyltransferase LH3	50	0.418733	0.504531	0.518343	-0.595953	-0.525448	-0.617068	-0.296543	-1.27345	-1.24986	0.468909	0.843313	0.891888	0.0693937	2.28316	-1.43996
			CELSR2	Cluster -1921	Q9HCU4	Cadherin EGF LAG seven-pass G-type receptor 2	79	0.999761	1.15622	0.988037	-0.0318287	-0.0312532	-0.178544	-0.477727	-1.28242	-2.629	-0.0234054	0.536783	0.532131	0.123099	0.94376	-0.625617
			GLG1	Cluster -1921	Q92896	Golgi apparatus protein 1	42	1.32566	1.0379	1.36072	-0.499918	-0.0795987	-0.22081	-0.752819	-1.07668	-2.15909	0.722358	0.211982	0.105642	0.623153	0.559788	-1.15828
			SEPTIN8	Cluster -1921	Q92599	Septin-8	11	0.838527	1.37022	0.485917	-0.00940848	-1.36082	-0.61222	-0.767597	-1.1599	-1.58652	1.1691	0.799178	-0.432004	1.45178	0.213286	-0.39954
			AMIGO2	Cluster -1921	Q86SJ2	Amphoterin-induced protein 2	16	0.591423	0.586633	0.3154	-0.175092	-0.288141	-0.284728	-0.0108946	-1.67338	-2.38596	0.849626	0.321368	0.431949	1.39963	1.02599	-0.703822
			FREM2	Cluster -1921	Q5SZK8	FRAS1-related extracellular matrix protein 2	88	0.700037	1.01408	0.664656	-0.00368543	-0.165234	-0.385289	0.095066	-0.122047	-2.6766	-0.102276	0.42185	0.264432	0.368434	1.42602	-1.49943
			TNFRSF1A	Cluster -1921	P19438	Tumor necrosis factor receptor superfamily member 1A	6	0.194706	0.103547	-0.0573599	-0.508886	-0.135284	-0.508241	0.0454269	-0.0263158	-2.5438	0.784535	0.492451	1.68748	0.487597	1.21587	-1.23172
			CLU	Cluster -1921	P10909	Clusterin	26	1.13757	1.26869	1.32813	-0.420358	-0.440243	-0.560742	-1.71142	-0.693942	-1.56986	0.169142	0.418736	0.679797	0.304786	1.04724	-0.957512
			CCN5	Cluster -1921	O76076	CCN family member 5	17	1.04486	1.04927	1.29325	-0.608657	-0.333582	-0.61051	-0.392823	-1.87043	-1.5552	-0.0118255	0.927461	0.680662	0.301695	0.989105	-0.903275
			LYPD3	Cluster -1921	O95274	Ly6/PLAUR domain-containing protein 3	10	1.04773	0.81498	0.837221	-0.84381	-0.343915	-0.486036	-1.05834	-0.0440999	-1.96279	0.509737	0.699152	0.94409	-0.296875	1.46101	-1.27804
			SCUBE2	Cluster -1921	Q9NQ36	Signal peptide, CUB and EGF-like domain-containing protein 2	9	0.557206	0.597628	0.648832	-0.336875	-0.0771067	-0.2823	-2.01989	-1.8359	-0.308583	0.171793	0.536213	1.02304	0.423966	1.71913	-0.817166
			OLFM1	Cluster -1921	Q99784	Noelin	10	1.15668	1.11161	1.35074	-0.22545	-0.0500073	-0.101981	-1.11144	-2.22128	-0.714594	-0.116863	0.694676	0.603012	-0.316874	0.944598	-1.00281
			NEO1	Cluster -1921	Q92859	Neogenin	42	0.825394	0.791641	0.752207	0.0817891	0.460829	0.140336	-1.18997	-2.01022	-0.0307164	0.478947	0.53364	0.723202	0.0280126	0.645384	-2.23047
			CADM4	Cluster -1921	Q8NFZ8	Cell adhesion molecule 4	10	0.765094	0.833664	0.973079	-0.581054	-0.126526	-0.196413	-0.749409	-1.68326	-0.698583	-0.829299	0.358169	1.70433	-0.37382	1.61629	-1.01226
			ARRDC1	Cluster -1921	Q8N5I2	Arrestin domain-containing protein 1	10	1.06546	1.0531	1.13707	0.0950062	-0.0277082	0.167124	-2.386	-0.689021	-0.216245	-0.16378	0.239567	0.394216	-0.164021	1.12905	-1.63381
			GALNT4	Cluster -1921	Q8N4A0	Polypeptide N-acetylgalactosaminyltransferase 4	16	0.88918	0.826945	0.971015	-0.516209	-0.1161	-0.471444	-1.80277	-0.93591	-1.0107	1.41646	0.896762	0.977371	-1.07322	0.686386	-0.737767
			SLC1A5	Cluster -1921	Q15758	Neutral amino acid transporter B(0)	10	1.41602	1.26064	1.41466	-0.160083	0.214783	0.0449133	-1.18797	-0.923513	-1.48182	-0.339152	0.311108	0.285016	-0.986709	1.2052	-1.0731
			PTPRK	Cluster -1921	Q15262	Receptor-type tyrosine-protein phosphatase kappa	32	1.16718	1.03399	1.15964	-0.102933	0.24534	-0.0457339	-1.61786	-1.69193	-0.652635	0.0794107	0.609785	0.916203	-0.510132	0.84345	-1.43376
			MBTPS1	Cluster -1921	Q14703	Membrane-bound transcription factor site-1 protease	31	0.892197	0.698714	0.631379	-0.378421	0.110163	-0.28938	-1.42523	-1.50247	-0.110881	0.604743	0.673572	0.757148	0.638582	0.951731	-2.25184
			EPHA4	Cluster -1921	P54764	Ephrin type-A receptor 4	16	0.925026	0.78012	0.914033	-0.693211	-0.387687	-0.652722	-1.68874	-1.56811	0.521388	0.322965	0.910357	0.799471	-0.176434	1.31157	-1.31802
			COL18A1	Cluster -1921	P39060	Collagen alpha-1(XVIII) chain	24	0.877888	1.1948	1.03208	-0.493433	-0.189863	-0.640251	-1.20426	-1.20782	-1.3385	0.108772	0.344234	0.790804	0.0567907	1.81152	-1.14277
			CORO1A	Cluster -1921	P31146	Coronin-1A	7	1.10409	1.64373	1.33169	-0.365668	-0.137386	-0.62163	-1.48049	-1.27934	0.206077	-0.119949	1.07507	-0.527337	-0.659035	0.914772	-1.08458
			TFPI	Cluster -1921	P10646	Tissue factor pathway inhibitor	7	0.525547	0.761711	1.08899	0.0946561	-0.239567	-0.0714797	-1.32545	-1.45704	-1.60231	0.801724	1.66292	0.281165	-1.10417	0.822037	-0.238735
			CTSD	Cluster -1921	P07339	Cathepsin D	39	1.2126	1.15673	1.17945	-0.473593	-0.118834	-0.364647	-1.90273	-1.69454	-0.958233	0.304312	0.779763	0.619593	0.0161626	0.794475	-0.550512
			HLA-A	Cluster -1921	P04439	HLA class I histocompatibility antigen, A alpha chain	5	0.491579	0.766555	0.994689	0.0467591	-0.180051	-0.133703	-2.55934	-0.925277	0.0130826	-0.734869	0.443917	1.17454	-0.228179	1.46608	-0.635783
			TIMP1	Cluster -1921	P01033	Metalloproteinase inhibitor 1	12	1.19605	1.02971	1.15181	-0.182422	0.253889	0.0578629	-1.78542	-1.45203	-1.44813	0.458636	0.921242	0.530666	0.17115	0.223236	-1.12624
			CUTA	Cluster -1921	O60888	Protein CutA	4	1.03134	0.878061	0.857268	-0.582587	0.777175	-0.27967	-0.957	-1.88799	-0.144822	-0.268414	0.457773	1.08171	0.446248	0.572932	-1.98202
			AGRN	Cluster -1921	O00468	Agrin	89	0.492612	0.715965	0.574106	0.00863135	-0.385855	-0.408534	-1.07565	-0.849977	-0.687623	0.117153	0.930929	1.06005	-0.28868	1.91573	-2.11886
			CA12	Cluster -1921	O43570	Carbonic anhydrase 12	12	1.12402	1.08214	1.09006	0.00401407	0.254878	0.0703215	-2.00275	-1.26745	-1.61939	0.258419	0.567143	0.465885	-0.487659	0.977937	-0.517572
			PTGFRN	Cluster -1921	Q9P2B2	Prostaglandin F2 receptor negative regulator	34	1.05257	1.06798	1.07977	-0.708543	-0.710318	-0.68651	-1.88182	-0.445175	-1.29897	0.311841	0.198889	0.814958	0.15066	1.59999	-0.545317
			CLSTN2	Cluster -1921	Q9H4D0	Calsyntenin-2	16	0.628819	0.643797	0.621241	-0.0941157	-0.150808	-0.198809	-2.18692	-1.24924	-1.48923	0.806689	0.799524	0.503386	1.02773	1.0394	-0.701464
			NRCAM	Cluster -1921	Q92823	Neuronal cell adhesion molecule	51	0.882769	0.709781	0.787737	-0.538867	-0.107506	-0.383389	-1.0464	-2.28323	-1.42114	0.48464	0.522495	0.889027	0.597813	1.2448	-0.338525
			IGSF1	Cluster -1921	Q8N6C5	Immunoglobulin superfamily member 1	17	0.92572	0.749946	0.810318	-0.936522	-0.563554	-0.728689	-1.51548	-1.55876	-1.13022	-0.09872	0.592056	0.811937	1.3246	1.18438	0.132993
			SEZ6L2	Cluster -1921	Q6UXD5	Seizure 6-like protein 2	19	0.874421	0.793661	0.772832	-0.269769	0.118348	-0.106382	-1.63868	-1.96227	-1.68196	0.283769	0.656866	0.738188	0.63225	1.01792	-0.229184
			EPHA7	Cluster -1921	Q15375	Ephrin type-A receptor 7	15	0.84524	0.669755	0.934163	-0.227021	0.0858777	-0.0628138	-2.20961	-1.59281	-1.15208	0.627872	0.593072	0.850642	0.687452	0.753397	-0.803134
			ALCAM	Cluster -1921	Q13740	CD166 antigen	37	0.619325	0.520924	0.673347	-0.758657	-0.349345	-0.664775	-1.29342	-2.42469	-0.596223	0.571176	0.50787	1.07912	0.569143	1.31005	0.236153
			SEMA3B	Cluster -1921	Q13214	Semaphorin-3B	18	1.08403	0.972663	0.944057	-0.249635	-0.0807264	-0.116535	-2.05694	-1.27297	-1.51477	-0.0365181	0.906471	0.5385	0.297282	1.1252	-0.540116
			ME1	Cluster -1921	P48163	NADP-dependent malic enzyme	28	0.69896	0.714168	0.986859	-0.70942	-0.41738	-0.828084	-1.98749	-1.72698	-0.651361	0.433907	0.21679	1.18854	0.316447	0.853309	0.911741
			STOM	Cluster -1921	P27105	Stomatin	7	1.02306	0.992505	0.988908	-0.784014	-0.276546	-0.736565	-1.85254	-1.55516	-1.02453	0.235497	0.168559	1.00269	0.33658	1.2683	0.213257
			CPE	Cluster -1921	P16870	Carboxypeptidase E	27	0.404815	0.509861	0.492157	-0.0821391	-0.26783	-0.240064	-1.79577	-1.67706	-1.712	0.379607	1.05178	0.918508	0.552773	1.34766	0.117699
			MUC1	Cluster -1921	P15941	Mucin-1	7	0.653505	0.689041	0.657279	-0.602654	-0.688973	-0.573374	-1.91494	-1.63944	-0.649629	0.0813217	0.561437	1.35479	-0.0865663	1.4175	0.740709
			THBS1;THBS2	Cluster -1921	P07996;P35442	Thrombospondin-1	4	0.726467	0.807173	0.661599	-0.101906	0.0243465	-0.0905132	-2.37006	-0.51939	-1.89221	0.513747	0.649857	0.303465	0.940905	0.939004	-0.592481
			TFF1	Cluster -1921	P04155	Trefoil factor 1	3	0.331356	0.328445	0.147266	-0.619377	-0.243973	-0.555134	-1.66262	-1.81157	-1.02229	0.446416	1.11224	1.17989	0.581968	1.65316	0.134215
			SERPINA3	Cluster -1921	P01011	Alpha-1-antichymotrypsin	38	0.560364	0.490232	0.498281	-0.249488	0.0443445	-0.175131	-2.78219	-0.8149	-1.35951	0.483844	0.773307	0.953824	0.497307	0.912344	0.167369
			PRSS23	Cluster -1921	O95084	Serine protease 23	21	1.27834	1.34512	1.20086	-0.337095	-0.243459	-0.425435	-1.51592	-1.82454	-1.20004	-0.12069	0.459282	0.657918	0.15366	0.937118	-0.365109
			CPNE3	Cluster -1921	O75131	Copine-3	20	0.641536	0.487462	0.694249	-1.05332	-0.587693	-0.793961	-1.96763	-0.0398557	-1.41008	-0.239224	0.503773	1.70067	0.341616	1.10486	0.617601
			NCAM2	Cluster -1921	O15394	Neural cell adhesion molecule 2	27	0.946747	0.984054	0.979216	-0.474582	-0.262443	-0.493851	-1.05426	-2.29001	-1.31173	0.211304	0.697154	0.88696	0.339384	1.04357	-0.201512
			PODXL	Cluster -1921	O00592	Podocalyxin	4	1.19834	1.10303	1.15914	-0.186137	-0.00812104	-0.240934	-2.07264	-1.89994	-0.865099	-0.0495783	0.487566	0.616053	-0.152974	0.770758	0.140549
			CASK	Cluster -1921	O14936	Peripheral plasma membrane protein CASK	20	1.10489	1.40693	1.40582	-0.591517	0.00254998	-0.8469	-1.96047	-1.13266	-1.02687	-0.259304	-0.2229	0.276255	0.4748	1.01576	0.353615
			ST14	Cluster -1921	Q9Y5Y6	Suppressor of tumorigenicity 14 protein	30	1.19833	0.978323	1.0855	0.618922	1.05123	0.780242	-1.68125	-0.817354	-0.583392	-0.00151039	0.328167	-0.0773594	-0.745564	-0.186933	-1.94735
			XYLT2	Cluster -1921	Q9H1B5	Xylosyltransferase 2	16	0.913077	0.834708	0.746537	0.436759	0.430928	0.3702	0.172095	-1.37359	-1.36631	-0.180558	0.485188	0.377726	0.10848	0.647436	-2.60268
			CANT1	Cluster -1921	Q8WVQ1	Soluble calcium-activated nucleotidase 1	26	0.995093	1.01155	1.04364	0.77103	0.955375	0.79044	-1.4608	-0.684985	-1.41643	-0.0291429	0.539714	0.1261	-0.853153	-0.0222192	-1.76622
			LSR	Cluster -1921	Q86X29	Lipolysis-stimulated lipoprotein receptor	28	1.23189	1.07038	1.24516	0.646159	0.912774	0.752359	-1.51295	-1.18372	-0.968206	-0.0370194	0.145744	0.00921234	-0.573049	-0.00934577	-1.72938
			METRNL	Cluster -1921	Q641Q3	Meteorin-like protein	16	1.38993	1.46458	1.28746	0.5147	0.529314	0.296891	-0.919893	-1.19911	-0.43179	0.367481	-0.12399	-0.223717	-0.23266	-0.581708	-2.13748
			DDR1	Cluster -1921	Q08345	Epithelial discoidin domain-containing receptor 1	27	0.914223	0.674789	0.896344	0.161706	0.971415	0.603294	-1.20618	-0.894585	-0.793189	0.21512	0.673551	0.450392	-0.833983	0.601656	-2.43455
			CLSTN1	Cluster -1921	O94985	Calsyntenin-1	53	1.15133	1.05494	1.19215	0.18584	0.356084	0.16922	-1.21585	-1.53074	-1.08254	0.327779	0.791043	0.308835	-0.258508	0.5022	-1.95178
			CST3	Cluster -1921	P01034	Cystatin-C	20	1.10022	1.04026	1.22101	0.586497	0.724549	0.491633	-1.07628	-0.644289	-1.05815	0.129025	0.617546	0.19782	-0.591705	-0.40038	-2.33776
			SULF2	Cluster -1921	Q8IWU5	Extracellular sulfatase Sulf-2	38	1.27953	1.30973	1.27196	0.163438	0.227175	0.17958	-1.55913	-1.62493	-1.75283	-0.0644473	0.143477	0.24388	-0.0357588	0.6862	-0.467876
			EIF4H	Cluster -1921	Q15056	Eukaryotic translation initiation factor 4H	10	0.228765	0.162506	0.0897639	0.927083	1.0388	1.24441	-1.90679	-1.35028	-1.61466	-0.0659819	-0.109237	-0.150433	1.13794	0.876241	-0.508122
			RAC1	Cluster -1921	P63000	Ras-related C3 botulinum toxin substrate 1	4	1.2621	1.18413	1.1827	1.00023	0.830813	0.898002	-1.34889	-0.734239	-1.29084	-0.636385	-0.651151	0.0524809	-1.24464	0.284555	-0.788869
			STC1	Cluster -1921	P52823	Stanniocalcin-1	19	1.35111	1.35138	1.35896	0.379193	0.434724	0.415818	-1.19655	-1.86234	-1.66189	0.116235	-0.145272	0.138058	-0.336352	0.0610771	-0.404158
			MAN1A1	Cluster -1921	P33908	Mannosyl-oligosaccharide 1,2-alpha-mannosidase IA	26	1.04322	0.991117	0.94106	0.256215	0.712505	0.330713	-2.37742	-1.31715	-0.841116	0.246319	0.640052	0.229919	0.151034	0.275906	-1.28238
			IGFBP4	Cluster -1921	P22692	Insulin-like growth factor-binding protein 4	22	1.35453	1.28852	1.42456	0.376815	0.599284	0.432269	-0.90955	-1.0761	-2.13853	0.210732	-0.155684	-0.131646	-0.0642102	-0.155124	-1.05587
			STC2	Cluster -1921	O76061	Stanniocalcin-2	25	1.17916	1.07142	1.28284	0.54525	0.788131	0.608262	-1.46909	-1.45308	-1.50179	0.0903178	-0.0794357	0.380305	-0.342414	0.198808	-1.29869
			DKK1	Cluster -1921	O94907	Dickkopf-related protein 1	14	1.2899	1.31332	1.40042	0.620155	0.713922	0.660591	-1.16034	-1.90165	-1.12079	-0.144812	-0.235555	-0.127208	-0.430864	0.0293071	-0.906402
			KLK11	Cluster -1921	Q9UBX7	Kallikrein-11	21	1.44565	1.37852	1.39867	-0.336945	-0.2543	-0.431567	-1.34747	-1.32317	-0.66873	0.406165	-0.157368	0.61522	0.790612	0.0590799	-1.57436
			RTN4RL1	Cluster -1921	Q86UN2	Reticulon-4 receptor-like 1	9	1.66033	1.36306	1.44877	-0.513903	0.341953	-0.088338	-1.23951	-1.33524	-0.740308	0.304578	0.219308	-1.06116	0.204173	0.602112	-1.16583
			GFRA1	Cluster -1921	P56159	GDNF family receptor alpha-1	30	1.18516	1.18276	1.17959	0.0746726	0.201296	0.120368	-1.544	-2.19207	-1.47424	0.211168	0.0939607	0.288105	0.202983	0.451651	0.01859
			TIMP3	Cluster -1921	P35625	Metalloproteinase inhibitor 3	7	1.88638	1.60424	1.41021	-0.586578	-0.120619	-0.474742	0.130876	-1.13515	-0.772959	0.0766385	-0.337894	-0.377916	-0.338599	0.647233	-1.61112
			IGFBP5	Cluster -1921	P24593	Insulin-like growth factor-binding protein 5	28	1.44832	1.39689	1.54663	0.0995929	0.186762	0.0673439	-1.10258	-1.65057	-1.56815	0.522765	-0.240612	-0.19084	0.325156	-0.0436449	-0.797057
			SERPINA5	Cluster -1921	P05154	Plasma serine protease inhibitor	22	1.21587	1.15419	1.15169	-0.154842	0.0615891	-0.16331	-1.55571	-2.54108	0.326028	0.0547277	0.415939	0.175831	0.112459	0.408758	-0.662132
			IGFBP2	Cluster -1921	P18065	Insulin-like growth factor-binding protein 2	29	1.29392	1.46996	1.58788	0.0960645	0.210516	0.205705	-1.16291	-2.06894	-0.786324	0.260962	-0.105056	-0.0882248	0.145684	0.0305067	-1.08973
			EHD1	Cluster -1921	Q9H4M9	EH domain-containing protein 1	16	0.941807	1.0226	1.07777	-0.478938	0.13974	-0.264836	-2.14157	0.0778875	0.148592	-1.36819	0.32545	1.10216	-0.794521	1.137	-0.924957
			MUC16	Cluster -1921	Q8WXI7	Mucin-16	12	1.21509	1.22078	0.983105	-0.473592	-0.204009	-0.539643	-1.05805	-1.2413	-1.30989	-1.34775	0.612736	1.31658	-0.10029	1.0833	-0.157053
			SPPL2A	Cluster -1921	Q8TCT8	Signal peptide peptidase-like 2A	2	1.0409	0.871783	1.10149	-0.450264	-0.45349	-0.306525	-1.35964	0.308661	-0.506314	-1.30849	-1.57129	1.47573	-0.168263	1.36096	-0.0352329
			CD47	Cluster -1921	Q08722	Leukocyte surface antigen CD47	2	1.44003	0.867476	1.24917	-0.643211	-0.262918	-0.577025	-0.117414	-0.179172	-0.334256	-2.16303	0.296624	0.611526	-0.813334	1.46215	-0.836613
			STXBP3	Cluster -1921	O00186	Syntaxin-binding protein 3	20	1.29578	1.28334	1.34265	-0.3446	0.119281	-0.161866	-0.893776	-0.89782	-0.299025	-1.36091	-0.61887	0.920649	-1.52525	1.26247	-0.122056
			HS6ST1	Cluster -1921	O60243	Heparan-sulfate 6-O-sulfotransferase 1	10	0.831512	1.44559	1.09777	0.180572	-0.0134208	-0.0793766	-0.85872	-1.191	-0.190518	-0.402064	-1.29144	1.42893	-0.557964	1.1267	-1.52657
[truncated: 1,812 more rows]

## Sheet: Supplementary Table 9
From the dynamic PABC media vs control dynamic MCF7 media Network made from DEPs and nonDEPs								From the dynamic PABC media vs control dynamic MCF7 media Netwok made from DEP and nonDEPs
[truncated: 605 more rows]

[truncated: 1 more sheets: Supplementary Table 10]
